# Supplementary material for: SMAD2/3 signaling in the uterine epithelium controls endometrial cell homeostasis and regeneration
Source: Research Square preprint supplement (doi:10.21203/rs.3.rs-2081589/v1), 2022-09-30
Supplement: Supplementary file 1 [file 8370b32c8fcf2fadf49838d1.xlsx]

## Sheet: FFA83vsFF_Enriched Terms_up
Category	Term	Count in Selected Genes	Count in Total Population	P-value
GO	intrinsic component of membrane	245	3482	1.23764e-14
GO	small molecule metabolic process	114	1228	7.0276e-14
GO	integral component of membrane	235	3351	9.1049e-14
GO	membrane	368	6095	6.299e-13
GO	oxidoreductase activity	68	622	1.19713e-11
GO	endoplasmic reticulum	113	1359	1.13829e-10
GO	organic acid metabolic process	71	702	1.48035e-10
GO	extracellular region	93	1055	3.29139e-10
GO	hormone metabolic process	23	116	1.8532e-09
GO	catalytic activity	292	4835	2.07866e-09
GO	cellular anatomical entity	653	13280	2.22199e-09
GO	carboxylic acid metabolic process	64	650	3.71816e-09
GO	oxoacid metabolic process	66	684	4.71999e-09
GO	small molecule catabolic process	35	257	5.68326e-09
GO	oxidation-reduction process	63	654	1.15262e-08
GO	transmembrane transport	62	662	4.311e-08
GO	cellular_component	688	14449	5.06317e-08
GO	transmembrane transporter activity	64	708	9.64248e-08
GO	carboxylic acid catabolic process	25	166	1.21965e-07
GO	organic acid catabolic process	25	166	1.21965e-07
GO	transporter activity	69	793	1.29562e-07
GO	lipid metabolic process	74	874	1.31915e-07
GO	mitochondrion	117	1613	1.45539e-07
GO	branched-chain amino acid catabolic process	8	16	1.59775e-07
GO	branched-chain amino acid metabolic process	8	17	2.89812e-07
GO	cellular hormone metabolic process	15	69	3.49946e-07
GO	diterpenoid metabolic process	12	44	3.80303e-07
GO	monocarboxylic acid metabolic process	41	391	5.12038e-07
GO	cellular amino acid catabolic process	15	72	6.28447e-07
GO	hydrolase activity	139	2064	6.46545e-07
GO	sulfur compound metabolic process	29	231	6.64309e-07
GO	terpenoid metabolic process	12	47	8.3132e-07
GO	metabolic process	344	6240	1.1811e-06
GO	oxidoreductase activity, acting on CH-OH group of donors	19	117	1.23554e-06
GO	cellular lipid metabolic process	59	681	1.27715e-06
GO	isoprenoid metabolic process	14	67	1.42907e-06
GO	lipid catabolic process	27	215	1.59636e-06
GO	retinoid metabolic process	11	42	1.81697e-06
GO	regulation of hormone levels	40	402	2.6553e-06
GO	biological_process	674	14155	2.71361e-06
GO	response to stilbenoid	6	11	3.23021e-06
GO	ion transport	69	867	3.33437e-06
GO	cellular lipid catabolic process	21	149	3.68524e-06
GO	monocarboxylic acid binding	13	66	6.77459e-06
GO	alpha-amino acid catabolic process	12	59	1.08055e-05
GO	cellular modified amino acid metabolic process	19	138	1.49138e-05
GO	primary alcohol metabolic process	10	43	1.69356e-05
GO	progesterone metabolic process	6	14	1.86716e-05
GO	fatty acid metabolic process	28	260	2.01184e-05
GO	hydrolase activity, acting on ester bonds	52	636	2.75768e-05
GO	oxidoreductase activity, acting on the CH-OH group of donors, NAD or NADP as acceptor	16	109	3.12457e-05
GO	molecular_function	667	14062	3.52108e-05
GO	carboxylic acid binding	21	174	4.12046e-05
GO	organic hydroxy compound metabolic process	33	347	4.91354e-05
GO	organic acid binding	21	177	5.30995e-05
GO	thiolester hydrolase activity	9	40	5.93017e-05
GO	C21-steroid hormone metabolic process	6	17	6.845e-05
GO	organic substance metabolic process	312	5808	7.24481e-05
GO	cellular ketone metabolic process	11	61	8.09278e-05
GO	monocarboxylic acid catabolic process	13	83	8.62407e-05
GO	sesquiterpenoid metabolic process	3	3	9.28e-05
GO	organic anion transport	28	284	9.72847e-05
GO	monocarboxylic acid transport	13	85	0.000110837
GO	oligosaccharyltransferase complex	5	12	0.000114589
GO	fatty acid oxidation	11	64	0.000127208
GO	negative regulation of blood coagulation	8	35	0.000135791
GO	alpha-amino acid metabolic process	17	137	0.000154706
GO	organonitrogen compound metabolic process	208	3681	0.000158792
GO	negative regulation of hemostasis	8	36	0.000167725
GO	alcohol dehydrogenase (NADP+) activity	6	20	0.000190755
GO	negative regulation of coagulation	8	37	0.000205586
GO	fatty acid catabolic process	11	68	0.000222485
GO	organophosphate metabolic process	48	622	0.000223913
GO	hydrolase activity, acting on carbon-nitrogen (but not peptide) bonds	15	116	0.000235629
GO	endoplasmic reticulum-Golgi intermediate compartment	10	58	0.000249448
GO	oxidoreductase activity, acting on the aldehyde or oxo group of donors, NAD or NADP as acceptor	8	38	0.000250183
GO	lipid oxidation	11	69	0.000254027
GO	glutamine family amino acid catabolic process	6	21	0.000256882
GO	alcohol metabolic process	24	242	0.000274506
GO	cellular amino acid metabolic process	21	199	0.000281439
GO	carboxylic acid transport	20	185	0.000283405
GO	organic acid transport	20	185	0.000283405
GO	serine-type peptidase activity	16	131	0.000287558
GO	ion transmembrane transport	35	414	0.000302169
GO	integral component of organelle membrane	27	289	0.000309958
GO	intrinsic component of plasma membrane	56	771	0.000326012
GO	peptidase activity	39	483	0.000354678
GO	terpenoid catabolic process	3	4	0.00035863
GO	response to glycoprotein	3	4	0.00035863
GO	D3 dopamine receptor binding	3	4	0.00035863
GO	serine hydrolase activity	16	135	0.000405218
GO	cation transport	43	554	0.000417442
GO	fatty acid binding	8	41	0.000433521
GO	zymogen activation	8	41	0.000433521
GO	organelle membrane	100	1592	0.000436608
GO	aldo-keto reductase (NADP) activity	6	23	0.000442202
GO	inorganic molecular entity transmembrane transporter activity	43	561	0.000541469
GO	small molecule biosynthetic process	33	395	0.000548411
GO	organic substance catabolic process	80	1225	0.000551299
GO	nucleobase-containing small molecule metabolic process	31	363	0.000553782
GO	glutathione metabolic process	9	53	0.000567789
GO	side of membrane	29	332	0.000575583
GO	hydrolase activity, acting on carbon-nitrogen (but not peptide) bonds, in linear amides	11	76	0.000598592
GO	catabolic process	91	1440	0.000666359
GO	regulation of body fluid levels	22	228	0.000704736
GO	hormone catabolic process	4	10	0.000706447
GO	cellular response to oxidised low-density lipoprotein particle stimulus	4	10	0.000706447
GO	single-stranded DNA exodeoxyribonuclease activity	4	10	0.000706447
GO	cellular aldehyde metabolic process	8	44	0.000713341
GO	intrinsic component of organelle membrane	28	321	0.000726741
GO	mitochondrial envelope	5	17	0.000740889
GO	cation transmembrane transporter activity	35	436	0.000777363
GO	multi-organism process	10	67	0.000821794
GO	regulation of blood coagulation	10	67	0.000821794
GO	single-stranded DNA 3'-5' exodeoxyribonuclease activity	3	5	0.000866282
GO	anion transport	30	357	0.000877
GO	regulation of hemostasis	10	68	0.000925123
GO	fatty acid beta-oxidation	8	46	0.00096972
GO	retinol metabolic process	5	18	0.000987864
GO	protein maturation	19	191	0.00110701
GO	deoxyribonuclease activity	9	58	0.00111537
GO	oxidoreductase activity, acting on the aldehyde or oxo group of donors	8	47	0.001123
GO	protein processing	15	136	0.00128433
GO	retinoic acid metabolic process	5	19	0.00129109
GO	regulation of coagulation	10	71	0.00130073
GO	carbohydrate derivative metabolic process	43	590	0.00147665
GO	retinal metabolic process	4	12	0.00154839
GO	retinol dehydrogenase activity	4	12	0.00154839
GO	urate metabolic process	4	12	0.00154839
GO	protein deglycosylation	4	12	0.00154839
GO	retinoid binding	5	20	0.00165787
GO	primary alcohol catabolic process	3	6	0.00167416
GO	mitochondrial tricarboxylic acid cycle enzyme complex	3	6	0.00167416
GO	metal ion transport	33	422	0.00167435
GO	multi-organism reproductive process	8	50	0.0017016
GO	serine-type endopeptidase activity	13	113	0.0018061
GO	mitochondrial inner membrane	30	374	0.00181637
GO	multi-multicellular organism process	7	40	0.00192651
GO	dicarboxylic acid metabolic process	10	75	0.00198572
GO	oxidoreductase activity, acting on paired donors, with incorporation or reduction of molecular oxygen	14	128	0.00199081
GO	purine-containing compound metabolic process	23	263	0.00202218
GO	valine catabolic process	2	2	0.00205251
GO	farnesol catabolic process	2	2	0.00205251
GO	farnesol metabolic process	2	2	0.00205251
GO	geranylgeranyl reductase activity	2	2	0.00205251
GO	sesquiterpenoid catabolic process	2	2	0.00205251
GO	acetyl-CoA catabolic process	2	2	0.00205251
GO	dinitrosyl-iron complex binding	2	2	0.00205251
GO	S-nitrosoglutathione binding	2	2	0.00205251
GO	inositol tetrakisphosphate 6-kinase activity	2	2	0.00205251
GO	inositol tetrakisphosphate kinase activity	2	2	0.00205251
GO	cysteine-S-conjugate beta-lyase activity	2	2	0.00205251
GO	oxidoreductase activity, acting on the CH-OH group of donors, disulfide as acceptor	2	2	0.00205251
GO	vitamin-K-epoxide reductase (warfarin-sensitive) activity	2	2	0.00205251
GO	retromer, tubulation complex	2	2	0.00205251
GO	transferase activity, transferring nitrogenous groups	5	21	0.00209568
GO	extracellular space	61	927	0.00211331
GO	alditol:NADP+ 1-oxidoreductase activity	4	13	0.00215689
GO	cellular amide metabolic process	42	587	0.00234979
GO	cell surface	38	517	0.00235338
GO	macromolecule glycosylation	16	159	0.00235443
GO	protein glycosylation	16	159	0.00235443
GO	nucleoside bisphosphate metabolic process	10	77	0.00242358
GO	purine nucleoside bisphosphate metabolic process	10	77	0.00242358
GO	ribonucleoside bisphosphate metabolic process	10	77	0.00242358
GO	inorganic cation transmembrane transporter activity	31	399	0.00251849
GO	integral component of plasma membrane	49	715	0.00256662
GO	fatty acid transport	7	42	0.00257776
GO	intracellular organelle lumen	26	317	0.0026317
GO	membrane-enclosed lumen	26	317	0.0026317
GO	organelle lumen	26	317	0.0026317
GO	retinal dehydrogenase activity	3	7	0.00283126
GO	mannosyl-oligosaccharide 1,2-alpha-mannosidase activity	3	7	0.00283126
GO	iron ion binding	13	119	0.0028694
GO	organelle inner membrane	31	403	0.00292816
GO	lipid binding	44	630	0.00294786
GO	external side of plasma membrane	23	271	0.00295947
GO	regulation of biological quality	159	2872	0.00297663
GO	organophosphate catabolic process	12	106	0.00305344
GO	sulfur compound biosynthetic process	9	67	0.00312046
GO	response to lipoprotein particle	5	23	0.00321488
GO	exodeoxyribonuclease activity, producing 5'-phosphomonoesters	5	23	0.00321488
GO	exodeoxyribonuclease activity	5	23	0.00321488
GO	lyase activity	16	164	0.00321586
GO	ion transmembrane transporter activity	42	598	0.00328727
GO	response to amphetamine	4	15	0.00383023
GO	intrinsic component of external side of plasma membrane	4	15	0.00383023
GO	2-oxoglutarate metabolic process	4	15	0.00383023
GO	carbon-carbon lyase activity	7	45	0.00385628
GO	acetyl-CoA metabolic process	5	24	0.00391164
GO	rough endoplasmic reticulum	8	57	0.00396779
GO	primary metabolic process	280	5435	0.00399505
GO	glycosylation	16	168	0.00407913
GO	vitamin binding	12	110	0.00414363
GO	associative learning	9	70	0.00420939
GO	cation transmembrane transport	25	312	0.00425925
GO	plasma membrane	170	3125	0.00431368
GO	digestive system process	7	46	0.00437439
GO	isoprenoid catabolic process	3	8	0.00437803
GO	polyprenol metabolic process	3	8	0.00437803
GO	cellular detoxification of aldehyde	3	8	0.00437803
GO	negative regulation of wound healing	8	58	0.00442418
GO	xenobiotic metabolic process	8	58	0.00442418
GO	alcohol catabolic process	6	35	0.00447766
GO	COPII-coated ER to Golgi transport vesicle	6	35	0.00447766
GO	isoprenoid binding	5	25	0.00471006
GO	identical protein binding	100	1717	0.00487155
GO	xenobiotic transmembrane transporter activity	4	16	0.00492593
GO	response to amine	4	16	0.00492593
GO	protein N-linked glycosylation	7	47	0.00494338
GO	endopeptidase activity	25	316	0.00500806
GO	peroxisome	13	127	0.0050305
GO	peroxidase activity	6	36	0.00517135
GO	organophosphate biosynthetic process	26	334	0.00525779
GO	transport	149	2711	0.0054335
GO	organic cyclic compound catabolic process	23	285	0.00547791
GO	steroid dehydrogenase activity, acting on the CH-OH group of donors, NAD or NADP as acceptor	5	26	0.0056177
GO	cellular response to lipoprotein particle stimulus	5	26	0.0056177
GO	polyprenol catabolic process	2	3	0.00597193
GO	endoplasmic reticulum mannose trimming	2	3	0.00597193
GO	positive regulation of retrograde protein transport, ER to cytosol	2	3	0.00597193
GO	ubiquitin-dependent glycoprotein ERAD pathway	2	3	0.00597193
GO	adenosine 3',5'-bisphosphate transmembrane transporter activity	2	3	0.00597193
GO	lumenal side of membrane	2	3	0.00597193
GO	negative regulation of dendritic cell antigen processing and presentation	2	3	0.00597193
GO	blood coagulation, fibrin clot formation	2	3	0.00597193
GO	TRAF2-GSTP1 complex	2	3	0.00597193
GO	methyl-branched fatty acid metabolic process	2	3	0.00597193
GO	negative regulation of glucagon secretion	2	3	0.00597193
GO	ceramide translocation	2	3	0.00597193
GO	ceramide-translocating ATPase activity	2	3	0.00597193
GO	positive regulation of response to drug	2	3	0.00597193
GO	purine-nucleoside phosphorylase activity	2	3	0.00597193
GO	urate biosynthetic process	2	3	0.00597193
GO	positive regulation of excitatory synapse assembly	2	3	0.00597193
GO	cytoplasmic side of apical plasma membrane	2	3	0.00597193
GO	Schwann cell microvillus	2	3	0.00597193
GO	peptidyl-glutamic acid carboxylation	2	3	0.00597193
GO	protein carboxylation	2	3	0.00597193
GO	organonitrogen compound catabolic process	41	602	0.00617475
GO	epithelial structure maintenance	4	17	0.00621364
GO	organic hydroxy compound catabolic process	7	49	0.0062461
GO	nucleoside phosphate metabolic process	24	305	0.00628478
GO	mannosyl-oligosaccharide mannosidase activity	3	9	0.00634724
GO	gas transport	3	9	0.00634724
GO	NADP-retinol dehydrogenase activity	3	9	0.00634724
GO	zymogen granule	3	9	0.00634724
GO	lipid storage	5	27	0.006642
GO	steroid hydroxylase activity	5	27	0.006642
GO	negative regulation of response to wounding	9	75	0.00665878
GO	acyl-CoA metabolic process	8	62	0.00666407
GO	thioester metabolic process	8	62	0.00666407
GO	mammary gland development	6	38	0.00679001
GO	heme binding	10	89	0.00692516
GO	microbody	13	132	0.0069409
GO	lysosome	28	376	0.00702703
GO	lytic vacuole	28	376	0.00702703
GO	antioxidant activity	8	63	0.00733845
GO	vesicle	92	1586	0.00766802
GO	neuronal action potential	4	18	0.00770671
GO	glutathione binding	4	18	0.00770671
GO	oligopeptide binding	4	18	0.00770671
GO	visual learning	7	51	0.00778873
GO	oxidoreductase activity, acting on a sulfur group of donors	7	52	0.00865763
GO	blood coagulation	7	52	0.00865763
GO	coagulation	7	52	0.00865763
GO	oxidoreductase activity, acting on peroxide as acceptor	6	40	0.00874712
GO	aminoglycoside antibiotic metabolic process	3	10	0.00876472
GO	bile acid binding	3	10	0.00876472
GO	daunorubicin metabolic process	3	10	0.00876472
GO	doxorubicin metabolic process	3	10	0.00876472
GO	polyketide metabolic process	3	10	0.00876472
GO	water channel activity	3	10	0.00876472
GO	one-carbon compound transport	3	10	0.00876472
GO	uropod	3	10	0.00876472
GO	palmitoyl hydrolase activity	3	10	0.00876472
GO	palmitoyl-(protein) hydrolase activity	3	10	0.00876472
GO	alcohol binding	8	65	0.00883989
GO	steroid dehydrogenase activity	5	29	0.00906939
GO	establishment of localization	153	2835	0.00936595
GO	steroid catabolic process	4	19	0.00941755
GO	fat-soluble vitamin metabolic process	4	19	0.00941755
GO	transaminase activity	4	19	0.00941755
GO	glutathione peroxidase activity	4	19	0.00941755
GO	cofactor binding	4	19	0.00941755
GO	endoribonuclease activity	7	53	0.00959562
GO	carbohydrate derivative catabolic process	11	108	0.00980749
GO	extracellular vesicle	9	80	0.010077
GO	lipid transport	17	201	0.0101011
GO	glutathione transferase activity	5	30	0.0104863
GO	mitochondrial protein complex	20	251	0.0104949
GO	regulation of B cell proliferation	7	54	0.0106057
GO	visual behavior	7	54	0.0106057
GO	hemostasis	7	54	0.0106057
GO	valine metabolic process	2	4	0.0115852
GO	anterior/posterior axon guidance	2	4	0.0115852
GO	mannose trimming involved in glycoprotein ERAD pathway	2	4	0.0115852
GO	protein alpha-1,2-demannosylation	2	4	0.0115852
GO	protein deglycosylation involved in glycoprotein catabolic process	2	4	0.0115852
GO	protein demannosylation	2	4	0.0115852
GO	mitochondrial alpha-ketoglutarate dehydrogenase complex	2	4	0.0115852
GO	aminophospholipid transport	2	4	0.0115852
GO	glucocorticoid biosynthetic process	2	4	0.0115852
GO	operant conditioning	2	4	0.0115852
GO	negative regulation of high voltage-gated calcium channel activity	2	4	0.0115852
GO	otic vesicle formation	2	4	0.0115852
GO	cyclase activator activity	2	4	0.0115852
GO	guanylate cyclase activator activity	2	4	0.0115852
GO	leucine catabolic process	2	4	0.0115852
GO	guanosine-containing compound catabolic process	2	4	0.0115852
GO	phosphatidylethanolamine-translocating ATPase activity	2	4	0.0115852
GO	sphingolipid translocation	2	4	0.0115852
GO	purine nucleobase binding	2	4	0.0115852
GO	microspike	2	4	0.0115852
GO	type III transforming growth factor beta receptor binding	2	4	0.0115852
GO	kynurenine aminotransferase activity	2	4	0.0115852
GO	kynurenine-oxoglutarate transaminase activity	2	4	0.0115852
GO	monoacylglycerol catabolic process	2	4	0.0115852
GO	leptin receptor binding	2	4	0.0115852
GO	growth factor activity	10	96	0.0116012
GO	androsterone dehydrogenase activity	3	11	0.0116501
GO	efflux transmembrane transporter activity	3	11	0.0116501
GO	dicarboxylic acid biosynthetic process	3	11	0.0116501
GO	positive regulation of protein exit from endoplasmic reticulum	3	11	0.0116501
GO	potassium ion binding	3	11	0.0116501
GO	aldehyde dehydrogenase [NAD(P)+] activity	3	11	0.0116501
GO	water transmembrane transporter activity	3	11	0.0116501
GO	retinoic acid binding	3	11	0.0116501
GO	phosphate ion binding	3	11	0.0116501
GO	regulation of excitatory synapse assembly	3	11	0.0116501
GO	positive regulation of lactation	3	11	0.0116501
GO	prolactin receptor binding	3	11	0.0116501
GO	mitochondrial matrix	12	126	0.0119554
GO	nucleobase metabolic process	5	31	0.0120475
GO	female pregnancy	5	31	0.0120475
GO	integral component of synaptic vesicle membrane	5	31	0.0120475
GO	cellular catabolic process	72	1220	0.012222
GO	tetrapyrrole binding	10	97	0.0124273
GO	regulation of secretion	41	629	0.0124806
GO	regulation of hormone secretion	18	223	0.0130076
GO	negative regulation of antigen receptor-mediated signaling pathway	4	21	0.0135367
GO	eating behavior	4	21	0.0135367
GO	acid-thiol ligase activity	4	21	0.0135367
GO	transforming growth factor beta receptor binding	4	21	0.0135367
GO	extracellular organelle	9	84	0.0136498
GO	organic cation transport	5	32	0.0137591
GO	positive regulation of multicellular organism growth	5	32	0.0137591
GO	blastocyst hatching	5	32	0.0137591
GO	hatching	5	32	0.0137591
GO	organism emergence from protective structure	5	32	0.0137591
GO	response to bacterium	21	275	0.0139046
GO	secretory granule	18	225	0.0141484
GO	organic hydroxy compound transport	9	85	0.0146735
GO	nuclease activity	15	177	0.0148385
GO	regulation of peptide hormone secretion	15	177	0.0148385
GO	tertiary alcohol metabolic process	3	12	0.0150173
GO	protein tyrosine kinase activator activity	3	12	0.0150173
GO	striatum development	3	12	0.0150173
GO	negative regulation of keratinocyte proliferation	3	12	0.0150173
GO	regulation of lactation	3	12	0.0150173
GO	3'-5'-exodeoxyribonuclease activity	3	12	0.0150173
GO	inositol metabolic process	3	12	0.0150173
GO	cytokine activity	12	130	0.0150473
GO	sarcoplasmic reticulum	7	58	0.015426
GO	electron transfer activity	7	58	0.015426
GO	NAD binding	7	58	0.015426
GO	regulation of hormone metabolic process	5	33	0.015627
GO	brown fat cell differentiation	5	33	0.015627
GO	cellular metabolic process	279	5551	0.0159588
GO	hormone biosynthetic process	4	22	0.0159644
GO	negative regulation of cytokine secretion	4	22	0.0159644
GO	mitochondrial membrane	35	531	0.0171713
GO	steroid biosynthetic process	8	73	0.0172034
GO	mitochondrial transmembrane transport	8	73	0.0172034
GO	anion transmembrane transport	11	118	0.0181825
GO	glycerophospholipid catabolic process	4	23	0.0186485
GO	protein complex oligomerization	15	182	0.0186713
GO	pyrimidine nucleobase catabolic process	2	5	0.0187312
GO	urate transport	2	5	0.0187312
GO	BRISC complex	2	5	0.0187312
GO	nucleoside bisphosphate catabolic process	2	5	0.0187312
GO	purine nucleoside bisphosphate catabolic process	2	5	0.0187312
GO	ribonucleoside bisphosphate catabolic process	2	5	0.0187312
GO	alcohol dehydrogenase (NAD) activity	2	5	0.0187312
GO	negative regulation of antigen processing and presentation	2	5	0.0187312
GO	female meiosis I	2	5	0.0187312
GO	positive regulation of sequestering of triglyceride	2	5	0.0187312
GO	prostate gland morphogenesis	2	5	0.0187312
GO	glutamate catabolic process	2	5	0.0187312
GO	guanylate cyclase regulator activity	2	5	0.0187312
GO	fatty acid alpha-oxidation	2	5	0.0187312
GO	malate dehydrogenase activity	2	5	0.0187312
GO	regulation of response to drug	2	5	0.0187312
GO	dGTP metabolic process	2	5	0.0187312
GO	nucleobase binding	2	5	0.0187312
GO	T-helper 1 cell differentiation	2	5	0.0187312
GO	inositol trisphosphate kinase activity	2	5	0.0187312
GO	negative regulation of macrophage cytokine production	2	5	0.0187312
GO	cofactor transmembrane transporter activity	2	5	0.0187312
GO	[heparan sulfate]-glucosamine 3-sulfotransferase 1 activity	2	5	0.0187312
GO	vesicle targeting, to, from or within Golgi	2	5	0.0187312
GO	protein K69-linked ufmylation	2	5	0.0187312
GO	protein polyufmylation	2	5	0.0187312
GO	acetyl-CoA hydrolase activity	2	5	0.0187312
GO	protein maturation by [4Fe-4S] cluster transfer	2	5	0.0187312
GO	N-acetylgalactosamine 4-O-sulfotransferase activity	2	5	0.0187312
GO	sphingomyelin metabolic process	3	13	0.0188754
GO	acetyl-CoA biosynthetic process	3	13	0.0188754
GO	water transport	3	13	0.0188754
GO	proton-transporting two-sector ATPase complex, catalytic domain	3	13	0.0188754
GO	anchored component of external side of plasma membrane	3	13	0.0188754
GO	nucleoside-diphosphatase activity	3	13	0.0188754
GO	antigen processing and presentation of exogenous peptide antigen via MHC class II	3	13	0.0188754
GO	negative regulation of cytosolic calcium ion concentration	3	13	0.0188754
GO	response to chemical	111	2030	0.0191252
GO	carboxylic ester hydrolase activity	11	119	0.0192457
GO	lipid biosynthetic process	26	372	0.0192967
GO	carbohydrate biosynthetic process	9	89	0.0193393
GO	apical plasma membrane	20	267	0.019429
GO	regulation of peptide secretion	25	355	0.0197733
GO	positive regulation of B cell proliferation	5	35	0.0198531
GO	regulation of pathway-restricted SMAD protein phosphorylation	6	48	0.0206435
GO	SMAD protein signal transduction	6	48	0.0206435
GO	regulation of transforming growth factor beta receptor signaling pathway	9	90	0.0206566
GO	flavin adenine dinucleotide binding	8	76	0.0214646
GO	regulation of wound healing	11	121	0.0215092
GO	purine nucleotide catabolic process	4	24	0.0215959
GO	intestinal absorption	4	24	0.0215959
GO	2 iron, 2 sulfur cluster binding	4	24	0.0215959
GO	insulin receptor binding	4	24	0.0215959
GO	oxidoreductase complex	10	106	0.0219793
GO	regulation of cellular response to transforming growth factor beta stimulus	9	91	0.0220372
GO	positive regulation of pathway-restricted SMAD protein phosphorylation	5	36	0.0222212
GO	purine-containing compound catabolic process	5	36	0.0222212
GO	scavenger receptor activity	5	36	0.0222212
GO	negative regulation of leukocyte apoptotic process	6	49	0.0226524
GO	vitamin metabolic process	6	49	0.0226524
GO	monooxygenase activity	8	77	0.0230376
GO	alpha-mannosidase activity	3	14	0.023229
GO	coenzyme A metabolic process	3	14	0.023229
GO	long-chain fatty acid binding	3	14	0.023229
GO	tricarboxylic acid cycle enzyme complex	3	14	0.023229
GO	adhesion of symbiont to host	3	14	0.023229
GO	nucleotide transport	3	14	0.023229
GO	divalent metal ion transport	17	221	0.0236265
GO	proteolysis	54	906	0.0236499
GO	endoplasmic reticulum membrane	23	326	0.0241993
GO	inorganic cation transmembrane transport	21	291	0.0244278
GO	endonuclease activity	10	108	0.0246764
GO	Golgi organization	10	108	0.0246764
GO	glycerolipid catabolic process	5	37	0.024765
GO	long-chain fatty acid transport	4	25	0.0248122
GO	glycoprotein metabolic process	9	93	0.0249949
GO	nucleoside phosphate biosynthetic process	13	156	0.0252209
GO	brush border membrane	7	64	0.0253
GO	divalent inorganic cation transport	17	223	0.0255048
GO	collagen-containing extracellular matrix	20	275	0.0256888
GO	regulation of protein secretion	23	328	0.0257454
GO	carbohydrate metabolic process	24	346	0.0258569
GO	channel activity	21	293	0.0260855
GO	passive transmembrane transporter activity	21	293	0.0260855
GO	mitochondrial transport	10	109	0.0261107
GO	inorganic ion transmembrane transport	22	311	0.0263665
GO	active transmembrane transporter activity	17	224	0.026485
GO	fatty acid derivative metabolic process	9	94	0.0265747
GO	calcium-mediated signaling	9	94	0.0265747
GO	positive regulation of hormone secretion	11	125	0.0266132
GO	oxidoreductase activity, acting on the CH-CH group of donors	6	51	0.0270555
GO	nucleoside phosphate catabolic process	6	51	0.0270555
GO	action potential	6	51	0.0270555
GO	glutamine family amino acid metabolic process	6	51	0.0270555
GO	negative regulation of tumor necrosis factor production	6	51	0.0270555
GO	ketosteroid monooxygenase activity	2	6	0.0272597
GO	histidine metabolic process	2	6	0.0272597
GO	acetyl-CoA C-acetyltransferase activity	2	6	0.0272597
GO	cellular ketone body metabolic process	2	6	0.0272597
GO	renal water homeostasis	2	6	0.0272597
GO	carbon dioxide transport	2	6	0.0272597
GO	canalicular bile acid transport	2	6	0.0272597
GO	negative regulation of monocyte chemotactic protein-1 production	2	6	0.0272597
GO	paranodal junction assembly	2	6	0.0272597
GO	enucleate erythrocyte differentiation	2	6	0.0272597
GO	protein binding involved in heterotypic cell-cell adhesion	2	6	0.0272597
GO	histone H3-S10 phosphorylation	2	6	0.0272597
GO	positive regulation of feeding behavior	2	6	0.0272597
GO	fibrinogen binding	2	6	0.0272597
GO	cyclase regulator activity	2	6	0.0272597
GO	regulation of NADP metabolic process	2	6	0.0272597
GO	insulin binding	2	6	0.0272597
GO	malate metabolic process	2	6	0.0272597
GO	extracellularly ATP-gated cation channel activity	2	6	0.0272597
GO	sphingomyelin biosynthetic process	2	6	0.0272597
GO	phosphatidylcholine-translocating ATPase activity	2	6	0.0272597
GO	9-cis-retinoic acid biosynthetic process	2	6	0.0272597
GO	9-cis-retinoic acid metabolic process	2	6	0.0272597
GO	kynurenine metabolic process	2	6	0.0272597
GO	monoacylglycerol metabolic process	2	6	0.0272597
GO	vitamin K metabolic process	2	6	0.0272597
GO	signal peptidase complex	2	6	0.0272597
GO	protein ufmylation	2	6	0.0272597
GO	phospholipid catabolic process	5	38	0.0274885
GO	apical part of cell	10	110	0.0276037
GO	mannosidase activity	3	15	0.0280787
GO	nucleotide transmembrane transporter activity	3	15	0.0280787
GO	regulation of macrophage cytokine production	3	15	0.0280787
GO	antigen processing and presentation of peptide antigen via MHC class II	3	15	0.0280787
GO	antigen processing and presentation of peptide or polysaccharide antigen via MHC class II	3	15	0.0280787
GO	positive regulation of myoblast fusion	3	15	0.0280787
GO	regulation of apoptotic process involved in development	3	15	0.0280787
GO	regulation of apoptotic process involved in morphogenesis	3	15	0.0280787
GO	necroptotic process	3	15	0.0280787
GO	quinone binding	3	15	0.0280787
GO	transition metal ion transport	8	80	0.0282395
GO	nucleotide metabolic process	21	296	0.0287311
GO	negative regulation of protein transport	12	143	0.0293403
GO	negative regulation of tumor necrosis factor superfamily cytokine production	6	52	0.0294552
GO	transferase activity, transferring glycosyl groups	17	227	0.0295957
GO	purine nucleotide metabolic process	17	227	0.0295957
GO	polyol metabolic process	9	96	0.0299433
GO	positive regulation of cold-induced thermogenesis	8	81	0.0301403
GO	lipid modification	13	160	0.0302047
GO	nucleobase-containing compound transmembrane transporter activity	5	39	0.030395
GO	cysteine-type endopeptidase inhibitor activity	5	39	0.030395
GO	iron ion transport	5	39	0.030395
GO	symporter activity	10	112	0.0307705
GO	homeostatic process	69	1218	0.0312904
GO	small molecule binding	113	2111	0.0314143
GO	cytoplasmic vesicle	82	1479	0.0314209
GO	long-chain fatty acid metabolic process	7	67	0.0315718
GO	defense response to protozoan	4	27	0.0320691
GO	regulation of leukocyte apoptotic process	8	82	0.0321271
GO	modified amino acid binding	8	82	0.0321271
GO	bounding membrane of organelle	47	787	0.0322771
GO	intracellular vesicle	82	1482	0.0327492
GO	anatomical structure homeostasis	17	230	0.0329703
GO	vacuole	28	428	0.0333244
GO	cellular metabolic compound salvage	3	16	0.0334217
GO	negative regulation of T cell receptor signaling pathway	3	16	0.0334217
GO	alkali metal ion binding	3	16	0.0334217
GO	aldehyde dehydrogenase (NAD) activity	3	16	0.0334217
GO	dendritic spine head	3	16	0.0334217
GO	protein targeting to lysosome	3	16	0.0334217
GO	filopodium assembly	3	16	0.0334217
GO	negative regulation of peptide secretion	9	98	0.0335992
GO	perikaryon	9	98	0.0335992
GO	ER to Golgi vesicle-mediated transport	9	98	0.0335992
GO	nucleobase-containing small molecule biosynthetic process	7	68	0.0338743
GO	negative regulation of establishment of protein localization	12	147	0.0352504
GO	regulation of insulin secretion	12	147	0.0352504
GO	regulation of secretion by cell	36	581	0.0357659
GO	cell adhesion mediator activity	4	28	0.0361156
GO	calcium channel regulator activity	4	28	0.0361156
GO	positive regulation of JAK-STAT cascade	4	28	0.0361156
GO	carboxylic acid transmembrane transport	7	69	0.0362859
GO	organic acid transmembrane transport	7	69	0.0362859
GO	protein O-linked glycosylation	7	69	0.0362859
GO	BRCA1-A complex	2	7	0.0370311
GO	imidazole-containing compound metabolic process	2	7	0.0370311
GO	C-acetyltransferase activity	2	7	0.0370311
GO	peptidyl-proline 4-dioxygenase activity	2	7	0.0370311
GO	response to mercury ion	2	7	0.0370311
GO	proton-transporting V-type ATPase, V1 domain	2	7	0.0370311
GO	amyloid-beta clearance by cellular catabolic process	2	7	0.0370311
GO	regulation of dendritic cell antigen processing and presentation	2	7	0.0370311
GO	protein localization to membrane raft	2	7	0.0370311
GO	GDP-mannose metabolic process	2	7	0.0370311
GO	peristalsis	2	7	0.0370311
GO	sarcoplasm	2	7	0.0370311
GO	protein activation cascade	2	7	0.0370311
GO	lung lobe morphogenesis	2	7	0.0370311
GO	purine ribonucleotide transport	2	7	0.0370311
GO	leucine metabolic process	2	7	0.0370311
GO	negative regulation of amyloid precursor protein biosynthetic process	2	7	0.0370311
GO	ATP-gated ion channel activity	2	7	0.0370311
GO	negative regulation of stem cell population maintenance	2	7	0.0370311
GO	establishment of blood-brain barrier	2	7	0.0370311
GO	retinal binding	2	7	0.0370311
GO	regulation of epithelial to mesenchymal transition involved in endocardial cushion formation	2	7	0.0370311
GO	type II transforming growth factor beta receptor binding	2	7	0.0370311
GO	arachidonic acid epoxygenase activity	2	7	0.0370311
GO	epoxygenase P450 pathway	2	7	0.0370311
GO	heme transport	2	7	0.0370311
GO	carboxyl-O-methyltransferase activity	2	7	0.0370311
GO	protein carboxyl O-methyltransferase activity	2	7	0.0370311
GO	lamellipodium morphogenesis	2	7	0.0370311
GO	hydrolase activity, acting on carbon-nitrogen (but not peptide) bonds, in cyclic amides	2	7	0.0370311
GO	gamma-secretase complex	2	7	0.0370311
GO	basolateral plasma membrane	13	165	0.0373946
GO	negative regulation of transforming growth factor beta receptor signaling pathway	6	55	0.0374765
GO	purine-containing compound biosynthetic process	10	116	0.0378561
GO	learning	10	116	0.0378561
GO	regulation of transport	82	1493	0.0380051
GO	negative regulation of secretion by cell	12	149	0.0385026
GO	phospholipid metabolic process	19	270	0.0387965
GO	regulation of steroid hormone biosynthetic process	3	17	0.039252
GO	regulation of protein complex assembly	3	17	0.039252
GO	glycoprotein catabolic process	3	17	0.039252
GO	peripheral nervous system development	3	17	0.039252
GO	divalent inorganic cation homeostasis	24	361	0.0395698
GO	monovalent inorganic cation transmembrane transporter activity	18	253	0.0397207
GO	negative regulation of response to external stimulus	21	307	0.0401879
GO	neuromuscular junction development	5	42	0.0402404
GO	regulation of systemic arterial blood pressure	5	42	0.0402404
GO	regulation of lymphocyte apoptotic process	6	56	0.0404312
GO	negative regulation of cellular response to transforming growth factor beta stimulus	6	56	0.0404312
GO	nucleoside bisphosphate biosynthetic process	4	29	0.040443
GO	purine nucleoside bisphosphate biosynthetic process	4	29	0.040443
GO	ribonucleoside bisphosphate biosynthetic process	4	29	0.040443
GO	mitochondrial small ribosomal subunit	4	29	0.040443
GO	organellar small ribosomal subunit	4	29	0.040443
GO	endoplasmic reticulum lumen	7	71	0.0414421
GO	negative regulation of kinase activity	15	202	0.041832
GO	positive regulation of cell proliferation	27	419	0.0423038
GO	metal ion transmembrane transporter activity	20	291	0.0426597
GO	steroid binding	8	87	0.0434015
GO	manganese ion binding	6	57	0.0435292
GO	cis-Golgi network	5	43	0.0439044
GO	regulation of multicellular organism growth	7	72	0.0441897
GO	cytokine receptor binding	15	204	0.044944
GO	pyrophosphate hydrolysis-driven proton transmembrane transporter activity	4	30	0.0450517
GO	response to protozoan	4	30	0.0450517
GO	deoxyribonucleotide metabolic process	4	30	0.0450517
GO	glucose 1-dehydrogenase [NAD(P)] activity	1	1	0.0453352
GO	glucose dehydrogenase activity	1	1	0.0453352
GO	beta-alanine catabolic process	1	1	0.0453352
GO	malonate-semialdehyde dehydrogenase (acetylating) activity	1	1	0.0453352
GO	methylmalonate-semialdehyde dehydrogenase (acylating) activity	1	1	0.0453352
GO	acireductone dioxygenase [iron(II)-requiring] activity	1	1	0.0453352
GO	15-hydroxyprostaglandin-D dehydrogenase (NADP+) activity	1	1	0.0453352
GO	17-alpha,20-alpha-dihydroxypregn-4-en-3-one dehydrogenase activity	1	1	0.0453352
GO	C21-steroid hormone catabolic process	1	1	0.0453352
GO	cellular response to jasmonic acid stimulus	1	1	0.0453352
GO	delta4-3-oxosteroid 5beta-reductase activity	1	1	0.0453352
GO	dihydrotestosterone 17-beta-dehydrogenase activity	1	1	0.0453352
GO	ketoreductase activity	1	1	0.0453352
GO	negative regulation of retinoic acid biosynthetic process	1	1	0.0453352
GO	progesterone catabolic process	1	1	0.0453352
GO	response to jasmonic acid	1	1	0.0453352
GO	negative regulation of non-membrane spanning protein tyrosine kinase activity	1	1	0.0453352
GO	UDP-glucose transmembrane transporter activity	1	1	0.0453352
GO	L-methionine-(S)-S-oxide reductase activity	1	1	0.0453352
GO	L-methionine:thioredoxin-disulfide S-oxidoreductase activity	1	1	0.0453352
GO	propionyl-CoA biosynthetic process	1	1	0.0453352
GO	propionyl-CoA metabolic process	1	1	0.0453352
GO	betaine-aldehyde dehydrogenase activity	1	1	0.0453352
GO	L-aminoadipate-semialdehyde dehydrogenase activity	1	1	0.0453352
GO	regulation of skeletal muscle contraction by action potential	1	1	0.0453352
GO	acetyl-CoA transmembrane transporter activity	1	1	0.0453352
GO	acid-sensing ion channel activity	1	1	0.0453352
GO	3'-tRNA processing endoribonuclease activity	1	1	0.0453352
GO	acetaldehyde biosynthetic process	1	1	0.0453352
GO	hexadecanal metabolic process	1	1	0.0453352
GO	long-chain-alcohol oxidase activity	1	1	0.0453352
GO	long-chain-aldehyde dehydrogenase activity	1	1	0.0453352
GO	medium-chain-aldehyde dehydrogenase activity	1	1	0.0453352
GO	negative regulation of activated CD8-positive, alpha-beta T cell apoptotic process	1	1	0.0453352
GO	negative regulation of chemokine (C-C motif) ligand 4 production	1	1	0.0453352
GO	regulation of chemokine (C-C motif) ligand 4 production	1	1	0.0453352
GO	regulation of interleukin-1 beta secretion	1	1	0.0453352
GO	protein maturation by copper ion transfer	1	1	0.0453352
GO	sequestering of calcium ion	1	1	0.0453352
GO	itaconyl-CoA hydratase activity	1	1	0.0453352
GO	methylglutaconyl-CoA hydratase activity	1	1	0.0453352
GO	[3-methyl-2-oxobutanoate dehydrogenase (acetyl-transferring)] kinase activity	1	1	0.0453352
GO	ADP-ribosyl cyclase activity	1	1	0.0453352
GO	cyclic ADP-ribose hydrolase	1	1	0.0453352
GO	chemokine receptor transport out of membrane raft	1	1	0.0453352
GO	chemokine receptor transport within lipid bilayer	1	1	0.0453352
GO	negative regulation of erythrocyte aggregation	1	1	0.0453352
GO	negative regulation of erythrocyte clearance	1	1	0.0453352
GO	negative regulation of T cell homeostatic proliferation	1	1	0.0453352
GO	negative regulation of transforming growth factor beta3 production	1	1	0.0453352
GO	positive regulation of T cell homeostatic proliferation	1	1	0.0453352
GO	protein transport out of membrane raft	1	1	0.0453352
GO	regulation of erythrocyte clearance	1	1	0.0453352
GO	lipoteichoic acid receptor activity	1	1	0.0453352
GO	oxidised low-density lipoprotein particle clearance	1	1	0.0453352
GO	oxidised low-density lipoprotein particle receptor activity	1	1	0.0453352
GO	response to linoleic acid	1	1	0.0453352
GO	RNA polymerase II proximal promoter sequence-specific DNA binding, bending	1	1	0.0453352
GO	contact site	1	1	0.0453352
GO	mammary gland fat development	1	1	0.0453352
GO	positive regulation of macrophage colony-stimulating factor signaling pathway	1	1	0.0453352
GO	AV node cell-bundle of His cell adhesion involved in cell communication	1	1	0.0453352
GO	cell adhesive protein binding involved in AV node cell-bundle of His cell communication	1	1	0.0453352
GO	electron transporter, transferring electrons from CoQH2-cytochrome c reductase complex and cytochrome c oxidase complex activity	1	1	0.0453352
GO	17-alpha-hydroxyprogesterone aldolase activity	1	1	0.0453352
GO	steroid 17-alpha-monooxygenase activity	1	1	0.0453352
GO	cholesterol 24-hydroxylase activity	1	1	0.0453352
GO	dopamine neurotransmitter receptor activity, coupled via Gs	1	1	0.0453352
GO	D-serine transmembrane transporter activity	1	1	0.0453352
GO	negative regulation of transformation of host cell by virus	1	1	0.0453352
GO	regulation of transformation of host cell by virus	1	1	0.0453352
GO	low-affinity IgG receptor activity	1	1	0.0453352
GO	negative regulation of type I hypersensitivity	1	1	0.0453352
GO	blood coagulation, common pathway	1	1	0.0453352
GO	branch elongation involved in salivary gland morphogenesis	1	1	0.0453352
GO	coronal suture morphogenesis	1	1	0.0453352
GO	fibroblast growth factor receptor signaling pathway involved in hemopoiesis	1	1	0.0453352
GO	fibroblast growth factor receptor signaling pathway involved in mammary gland specification	1	1	0.0453352
GO	fibroblast growth factor receptor signaling pathway involved in negative regulation of apoptotic process in bone marrow	1	1	0.0453352
GO	fibroblast growth factor receptor signaling pathway involved in positive regulation of cell proliferation in bone marrow	1	1	0.0453352
GO	mammary gland bud formation	1	1	0.0453352
GO	mesenchymal cell differentiation involved in lung development	1	1	0.0453352
GO	indanol dehydrogenase activity	1	1	0.0453352
GO	negative regulation of macrophage antigen processing and presentation	1	1	0.0453352
GO	negative regulation of memory T cell differentiation	1	1	0.0453352
GO	regulation of macrophage antigen processing and presentation	1	1	0.0453352
GO	growth hormone receptor activity	1	1	0.0453352
GO	growth hormone receptor complex	1	1	0.0453352
GO	glutamate dehydrogenase (NAD+) activity	1	1	0.0453352
GO	glutamate dehydrogenase [NAD(P)+] activity	1	1	0.0453352
GO	L-cysteine:2-oxoglutarate aminotransferase activity	1	1	0.0453352
GO	response to transition metal nanoparticle	1	1	0.0453352
GO	negative regulation of neutrophil aggregation	1	1	0.0453352
GO	regulation of neutrophil aggregation	1	1	0.0453352
GO	detection of wounding	1	1	0.0453352
GO	embryonic ectodermal digestive tract morphogenesis	1	1	0.0453352
GO	lateral mesodermal cell differentiation	1	1	0.0453352
GO	mesenchyme migration	1	1	0.0453352
GO	right lung morphogenesis	1	1	0.0453352
GO	GMP salvage	1	1	0.0453352
GO	guanine biosynthetic process	1	1	0.0453352
GO	guanine phosphoribosyltransferase activity	1	1	0.0453352
GO	guanine salvage	1	1	0.0453352
GO	hypoxanthine phosphoribosyltransferase activity	1	1	0.0453352
GO	11-beta-hydroxysteroid dehydrogenase (NADP+) activity	1	1	0.0453352
GO	protein kinase C inhibitor activity	1	1	0.0453352
GO	leptomycin B binding	1	1	0.0453352
GO	seminal vesicle morphogenesis	1	1	0.0453352
GO	beta-endorphin binding	1	1	0.0453352
GO	interleukin-2 receptor activity	1	1	0.0453352
GO	trypsinogen activation	1	1	0.0453352
GO	cellular response to alkaline pH	1	1	0.0453352
GO	detection of mechanical stimulus involved in sensory perception of touch	1	1	0.0453352
GO	mechanosensitived potassium channel activity	1	1	0.0453352
GO	response to alkaline pH	1	1	0.0453352
GO	cellular response to cortisol stimulus	1	1	0.0453352
GO	response to cortisol	1	1	0.0453352
GO	chaperone-mediated autophagy translocation complex	1	1	0.0453352
GO	2-oxobutyrate catabolic process	1	1	0.0453352
GO	phytanoyl-CoA dioxygenase activity	1	1	0.0453352
GO	ferritin receptor activity	1	1	0.0453352
GO	brain-derived neurotrophic factor-activated receptor activity	1	1	0.0453352
GO	lumenal side of Golgi membrane	1	1	0.0453352
GO	3-phosphoinositide-dependent protein kinase activity	1	1	0.0453352
GO	phosphatidylethanolamine N-methyltransferase activity	1	1	0.0453352
GO	phosphatidyl-N-dimethylethanolamine N-methyltransferase activity	1	1	0.0453352
GO	phosphatidyl-N-methylethanolamine N-methyltransferase activity	1	1	0.0453352
GO	Sertoli cell barrier remodeling	1	1	0.0453352
GO	carbohydrate export	1	1	0.0453352
GO	daunorubicin transport	1	1	0.0453352
GO	deoxyguanosine catabolic process	1	1	0.0453352
GO	deoxyguanosine metabolic process	1	1	0.0453352
GO	deoxyinosine catabolic process	1	1	0.0453352
GO	deoxyinosine metabolic process	1	1	0.0453352
GO	guanosine catabolic process	1	1	0.0453352
GO	guanosine metabolic process	1	1	0.0453352
GO	inosine catabolic process	1	1	0.0453352
GO	maintenance of granzyme B location in T cell secretory granule	1	1	0.0453352
GO	maintenance of protease location in mast cell secretory granule	1	1	0.0453352
GO	maintenance of protease location in T cell secretory granule	1	1	0.0453352
GO	maintenance of protein location in mast cell secretory granule	1	1	0.0453352
GO	maintenance of protein location in T cell secretory granule	1	1	0.0453352
GO	T cell secretory granule organization	1	1	0.0453352
GO	regulation of circulating fibrinogen levels	1	1	0.0453352
GO	proline dehydrogenase activity	1	1	0.0453352
GO	trimming of terminal mannose on C branch	1	1	0.0453352
GO	plasma membrane raft distribution	1	1	0.0453352
GO	plasma membrane raft localization	1	1	0.0453352
GO	positive regulation of hematopoietic stem cell migration	1	1	0.0453352
GO	regulation of hematopoietic stem cell migration	1	1	0.0453352
GO	denatured protein binding	1	1	0.0453352
GO	retinoic acid receptor signaling pathway involved in somitogenesis	1	1	0.0453352
GO	mannosamine metabolic process	1	1	0.0453352
GO	N-acetylmannosamine metabolic process	1	1	0.0453352
GO	N-acylglucosamine 2-epimerase activity	1	1	0.0453352
GO	D-xylulose reductase activity	1	1	0.0453352
GO	hexitol catabolic process	1	1	0.0453352
GO	hexitol dehydrogenase activity	1	1	0.0453352
GO	L-iditol 2-dehydrogenase activity	1	1	0.0453352
GO	L-xylitol catabolic process	1	1	0.0453352
GO	L-xylitol metabolic process	1	1	0.0453352
GO	pentitol catabolic process	1	1	0.0453352
GO	pentitol metabolic process	1	1	0.0453352
GO	sorbitol catabolic process	1	1	0.0453352
GO	FMN transmembrane transporter activity	1	1	0.0453352
GO	NAD transmembrane transporter activity	1	1	0.0453352
GO	positive regulation of estradiol secretion	1	1	0.0453352
GO	pyridoxal 5'-phosphate salvage	1	1	0.0453352
GO	pyridoxal binding	1	1	0.0453352
GO	pyridoxal kinase activity	1	1	0.0453352
GO	propanoate transport	1	1	0.0453352
GO	propionate transmembrane transporter activity	1	1	0.0453352
GO	short-chain fatty acid import	1	1	0.0453352
GO	short-chain fatty acid transmembrane transporter activity	1	1	0.0453352
GO	short-chain fatty acid transport	1	1	0.0453352
GO	mannosyl-glycoprotein endo-beta-N-acetylglucosaminidase activity	1	1	0.0453352
GO	amine N-methyltransferase activity	1	1	0.0453352
GO	dimethyl selenide methyltransferase activity	1	1	0.0453352
GO	thioether S-methyltransferase activity	1	1	0.0453352
GO	alpha-1,6-mannosylglycoprotein 2-beta-N-acetylglucosaminyltransferase activity	1	1	0.0453352
GO	inositol tetrakisphosphate 1-kinase activity	1	1	0.0453352
GO	inositol-1,3,4-trisphosphate 5-kinase activity	1	1	0.0453352
GO	inositol-1,3,4-trisphosphate 6-kinase activity	1	1	0.0453352
GO	negative regulation of cardiac epithelial to mesenchymal transition	1	1	0.0453352
GO	negative regulation of epithelial to mesenchymal transition involved in endocardial cushion formation	1	1	0.0453352
GO	substantia propria of cornea development	1	1	0.0453352
GO	GDP-mannose 4,6-dehydratase activity	1	1	0.0453352
GO	isopeptide cross-linking via N6-(L-isoglutamyl)-L-lysine	1	1	0.0453352
GO	cellular response to glycoprotein	1	1	0.0453352
GO	cellular response to thyrotropin-releasing hormone	1	1	0.0453352
GO	response to thyrotropin-releasing hormone	1	1	0.0453352
GO	thyroid-stimulating hormone receptor activity	1	1	0.0453352
GO	thyroid-stimulating hormone signaling pathway	1	1	0.0453352
GO	UDP-glucose 6-dehydrogenase activity	1	1	0.0453352
GO	UDP-glucuronate biosynthetic process	1	1	0.0453352
GO	calcitriol binding	1	1	0.0453352
GO	lithocholic acid receptor activity	1	1	0.0453352
GO	positive regulation of DNA ligase activity	1	1	0.0453352
GO	regulation of DNA ligase activity	1	1	0.0453352
GO	3-hydroxyisobutyryl-CoA hydrolase activity	1	1	0.0453352
GO	kynurenine-glyoxylate transaminase activity	1	1	0.0453352
GO	amidophosphoribosyltransferase activity	1	1	0.0453352
GO	detection of hypoxic conditions in blood by carotid body chemoreceptor signaling	1	1	0.0453352
GO	detection of hypoxic conditions in blood by chemoreceptor signaling	1	1	0.0453352
GO	urocanate hydratase activity	1	1	0.0453352
GO	biotin metabolic process	1	1	0.0453352
GO	mitochondrial endopeptidase Clp complex	1	1	0.0453352
GO	methionine-R-sulfoxide reductase activity	1	1	0.0453352
GO	vitamin-K-epoxide reductase (warfarin-insensitive) activity	1	1	0.0453352
GO	protein C-terminal leucine carboxyl O-methyltransferase activity	1	1	0.0453352
GO	aldose 1-epimerase activity	1	1	0.0453352
GO	plasmanylethanolamine desaturase activity	1	1	0.0453352
GO	leukotriene signaling pathway	1	1	0.0453352
GO	2-octaprenyl-6-methoxy-1,4-benzoquinone methylase activity	1	1	0.0453352
GO	[heparan sulfate]-glucosamine 3-sulfotransferase 3 activity	1	1	0.0453352
GO	opsin transport	1	1	0.0453352
GO	dGTP binding	1	1	0.0453352
GO	dGTPase activity	1	1	0.0453352
GO	guanyl deoxyribonucleotide binding	1	1	0.0453352
GO	triphosphoric monoester hydrolase activity	1	1	0.0453352
GO	isovaleryl-CoA dehydrogenase activity	1	1	0.0453352
GO	phytanic acid metabolic process	1	1	0.0453352
GO	mannosyl-oligosaccharide glucosidase activity	1	1	0.0453352
GO	exoribonuclease II activity	1	1	0.0453352
GO	3-hydroxyisobutyrate dehydrogenase activity	1	1	0.0453352
GO	peptide-N4-(N-acetyl-beta-glucosaminyl)asparagine amidase activity	1	1	0.0453352
GO	protein N-linked glycosylation via arginine	1	1	0.0453352
GO	sulfur dioxygenase activity	1	1	0.0453352
GO	mitochondrial oxoglutarate dehydrogenase complex	1	1	0.0453352
GO	asparagine catabolic process via L-aspartate	1	1	0.0453352
GO	beta-aspartyl-peptidase activity	1	1	0.0453352
GO	CDP biosynthetic process	1	1	0.0453352
GO	CDP metabolic process	1	1	0.0453352
GO	CMP kinase activity	1	1	0.0453352
GO	dCDP biosynthetic process	1	1	0.0453352
GO	dCDP metabolic process	1	1	0.0453352
GO	pyrimidine ribonucleoside diphosphate biosynthetic process	1	1	0.0453352
GO	pyrimidine ribonucleoside diphosphate metabolic process	1	1	0.0453352
GO	UDP biosynthetic process	1	1	0.0453352
GO	UDP metabolic process	1	1	0.0453352
GO	short-branched-chain-acyl-CoA dehydrogenase activity	1	1	0.0453352
GO	vesicle targeting, trans-Golgi to periciliary membrane compartment	1	1	0.0453352
GO	phosphoribosylaminoimidazole carboxylase activity	1	1	0.0453352
GO	phosphoribosylaminoimidazolesuccinocarboxamide synthase activity	1	1	0.0453352
GO	amidinotransferase activity	1	1	0.0453352
GO	glycine amidinotransferase activity	1	1	0.0453352
GO	N-(long-chain-acyl)ethanolamine deacylase activity	1	1	0.0453352
GO	UFM1 ligase activity	1	1	0.0453352
GO	coenzyme A catabolic process	1	1	0.0453352
GO	neuromedin B receptor binding	1	1	0.0453352
GO	COPI-coated vesicle budding	1	1	0.0453352
GO	acetyl-CoA biosynthetic process from acetate	1	1	0.0453352
GO	oligosaccharyltransferase I complex	1	1	0.0453352
GO	inositol tetrakisphosphate 3-kinase activity	1	1	0.0453352
GO	inositol tetrakisphosphate 5-kinase activity	1	1	0.0453352
GO	inositol-1,4,5-trisphosphate 6-kinase activity	1	1	0.0453352
GO	sphingosine hydroxylase activity	1	1	0.0453352
GO	glutamine-phenylpyruvate transaminase activity	1	1	0.0453352
GO	host cell perinuclear region of cytoplasm	1	1	0.0453352
GO	inositol biosynthetic process	1	1	0.0453352
GO	inositol-3-phosphate synthase activity	1	1	0.0453352
GO	intramolecular lyase activity	1	1	0.0453352
GO	amine-lyase activity	1	1	0.0453352
GO	strictosidine synthase activity	1	1	0.0453352
GO	calmodulin-lysine N-methyltransferase activity	1	1	0.0453352
GO	heme-transporting ATPase activity	1	1	0.0453352
GO	carnitine O-octanoyltransferase activity	1	1	0.0453352
GO	octanoyltransferase activity	1	1	0.0453352
GO	O-octanoyltransferase activity	1	1	0.0453352
GO	vasoconstriction of artery involved in ischemic response to lowering of systemic arterial blood pressure	1	1	0.0453352
GO	positive regulation of mediator complex assembly	1	1	0.0453352
GO	regulation of mediator complex assembly	1	1	0.0453352
GO	sulfiredoxin activity	1	1	0.0453352
GO	hydroxyisourate hydrolase activity	1	1	0.0453352
GO	myosin II head/neck binding	1	1	0.0453352
GO	myosin II heavy chain binding	1	1	0.0453352
GO	negative regulation of death-inducing signaling complex assembly	1	1	0.0453352
GO	regulation of death-inducing signaling complex assembly	1	1	0.0453352
GO	1,2-diacyl-sn-glycero-3-phosphocholine metabolic process	1	1	0.0453352
GO	lecithin:11-cis retinol acyltransferase activity	1	1	0.0453352
GO	phosphatidylcholine-retinol O-acyltransferase activity	1	1	0.0453352
GO	carbohydrate binding	14	187	0.0454685
GO	thyroid hormone metabolic process	3	18	0.045561
GO	L-ascorbic acid binding	3	18	0.045561
GO	negative regulation of chemokine production	3	18	0.045561
GO	apicolateral plasma membrane	3	18	0.045561
GO	positive regulation of behavior	3	18	0.045561
GO	regulation of myoblast fusion	3	18	0.045561
GO	CoA-ligase activity	3	18	0.045561
GO	cellular process	516	10932	0.0465101
GO	ligand-gated cation channel activity	6	58	0.0467719
GO	icosanoid metabolic process	7	73	0.0470519
GO	extracellular exosome	7	73	0.0470519
GO	protein homooligomerization	11	137	0.047084
GO	negative regulation of transport	26	405	0.0473807
GO	negative regulation of secretion	13	171	0.0475357
GO	drug transmembrane export	2	8	0.0479154
GO	ketone body metabolic process	2	8	0.0479154
GO	aldehyde dehydrogenase (NAD+) activity	2	8	0.0479154
GO	negative regulation of transforming growth factor beta production	2	8	0.0479154
GO	aldehyde biosynthetic process	2	8	0.0479154
GO	3-chloroallyl aldehyde dehydrogenase activity	2	8	0.0479154
GO	polyol transport	2	8	0.0479154
GO	vacuolar lumen	2	8	0.0479154
GO	nucleoside diphosphate catabolic process	2	8	0.0479154
GO	histone-serine phosphorylation	2	8	0.0479154
GO	sexual reproduction	2	8	0.0479154
GO	purine nucleoside catabolic process	2	8	0.0479154
GO	purine ribonucleoside catabolic process	2	8	0.0479154
GO	regulation of glucagon secretion	2	8	0.0479154
GO	proximal dendrite	2	8	0.0479154
GO	retinol binding	2	8	0.0479154
GO	embryonic neurocranium morphogenesis	2	8	0.0479154
GO	positive regulation of ligase activity	2	8	0.0479154
GO	early endosome to Golgi transport	2	8	0.0479154
GO	tissue homeostasis	10	121	0.0482018
GO	response to stimulus	188	3728	0.0488183
GO	regulation of response to wounding	12	155	0.0495131
GO	prostaglandin metabolic process	4	31	0.0499412
GO	prostanoid metabolic process	4	31	0.0499412
GO	quinone metabolic process	4	31	0.0499412
GO	membrane protein proteolysis	4	31	0.0499412
GO	phosphatidylcholine metabolic process	4	31	0.0499412
GO	ligase activity, forming carbon-sulfur bonds	4	31	0.0499412
GO	positive regulation of insulin secretion	7	74	0.0500297
GO	biosynthetic process	92	1719	0.0500885
GO	positive regulation of cell division	6	59	0.0501604
GO	calcium ion transmembrane transport	10	122	0.0504778
GO	inner mitochondrial membrane protein complex	10	122	0.0504778
GO	response to other organism	39	656	0.0507066
GO	positive regulation of leukocyte proliferation	9	106	0.0512786
GO	carbohydrate derivative transport	5	45	0.0518134
GO	aspartate family amino acid biosynthetic process	3	19	0.0523379
GO	glycoside metabolic process	3	19	0.0523379
GO	acyl-CoA biosynthetic process	3	19	0.0523379
GO	thioester biosynthetic process	3	19	0.0523379
GO	organophosphate ester transmembrane transporter activity	3	19	0.0523379
GO	fluid transport	3	19	0.0523379
GO	ATPase activity, coupled to transmembrane movement of ions, rotational mechanism	3	19	0.0523379
GO	proton-transporting ATPase activity, rotational mechanism	3	19	0.0523379
GO	regulation of fibroblast apoptotic process	3	19	0.0523379
GO	proton-exporting ATPase activity, phosphorylative mechanism	3	19	0.0523379
GO	epithelial tube branching involved in lung morphogenesis	3	19	0.0523379
GO	response to vitamin	3	19	0.0523379
GO	amyloid-beta metabolic process	3	19	0.0523379
GO	membrane protein ectodomain proteolysis	3	19	0.0523379
GO	Golgi membrane	14	191	0.0525761
GO	intrinsic component of endoplasmic reticulum membrane	10	123	0.0528243
GO	positive regulation of lipid localization	7	75	0.0531242
GO	aspartate family amino acid metabolic process	4	32	0.0551101
GO	cellular modified amino acid biosynthetic process	4	32	0.0551101
GO	transition metal ion transmembrane transporter activity	4	32	0.0551101
GO	G-protein alpha-subunit binding	4	32	0.0551101
GO	copper ion binding	5	46	0.0560595
GO	membrane raft	20	301	0.0567387
GO	ribonuclease activity	8	92	0.0570169
GO	negative regulation of protein secretion	8	92	0.0570169
GO	receptor ligand activity	19	283	0.0571863
GO	BMP signaling pathway	6	61	0.0573781
GO	positive regulation of phagocytosis	6	61	0.0573781
GO	negative regulation of immune response	10	125	0.0577314
GO	membrane protein complex	51	900	0.0581673
GO	membrane microdomain	20	302	0.0583071
GO	secretory vesicle	23	358	0.0590263
GO	ribose phosphate metabolic process	16	230	0.0593312
GO	steroid metabolic process	13	177	0.0594389
GO	purine ribonucleotide catabolic process	3	20	0.0595697
GO	ribonucleotide catabolic process	3	20	0.0595697
GO	apoptotic cell clearance	3	20	0.0595697
GO	positive regulation of lipid storage	3	20	0.0595697
GO	transepithelial transport	3	20	0.0595697
GO	mating behavior	3	20	0.0595697
GO	lysophospholipase activity	3	20	0.0595697
GO	catalytic activity, acting on a glycoprotein	3	20	0.0595697
GO	programmed necrotic cell death	3	20	0.0595697
GO	benzene-containing compound metabolic process	3	20	0.0595697
GO	hydrolase activity, hydrolyzing O-glycosyl compounds	7	77	0.0596659
GO	response to topologically incorrect protein	7	77	0.0596659
GO	calcium-dependent phospholipase A2 activity	2	9	0.0597921
GO	purine nucleobase biosynthetic process	2	9	0.0597921
GO	acetyl-CoA C-acyltransferase activity	2	9	0.0597921
GO	nitric oxide mediated signal transduction	2	9	0.0597921
GO	aerobic electron transport chain	2	9	0.0597921
GO	mitochondrial electron transport, cytochrome c to oxygen	2	9	0.0597921
GO	mitochondrial respiratory chain complex IV	2	9	0.0597921
GO	glucocorticoid metabolic process	2	9	0.0597921
GO	dolichyl-phosphate-mannose-protein mannosyltransferase activity	2	9	0.0597921
GO	dendritic spine neck	2	9	0.0597921
GO	membranous septum morphogenesis	2	9	0.0597921
GO	purine nucleotide transport	2	9	0.0597921
GO	selenium binding	2	9	0.0597921
GO	insulin metabolic process	2	9	0.0597921
GO	diterpenoid biosynthetic process	2	9	0.0597921
GO	retinoic acid biosynthetic process	2	9	0.0597921
GO	response to stimulus involved in regulation of muscle adaptation	2	9	0.0597921
GO	establishment of centrosome localization	2	9	0.0597921
GO	regulation of ligase activity	2	9	0.0597921
GO	arachidonic acid monooxygenase activity	2	9	0.0597921
GO	macromolecule depalmitoylation	2	9	0.0597921
GO	protein depalmitoylation	2	9	0.0597921
GO	iron coordination entity transport	2	9	0.0597921
GO	N-acetyllactosaminide beta-1,3-N-acetylglucosaminyltransferase activity	2	9	0.0597921
GO	dipeptidyl-peptidase activity	2	9	0.0597921
GO	second-messenger-mediated signaling	14	195	0.0604141
GO	regulation of myotube differentiation	5	47	0.0605
GO	response to ischemia	4	33	0.060556
GO	epithelial tube formation	4	33	0.060556
GO	presynaptic active zone	4	33	0.060556
GO	cellular divalent inorganic cation homeostasis	22	341	0.0614736
GO	secondary active transmembrane transporter activity	13	178	0.061601
GO	hydrolase activity, acting on glycosyl bonds	9	110	0.0620538
GO	purine nucleotide biosynthetic process	9	110	0.0620538
GO	signaling receptor activator activity	19	286	0.0621741
GO	heterocycle catabolic process	17	250	0.0630031
GO	drug binding	8	94	0.0631429
GO	negative regulation of transferase activity	16	233	0.065072
GO	regulation of antigen receptor-mediated signaling pathway	5	48	0.0651345
GO	antigen processing and presentation of peptide antigen	5	48	0.0651345
GO	intrinsic component of synaptic vesicle membrane	5	48	0.0651345
GO	cargo receptor activity	6	63	0.0651867
GO	cellular calcium ion homeostasis	21	325	0.0656533
GO	oxidoreductase activity, acting on paired donors, with incorporation or reduction of molecular oxygen, NAD(P)H as one donor, and incorporation of one atom of oxygen	4	34	0.0662759
GO	negative regulation of lymphocyte apoptotic process	4	34	0.0662759
GO	localization	167	3318	0.0665507
GO	intracellular	28	458	0.066952
GO	purine nucleobase metabolic process	3	21	0.0672419
GO	sensory perception of taste	3	21	0.0672419
GO	negative regulation of oxidoreductase activity	3	21	0.0672419
GO	glial cell migration	3	21	0.0672419
GO	viral entry into host cell	3	21	0.0672419
GO	cell-cell adhesion mediator activity	3	21	0.0672419
GO	glutamate metabolic process	3	21	0.0672419
GO	CoA hydrolase activity	3	21	0.0672419
GO	unsaturated fatty acid metabolic process	6	64	0.0693129
GO	response to retinoic acid	6	64	0.0693129
GO	lipase activity	8	96	0.0696639
GO	positive regulation of peptide hormone secretion	8	96	0.0696639
GO	integral component of Golgi membrane	5	49	0.069962
GO	hydro-lyase activity	5	49	0.069962
GO	organophosphate ester transport	7	80	0.0703676
GO	ATPase binding	7	80	0.0703676
GO	membrane-bounded organelle	420	8837	0.0712443
GO	cysteine-type endopeptidase regulator activity involved in apoptotic process	4	35	0.072266
GO	mitochondrial translation	4	35	0.072266
GO	nucleobase catabolic process	2	10	0.0725489
GO	methionine biosynthetic process	2	10	0.0725489
GO	ketone catabolic process	2	10	0.0725489
GO	negative regulation of hormone metabolic process	2	10	0.0725489
GO	fatty acid beta-oxidation using acyl-CoA dehydrogenase	2	10	0.0725489
GO	peptidyl-proline hydroxylation to 4-hydroxy-L-proline	2	10	0.0725489
GO	aldehyde-lyase activity	2	10	0.0725489
GO	dihydrolipoyl dehydrogenase complex	2	10	0.0725489
GO	regulation of sequestering of triglyceride	2	10	0.0725489
GO	grooming behavior	2	10	0.0725489
GO	phasic smooth muscle contraction	2	10	0.0725489
GO	negative regulation of acute inflammatory response	2	10	0.0725489
GO	gap junction channel activity	2	10	0.0725489
GO	aspartate family amino acid catabolic process	2	10	0.0725489
GO	oxaloacetate metabolic process	2	10	0.0725489
GO	reproduction	2	10	0.0725489
GO	nucleotide receptor activity	2	10	0.0725489
GO	purinergic nucleotide receptor activity	2	10	0.0725489
GO	intercellular canaliculus	2	10	0.0725489
GO	maintenance of gastrointestinal epithelium	2	10	0.0725489
GO	racemase and epimerase activity, acting on carbohydrates and derivatives	2	10	0.0725489
GO	regulation of cardiac epithelial to mesenchymal transition	2	10	0.0725489
GO	oxidoreductase activity, acting on a sulfur group of donors, NAD(P) as acceptor	2	10	0.0725489
GO	poly-N-acetyllactosamine biosynthetic process	2	10	0.0725489
GO	poly-N-acetyllactosamine metabolic process	2	10	0.0725489
GO	heparan sulfate sulfotransferase activity	2	10	0.0725489
GO	acyl-CoA dehydrogenase activity	2	10	0.0725489
GO	extrinsic component of endosome membrane	2	10	0.0725489
GO	transferrin receptor binding	2	10	0.0725489
GO	Lys63-specific deubiquitinase activity	2	10	0.0725489
GO	plasma membrane raft	8	97	0.0730733
GO	Golgi apparatus subcompartment	16	237	0.0732943
GO	nucleoside diphosphate metabolic process	6	65	0.0735868
GO	microvillus	6	65	0.0735868
GO	response to ketone	7	81	0.0741729
GO	extracellular matrix	22	349	0.0747339
GO	positive regulation of epithelial cell differentiation	5	50	0.0749813
GO	amyloid-beta binding	5	50	0.0749813
GO	ketone biosynthetic process	3	22	0.0753384
GO	regulation of protein exit from endoplasmic reticulum	3	22	0.0753384
GO	response to copper ion	3	22	0.0753384
GO	hexose biosynthetic process	3	22	0.0753384
GO	entry into host	3	22	0.0753384
GO	positive regulation of long-term synaptic potentiation	3	22	0.0753384
GO	DNA catabolic process	3	22	0.0753384
GO	antigen processing and presentation of exogenous peptide antigen	3	22	0.0753384
GO	positive regulation of syncytium formation by plasma membrane fusion	3	22	0.0753384
GO	necrotic cell death	3	22	0.0753384
GO	retinoid X receptor binding	3	22	0.0753384
GO	membrane region	20	312	0.0756793
GO	ribonucleotide metabolic process	15	220	0.0758528
GO	nucleotide biosynthetic process	11	149	0.0762925
GO	metal ion homeostasis	28	465	0.0773877
GO	receptor regulator activity	20	313	0.0775893
GO	negative regulation of ERK1 and ERK2 cascade	6	66	0.0780078
GO	respiratory electron transport chain	6	66	0.0780078
GO	regulation of transmembrane receptor protein serine/threonine kinase signaling pathway	13	185	0.0782061
GO	cellular metal ion homeostasis	25	408	0.0783232
GO	regulation of calcium ion transport	14	203	0.078368
GO	integral component of mitochondrial inner membrane	4	36	0.0785216
GO	response to external stimulus	64	1184	0.0792515
GO	nitrogen compound metabolic process	245	5016	0.0801023
GO	intrinsic component of Golgi membrane	5	51	0.0801906
GO	exonuclease activity, active with either ribo- or deoxyribonucleic acids and producing 5'-phosphomonoesters	5	51	0.0801906
GO	integral component of endoplasmic reticulum membrane	9	116	0.0807418
GO	cation homeostasis	31	526	0.0818107
GO	response to external biotic stimulus	44	783	0.0822819
GO	phenol-containing compound metabolic process	6	67	0.0825753
GO	response to unfolded protein	6	67	0.0825753
GO	regulation of hormone biosynthetic process	3	23	0.0838418
GO	glucuronosyltransferase activity	3	23	0.0838418
GO	phospholipase A2 activity	3	23	0.0838418
GO	vasodilation	3	23	0.0838418
GO	cysteine-type endopeptidase inhibitor activity involved in apoptotic process	3	23	0.0838418
GO	negative regulation of T cell apoptotic process	3	23	0.0838418
GO	dopamine receptor binding	3	23	0.0838418
GO	host cell part	3	23	0.0838418
GO	host cellular component	3	23	0.0838418
GO	misfolded protein binding	3	23	0.0838418
GO	homotypic cell-cell adhesion	4	37	0.0850375
GO	intrinsic component of mitochondrial inner membrane	4	37	0.0850375
GO	disulfide oxidoreductase activity	4	37	0.0850375
GO	sulfotransferase activity	4	37	0.0850375
GO	solute:sodium symporter activity	5	52	0.085588
GO	protein homotetramerization	5	52	0.085588
GO	transferase activity, transferring hexosyl groups	12	170	0.0858891
GO	quaternary ammonium group transport	2	11	0.086082
GO	pyrimidine nucleobase metabolic process	2	11	0.086082
GO	regulation of vitamin metabolic process	2	11	0.086082
GO	lipoprotein transport	2	11	0.086082
GO	oxidoreductase activity, acting on a sulfur group of donors, disulfide as acceptor	2	11	0.086082
GO	peptidyl-proline dioxygenase activity	2	11	0.086082
GO	heart trabecula formation	2	11	0.086082
GO	positive regulation of macrophage derived foam cell differentiation	2	11	0.086082
GO	mitochondrial electron transport, ubiquinol to cytochrome c	2	11	0.086082
GO	single-stranded DNA endodeoxyribonuclease activity	2	11	0.086082
GO	negative regulation of voltage-gated calcium channel activity	2	11	0.086082
GO	regulation of high voltage-gated calcium channel activity	2	11	0.086082
GO	regulation of humoral immune response mediated by circulating immunoglobulin	2	11	0.086082
GO	positive regulation of natural killer cell differentiation	2	11	0.086082
GO	symbiont-containing vacuole membrane	2	11	0.086082
GO	connexin complex	2	11	0.086082
GO	cardiac left ventricle morphogenesis	2	11	0.086082
GO	embryonic digestive tract development	2	11	0.086082
GO	negative regulation of glycoprotein biosynthetic process	2	11	0.086082
GO	inward rectifier potassium channel activity	2	11	0.086082
GO	endoplasmic reticulum chaperone complex	2	11	0.086082
GO	ceramide transport	2	11	0.086082
GO	drug transport	2	11	0.086082
GO	uterus development	2	11	0.086082
GO	histone deacetylase activity (H3-K14 specific)	2	11	0.086082
GO	NAD-dependent histone deacetylase activity (H3-K14 specific)	2	11	0.086082
GO	secondary palate development	2	11	0.086082
GO	chondroitin sulfate biosynthetic process	2	11	0.086082
GO	acylglycerol lipase activity	2	11	0.086082
GO	anchored component of membrane	10	135	0.0866618
GO	protein homodimerization activity	33	569	0.0877775
GO	calcium ion homeostasis	21	337	0.0878098
GO	cellular homeostasis	37	648	0.0879414
GO	organelle subcompartment	17	262	0.0880203
GO	response to organic substance	86	1646	0.0883452
GO	6-phosphogluconolactonase activity	1	2	0.0886179
GO	glucose-6-phosphate dehydrogenase activity	1	2	0.0886179
GO	thymine catabolic process	1	2	0.0886179
GO	thymine metabolic process	1	2	0.0886179
GO	cellular response to prostaglandin D stimulus	1	2	0.0886179
GO	negative regulation of isoprenoid metabolic process	1	2	0.0886179
GO	phenanthrene 9,10-monooxygenase activity	1	2	0.0886179
GO	regulation of retinoic acid biosynthetic process	1	2	0.0886179
GO	response to prostaglandin D	1	2	0.0886179
GO	testosterone biosynthetic process	1	2	0.0886179
GO	regulation of non-membrane spanning protein tyrosine kinase activity	1	2	0.0886179
GO	negative regulation of eye photoreceptor cell development	1	2	0.0886179
GO	regulation of eye photoreceptor cell development	1	2	0.0886179
GO	retinal cone cell apoptotic process	1	2	0.0886179
GO	thyroid hormone catabolic process	1	2	0.0886179
GO	thyroxine 5-deiodinase activity	1	2	0.0886179
GO	10-formyltetrahydrofolate biosynthetic process	1	2	0.0886179
GO	aromatic amino acid family biosynthetic process	1	2	0.0886179
GO	formate-tetrahydrofolate ligase activity	1	2	0.0886179
GO	histidine biosynthetic process	1	2	0.0886179
GO	trimming of terminal mannose on B branch	1	2	0.0886179
GO	integrin alpha1-beta1 complex	1	2	0.0886179
GO	UDP-galactose transmembrane transport	1	2	0.0886179
GO	peptide-methionine (S)-S-oxide reductase activity	1	2	0.0886179
GO	isoleucine catabolic process	1	2	0.0886179
GO	isoleucine metabolic process	1	2	0.0886179
GO	propionyl-CoA carboxylase activity	1	2	0.0886179
GO	endonucleolytic cleavage involved in tRNA processing	1	2	0.0886179
GO	tRNA 3'-trailer cleavage, endonucleolytic	1	2	0.0886179
GO	female meiosis sister chromatid cohesion	1	2	0.0886179
GO	Rad51C-XRCC3 complex	1	2	0.0886179
GO	acetaldehyde metabolic process	1	2	0.0886179
GO	fatty alcohol metabolic process	1	2	0.0886179
GO	phytol metabolic process	1	2	0.0886179
GO	fructose-bisphosphate aldolase activity	1	2	0.0886179
GO	cellular response to water deprivation	1	2	0.0886179
GO	integral component of endosome membrane	1	2	0.0886179
GO	intracellular canaliculus	1	2	0.0886179
GO	arginase activity	1	2	0.0886179
GO	arginine catabolic process to ornithine	1	2	0.0886179
GO	negative regulation of macrophage inflammatory protein 1 alpha production	1	2	0.0886179
GO	regulation of activated CD8-positive, alpha-beta T cell apoptotic process	1	2	0.0886179
GO	ATF1-ATF4 transcription factor complex	1	2	0.0886179
GO	CHOP-ATF3 complex	1	2	0.0886179
GO	copper-transporting ATPase activity	1	2	0.0886179
GO	extraocular skeletal muscle development	1	2	0.0886179
GO	regulation of erythrocyte aggregation	1	2	0.0886179
GO	regulation of T cell homeostatic proliferation	1	2	0.0886179
GO	acylglycerol transport	1	2	0.0886179
GO	positive regulation of blood microparticle formation	1	2	0.0886179
GO	regulation of blood microparticle formation	1	2	0.0886179
GO	triglyceride transport	1	2	0.0886179
GO	regulation of glucosylceramidase activity	1	2	0.0886179
GO	guanosine-diphosphatase activity	1	2	0.0886179
GO	phosphagen biosynthetic process	1	2	0.0886179
GO	phosphagen metabolic process	1	2	0.0886179
GO	phosphocreatine biosynthetic process	1	2	0.0886179
GO	phosphocreatine metabolic process	1	2	0.0886179
GO	CSF1-CSF1R complex	1	2	0.0886179
GO	osteoclast proliferation	1	2	0.0886179
GO	C-22 sterol desaturase activity	1	2	0.0886179
GO	diterpenoid catabolic process	1	2	0.0886179
GO	retinoic acid catabolic process	1	2	0.0886179
GO	dopamine neurotransmitter receptor activity	1	2	0.0886179
GO	sensitization	1	2	0.0886179
GO	D-amino acid transmembrane transporter activity	1	2	0.0886179
GO	D-serine transport	1	2	0.0886179
GO	negative regulation of transforming growth factor-beta secretion	1	2	0.0886179
GO	Fc-gamma receptor signaling pathway involved in phagocytosis	1	2	0.0886179
GO	IgG receptor activity	1	2	0.0886179
GO	immune response-regulating cell surface receptor signaling pathway involved in phagocytosis	1	2	0.0886179
GO	cholesterol monooxygenase (side-chain-cleaving) activity	1	2	0.0886179
GO	NADPH-adrenodoxin reductase activity	1	2	0.0886179
GO	fibroblast growth factor receptor signaling pathway involved in orbitofrontal cortex development	1	2	0.0886179
GO	mesenchymal cell proliferation involved in lung development	1	2	0.0886179
GO	orbitofrontal cortex development	1	2	0.0886179
GO	prostate epithelial cord elongation	1	2	0.0886179
GO	prostate gland morphogenetic growth	1	2	0.0886179
GO	squamous basal epithelial stem cell differentiation involved in prostate gland acinus development	1	2	0.0886179
GO	positive regulation of osteoclast proliferation	1	2	0.0886179
GO	cellular response to vitamin K	1	2	0.0886179
GO	macrophage cytokine production	1	2	0.0886179
GO	negative regulation of interleukin-1 secretion	1	2	0.0886179
GO	negative regulation of oligodendrocyte apoptotic process	1	2	0.0886179
GO	oxidoreductase activity, acting on the CH-NH2 group of donors, NAD or NADP as acceptor	1	2	0.0886179
GO	response to aluminum ion	1	2	0.0886179
GO	glutamate catabolic process to 2-oxoglutarate	1	2	0.0886179
GO	glutamate catabolic process to aspartate	1	2	0.0886179
GO	phosphatidylserine decarboxylase activity	1	2	0.0886179
GO	negative regulation of peroxidase activity	1	2	0.0886179
GO	beta-N-acetylglucosaminidase activity	1	2	0.0886179
GO	male courtship behavior	1	2	0.0886179
GO	hydroxymethylglutaryl-CoA lyase activity	1	2	0.0886179
GO	ketone body biosynthetic process	1	2	0.0886179
GO	adenine salvage	1	2	0.0886179
GO	GMP catabolic process	1	2	0.0886179
GO	hypoxanthine salvage	1	2	0.0886179
GO	purine phosphoribosyltransferase activity	1	2	0.0886179
GO	11-beta-hydroxysteroid dehydrogenase [NAD(P)] activity	1	2	0.0886179
GO	glucocorticoid catabolic process	1	2	0.0886179
GO	cellular response to leptomycin B	1	2	0.0886179
GO	response to leptomycin B	1	2	0.0886179
GO	interleukin-2-mediated signaling pathway	1	2	0.0886179
GO	interleukin-7 receptor binding	1	2	0.0886179
GO	inositol-1,4-bisphosphate 1-phosphatase activity	1	2	0.0886179
GO	temperature-gated cation channel activity	1	2	0.0886179
GO	integral component of autophagosome membrane	1	2	0.0886179
GO	intrinsic component of autophagosome membrane	1	2	0.0886179
GO	lysosomal matrix	1	2	0.0886179
GO	protein targeting to lysosome involved in chaperone-mediated autophagy	1	2	0.0886179
GO	leukemia inhibitory factor receptor activity	1	2	0.0886179
GO	2-oxobutyrate metabolic process	1	2	0.0886179
GO	adaptation of rhodopsin mediated signaling	1	2	0.0886179
GO	L-malate dehydrogenase activity	1	2	0.0886179
GO	trans-synaptic signaling by BDNF, modulating synaptic transmission	1	2	0.0886179
GO	trans-synaptic signaling by BDNF	1	2	0.0886179
GO	trans-synaptic signaling by neuropeptide, modulating synaptic transmission	1	2	0.0886179
GO	trans-synaptic signaling by neuropeptide	1	2	0.0886179
GO	kidney field specification	1	2	0.0886179
GO	negative regulation of apoptotic process involved in metanephric collecting duct development	1	2	0.0886179
GO	negative regulation of apoptotic process involved in metanephric nephron tubule development	1	2	0.0886179
GO	negative regulation of mesenchymal cell apoptotic process involved in metanephric nephron morphogenesis	1	2	0.0886179
GO	pattern specification involved in pronephros development	1	2	0.0886179
GO	positive regulation of metanephric DCT cell differentiation	1	2	0.0886179
GO	pronephric field specification	1	2	0.0886179
GO	regulation of apoptotic process involved in metanephric collecting duct development	1	2	0.0886179
GO	regulation of apoptotic process involved in metanephric nephron tubule development	1	2	0.0886179
GO	regulation of mesenchymal cell apoptotic process involved in metanephric nephron morphogenesis	1	2	0.0886179
GO	regulation of metanephric DCT cell differentiation	1	2	0.0886179
GO	regulation of thyroid-stimulating hormone secretion	1	2	0.0886179
GO	establishment of blood-retinal barrier	1	2	0.0886179
GO	glycoside transport	1	2	0.0886179
GO	positive regulation of establishment of Sertoli cell barrier	1	2	0.0886179
GO	negative regulation of arachidonic acid secretion	1	2	0.0886179
GO	purine deoxyribonucleoside catabolic process	1	2	0.0886179
GO	DNA replication proofreading	1	2	0.0886179
GO	D4 dopamine receptor binding	1	2	0.0886179
GO	mast cell secretory granule organization	1	2	0.0886179
GO	proline catabolic process to glutamate	1	2	0.0886179
GO	azurophil granule lumen	1	2	0.0886179
GO	mature conventional dendritic cell differentiation	1	2	0.0886179
GO	UFM1 hydrolase activity	1	2	0.0886179
GO	negative regulation of caveolin-mediated endocytosis	1	2	0.0886179
GO	prominosome	1	2	0.0886179
GO	membrane raft distribution	1	2	0.0886179
GO	positive regulation of protein tyrosine phosphatase activity	1	2	0.0886179
GO	immunoglobulin transcytosis in epithelial cells mediated by polymeric immunoglobulin receptor	1	2	0.0886179
GO	immunoglobulin transcytosis in epithelial cells	1	2	0.0886179
GO	alcohol transmembrane transporter activity	1	2	0.0886179
GO	female genitalia morphogenesis	1	2	0.0886179
GO	retinol transmembrane transporter activity	1	2	0.0886179
GO	ribonucleoside-diphosphate reductase complex	1	2	0.0886179
GO	ryanodine-sensitive calcium-release channel activity	1	2	0.0886179
GO	fructose biosynthetic process	1	2	0.0886179
GO	sorbitol metabolic process	1	2	0.0886179
GO	positive regulation of inhibitory synapse assembly	1	2	0.0886179
GO	glucocorticoid mediated signaling pathway	1	2	0.0886179
GO	AMP transmembrane transporter activity	1	2	0.0886179
GO	coenzyme A transmembrane transporter activity	1	2	0.0886179
GO	FAD transmembrane transporter activity	1	2	0.0886179
GO	regulation of estradiol secretion	1	2	0.0886179
GO	positive regulation of male mating behavior	1	2	0.0886179
GO	succinate-CoA ligase (GDP-forming) activity	1	2	0.0886179
GO	succinate-CoA ligase complex (GDP-forming)	1	2	0.0886179
GO	succinate-semialdehyde dehydrogenase (NAD+) activity	1	2	0.0886179
GO	succinate-semialdehyde dehydrogenase [NAD(P)+] activity	1	2	0.0886179
GO	8-oxo-dGTP phosphohydrolase activity	1	2	0.0886179
GO	lithium ion binding	1	2	0.0886179
GO	pyridoxal phosphate biosynthetic process	1	2	0.0886179
GO	vitamin B6 biosynthetic process	1	2	0.0886179
GO	inositol phosphorylation	1	2	0.0886179
GO	cardioblast differentiation	1	2	0.0886179
GO	positive regulation of activation-induced cell death of T cells	1	2	0.0886179
GO	positive regulation of cardioblast differentiation	1	2	0.0886179
GO	regulation of apoptotic process involved in outflow tract morphogenesis	1	2	0.0886179
GO	detection of hypoxia	1	2	0.0886179
GO	de novo' GDP-L-fucose biosynthetic process	1	2	0.0886179
GO	isopeptide cross-linking	1	2	0.0886179
GO	G1 to G0 transition involved in cell differentiation	1	2	0.0886179
GO	regulation of muscle filament sliding speed	1	2	0.0886179
GO	UDP-glucuronate metabolic process	1	2	0.0886179
GO	D3 vitamins binding	1	2	0.0886179
GO	lithocholic acid binding	1	2	0.0886179
GO	positive regulation of vitamin D 24-hydroxylase activity	1	2	0.0886179
GO	regulation of vitamin D 24-hydroxylase activity	1	2	0.0886179
GO	vitamin D receptor signaling pathway	1	2	0.0886179
GO	negative regulation of ATF6-mediated unfolded protein response	1	2	0.0886179
GO	positive regulation of single strand break repair	1	2	0.0886179
GO	regulation of single strand break repair	1	2	0.0886179
GO	heme export	1	2	0.0886179
GO	cadmium ion binding	1	2	0.0886179
GO	acetyl-CoA C-myristoyltransferase activity	1	2	0.0886179
GO	interferon-gamma biosynthetic process	1	2	0.0886179
GO	negative regulation of growth hormone receptor signaling pathway	1	2	0.0886179
GO	reduction of food intake in response to dietary excess	1	2	0.0886179
GO	regulation of endocannabinoid signaling pathway	1	2	0.0886179
GO	3'-phosphoadenosine 5'-phosphosulfate biosynthetic process	1	2	0.0886179
GO	adenylylsulfate kinase activity	1	2	0.0886179
GO	purine ribonucleoside bisphosphate biosynthetic process	1	2	0.0886179
GO	sulfate adenylyltransferase (ATP) activity	1	2	0.0886179
GO	sulfate adenylyltransferase activity	1	2	0.0886179
GO	cGMP-stimulated cyclic-nucleotide phosphodiesterase activity	1	2	0.0886179
GO	creatine transmembrane transporter activity	1	2	0.0886179
GO	creatine transmembrane transport	1	2	0.0886179
GO	regulation of cyclic nucleotide-gated ion channel activity	1	2	0.0886179
GO	iron import into the mitochondrion	1	2	0.0886179
GO	biotinidase activity	1	2	0.0886179
GO	septate junction	1	2	0.0886179
GO	purine nucleoside transmembrane transporter activity	1	2	0.0886179
GO	purine nucleoside transmembrane transport	1	2	0.0886179
GO	endopeptidase Clp complex	1	2	0.0886179
GO	vitamin K biosynthetic process	1	2	0.0886179
GO	positive regulation of nucleotide-binding oligomerization domain containing 1 signaling pathway	1	2	0.0886179
GO	piRNA binding	1	2	0.0886179
GO	2-polyprenyl-6-methoxy-1,4-benzoquinone methyltransferase activity	1	2	0.0886179
GO	quinone cofactor methyltransferase activity	1	2	0.0886179
GO	cytoplasmic side of mitochondrial outer membrane	1	2	0.0886179
GO	positive regulation of testosterone secretion	1	2	0.0886179
GO	T cell tolerance induction	1	2	0.0886179
GO	DNA strand resection involved in replication fork processing	1	2	0.0886179
GO	progesterone biosynthetic process	1	2	0.0886179
GO	vesicle tethering to endoplasmic reticulum	1	2	0.0886179
GO	glycoprotein-N-acetylgalactosamine 3-beta-galactosyltransferase activity	1	2	0.0886179
GO	O-glycan processing, core 1	1	2	0.0886179
GO	platelet morphogenesis	1	2	0.0886179
GO	asparaginase activity	1	2	0.0886179
GO	asparagine catabolic process	1	2	0.0886179
GO	error-free postreplication DNA repair	1	2	0.0886179
GO	UBC13-UEV1A complex	1	2	0.0886179
GO	creatine biosynthetic process	1	2	0.0886179
GO	creatine metabolic process	1	2	0.0886179
GO	fatty acid amide hydrolase activity	1	2	0.0886179
GO	UFM1 transferase activity	1	2	0.0886179
GO	ceramide phosphoethanolamine biosynthetic process	1	2	0.0886179
GO	ceramide phosphoethanolamine metabolic process	1	2	0.0886179
GO	alkenylglycerophosphocholine hydrolase activity	1	2	0.0886179
GO	alkenylglycerophosphoethanolamine hydrolase activity	1	2	0.0886179
GO	bombesin receptor binding	1	2	0.0886179
GO	acetate biosynthetic process	1	2	0.0886179
GO	propionate biosynthetic process	1	2	0.0886179
GO	manganese-transporting ATPase activity	1	2	0.0886179
GO	flavonoid binding	1	2	0.0886179
GO	L-kynurenine metabolic process	1	2	0.0886179
GO	mitochondrial pyruvate transmembrane transport	1	2	0.0886179
GO	mitochondria-nucleus signaling pathway	1	2	0.0886179
GO	pyrimidine nucleotide import into mitochondrion	1	2	0.0886179
GO	pyrimidine nucleotide transmembrane transporter activity	1	2	0.0886179
GO	pyrimidine nucleotide transport	1	2	0.0886179
GO	thromboxane-A synthase activity	1	2	0.0886179
GO	axonemal central apparatus	1	2	0.0886179
GO	phosphatidylserine catabolic process	1	2	0.0886179
GO	amidase activity	1	2	0.0886179
GO	myosin head/neck binding	1	2	0.0886179
GO	negative regulation of muscle atrophy	1	2	0.0886179
GO	response to injury involved in regulation of muscle adaptation	1	2	0.0886179
GO	transketolase activity	1	2	0.0886179
GO	protein tyrosine phosphatase activity	7	85	0.0905809
GO	aminoglycan metabolic process	7	85	0.0905809
GO	Golgi-associated vesicle	7	85	0.0905809
GO	feeding behavior	5	53	0.091171
GO	peptide metabolic process	24	396	0.0912306
GO	response to oxygen-containing compound	51	931	0.0914669
GO	positive regulation of mononuclear cell proliferation	8	102	0.0916108
GO	cellular nitrogen compound catabolic process	16	245	0.091733
GO	carbohydrate derivative transmembrane transporter activity	4	38	0.091808
GO	endodeoxyribonuclease activity	4	38	0.091808
GO	regulation of T cell apoptotic process	4	38	0.091808
GO	ligand-gated ion channel activity	6	69	0.0921456
GO	negative regulation of endothelial cell apoptotic process	3	24	0.0927341
GO	peptidyl-glutamic acid modification	3	24	0.0927341
GO	protein K48-linked deubiquitination	3	24	0.0927341
GO	purine ribonucleotide metabolic process	14	209	0.0938849
GO	regulation of synapse assembly	7	86	0.0949774
GO	metallopeptidase activity	10	138	0.0967907
GO	striated muscle contraction	5	54	0.0969371
GO	acetylglucosaminyltransferase activity	5	54	0.0969371
GO	electron transport chain	6	70	0.097146
GO	regulation of peptide transport	34	595	0.097799
GO	organic substance transport	83	1594	0.098361
GO	O-acyltransferase activity	4	39	0.0988266
GO	inorganic ion homeostasis	31	537	0.0998702
GO	methionine metabolic process	2	12	0.100295
GO	lipoprotein localization	2	12	0.100295
GO	5'-nucleotidase activity	2	12	0.100295
GO	signal transduction involved in G2 DNA damage checkpoint	2	12	0.100295
GO	nucleobase biosynthetic process	2	12	0.100295
GO	regulation of retrograde protein transport, ER to cytosol	2	12	0.100295
GO	BMP receptor binding	2	12	0.100295
GO	adenine nucleotide transmembrane transporter activity	2	12	0.100295
GO	purine nucleotide transmembrane transporter activity	2	12	0.100295
GO	purine ribonucleotide transmembrane transporter activity	2	12	0.100295
GO	response to testosterone	2	12	0.100295
GO	long-chain fatty acid transporter activity	2	12	0.100295
GO	collecting duct development	2	12	0.100295
GO	regulation of cellular carbohydrate catabolic process	2	12	0.100295
GO	kinetochore assembly	2	12	0.100295
GO	regulation of apoptotic DNA fragmentation	2	12	0.100295
GO	mannose binding	2	12	0.100295
GO	transmission of nerve impulse	2	12	0.100295
GO	positive regulation of heterotypic cell-cell adhesion	2	12	0.100295
GO	branching involved in salivary gland morphogenesis	2	12	0.100295
GO	embryonic digestive tract morphogenesis	2	12	0.100295
GO	negative regulation of tumor necrosis factor-mediated signaling pathway	2	12	0.100295
GO	astrocyte projection	2	12	0.100295
GO	dicarboxylic acid catabolic process	2	12	0.100295
GO	negative regulation of glycoprotein metabolic process	2	12	0.100295
GO	regulation of amyloid precursor protein biosynthetic process	2	12	0.100295
GO	phosphatidylcholine biosynthetic process	2	12	0.100295
GO	short-chain fatty acid metabolic process	2	12	0.100295
GO	integral component of nuclear inner membrane	2	12	0.100295
GO	intrinsic component of nuclear inner membrane	2	12	0.100295
GO	regulation of response to osmotic stress	2	12	0.100295
GO	purine deoxyribonucleoside triphosphate metabolic process	2	12	0.100295
GO	terpenoid biosynthetic process	2	12	0.100295
GO	carbon-sulfur lyase activity	2	12	0.100295
GO	Golgi vesicle budding	2	12	0.100295
GO	signal peptide processing	2	12	0.100295
GO	mitochondrial genome maintenance	2	12	0.100295
GO	regulation of tumor necrosis factor production	10	139	0.100316
GO	positive regulation of protein secretion	13	193	0.1004
GO	plasma membrane region	47	858	0.101928
GO	positive regulation of natural killer cell activation	3	25	0.101996
GO	negative regulation of ERBB signaling pathway	3	25	0.101996
GO	meiosis I	3	25	0.101996
GO	hydrogen peroxide metabolic process	3	25	0.101996
GO	negative regulation of production of molecular mediator of immune response	3	25	0.101996
GO	cellular detoxification	3	25	0.101996
GO	glial cell projection	3	25	0.101996
GO	2'-deoxyribonucleotide metabolic process	3	25	0.101996
GO	deoxyribose phosphate metabolic process	3	25	0.101996
GO	UDP-glycosyltransferase activity	9	122	0.102494
GO	response to endoplasmic reticulum stress	13	194	0.103418
GO	Golgi apparatus	62	1165	0.103629
GO	regulation of phagocytosis	7	88	0.104119
GO	transition metal ion binding	44	799	0.104198
GO	organic substance biosynthetic process	86	1663	0.10519
GO	ATPase-coupled cation transmembrane transporter activity	4	40	0.106087
GO	ATPase-coupled ion transmembrane transporter activity	4	40	0.106087
GO	ATPase-coupled transmembrane transporter activity	4	40	0.106087
GO	cholesterol binding	4	40	0.106087
GO	lung alveolus development	4	40	0.106087
GO	ATPase activity, coupled to transmembrane movement of substances	4	40	0.106087
GO	ligand-gated channel activity	6	72	0.10757
GO	regulation of tumor necrosis factor superfamily cytokine production	10	141	0.107588
GO	organic anion transmembrane transporter activity	11	159	0.107829
GO	ribonucleotide biosynthetic process	8	106	0.108215
GO	amino acid transport	7	89	0.108861
GO	regulation of cold-induced thermogenesis	9	124	0.11042
GO	cellular cation homeostasis	27	464	0.110441
GO	phospholipid biosynthetic process	10	142	0.111334
GO	neutral amino acid transmembrane transporter activity	3	26	0.111608
GO	protein localization to lysosome	3	26	0.111608
GO	platelet activation	3	26	0.111608
GO	movement in host environment	3	26	0.111608
GO	positive regulation of myotube differentiation	3	26	0.111608
GO	glucosamine-containing compound metabolic process	3	26	0.111608
GO	regulation of oxidative stress-induced intrinsic apoptotic signaling pathway	3	26	0.111608
GO	mitochondrial calcium ion homeostasis	3	26	0.111608
GO	cilium assembly	13	197	0.112794
GO	caveola	6	73	0.112989
GO	nucleotide catabolic process	4	41	0.11358
GO	negative regulation of epithelial cell apoptotic process	4	41	0.11358
GO	sulfur amino acid biosynthetic process	2	13	0.115098
GO	peptidyl-proline hydroxylation	2	13	0.115098
GO	endonuclease activity, active with either ribo- or deoxyribonucleic acids and producing 3'-phosphomonoesters	2	13	0.115098
GO	negative regulation of stem cell proliferation	2	13	0.115098
GO	negative regulation of protein import into nucleus	2	13	0.115098
GO	negative regulation of protein import	2	13	0.115098
GO	cellular lipid biosynthetic process	2	13	0.115098
GO	activation of adenylate cyclase activity	2	13	0.115098
GO	guanosine-containing compound biosynthetic process	2	13	0.115098
GO	ribonucleoside catabolic process	2	13	0.115098
GO	positive regulation of endothelial cell chemotaxis	2	13	0.115098
GO	zymogen granule membrane	2	13	0.115098
GO	purine deoxyribonucleotide metabolic process	2	13	0.115098
GO	nucleoside triphosphate catabolic process	2	13	0.115098
GO	regulation of mitotic cell cycle spindle assembly checkpoint	2	13	0.115098
GO	regulation of mitotic spindle checkpoint	2	13	0.115098
GO	vesicle targeting	2	13	0.115098
GO	protein maturation by iron-sulfur cluster transfer	2	13	0.115098
GO	carbohydrate transport	5	57	0.115302
GO	response to biotic stimulus	44	807	0.116495
GO	regulation of protein transport	32	566	0.116701
GO	sphingolipid metabolic process	8	108	0.117097
GO	negative regulation of immune effector process	8	108	0.117097
GO	phosphoric ester hydrolase activity	19	312	0.118107
GO	respiratory chain complex	6	74	0.118544
GO	carboxylic acid biosynthetic process	13	199	0.119314
GO	calcium ion transport	12	181	0.120999
GO	NADP binding	4	42	0.1213
GO	response to fatty acid	4	42	0.1213
GO	pyridoxal phosphate binding	4	42	0.1213
GO	aminoglycan biosynthetic process	4	42	0.1213
GO	behavioral fear response	3	27	0.121551
GO	negative regulation of calcium ion transmembrane transport	3	27	0.121551
GO	digestive tract development	3	27	0.121551
GO	regulation of syncytium formation by plasma membrane fusion	3	27	0.121551
GO	Golgi stack	3	27	0.121551
GO	snoRNA binding	3	27	0.121551
GO	cell redox homeostasis	5	58	0.121767
GO	response to organonitrogen compound	32	569	0.1225
GO	organic acid biosynthetic process	13	200	0.122653
GO	response to organic cyclic compound	25	431	0.123898
GO	glucose metabolic process	6	75	0.124233
GO	solute:cation symporter activity	6	75	0.124233
GO	phagocytosis	6	75	0.124233
GO	positive regulation of secretion	21	353	0.124241
GO	negative regulation of cytokine production	12	182	0.124545
GO	negative regulation of protein kinase activity	12	183	0.128148
GO	transport vesicle membrane	5	59	0.128397
GO	transferase activity, transferring alkyl or aryl (other than methyl) groups	5	59	0.128397
GO	positive regulation of transmembrane receptor protein serine/threonine kinase signaling pathway	7	93	0.128952
GO	vitamin B6 binding	4	43	0.129238
GO	proline transmembrane transport	1	3	0.129941
GO	beta-alanine metabolic process	1	3	0.129941
GO	enone reductase activity	1	3	0.129941
GO	parturition	1	3	0.129941
GO	leading edge of lamellipodium	1	3	0.129941
GO	salt transmembrane transporter activity	1	3	0.129941
GO	urate transmembrane transporter activity	1	3	0.129941
GO	thyroxine 5'-deiodinase activity	1	3	0.129941
GO	methenyltetrahydrofolate cyclohydrolase activity	1	3	0.129941
GO	methylenetetrahydrofolate dehydrogenase (NAD+) activity	1	3	0.129941
GO	electron transfer flavoprotein complex	1	3	0.129941
GO	mitochondrial electron transfer flavoprotein complex	1	3	0.129941
GO	multivesicular body, internal vesicle	1	3	0.129941
GO	negative regulation of lysosomal protein catabolic process	1	3	0.129941
GO	negative regulation of protein catabolic process in the vacuole	1	3	0.129941
GO	regulation of lysosomal membrane permeability	1	3	0.129941
GO	palmitoyl-CoA oxidase activity	1	3	0.129941
GO	tRNA 3'-trailer cleavage	1	3	0.129941
GO	alcohol dehydrogenase (NAD+) activity	1	3	0.129941
GO	alcohol dehydrogenase activity, zinc-dependent	1	3	0.129941
GO	ethanol binding	1	3	0.129941
GO	ethanol oxidation	1	3	0.129941
GO	cellular response to mercury ion	1	3	0.129941
GO	cellular response to water stimulus	1	3	0.129941
GO	negative regulation of interleukin-13 secretion	1	3	0.129941
GO	regulation of L-arginine import	1	3	0.129941
GO	positive regulation of TRAIL-activated apoptotic signaling pathway	1	3	0.129941
GO	copper ion export	1	3	0.129941
GO	positive regulation of inflammatory response to wounding	1	3	0.129941
GO	positive regulation of T cell mediated immune response to tumor cell	1	3	0.129941
GO	pre-B cell differentiation	1	3	0.129941
GO	regulation of transforming growth factor beta3 production	1	3	0.129941
GO	lipoprotein particle mediated signaling	1	3	0.129941
GO	low-density lipoprotein particle mediated signaling	1	3	0.129941
GO	oleic acid binding	1	3	0.129941
GO	uridine-diphosphatase activity	1	3	0.129941
GO	positive regulation of G2/MI transition of meiotic cell cycle	1	3	0.129941
GO	regulation of G2/MI transition of meiotic cell cycle	1	3	0.129941
GO	creatine kinase activity	1	3	0.129941
GO	macrophage colony-stimulating factor receptor binding	1	3	0.129941
GO	macrophage colony-stimulating factor signaling pathway	1	3	0.129941
GO	positive regulation of cellular response to macrophage colony-stimulating factor stimulus	1	3	0.129941
GO	positive regulation of odontogenesis of dentin-containing tooth	1	3	0.129941
GO	positive regulation of response to macrophage colony-stimulating factor	1	3	0.129941
GO	regulation of macrophage colony-stimulating factor signaling pathway	1	3	0.129941
GO	regulation of AV node cell action potential	1	3	0.129941
GO	ergosterol biosynthetic process	1	3	0.129941
GO	ergosterol metabolic process	1	3	0.129941
GO	sterol desaturase activity	1	3	0.129941
GO	dolichol-phosphate-mannose synthase complex	1	3	0.129941
GO	dolichyl-phosphate beta-D-mannosyltransferase activity	1	3	0.129941
GO	conditioned taste aversion	1	3	0.129941
GO	vacuolar proton-transporting V-type ATPase, V0 domain	1	3	0.129941
GO	elastic fiber	1	3	0.129941
GO	positive regulation of substrate-dependent cell migration, cell attachment to substrate	1	3	0.129941
GO	regulation of substrate-dependent cell migration, cell attachment to substrate	1	3	0.129941
GO	regulation of transforming growth factor-beta secretion	1	3	0.129941
GO	immune complex clearance	1	3	0.129941
GO	negative regulation of hypersensitivity	1	3	0.129941
GO	branching morphogenesis of a nerve	1	3	0.129941
GO	endodermal digestive tract morphogenesis	1	3	0.129941
GO	ventricular zone neuroblast division	1	3	0.129941
GO	negative regulation of apoptotic process in bone marrow	1	3	0.129941
GO	regulation of osteoclast proliferation	1	3	0.129941
GO	fusion of virus membrane with host plasma membrane	1	3	0.129941
GO	hematopoietic stem cell migration to bone marrow	1	3	0.129941
GO	membrane fusion involved in viral entry into host cell	1	3	0.129941
GO	multi-organism membrane fusion	1	3	0.129941
GO	negative regulation of dendritic cell apoptotic process	1	3	0.129941
GO	receptor-mediated virion attachment to host cell	1	3	0.129941
GO	regulation of oligodendrocyte apoptotic process	1	3	0.129941
GO	response to vitamin K	1	3	0.129941
GO	G protein-coupled photoreceptor activity	1	3	0.129941
GO	hydroxyacylglutathione hydrolase activity	1	3	0.129941
GO	glutamate biosynthetic process	1	3	0.129941
GO	aromatic-amino-acid:2-oxoglutarate aminotransferase activity	1	3	0.129941
GO	aspartate biosynthetic process	1	3	0.129941
GO	aspartate catabolic process	1	3	0.129941
GO	fumarate metabolic process	1	3	0.129941
GO	L-aspartate:2-oxoglutarate aminotransferase activity	1	3	0.129941
GO	L-phenylalanine aminotransferase activity	1	3	0.129941
GO	L-phenylalanine:2-oxoglutarate aminotransferase activity	1	3	0.129941
GO	transdifferentiation	1	3	0.129941
GO	interleukin-17 production	1	3	0.129941
GO	epithelial cell differentiation involved in mammary gland alveolus development	1	3	0.129941
GO	midgut development	1	3	0.129941
GO	tissue migration	1	3	0.129941
GO	adenine biosynthetic process	1	3	0.129941
GO	adenine metabolic process	1	3	0.129941
GO	guanine metabolic process	1	3	0.129941
GO	hypoxanthine biosynthetic process	1	3	0.129941
GO	purine nucleobase salvage	1	3	0.129941
GO	purine ribonucleoside monophosphate catabolic process	1	3	0.129941
GO	ribonucleoside monophosphate catabolic process	1	3	0.129941
GO	membrane curvature sensor activity	1	3	0.129941
GO	prostate gland stromal morphogenesis	1	3	0.129941
GO	insulin catabolic process	1	3	0.129941
GO	ubiquitin recycling	1	3	0.129941
GO	interleukin-15 receptor activity	1	3	0.129941
GO	mechanosensitive cation channel activity	1	3	0.129941
GO	temperature-gated ion channel activity	1	3	0.129941
GO	regulation of retrograde trans-synaptic signaling by endocanabinoid	1	3	0.129941
GO	platelet dense granule membrane	1	3	0.129941
GO	protein targeting to vacuole involved in autophagy	1	3	0.129941
GO	oncostatin-M receptor activity	1	3	0.129941
GO	oncostatin-M-mediated signaling pathway	1	3	0.129941
GO	oxygen carrier activity	1	3	0.129941
GO	oxygen transport	1	3	0.129941
GO	aldehyde dehydrogenase (NADP+) activity	1	3	0.129941
GO	malate dehydrogenase (decarboxylating) (NAD+) activity	1	3	0.129941
GO	malate dehydrogenase (decarboxylating) (NADP+) activity	1	3	0.129941
GO	malic enzyme activity	1	3	0.129941
GO	neurotrophin receptor activity	1	3	0.129941
GO	synaptic signaling via neuropeptide	1	3	0.129941
GO	procollagen-proline 4-dioxygenase complex	1	3	0.129941
GO	negative regulation of dopamine receptor signaling pathway	1	3	0.129941
GO	metanephric nephron tubule formation	1	3	0.129941
GO	negative regulation of mesenchymal cell apoptotic process involved in metanephros development	1	3	0.129941
GO	positive regulation of mesenchymal to epithelial transition involved in metanephros morphogenesis	1	3	0.129941
GO	positive regulation of thyroid hormone generation	1	3	0.129941
GO	regulation of mesenchymal cell apoptotic process involved in metanephros development	1	3	0.129941
GO	regulation of thyroid hormone generation	1	3	0.129941
GO	S-shaped body morphogenesis	1	3	0.129941
GO	establishment of endothelial blood-brain barrier	1	3	0.129941
GO	drug transport across blood-brain barrier	1	3	0.129941
GO	positive regulation of anion channel activity	1	3	0.129941
GO	regulation of establishment of Sertoli cell barrier	1	3	0.129941
GO	xenobiotic transmembrane transporting ATPase activity	1	3	0.129941
GO	negative regulation of phospholipase A2 activity	1	3	0.129941
GO	purine deoxyribonucleoside metabolic process	1	3	0.129941
GO	D5 dopamine receptor binding	1	3	0.129941
GO	negative regulation of female receptivity	1	3	0.129941
GO	proline catabolic process	1	3	0.129941
GO	vacuolar protein processing	1	3	0.129941
GO	response to immobilization stress	1	3	0.129941
GO	bleb	1	3	0.129941
GO	immunoglobulin biosynthetic process	1	3	0.129941
GO	membrane raft localization	1	3	0.129941
GO	negative regulation of cell adhesion involved in substrate-bound cell migration	1	3	0.129941
GO	peptidyl-cysteine methylation	1	3	0.129941
GO	proteolysis in other organism	1	3	0.129941
GO	isoprenoid transport	1	3	0.129941
GO	retinol transport	1	3	0.129941
GO	terpenoid transport	1	3	0.129941
GO	urinary bladder development	1	3	0.129941
GO	vitamin A import	1	3	0.129941
GO	vitamin A transport	1	3	0.129941
GO	oxidoreductase activity, acting on CH or CH2 groups, disulfide as acceptor	1	3	0.129941
GO	ribonucleoside-diphosphate reductase activity, thioredoxin disulfide as acceptor	1	3	0.129941
GO	ribonucleoside-diphosphate reductase activity	1	3	0.129941
GO	calcium-induced calcium release activity	1	3	0.129941
GO	alditol catabolic process	1	3	0.129941
GO	hexitol metabolic process	1	3	0.129941
GO	regulation of inhibitory synapse assembly	1	3	0.129941
GO	selenium compound metabolic process	1	3	0.129941
GO	3-phosphoinositide-dependent protein kinase binding	1	3	0.129941
GO	androgen catabolic process	1	3	0.129941
GO	regulation of male mating behavior	1	3	0.129941
GO	succinate-CoA ligase activity	1	3	0.129941
GO	succinate-CoA ligase complex	1	3	0.129941
GO	histone H2A K63-linked deubiquitination	1	3	0.129941
GO	UDP-N-acetylglucosamine-lysosomal-enzyme N-acetylglucosaminephosphotransferase activity	1	3	0.129941
GO	negative regulation of growth rate	1	3	0.129941
GO	pyridoxal phosphate metabolic process	1	3	0.129941
GO	vitamin B6 metabolic process	1	3	0.129941
GO	endocardial cushion fusion	1	3	0.129941
GO	positive regulation of integrin biosynthetic process	1	3	0.129941
GO	positive regulation of timing of catagen	1	3	0.129941
GO	detection of oxygen	1	3	0.129941
GO	positive regulation of tight junction disassembly	1	3	0.129941
GO	regulation of tight junction disassembly	1	3	0.129941
GO	peptidyl-glutamine modification	1	3	0.129941
GO	beta-1,3-galactosyl-O-glycosyl-glycoprotein beta-1,6-N-acetylglucosaminyltransferase activity	1	3	0.129941
GO	inter-male aggressive behavior	1	3	0.129941
GO	cardiac Troponin complex	1	3	0.129941
GO	diaphragm contraction	1	3	0.129941
GO	regulation of muscle filament sliding	1	3	0.129941
GO	troponin I binding	1	3	0.129941
GO	bile acid receptor activity	1	3	0.129941
GO	bile acid signaling pathway	1	3	0.129941
GO	mammary gland branching involved in pregnancy	1	3	0.129941
GO	vitamin D response element binding	1	3	0.129941
GO	positive regulation of vascular wound healing	1	3	0.129941
GO	vascular endothelial growth factor receptor 1 binding	1	3	0.129941
GO	intestinal D-glucose absorption	1	3	0.129941
GO	intestinal hexose absorption	1	3	0.129941
GO	negative regulation of interleukin-2 secretion	1	3	0.129941
GO	terminal web assembly	1	3	0.129941
GO	regulation of ATF6-mediated unfolded protein response	1	3	0.129941
GO	negative regulation of protein ADP-ribosylation	1	3	0.129941
GO	regulation of Rab protein signal transduction	1	3	0.129941
GO	regulation of sequestering of zinc ion	1	3	0.129941
GO	glutamine catabolic process	1	3	0.129941
GO	protein N-acetylglucosaminyltransferase activity	1	3	0.129941
GO	phenylacetate catabolic process	1	3	0.129941
GO	calcium-independent cell-matrix adhesion	1	3	0.129941
GO	cellular heat acclimation	1	3	0.129941
GO	membrane repolarization during ventricular cardiac muscle cell action potential	1	3	0.129941
GO	ventricular cardiac muscle cell membrane repolarization	1	3	0.129941
GO	neuroligin family protein binding	1	3	0.129941
GO	nucleoside:sodium symporter activity	1	3	0.129941
GO	purine-containing compound transmembrane transport	1	3	0.129941
GO	L-methionine-(R)-S-oxide reductase activity	1	3	0.129941
GO	urea transmembrane transport	1	3	0.129941
GO	positive regulation of nucleotide-binding oligomerization domain containing signaling pathway	1	3	0.129941
GO	C-terminal protein methylation	1	3	0.129941
GO	protein C-terminal carboxyl O-methyltransferase activity	1	3	0.129941
GO	FFAT motif binding	1	3	0.129941
GO	regulation of testosterone secretion	1	3	0.129941
GO	myo-inositol transport	1	3	0.129941
GO	kinociliary basal body	1	3	0.129941
GO	dATP catabolic process	1	3	0.129941
GO	dGTP catabolic process	1	3	0.129941
GO	extrinsic component of postsynaptic endosome membrane	1	3	0.129941
GO	muscle cell projection membrane	1	3	0.129941
GO	dihydropyrimidinase activity	1	3	0.129941
GO	box H/ACA telomerase RNP complex	1	3	0.129941
GO	snRNA pseudouridine synthesis	1	3	0.129941
GO	extracellular vesicle biogenesis	1	3	0.129941
GO	dUDP biosynthetic process	1	3	0.129941
GO	dUDP metabolic process	1	3	0.129941
GO	pyrimidine deoxyribonucleoside diphosphate biosynthetic process	1	3	0.129941
GO	pyrimidine deoxyribonucleoside diphosphate metabolic process	1	3	0.129941
GO	pyrimidine nucleoside diphosphate biosynthetic process	1	3	0.129941
GO	pyrimidine nucleoside diphosphate metabolic process	1	3	0.129941
GO	uridylate kinase activity	1	3	0.129941
GO	ceramide cholinephosphotransferase activity	1	3	0.129941
GO	ceramide phosphoethanolamine synthase activity	1	3	0.129941
GO	sphingomyelin synthase activity	1	3	0.129941
GO	acetate metabolic process	1	3	0.129941
GO	acetate-CoA ligase activity	1	3	0.129941
GO	vacuolar proton-transporting V-type ATPase, V1 domain	1	3	0.129941
GO	sphinganine metabolic process	1	3	0.129941
GO	sphingolipid delta-4 desaturase activity	1	3	0.129941
GO	L-glutamine aminotransferase activity	1	3	0.129941
GO	pyruvate transmembrane transport	1	3	0.129941
GO	chondroitin 4-sulfotransferase activity	1	3	0.129941
GO	cerebellar granular layer development	1	3	0.129941
GO	3-beta-hydroxy-delta5-steroid dehydrogenase activity	1	3	0.129941
GO	axonemal central apparatus assembly	1	3	0.129941
GO	glutaminyl-tRNA synthase (glutamine-hydrolyzing) activity	1	3	0.129941
GO	glutaminyl-tRNAGln biosynthesis via transamidation	1	3	0.129941
GO	glutamyl-tRNA(Gln) amidotransferase complex	1	3	0.129941
GO	cytoplasmic actin-based contraction involved in cell motility	1	3	0.129941
GO	death effector domain binding	1	3	0.129941
GO	vitamin A metabolic process	1	3	0.129941
GO	transferase activity, transferring aldehyde or ketonic groups	1	3	0.129941
GO	calcium ion sensor activity	1	3	0.129941
GO	dioxygenase activity	6	76	0.130053
GO	positive regulation of B cell activation	6	76	0.130053
GO	negative regulation of T cell mediated immunity	2	14	0.13041
GO	nucleotidase activity	2	14	0.13041
GO	positive regulation of ERAD pathway	2	14	0.13041
GO	telomere maintenance via recombination	2	14	0.13041
GO	hydrogen peroxide catabolic process	2	14	0.13041
GO	cellular response to copper ion	2	14	0.13041
GO	positive regulation of endothelial cell differentiation	2	14	0.13041
GO	cellular response to low-density lipoprotein particle stimulus	2	14	0.13041
GO	regulation of DNA catabolic process	2	14	0.13041
GO	respiratory chain complex IV	2	14	0.13041
GO	retinoic acid receptor signaling pathway	2	14	0.13041
GO	behavioral response to cocaine	2	14	0.13041
GO	cerebral cortex neuron differentiation	2	14	0.13041
GO	M band	2	14	0.13041
GO	negative regulation of myotube differentiation	2	14	0.13041
GO	synaptic cleft	2	14	0.13041
GO	calcium-mediated signaling using intracellular calcium source	2	14	0.13041
GO	deoxyribonucleotide biosynthetic process	2	14	0.13041
GO	peptide hormone processing	2	14	0.13041
GO	androgen metabolic process	2	14	0.13041
GO	vitamin biosynthetic process	2	14	0.13041
GO	response to progesterone	2	14	0.13041
GO	fatty acid ligase activity	2	14	0.13041
GO	lipoprotein catabolic process	2	14	0.13041
GO	arachidonate transport	2	14	0.13041
GO	arachidonic acid secretion	2	14	0.13041
GO	memory	8	111	0.131126
GO	isomerase activity	10	147	0.131154
GO	regulation of transforming growth factor beta production	3	28	0.131803
GO	behavioral defense response	3	28	0.131803
GO	monosaccharide biosynthetic process	3	28	0.131803
GO	collagen catabolic process	3	28	0.131803
GO	antigen processing and presentation of exogenous antigen	3	28	0.131803
GO	negative regulation of extrinsic apoptotic signaling pathway via death domain receptors	3	28	0.131803
GO	regulation of keratinocyte proliferation	3	28	0.131803
GO	peptide hormone binding	3	28	0.131803
GO	tricarboxylic acid cycle	3	28	0.131803
GO	negative regulation of cardiac muscle cell apoptotic process	3	28	0.131803
GO	protein K63-linked deubiquitination	3	28	0.131803
GO	proteoglycan biosynthetic process	3	28	0.131803
GO	cellular ion homeostasis	27	474	0.131881
GO	aromatic compound catabolic process	16	260	0.133592
GO	regulation of cell junction assembly	11	166	0.133805
GO	neutrophil migration	5	60	0.135188
GO	cytoplasmic side of membrane	5	60	0.135188
GO	ribose phosphate biosynthetic process	8	112	0.135986
GO	integrin binding	8	112	0.135986
GO	metalloendopeptidase activity	6	77	0.136001
GO	protein tetramerization	6	77	0.136001
GO	cation channel activity	13	204	0.13654
GO	regulation of endothelial cell apoptotic process	4	44	0.137386
GO	negative regulation of leukocyte mediated immunity	4	44	0.137386
GO	body fluid secretion	4	44	0.137386
GO	regulation of long-term synaptic potentiation	4	44	0.137386
GO	transferase activity, transferring pentosyl groups	4	44	0.137386
GO	phosphorus metabolic process	74	1440	0.13788
GO	glycosyl compound metabolic process	7	95	0.139647
GO	channel regulator activity	7	95	0.139647
GO	cell adhesion molecule binding	14	224	0.140446
GO	negative regulation of leukocyte cell-cell adhesion	8	113	0.140936
GO	regulation of B cell activation	8	113	0.140936
GO	phospholipase activity	6	78	0.142075
GO	regulation of oxidoreductase activity	6	78	0.142075
GO	carbon-oxygen lyase activity	5	61	0.142135
GO	secretory granule membrane	5	61	0.142135
GO	cellular response to fatty acid	3	29	0.142345
GO	regulation of alpha-beta T cell proliferation	3	29	0.142345
GO	regulation of B cell differentiation	3	29	0.142345
GO	nucleotide-sugar metabolic process	3	29	0.142345
GO	ion transmembrane transporter activity, phosphorylative mechanism	3	29	0.142345
GO	oligosaccharide metabolic process	3	29	0.142345
GO	perinuclear region of cytoplasm	32	579	0.143111
GO	regulation of leukocyte proliferation	12	187	0.143133
GO	phosphate-containing compound metabolic process	73	1423	0.143233
GO	cell projection membrane	15	244	0.143675
GO	proton transmembrane transporter activity	7	96	0.145152
GO	protein dimerization activity	42	783	0.145438
GO	regulation of extrinsic apoptotic signaling pathway via death domain receptors	4	45	0.145735
GO	calcium channel complex	4	45	0.145735
GO	regulation of filopodium assembly	4	45	0.145735
GO	neurotransmitter transmembrane transporter activity	2	15	0.146153
GO	neurotransmitter:sodium symporter activity	2	15	0.146153
GO	C-acyltransferase activity	2	15	0.146153
GO	bile acid and bile salt transport	2	15	0.146153
GO	cellular copper ion homeostasis	2	15	0.146153
GO	positive regulation of alpha-beta T cell proliferation	2	15	0.146153
GO	response to hydroperoxide	2	15	0.146153
GO	Toll-like receptor binding	2	15	0.146153
GO	positive regulation of hormone metabolic process	2	15	0.146153
GO	long-term synaptic depression	2	15	0.146153
GO	excretion	2	15	0.146153
GO	N-acetylglucosamine metabolic process	2	15	0.146153
GO	purine nucleoside monophosphate biosynthetic process	2	15	0.146153
GO	purine ribonucleoside monophosphate biosynthetic process	2	15	0.146153
GO	delayed rectifier potassium channel activity	2	15	0.146153
GO	intramolecular oxidoreductase activity, transposing S-S bonds	2	15	0.146153
GO	protein disulfide isomerase activity	2	15	0.146153
GO	negative regulation of multicellular organism growth	2	15	0.146153
GO	alpha-beta T cell differentiation involved in immune response	2	15	0.146153
GO	CD4-positive, alpha-beta T cell differentiation involved in immune response	2	15	0.146153
GO	T-helper cell differentiation	2	15	0.146153
GO	signaling receptor ligand precursor processing	2	15	0.146153
GO	NAD-dependent histone deacetylase activity	2	15	0.146153
GO	carbohydrate phosphorylation	2	15	0.146153
GO	negative regulation of cytokine production involved in immune response	2	15	0.146153
GO	zinc ion transmembrane transport	2	15	0.146153
GO	regulation of spindle checkpoint	2	15	0.146153
GO	positive regulation of fatty acid oxidation	2	15	0.146153
GO	magnesium ion transport	2	15	0.146153
GO	Lys48-specific deubiquitinase activity	2	15	0.146153
GO	membrane lipid metabolic process	10	151	0.14828
GO	regulation of steroid biosynthetic process	5	62	0.149234
GO	integral component of mitochondrial membrane	5	62	0.149234
GO	iron-sulfur cluster binding	5	62	0.149234
GO	metal cluster binding	5	62	0.149234
GO	cation channel complex	9	133	0.150116
GO	anion binding	117	2357	0.150164
GO	purine ribonucleotide biosynthetic process	7	97	0.150758
GO	sarcolemma	7	97	0.150758
GO	cytoplasmic vesicle membrane	12	189	0.150963
GO	positive regulation of transport	44	827	0.151201
GO	sulfur compound binding	13	208	0.151254
GO	fear response	3	30	0.153155
GO	organic hydroxy compound transmembrane transporter activity	3	30	0.153155
GO	negative regulation of protein localization to nucleus	3	30	0.153155
GO	protein targeting to vacuole	3	30	0.153155
GO	stem cell development	3	30	0.153155
GO	reproductive behavior	3	30	0.153155
GO	regulation of voltage-gated calcium channel activity	3	30	0.153155
GO	positive regulation of mesenchymal cell proliferation	3	30	0.153155
GO	drug metabolic process	3	30	0.153155
GO	galactosyltransferase activity	3	30	0.153155
GO	alpha-amino acid biosynthetic process	4	46	0.154275
GO	late endosome membrane	4	46	0.154275
GO	primary active transmembrane transporter activity	4	46	0.154275
GO	anchored component of plasma membrane	4	46	0.154275
GO	sterol binding	4	46	0.154275
GO	cellular carbohydrate biosynthetic process	4	46	0.154275
GO	ion channel regulator activity	6	80	0.154588
GO	generation of precursor metabolites and energy	14	228	0.154693
GO	motile cilium	9	134	0.154917
GO	regulation of generation of precursor metabolites and energy	8	116	0.156312
GO	sodium ion transport	7	98	0.156464
GO	positive regulation of calcium ion transport	7	98	0.156464
GO	apoptotic mitochondrial changes	5	63	0.15648
GO	myelin sheath	11	172	0.158522
GO	cellular carbohydrate metabolic process	9	135	0.159792
GO	interspecies interaction between organisms	43	811	0.159885
GO	phosphatase activity	14	230	0.162094
[truncated: 5,234 more rows]

## Sheet: FFA83vsFF_Terms with Genes_up
Category	Term	Count in Selected Genes	Count in Total Population	P-value	Gene	Title	Symbol
GO	intrinsic component of membrane	245	3482	1.23764e-14	100038347	family with sequence similarity 174, member B	Fam174b
GO	intrinsic component of membrane	245	3482	1.23764e-14	100340	sphingomyelin phosphodiesterase, acid-like 3B	Smpdl3b
GO	intrinsic component of membrane	245	3482	1.23764e-14	100503386	trophoblast glycoprotein-like	Tpbgl
GO	intrinsic component of membrane	245	3482	1.23764e-14	102680	solute carrier family 6 (neurotransmitter transporter), member 20A	Slc6a20a
GO	intrinsic component of membrane	245	3482	1.23764e-14	105355	solute carrier family 17 (sodium phosphate), member 3	Slc17a3
GO	intrinsic component of membrane	245	3482	1.23764e-14	107375	solute carrier family 25, member 45	Slc25a45
GO	intrinsic component of membrane	245	3482	1.23764e-14	107448	unc-5 netrin receptor A	Unc5a
GO	intrinsic component of membrane	245	3482	1.23764e-14	107513	signal sequence receptor, alpha	Ssr1
GO	intrinsic component of membrane	245	3482	1.23764e-14	107585	deiodinase, iodothyronine type III	Dio3
GO	intrinsic component of membrane	245	3482	1.23764e-14	109254	androgen dependent TFPI regulating protein	Adtrp
GO	intrinsic component of membrane	245	3482	1.23764e-14	109700	integrin alpha 1	Itga1
GO	intrinsic component of membrane	245	3482	1.23764e-14	110172	solute carrier family 35, member B1	Slc35b1
GO	intrinsic component of membrane	245	3482	1.23764e-14	110880	sodium channel, voltage-gated, type IV, alpha	Scn4a
GO	intrinsic component of membrane	245	3482	1.23764e-14	114128	lysosomal-associated protein transmembrane 4B	Laptm4b
GO	intrinsic component of membrane	245	3482	1.23764e-14	11416	solute carrier family 33 (acetyl-CoA transporter), member 1	Slc33a1
GO	intrinsic component of membrane	245	3482	1.23764e-14	11419	acid-sensing (proton-gated) ion channel 1	Asic1
GO	intrinsic component of membrane	245	3482	1.23764e-14	11671	aldehyde dehydrogenase family 3, subfamily A2	Aldh3a2
GO	intrinsic component of membrane	245	3482	1.23764e-14	11827	aquaporin 2	Aqp2
GO	intrinsic component of membrane	245	3482	1.23764e-14	11830	aquaporin 5	Aqp5
GO	intrinsic component of membrane	245	3482	1.23764e-14	11833	aquaporin 8	Aqp8
GO	intrinsic component of membrane	245	3482	1.23764e-14	11979	ATPase, Cu++ transporting, beta polypeptide	Atp7b
GO	intrinsic component of membrane	245	3482	1.23764e-14	12068	Bet1 golgi vesicular membrane trafficking protein	Bet1
GO	intrinsic component of membrane	245	3482	1.23764e-14	12124	BCL2-interacting killer	Bik
GO	intrinsic component of membrane	245	3482	1.23764e-14	12182	bone marrow stromal cell antigen 1	Bst1
GO	intrinsic component of membrane	245	3482	1.23764e-14	12292	calcium channel, voltage-dependent, L type, alpha 1S subunit	Cacna1s
GO	intrinsic component of membrane	245	3482	1.23764e-14	12351	carbonic anhydrase 4	Car4
GO	intrinsic component of membrane	245	3482	1.23764e-14	12484	CD24a antigen	Cd24a
GO	intrinsic component of membrane	245	3482	1.23764e-14	12491	CD36 molecule	Cd36
GO	intrinsic component of membrane	245	3482	1.23764e-14	12492	scavenger receptor class B, member 2	Scarb2
GO	intrinsic component of membrane	245	3482	1.23764e-14	12496	ectonucleoside triphosphate diphosphohydrolase 2	Entpd2
GO	intrinsic component of membrane	245	3482	1.23764e-14	12514	CD68 antigen	Cd68
GO	intrinsic component of membrane	245	3482	1.23764e-14	12527	CD9 antigen	Cd9
GO	intrinsic component of membrane	245	3482	1.23764e-14	12556	cadherin 16	Cdh16
GO	intrinsic component of membrane	245	3482	1.23764e-14	12977	colony stimulating factor 1 (macrophage)	Csf1
GO	intrinsic component of membrane	245	3482	1.23764e-14	13052	coxsackie virus and adenovirus receptor	Cxadr
GO	intrinsic component of membrane	245	3482	1.23764e-14	13116	cytochrome P450, family 46, subfamily a, polypeptide 1	Cyp46a1
GO	intrinsic component of membrane	245	3482	1.23764e-14	13488	dopamine receptor D1	Drd1
GO	intrinsic component of membrane	245	3482	1.23764e-14	13723	embigin	Emb
GO	intrinsic component of membrane	245	3482	1.23764e-14	140494	ATPase, H+ transporting, lysosomal V0 subunit A4	Atp6v0a4
GO	intrinsic component of membrane	245	3482	1.23764e-14	14057	sideroflexin 1	Sfxn1
GO	intrinsic component of membrane	245	3482	1.23764e-14	14130	Fc receptor, IgG, low affinity IIb	Fcgr2b
GO	intrinsic component of membrane	245	3482	1.23764e-14	14183	fibroblast growth factor receptor 2	Fgfr2
GO	intrinsic component of membrane	245	3482	1.23764e-14	14256	FMS-like tyrosine kinase 3 ligand	Flt3l
GO	intrinsic component of membrane	245	3482	1.23764e-14	14539	opsin 1 (cone pigments), medium-wave-sensitive (color blindness, deutan)	Opn1mw
GO	intrinsic component of membrane	245	3482	1.23764e-14	14600	growth hormone receptor	Ghr
GO	intrinsic component of membrane	245	3482	1.23764e-14	14618	gap junction protein, beta 1	Gjb1
GO	intrinsic component of membrane	245	3482	1.23764e-14	14619	gap junction protein, beta 2	Gjb2
GO	intrinsic component of membrane	245	3482	1.23764e-14	15064	major histocompatibility complex, class I-related	Mr1
GO	intrinsic component of membrane	245	3482	1.23764e-14	15483	hydroxysteroid 11-beta dehydrogenase 1	Hsd11b1
GO	intrinsic component of membrane	245	3482	1.23764e-14	15898	intercellular adhesion molecule 5, telencephalin	Icam5
GO	intrinsic component of membrane	245	3482	1.23764e-14	15985	CD79B antigen	Cd79b
GO	intrinsic component of membrane	245	3482	1.23764e-14	16185	interleukin 2 receptor, beta chain	Il2rb
GO	intrinsic component of membrane	245	3482	1.23764e-14	16192	interleukin 5 receptor, alpha	Il5ra
GO	intrinsic component of membrane	245	3482	1.23764e-14	16399	integrin alpha 2b	Itga2b
GO	intrinsic component of membrane	245	3482	1.23764e-14	16432	integral membrane protein 2B	Itm2b
GO	intrinsic component of membrane	245	3482	1.23764e-14	16433	CUB and zona pellucida-like domains 1	Cuzd1
GO	intrinsic component of membrane	245	3482	1.23764e-14	16494	potassium voltage-gated channel, shaker-related, subfamily, member 6	Kcna6
GO	intrinsic component of membrane	245	3482	1.23764e-14	16517	potassium inwardly-rectifying channel, subfamily J, member 16	Kcnj16
GO	intrinsic component of membrane	245	3482	1.23764e-14	16528	potassium channel, subfamily K, member 4	Kcnk4
GO	intrinsic component of membrane	245	3482	1.23764e-14	16784	lysosomal-associated membrane protein 2	Lamp2
GO	intrinsic component of membrane	245	3482	1.23764e-14	16880	LIF receptor alpha	Lifr
GO	intrinsic component of membrane	245	3482	1.23764e-14	17068	lymphocyte antigen 6 complex, locus D	Ly6d
GO	intrinsic component of membrane	245	3482	1.23764e-14	171283	hepatitis A virus cellular receptor 1	Havcr1
GO	intrinsic component of membrane	245	3482	1.23764e-14	171284	T cell immunoglobulin and mucin domain containing 2	Timd2
GO	intrinsic component of membrane	245	3482	1.23764e-14	17155	mannosidase 1, alpha	Man1a
GO	intrinsic component of membrane	245	3482	1.23764e-14	17252	retinol dehydrogenase 11	Rdh11
GO	intrinsic component of membrane	245	3482	1.23764e-14	17388	matrix metallopeptidase 15	Mmp15
GO	intrinsic component of membrane	245	3482	1.23764e-14	18212	neurotrophic tyrosine kinase, receptor, type 2	Ntrk2
GO	intrinsic component of membrane	245	3482	1.23764e-14	18440	purinergic receptor P2X, ligand-gated ion channel, 6	P2rx6
GO	intrinsic component of membrane	245	3482	1.23764e-14	18618	phosphatidylethanolamine N-methyltransferase	Pemt
GO	intrinsic component of membrane	245	3482	1.23764e-14	18669	ATP-binding cassette, sub-family B (MDR/TAP), member 1B	Abcb1b
GO	intrinsic component of membrane	245	3482	1.23764e-14	18671	ATP-binding cassette, sub-family B (MDR/TAP), member 1A	Abcb1a
GO	intrinsic component of membrane	245	3482	1.23764e-14	18779	phospholipase A2 receptor 1	Pla2r1
GO	intrinsic component of membrane	245	3482	1.23764e-14	19027	synaptophysin-like protein	Sypl
GO	intrinsic component of membrane	245	3482	1.23764e-14	192193	ER degradation enhancer, mannosidase alpha-like 1	Edem1
GO	intrinsic component of membrane	245	3482	1.23764e-14	192212	prominin 2	Prom2
GO	intrinsic component of membrane	245	3482	1.23764e-14	19259	protein tyrosine phosphatase, non-receptor type 5	Ptpn5
GO	intrinsic component of membrane	245	3482	1.23764e-14	19264	protein tyrosine phosphatase, receptor type, C	Ptprc
GO	intrinsic component of membrane	245	3482	1.23764e-14	194597	transmembrane protease, serine 11a	Tmprss11a
GO	intrinsic component of membrane	245	3482	1.23764e-14	19886	Ros1 proto-oncogene	Ros1
GO	intrinsic component of membrane	245	3482	1.23764e-14	20014	ribophorin II	Rpn2
GO	intrinsic component of membrane	245	3482	1.23764e-14	20192	ryanodine receptor 3	Ryr3
GO	intrinsic component of membrane	245	3482	1.23764e-14	20351	sema domain, immunoglobulin domain (Ig), transmembrane domain (TM) and short cytoplasmic domain, (semaphorin) 4A	Sema4a
GO	intrinsic component of membrane	245	3482	1.23764e-14	20442	ST3 beta-galactoside alpha-2,3-sialyltransferase 1	St3gal1
GO	intrinsic component of membrane	245	3482	1.23764e-14	20500	solute carrier family 13 (sodium-dependent dicarboxylate transporter), member 2	Slc13a2
GO	intrinsic component of membrane	245	3482	1.23764e-14	20504	solute carrier family 17 (sodium phosphate), member 1	Slc17a1
GO	intrinsic component of membrane	245	3482	1.23764e-14	20524	solute carrier family 25 (mitochondrial carrier, peroxisomal membrane protein), member 17	Slc25a17
GO	intrinsic component of membrane	245	3482	1.23764e-14	207818	small cell adhesion glycoprotein	Smagp
GO	intrinsic component of membrane	245	3482	1.23764e-14	20832	signal sequence receptor, delta	Ssr4
GO	intrinsic component of membrane	245	3482	1.23764e-14	209588	secreted and transmembrane 1A	Sectm1a
GO	intrinsic component of membrane	245	3482	1.23764e-14	213068	transmembrane protein 71	Tmem71
GO	intrinsic component of membrane	245	3482	1.23764e-14	214523	transmembrane protease, serine 4	Tmprss4
GO	intrinsic component of membrane	245	3482	1.23764e-14	214531	transmembrane protease, serine 13	Tmprss13
GO	intrinsic component of membrane	245	3482	1.23764e-14	216225	solute carrier family 5 (iodide transporter), member 8	Slc5a8
GO	intrinsic component of membrane	245	3482	1.23764e-14	216350	tetraspanin 8	Tspan8
GO	intrinsic component of membrane	245	3482	1.23764e-14	217517	syntaxin binding protein 6 (amisyn)	Stxbp6
GO	intrinsic component of membrane	245	3482	1.23764e-14	217664	mannoside acetylglucosaminyltransferase 2	Mgat2
GO	intrinsic component of membrane	245	3482	1.23764e-14	21817	transglutaminase 2, C polypeptide	Tgm2
GO	intrinsic component of membrane	245	3482	1.23764e-14	21824	thrombomodulin	Thbd
GO	intrinsic component of membrane	245	3482	1.23764e-14	218476	glucosaminyl (N-acetyl) transferase 4, core 2 (beta-1,6-N-acetylglucosaminyltransferase)	Gcnt4
GO	intrinsic component of membrane	245	3482	1.23764e-14	21912	tetraspanin 7	Tspan7
GO	intrinsic component of membrane	245	3482	1.23764e-14	21936	tumor necrosis factor receptor superfamily, member 18	Tnfrsf18
GO	intrinsic component of membrane	245	3482	1.23764e-14	22095	thyroid stimulating hormone receptor	Tshr
GO	intrinsic component of membrane	245	3482	1.23764e-14	22238	UDP glucuronosyltransferase 2 family, polypeptide B5	Ugt2b5
GO	intrinsic component of membrane	245	3482	1.23764e-14	22296	vomeronasal 1 receptor 51	Vmn1r51
GO	intrinsic component of membrane	245	3482	1.23764e-14	22368	transient receptor potential cation channel, subfamily V, member 2	Trpv2
GO	intrinsic component of membrane	245	3482	1.23764e-14	22393	wolframin ER transmembrane glycoprotein	Wfs1
GO	intrinsic component of membrane	245	3482	1.23764e-14	224022	solute carrier family 7 (cationic amino acid transporter, y+ system), member 4	Slc7a4
GO	intrinsic component of membrane	245	3482	1.23764e-14	224132	solute carrier family 49 member 4	Slc49a4
GO	intrinsic component of membrane	245	3482	1.23764e-14	224454	zinc finger, DHHC domain containing 14	Zdhhc14
GO	intrinsic component of membrane	245	3482	1.23764e-14	22598	solute carrier family 6 (neurotransmitter transporter), member 18	Slc6a18
GO	intrinsic component of membrane	245	3482	1.23764e-14	226040	transmembrane protein 252	Tmem252
GO	intrinsic component of membrane	245	3482	1.23764e-14	22626	solute carrier family 23 (nucleobase transporters), member 3	Slc23a3
GO	intrinsic component of membrane	245	3482	1.23764e-14	226499	odr4 GPCR localization factor homolog	Odr4
GO	intrinsic component of membrane	245	3482	1.23764e-14	226777	RIKEN cDNA C130074G19 gene	C130074G19Rik
GO	intrinsic component of membrane	245	3482	1.23764e-14	226844	feline leukemia virus subgroup C cellular receptor 1	Flvcr1
GO	intrinsic component of membrane	245	3482	1.23764e-14	22785	solute carrier family 30 (zinc transporter), member 4	Slc30a4
GO	intrinsic component of membrane	245	3482	1.23764e-14	228859	fat storage-inducing transmembrane protein 2	Fitm2
GO	intrinsic component of membrane	245	3482	1.23764e-14	229722	endosome-lysosome associated apoptosis and autophagy regulator 1	Elapor1
GO	intrinsic component of membrane	245	3482	1.23764e-14	230678	transmembrane protein 125	Tmem125
GO	intrinsic component of membrane	245	3482	1.23764e-14	231602	purinergic receptor P2X, ligand-gated ion channel, 2	P2rx2
GO	intrinsic component of membrane	245	3482	1.23764e-14	232984	UDP-GlcNAc:betaGal beta-1,3-N-acetylglucosaminyltransferase 8	B3gnt8
GO	intrinsic component of membrane	245	3482	1.23764e-14	238257	transmembrane protein 30B	Tmem30b
GO	intrinsic component of membrane	245	3482	1.23764e-14	240638	solute carrier family 16 (monocarboxylic acid transporters), member 12	Slc16a12
GO	intrinsic component of membrane	245	3482	1.23764e-14	241452	dehydrogenase/reductase (SDR family) member 9	Dhrs9
GO	intrinsic component of membrane	245	3482	1.23764e-14	242126	solute carrier family 22 (organic anion/cation transporter), member 15	Slc22a15
GO	intrinsic component of membrane	245	3482	1.23764e-14	244886	transmembrane protein 266	Tmem266
GO	intrinsic component of membrane	245	3482	1.23764e-14	245386	transmembrane protein 255A	Tmem255a
GO	intrinsic component of membrane	245	3482	1.23764e-14	245527	ectodysplasin A2 receptor	Eda2r
GO	intrinsic component of membrane	245	3482	1.23764e-14	246133	potassium voltage-gated channel, Isk-related subfamily, gene 2	Kcne2
GO	intrinsic component of membrane	245	3482	1.23764e-14	246696	solute carrier family 25, member 28	Slc25a28
GO	intrinsic component of membrane	245	3482	1.23764e-14	26434	prion like protein doppel	Prnd
GO	intrinsic component of membrane	245	3482	1.23764e-14	269116	neurofascin	Nfasc
GO	intrinsic component of membrane	245	3482	1.23764e-14	269346	solute carrier family 28 (sodium-coupled nucleoside transporter), member 2	Slc28a2
GO	intrinsic component of membrane	245	3482	1.23764e-14	270066	solute carrier family 35, member E1	Slc35e1
GO	intrinsic component of membrane	245	3482	1.23764e-14	27411	solute carrier family 14 (urea transporter), member 2	Slc14a2
GO	intrinsic component of membrane	245	3482	1.23764e-14	27973	vitamin K epoxide reductase complex, subunit 1	Vkorc1
GO	intrinsic component of membrane	245	3482	1.23764e-14	28146	stress-associated endoplasmic reticulum protein 1	Serp1
GO	intrinsic component of membrane	245	3482	1.23764e-14	29820	tumor necrosis factor receptor superfamily, member 19	Tnfrsf19
GO	intrinsic component of membrane	245	3482	1.23764e-14	30936	solute carrier family 46, member 2	Slc46a2
GO	intrinsic component of membrane	245	3482	1.23764e-14	30960	vesicle-associated membrane protein, associated protein A	Vapa
GO	intrinsic component of membrane	245	3482	1.23764e-14	319446	dipeptidase 2	Dpep2
GO	intrinsic component of membrane	245	3482	1.23764e-14	319832	transmembrane protein 229A	Tmem229a
GO	intrinsic component of membrane	245	3482	1.23764e-14	319848	solute carrier family 17 (sodium phosphate), member 4	Slc17a4
GO	intrinsic component of membrane	245	3482	1.23764e-14	320541	solute carrier family 35, member E2	Slc35e2
GO	intrinsic component of membrane	245	3482	1.23764e-14	320782	transmembrane protein 154	Tmem154
GO	intrinsic component of membrane	245	3482	1.23764e-14	328035	fatty acid desaturase domain family, member 6	Fads6
GO	intrinsic component of membrane	245	3482	1.23764e-14	328779	heparan sulfate (glucosamine) 3-O-sulfotransferase 6	Hs3st6
GO	intrinsic component of membrane	245	3482	1.23764e-14	338320	MIA SH3 domain ER export factor 2	Mia2
GO	intrinsic component of membrane	245	3482	1.23764e-14	338365	solute carrier family 41, member 2	Slc41a2
GO	intrinsic component of membrane	245	3482	1.23764e-14	338369	transmembrane protein 220	Tmem220
GO	intrinsic component of membrane	245	3482	1.23764e-14	381310	mechanosensory transduction mediator	Stum
GO	intrinsic component of membrane	245	3482	1.23764e-14	381629	all-trans retinoic acid induced differentiation factor	Atraid
GO	intrinsic component of membrane	245	3482	1.23764e-14	396184	fibronectin leucine rich transmembrane protein 1	Flrt1
GO	intrinsic component of membrane	245	3482	1.23764e-14	407243	transmembrane protein 189	Tmem189
GO	intrinsic component of membrane	245	3482	1.23764e-14	433323	sphingosine-1-phosphate phosphatase 2	Sgpp2
GO	intrinsic component of membrane	245	3482	1.23764e-14	52637	CDGSH iron sulfur domain 1	Cisd1
GO	intrinsic component of membrane	245	3482	1.23764e-14	52837	thioredoxin-related transmembrane protein 4	Tmx4
GO	intrinsic component of membrane	245	3482	1.23764e-14	53625	UDP-GlcNAc:betaGal beta-1,3-N-acetylglucosaminyltransferase 2	B3gnt2
GO	intrinsic component of membrane	245	3482	1.23764e-14	53881	solute carrier family 5 (inositol transporters), member 3	Slc5a3
GO	intrinsic component of membrane	245	3482	1.23764e-14	54167	inducible T cell co-stimulator	Icos
GO	intrinsic component of membrane	245	3482	1.23764e-14	54326	elongation of very long chain fatty acids (FEN1/Elo2, SUR4/Elo3, yeast)-like 2	Elovl2
GO	intrinsic component of membrane	245	3482	1.23764e-14	54405	NADH:ubiquinone oxidoreductase subunit A1	Ndufa1
GO	intrinsic component of membrane	245	3482	1.23764e-14	54445	unc-93 homolog B1, TLR signaling regulator	Unc93b1
GO	intrinsic component of membrane	245	3482	1.23764e-14	54710	heparan sulfate (glucosamine) 3-O-sulfotransferase 3B1	Hs3st3b1
GO	intrinsic component of membrane	245	3482	1.23764e-14	56175	beta-site APP-cleaving enzyme 2	Bace2
GO	intrinsic component of membrane	245	3482	1.23764e-14	56298	atlastin GTPase 2	Atl2
GO	intrinsic component of membrane	245	3482	1.23764e-14	56529	SEC11 homolog A, signal peptidase complex subunit	Sec11a
GO	intrinsic component of membrane	245	3482	1.23764e-14	56786	TMEM9 domain family, member B	Tmem9b
GO	intrinsic component of membrane	245	3482	1.23764e-14	56807	secretory carrier membrane protein 5	Scamp5
GO	intrinsic component of membrane	245	3482	1.23764e-14	57377	mannosyl-oligosaccharide glucosidase	Mogs
GO	intrinsic component of membrane	245	3482	1.23764e-14	58210	secreted and transmembrane 1B	Sectm1b
GO	intrinsic component of membrane	245	3482	1.23764e-14	59045	START domain containing 3	Stard3
GO	intrinsic component of membrane	245	3482	1.23764e-14	59048	C1GALT1-specific chaperone 1	C1galt1c1
GO	intrinsic component of membrane	245	3482	1.23764e-14	64051	synaptic vesicle glycoprotein 2 a	Sv2a
GO	intrinsic component of membrane	245	3482	1.23764e-14	64176	synaptic vesicle glycoprotein 2 b	Sv2b
GO	intrinsic component of membrane	245	3482	1.23764e-14	64540	tetraspanin 4	Tspan4
GO	intrinsic component of membrane	245	3482	1.23764e-14	66046	NADH:ubiquinone oxidoreductase subunit B5	Ndufb5
GO	intrinsic component of membrane	245	3482	1.23764e-14	66059	keratinocyte associated protein 2	Krtcap2
GO	intrinsic component of membrane	245	3482	1.23764e-14	66109	tetraspanin 13	Tspan13
GO	intrinsic component of membrane	245	3482	1.23764e-14	66111	transmembrane p24 trafficking protein 3	Tmed3
GO	intrinsic component of membrane	245	3482	1.23764e-14	66120	FK506 binding protein 11	Fkbp11
GO	intrinsic component of membrane	245	3482	1.23764e-14	66179	2-oxoglutarate and iron-dependent oxygenase domain containing 3	Ogfod3
GO	intrinsic component of membrane	245	3482	1.23764e-14	66191	immediate early response 3 interacting protein 1	Ier3ip1
GO	intrinsic component of membrane	245	3482	1.23764e-14	66269	transmembrane p24 trafficking protein 6	Tmed6
GO	intrinsic component of membrane	245	3482	1.23764e-14	66286	SEC11 homolog C, signal peptidase complex subunit	Sec11c
GO	intrinsic component of membrane	245	3482	1.23764e-14	66340	presenilin enhancer gamma secretase subunit	Psenen
GO	intrinsic component of membrane	245	3482	1.23764e-14	66357	oligosaccharyltransferase complex subunit (non-catalytic)	Ostc
GO	intrinsic component of membrane	245	3482	1.23764e-14	66451	RIKEN cDNA 2610528J11 gene	2610528J11Rik
GO	intrinsic component of membrane	245	3482	1.23764e-14	66694	ubiquinol-cytochrome c reductase, Rieske iron-sulfur polypeptide 1	Uqcrfs1
GO	intrinsic component of membrane	245	3482	1.23764e-14	667742	piezo-type mechanosensitive ion channel component 2	Piezo2
GO	intrinsic component of membrane	245	3482	1.23764e-14	66815	mitochondrial calcium uniporter dominant negative beta subunit	Mcub
GO	intrinsic component of membrane	245	3482	1.23764e-14	66910	transmembrane protein 107	Tmem107
GO	intrinsic component of membrane	245	3482	1.23764e-14	66925	succinate dehydrogenase complex, subunit D, integral membrane protein	Sdhd
GO	intrinsic component of membrane	245	3482	1.23764e-14	67075	magnesium transporter 1	Magt1
GO	intrinsic component of membrane	245	3482	1.23764e-14	67216	membrane bound O-acyltransferase domain containing 2	Mboat2
GO	intrinsic component of membrane	245	3482	1.23764e-14	67456	ERGIC and golgi 2	Ergic2
GO	intrinsic component of membrane	245	3482	1.23764e-14	67473	solute carrier family 47, member 1	Slc47a1
GO	intrinsic component of membrane	245	3482	1.23764e-14	67630	sterile alpha motif domain containing 8	Samd8
GO	intrinsic component of membrane	245	3482	1.23764e-14	67713	DnaJ heat shock protein family (Hsp40) member C19	Dnajc19
GO	intrinsic component of membrane	245	3482	1.23764e-14	67887	store-operated calcium entry-associated regulatory factor	Saraf
GO	intrinsic component of membrane	245	3482	1.23764e-14	67893	transmembrane protein 86A	Tmem86a
GO	intrinsic component of membrane	245	3482	1.23764e-14	68212	transmembrane BAX inhibitor motif containing 4	Tmbim4
GO	intrinsic component of membrane	245	3482	1.23764e-14	68262	1-acylglycerol-3-phosphate O-acyltransferase 4 (lysophosphatidic acid acyltransferase, delta)	Agpat4
GO	intrinsic component of membrane	245	3482	1.23764e-14	68316	apolipoprotein O	Apoo
GO	intrinsic component of membrane	245	3482	1.23764e-14	68552	small integral membrane protein 14	Smim14
GO	intrinsic component of membrane	245	3482	1.23764e-14	68581	transmembrane p24 trafficking protein 10	Tmed10
GO	intrinsic component of membrane	245	3482	1.23764e-14	68616	glycerophosphodiester phosphodiesterase domain containing 3	Gdpd3
GO	intrinsic component of membrane	245	3482	1.23764e-14	68936	small integral membrane protein 11	Smim11
GO	intrinsic component of membrane	245	3482	1.23764e-14	68947	carbohydrate sulfotransferase 8	Chst8
GO	intrinsic component of membrane	245	3482	1.23764e-14	69038	transmembrane protein 258	Tmem258
GO	intrinsic component of membrane	245	3482	1.23764e-14	69047	ATPase, Ca++ transporting, type 2C, member 2	Atp2c2
GO	intrinsic component of membrane	245	3482	1.23764e-14	69137	V-set and transmembrane domain containing 5	Vstm5
GO	intrinsic component of membrane	245	3482	1.23764e-14	69568	vitamin K epoxide reductase complex, subunit 1-like 1	Vkorc1l1
GO	intrinsic component of membrane	245	3482	1.23764e-14	69806	solute carrier family 39 (metal ion transporter), member 11	Slc39a11
GO	intrinsic component of membrane	245	3482	1.23764e-14	70059	delta(4)-desaturase, sphingolipid 2	Degs2
GO	intrinsic component of membrane	245	3482	1.23764e-14	70361	lectin, mannose-binding, 1	Lman1
GO	intrinsic component of membrane	245	3482	1.23764e-14	70456	mitochondrial pyruvate carrier 2	Mpc2
GO	intrinsic component of membrane	245	3482	1.23764e-14	70556	solute carrier family 25, member 33	Slc25a33
GO	intrinsic component of membrane	245	3482	1.23764e-14	71764	C2 calcium-dependent domain containing 2-like	C2cd2l
GO	intrinsic component of membrane	245	3482	1.23764e-14	71816	ring finger protein 180	Rnf180
GO	intrinsic component of membrane	245	3482	1.23764e-14	71881	adipocyte plasma membrane associated protein	Apmap
GO	intrinsic component of membrane	245	3482	1.23764e-14	71897	LY6/PLAUR domain containing 6B	Lypd6b
GO	intrinsic component of membrane	245	3482	1.23764e-14	71927	integrin alpha FG-GAP repeat containing 1	Itfg1
GO	intrinsic component of membrane	245	3482	1.23764e-14	71998	solute carrier family 25, member 35	Slc25a35
GO	intrinsic component of membrane	245	3482	1.23764e-14	72022	solute carrier family 35, member F2	Slc35f2
GO	intrinsic component of membrane	245	3482	1.23764e-14	72278	cell cycle progression 1	Ccpg1
GO	intrinsic component of membrane	245	3482	1.23764e-14	72393	Fas apoptotic inhibitory molecule 2	Faim2
GO	intrinsic component of membrane	245	3482	1.23764e-14	73024	ER membrane protein complex subunit 7	Emc7
GO	intrinsic component of membrane	245	3482	1.23764e-14	74032	short chain dehydrogenase/reductase family 42E, member 1	Sdr42e1
GO	intrinsic component of membrane	245	3482	1.23764e-14	74043	peroxisomal biogenesis factor 26	Pex26
GO	intrinsic component of membrane	245	3482	1.23764e-14	74104	ATP-binding cassette, sub-family B (MDR/TAP), member 6	Abcb6
GO	intrinsic component of membrane	245	3482	1.23764e-14	74253	killer cell lectin-like receptor subfamily G, member 2	Klrg2
GO	intrinsic component of membrane	245	3482	1.23764e-14	76192	abhydrolase domain containing 12	Abhd12
GO	intrinsic component of membrane	245	3482	1.23764e-14	76408	ATP-binding cassette, sub-family C (CFTR/MRP), member 3	Abcc3
GO	intrinsic component of membrane	245	3482	1.23764e-14	76560	protease, serine 8 (prostasin)	Prss8
GO	intrinsic component of membrane	245	3482	1.23764e-14	76942	Ly6/Plaur domain containing 5	Lypd5
GO	intrinsic component of membrane	245	3482	1.23764e-14	77596	adhesion G protein-coupled receptor F1	Adgrf1
GO	intrinsic component of membrane	245	3482	1.23764e-14	77975	transmembrane protein 50B	Tmem50b
GO	intrinsic component of membrane	245	3482	1.23764e-14	78308	G protein-coupled receptor 108	Gpr108
GO	intrinsic component of membrane	245	3482	1.23764e-14	78830	solute carrier family 25 (mitochondrial carrier, Aralar), member 12	Slc25a12
GO	intrinsic component of membrane	245	3482	1.23764e-14	78885	coronin 7	Coro7
GO	intrinsic component of membrane	245	3482	1.23764e-14	79235	lecithin-retinol acyltransferase (phosphatidylcholine-retinol-O-acyltransferase)	Lrat
GO	intrinsic component of membrane	245	3482	1.23764e-14	94219	cyclin M2	Cnnm2
GO	intrinsic component of membrane	245	3482	1.23764e-14	96957	transmembrane protein 62	Tmem62
GO	small molecule metabolic process	114	1228	7.0276e-14	100198	hexose-6-phosphate dehydrogenase (glucose 1-dehydrogenase)	H6pd
GO	small molecule metabolic process	114	1228	7.0276e-14	104776	aldehyde dehydrogenase family 6, subfamily A1	Aldh6a1
GO	small molecule metabolic process	114	1228	7.0276e-14	104923	acireductone dioxygenase 1	Adi1
GO	small molecule metabolic process	114	1228	7.0276e-14	105349	aldo-keto reductase family 1, member C18	Akr1c18
GO	small molecule metabolic process	114	1228	7.0276e-14	105355	solute carrier family 17 (sodium phosphate), member 3	Slc17a3
GO	small molecule metabolic process	114	1228	7.0276e-14	105387	aldo-keto reductase family 1, member C14	Akr1c14
GO	small molecule metabolic process	114	1228	7.0276e-14	107569	5'-nucleotidase, cytosolic III	Nt5c3
GO	small molecule metabolic process	114	1228	7.0276e-14	108156	methylenetetrahydrofolate dehydrogenase (NADP+ dependent), methenyltetrahydrofolate cyclohydrolase, formyltetrahydrofolate synthase	Mthfd1
GO	small molecule metabolic process	114	1228	7.0276e-14	109254	androgen dependent TFPI regulating protein	Adtrp
GO	small molecule metabolic process	114	1228	7.0276e-14	110446	acetyl-Coenzyme A acetyltransferase 1	Acat1
GO	small molecule metabolic process	114	1228	7.0276e-14	110842	electron transferring flavoprotein, alpha polypeptide	Etfa
GO	small molecule metabolic process	114	1228	7.0276e-14	11430	acyl-Coenzyme A oxidase 1, palmitoyl	Acox1
GO	small molecule metabolic process	114	1228	7.0276e-14	11522	alcohol dehydrogenase 1 (class I)	Adh1
GO	small molecule metabolic process	114	1228	7.0276e-14	11671	aldehyde dehydrogenase family 3, subfamily A2	Aldh3a2
GO	small molecule metabolic process	114	1228	7.0276e-14	11676	aldolase C, fructose-bisphosphate	Aldoc
GO	small molecule metabolic process	114	1228	7.0276e-14	11770	fatty acid binding protein 4, adipocyte	Fabp4
GO	small molecule metabolic process	114	1228	7.0276e-14	11847	arginase type II	Arg2
GO	small molecule metabolic process	114	1228	7.0276e-14	11910	activating transcription factor 3	Atf3
GO	small molecule metabolic process	114	1228	7.0276e-14	11949	ATP synthase, H+ transporting, mitochondrial F1 complex, gamma polypeptide 1	Atp5c1
GO	small molecule metabolic process	114	1228	7.0276e-14	11992	AU RNA binding protein/enoyl-coenzyme A hydratase	Auh
GO	small molecule metabolic process	114	1228	7.0276e-14	12041	branched chain ketoacid dehydrogenase kinase	Bckdk
GO	small molecule metabolic process	114	1228	7.0276e-14	12491	CD36 molecule	Cd36
GO	small molecule metabolic process	114	1228	7.0276e-14	12496	ectonucleoside triphosphate diphosphohydrolase 2	Entpd2
GO	small molecule metabolic process	114	1228	7.0276e-14	13074	cytochrome P450, family 17, subfamily a, polypeptide 1	Cyp17a1
GO	small molecule metabolic process	114	1228	7.0276e-14	13082	cytochrome P450, family 26, subfamily a, polypeptide 1	Cyp26a1
GO	small molecule metabolic process	114	1228	7.0276e-14	13116	cytochrome P450, family 46, subfamily a, polypeptide 1	Cyp46a1
GO	small molecule metabolic process	114	1228	7.0276e-14	13480	dolichol-phosphate (beta-D) mannosyltransferase 1	Dpm1
GO	small molecule metabolic process	114	1228	7.0276e-14	14057	sideroflexin 1	Sfxn1
GO	small molecule metabolic process	114	1228	7.0276e-14	14148	ferredoxin 1	Fdx1
GO	small molecule metabolic process	114	1228	7.0276e-14	14187	aldo-keto reductase family 1, member B8	Akr1b8
GO	small molecule metabolic process	114	1228	7.0276e-14	14600	growth hormone receptor	Ghr
GO	small molecule metabolic process	114	1228	7.0276e-14	14651	hydroxyacyl glutathione hydrolase	Hagh
GO	small molecule metabolic process	114	1228	7.0276e-14	14661	glutamate dehydrogenase 1	Glud1
GO	small molecule metabolic process	114	1228	7.0276e-14	14718	glutamic-oxaloacetic transaminase 1, soluble	Got1
GO	small molecule metabolic process	114	1228	7.0276e-14	15356	3-hydroxy-3-methylglutaryl-Coenzyme A lyase	Hmgcl
GO	small molecule metabolic process	114	1228	7.0276e-14	15452	hypoxanthine guanine phosphoribosyl transferase	Hprt
GO	small molecule metabolic process	114	1228	7.0276e-14	16329	inositol polyphosphate-1-phosphatase	Inpp1
GO	small molecule metabolic process	114	1228	7.0276e-14	16592	fatty acid binding protein 5, epidermal	Fabp5
GO	small molecule metabolic process	114	1228	7.0276e-14	16922	phytanoyl-CoA hydroxylase	Phyh
GO	small molecule metabolic process	114	1228	7.0276e-14	17252	retinol dehydrogenase 11	Rdh11
GO	small molecule metabolic process	114	1228	7.0276e-14	17436	malic enzyme 1, NADP(+)-dependent, cytosolic	Me1
GO	small molecule metabolic process	114	1228	7.0276e-14	17449	malate dehydrogenase 1, NAD (soluble)	Mdh1
GO	small molecule metabolic process	114	1228	7.0276e-14	18618	phosphatidylethanolamine N-methyltransferase	Pemt
GO	small molecule metabolic process	114	1228	7.0276e-14	18950	purine-nucleoside phosphorylase	Pnp
GO	small molecule metabolic process	114	1228	7.0276e-14	19125	proline dehydrogenase	Prodh
GO	small molecule metabolic process	114	1228	7.0276e-14	19378	aldehyde dehydrogenase family 1, subfamily A2	Aldh1a2
GO	small molecule metabolic process	114	1228	7.0276e-14	19662	retinol binding protein 4, plasma	Rbp4
GO	small molecule metabolic process	114	1228	7.0276e-14	19703	renin binding protein	Renbp
GO	small molecule metabolic process	114	1228	7.0276e-14	20135	ribonucleotide reductase M2	Rrm2
GO	small molecule metabolic process	114	1228	7.0276e-14	20322	sorbitol dehydrogenase	Sord
GO	small molecule metabolic process	114	1228	7.0276e-14	20504	solute carrier family 17 (sodium phosphate), member 1	Slc17a1
GO	small molecule metabolic process	114	1228	7.0276e-14	20524	solute carrier family 25 (mitochondrial carrier, peroxisomal membrane protein), member 17	Slc25a17
GO	small molecule metabolic process	114	1228	7.0276e-14	20750	secreted phosphoprotein 1	Spp1
GO	small molecule metabolic process	114	1228	7.0276e-14	20917	succinate-Coenzyme A ligase, GDP-forming, beta subunit	Suclg2
GO	small molecule metabolic process	114	1228	7.0276e-14	209378	inter-alpha (globulin) inhibitor H5	Itih5
GO	small molecule metabolic process	114	1228	7.0276e-14	215446	ectonucleoside triphosphate diphosphohydrolase 3	Entpd3
GO	small molecule metabolic process	114	1228	7.0276e-14	216134	pyridoxal (pyridoxine, vitamin B6) kinase	Pdxk
GO	small molecule metabolic process	114	1228	7.0276e-14	217837	inositol 1,3,4-triphosphate 5/6 kinase	Itpk1
GO	small molecule metabolic process	114	1228	7.0276e-14	218138	GDP-mannose 4, 6-dehydratase	Gmds
GO	small molecule metabolic process	114	1228	7.0276e-14	22235	UDP-glucose dehydrogenase	Ugdh
GO	small molecule metabolic process	114	1228	7.0276e-14	225579	solute carrier family 27 (fatty acid transporter), member 6	Slc27a6
GO	small molecule metabolic process	114	1228	7.0276e-14	226143	cytochrome P450, family 2, subfamily c, polypeptide 23	Cyp2c23
GO	small molecule metabolic process	114	1228	7.0276e-14	227095	3-hydroxyisobutyryl-Coenzyme A hydrolase	Hibch
GO	small molecule metabolic process	114	1228	7.0276e-14	229905	kynurenine aminotransferase 3	Kyat3
GO	small molecule metabolic process	114	1228	7.0276e-14	229949	adenylate kinase 5	Ak5
GO	small molecule metabolic process	114	1228	7.0276e-14	231327	phosphoribosyl pyrophosphate amidotransferase	Ppat
GO	small molecule metabolic process	114	1228	7.0276e-14	234199	fibrinogen-like protein 1	Fgl1
GO	small molecule metabolic process	114	1228	7.0276e-14	235674	acetyl-Coenzyme A acyltransferase 1B	Acaa1b
GO	small molecule metabolic process	114	1228	7.0276e-14	23945	monoglyceride lipase	Mgll
GO	small molecule metabolic process	114	1228	7.0276e-14	23972	3'-phosphoadenosine 5'-phosphosulfate synthase 2	Papss2
GO	small molecule metabolic process	114	1228	7.0276e-14	241452	dehydrogenase/reductase (SDR family) member 9	Dhrs9
GO	small molecule metabolic process	114	1228	7.0276e-14	243537	urocanase domain containing 1	Uroc1
GO	small molecule metabolic process	114	1228	7.0276e-14	26363	biotinidase	Btd
GO	small molecule metabolic process	114	1228	7.0276e-14	264895	acyl-CoA synthetase family member 2	Acsf2
GO	small molecule metabolic process	114	1228	7.0276e-14	27973	vitamin K epoxide reductase complex, subunit 1	Vkorc1
GO	small molecule metabolic process	114	1228	7.0276e-14	28146	stress-associated endoplasmic reticulum protein 1	Serp1
GO	small molecule metabolic process	114	1228	7.0276e-14	319446	dipeptidase 2	Dpep2
GO	small molecule metabolic process	114	1228	7.0276e-14	319625	galactose mutarotase	Galm
GO	small molecule metabolic process	114	1228	7.0276e-14	328035	fatty acid desaturase domain family, member 6	Fads6
GO	small molecule metabolic process	114	1228	7.0276e-14	407243	transmembrane protein 189	Tmem189
GO	small molecule metabolic process	114	1228	7.0276e-14	433323	sphingosine-1-phosphate phosphatase 2	Sgpp2
GO	small molecule metabolic process	114	1228	7.0276e-14	52064	coenzyme Q5 methyltransferase	Coq5
GO	small molecule metabolic process	114	1228	7.0276e-14	53881	solute carrier family 5 (inositol transporters), member 3	Slc5a3
GO	small molecule metabolic process	114	1228	7.0276e-14	54326	elongation of very long chain fatty acids (FEN1/Elo2, SUR4/Elo3, yeast)-like 2	Elovl2
GO	small molecule metabolic process	114	1228	7.0276e-14	56045	SAM domain and HD domain, 1	Samhd1
GO	small molecule metabolic process	114	1228	7.0276e-14	56357	isovaleryl coenzyme A dehydrogenase	Ivd
GO	small molecule metabolic process	114	1228	7.0276e-14	56794	2-hydroxyacyl-CoA lyase 1	Hacl1
GO	small molecule metabolic process	114	1228	7.0276e-14	58875	3-hydroxyisobutyrate dehydrogenase	Hibadh
GO	small molecule metabolic process	114	1228	7.0276e-14	59045	START domain containing 3	Stard3
GO	small molecule metabolic process	114	1228	7.0276e-14	65254	dihydropyrimidinase-like 5	Dpysl5
GO	small molecule metabolic process	114	1228	7.0276e-14	66128	mitochondrial ribosomal protein S36	Mrps36
GO	small molecule metabolic process	114	1228	7.0276e-14	66514	asparaginase like 1	Asrgl1
GO	small molecule metabolic process	114	1228	7.0276e-14	66588	cytidine monophosphate (UMP-CMP) kinase 1	Cmpk1
GO	small molecule metabolic process	114	1228	7.0276e-14	66885	acyl-Coenzyme A dehydrogenase, short/branched chain	Acadsb
GO	small molecule metabolic process	114	1228	7.0276e-14	67054	phosphoribosylaminoimidazole carboxylase, phosphoribosylaminoribosylaminoimidazole, succinocarboxamide synthetase	Paics
GO	small molecule metabolic process	114	1228	7.0276e-14	67092	glycine amidinotransferase (L-arginine:glycine amidinotransferase)	Gatm
GO	small molecule metabolic process	114	1228	7.0276e-14	67111	N-acylethanolamine acid amidase	Naaa
GO	small molecule metabolic process	114	1228	7.0276e-14	67528	nudix (nucleoside diphosphate linked moiety X)-type motif 7	Nudt7
GO	small molecule metabolic process	114	1228	7.0276e-14	68738	acyl-CoA synthetase short-chain family member 1	Acss1
GO	small molecule metabolic process	114	1228	7.0276e-14	69568	vitamin K epoxide reductase complex, subunit 1-like 1	Vkorc1l1
GO	small molecule metabolic process	114	1228	7.0276e-14	69718	inositol polyphosphate multikinase	Ipmk
GO	small molecule metabolic process	114	1228	7.0276e-14	70059	delta(4)-desaturase, sphingolipid 2	Degs2
GO	small molecule metabolic process	114	1228	7.0276e-14	70266	kynurenine aminotransferase 1	Kyat1
GO	small molecule metabolic process	114	1228	7.0276e-14	70456	mitochondrial pyruvate carrier 2	Mpc2
GO	small molecule metabolic process	114	1228	7.0276e-14	71780	myo-inositol 1-phosphate synthase A1	Isyna1
GO	small molecule metabolic process	114	1228	7.0276e-14	71797	carbohydrate sulfotransferase 13	Chst13
GO	small molecule metabolic process	114	1228	7.0276e-14	74114	carnitine O-octanoyltransferase	Crot
GO	small molecule metabolic process	114	1228	7.0276e-14	74134	cytochrome P450, family 2, subfamily s, polypeptide 1	Cyp2s1
GO	small molecule metabolic process	114	1228	7.0276e-14	74156	acyl-CoA thioesterase 12	Acot12
GO	small molecule metabolic process	114	1228	7.0276e-14	76563	glutaminyl-tRNA synthase (glutamine-hydrolyzing)-like 1	Qrsl1
GO	small molecule metabolic process	114	1228	7.0276e-14	76974	urate (5-hydroxyiso-) hydrolase	Urah
GO	small molecule metabolic process	114	1228	7.0276e-14	77974	retinol dehydrogenase 12	Rdh12
GO	small molecule metabolic process	114	1228	7.0276e-14	79235	lecithin-retinol acyltransferase (phosphatidylcholine-retinol-O-acyltransferase)	Lrat
GO	small molecule metabolic process	114	1228	7.0276e-14	94284	UDP glucuronosyltransferase 1 family, polypeptide A6A	Ugt1a6a
GO	integral component of membrane	235	3351	9.1049e-14	100038347	family with sequence similarity 174, member B	Fam174b
GO	integral component of membrane	235	3351	9.1049e-14	100503386	trophoblast glycoprotein-like	Tpbgl
GO	integral component of membrane	235	3351	9.1049e-14	102680	solute carrier family 6 (neurotransmitter transporter), member 20A	Slc6a20a
GO	integral component of membrane	235	3351	9.1049e-14	105355	solute carrier family 17 (sodium phosphate), member 3	Slc17a3
GO	integral component of membrane	235	3351	9.1049e-14	107375	solute carrier family 25, member 45	Slc25a45
GO	integral component of membrane	235	3351	9.1049e-14	107448	unc-5 netrin receptor A	Unc5a
GO	integral component of membrane	235	3351	9.1049e-14	107513	signal sequence receptor, alpha	Ssr1
GO	integral component of membrane	235	3351	9.1049e-14	107585	deiodinase, iodothyronine type III	Dio3
GO	integral component of membrane	235	3351	9.1049e-14	109254	androgen dependent TFPI regulating protein	Adtrp
GO	integral component of membrane	235	3351	9.1049e-14	109700	integrin alpha 1	Itga1
GO	integral component of membrane	235	3351	9.1049e-14	110172	solute carrier family 35, member B1	Slc35b1
GO	integral component of membrane	235	3351	9.1049e-14	110880	sodium channel, voltage-gated, type IV, alpha	Scn4a
GO	integral component of membrane	235	3351	9.1049e-14	114128	lysosomal-associated protein transmembrane 4B	Laptm4b
GO	integral component of membrane	235	3351	9.1049e-14	11416	solute carrier family 33 (acetyl-CoA transporter), member 1	Slc33a1
GO	integral component of membrane	235	3351	9.1049e-14	11419	acid-sensing (proton-gated) ion channel 1	Asic1
GO	integral component of membrane	235	3351	9.1049e-14	11671	aldehyde dehydrogenase family 3, subfamily A2	Aldh3a2
GO	integral component of membrane	235	3351	9.1049e-14	11827	aquaporin 2	Aqp2
GO	integral component of membrane	235	3351	9.1049e-14	11830	aquaporin 5	Aqp5
GO	integral component of membrane	235	3351	9.1049e-14	11833	aquaporin 8	Aqp8
GO	integral component of membrane	235	3351	9.1049e-14	11979	ATPase, Cu++ transporting, beta polypeptide	Atp7b
GO	integral component of membrane	235	3351	9.1049e-14	12068	Bet1 golgi vesicular membrane trafficking protein	Bet1
GO	integral component of membrane	235	3351	9.1049e-14	12124	BCL2-interacting killer	Bik
GO	integral component of membrane	235	3351	9.1049e-14	12292	calcium channel, voltage-dependent, L type, alpha 1S subunit	Cacna1s
GO	integral component of membrane	235	3351	9.1049e-14	12491	CD36 molecule	Cd36
GO	integral component of membrane	235	3351	9.1049e-14	12492	scavenger receptor class B, member 2	Scarb2
GO	integral component of membrane	235	3351	9.1049e-14	12496	ectonucleoside triphosphate diphosphohydrolase 2	Entpd2
GO	integral component of membrane	235	3351	9.1049e-14	12514	CD68 antigen	Cd68
GO	integral component of membrane	235	3351	9.1049e-14	12527	CD9 antigen	Cd9
GO	integral component of membrane	235	3351	9.1049e-14	12556	cadherin 16	Cdh16
GO	integral component of membrane	235	3351	9.1049e-14	12977	colony stimulating factor 1 (macrophage)	Csf1
GO	integral component of membrane	235	3351	9.1049e-14	13052	coxsackie virus and adenovirus receptor	Cxadr
GO	integral component of membrane	235	3351	9.1049e-14	13116	cytochrome P450, family 46, subfamily a, polypeptide 1	Cyp46a1
GO	integral component of membrane	235	3351	9.1049e-14	13488	dopamine receptor D1	Drd1
GO	integral component of membrane	235	3351	9.1049e-14	13723	embigin	Emb
GO	integral component of membrane	235	3351	9.1049e-14	140494	ATPase, H+ transporting, lysosomal V0 subunit A4	Atp6v0a4
GO	integral component of membrane	235	3351	9.1049e-14	14057	sideroflexin 1	Sfxn1
GO	integral component of membrane	235	3351	9.1049e-14	14130	Fc receptor, IgG, low affinity IIb	Fcgr2b
GO	integral component of membrane	235	3351	9.1049e-14	14183	fibroblast growth factor receptor 2	Fgfr2
GO	integral component of membrane	235	3351	9.1049e-14	14256	FMS-like tyrosine kinase 3 ligand	Flt3l
GO	integral component of membrane	235	3351	9.1049e-14	14539	opsin 1 (cone pigments), medium-wave-sensitive (color blindness, deutan)	Opn1mw
GO	integral component of membrane	235	3351	9.1049e-14	14600	growth hormone receptor	Ghr
GO	integral component of membrane	235	3351	9.1049e-14	14618	gap junction protein, beta 1	Gjb1
GO	integral component of membrane	235	3351	9.1049e-14	14619	gap junction protein, beta 2	Gjb2
GO	integral component of membrane	235	3351	9.1049e-14	15064	major histocompatibility complex, class I-related	Mr1
GO	integral component of membrane	235	3351	9.1049e-14	15483	hydroxysteroid 11-beta dehydrogenase 1	Hsd11b1
GO	integral component of membrane	235	3351	9.1049e-14	15898	intercellular adhesion molecule 5, telencephalin	Icam5
GO	integral component of membrane	235	3351	9.1049e-14	15985	CD79B antigen	Cd79b
GO	integral component of membrane	235	3351	9.1049e-14	16185	interleukin 2 receptor, beta chain	Il2rb
GO	integral component of membrane	235	3351	9.1049e-14	16192	interleukin 5 receptor, alpha	Il5ra
GO	integral component of membrane	235	3351	9.1049e-14	16399	integrin alpha 2b	Itga2b
GO	integral component of membrane	235	3351	9.1049e-14	16432	integral membrane protein 2B	Itm2b
GO	integral component of membrane	235	3351	9.1049e-14	16433	CUB and zona pellucida-like domains 1	Cuzd1
GO	integral component of membrane	235	3351	9.1049e-14	16494	potassium voltage-gated channel, shaker-related, subfamily, member 6	Kcna6
GO	integral component of membrane	235	3351	9.1049e-14	16517	potassium inwardly-rectifying channel, subfamily J, member 16	Kcnj16
GO	integral component of membrane	235	3351	9.1049e-14	16528	potassium channel, subfamily K, member 4	Kcnk4
GO	integral component of membrane	235	3351	9.1049e-14	16784	lysosomal-associated membrane protein 2	Lamp2
GO	integral component of membrane	235	3351	9.1049e-14	16880	LIF receptor alpha	Lifr
GO	integral component of membrane	235	3351	9.1049e-14	171283	hepatitis A virus cellular receptor 1	Havcr1
GO	integral component of membrane	235	3351	9.1049e-14	171284	T cell immunoglobulin and mucin domain containing 2	Timd2
GO	integral component of membrane	235	3351	9.1049e-14	17155	mannosidase 1, alpha	Man1a
GO	integral component of membrane	235	3351	9.1049e-14	17252	retinol dehydrogenase 11	Rdh11
GO	integral component of membrane	235	3351	9.1049e-14	17388	matrix metallopeptidase 15	Mmp15
GO	integral component of membrane	235	3351	9.1049e-14	18212	neurotrophic tyrosine kinase, receptor, type 2	Ntrk2
GO	integral component of membrane	235	3351	9.1049e-14	18440	purinergic receptor P2X, ligand-gated ion channel, 6	P2rx6
GO	integral component of membrane	235	3351	9.1049e-14	18618	phosphatidylethanolamine N-methyltransferase	Pemt
GO	integral component of membrane	235	3351	9.1049e-14	18669	ATP-binding cassette, sub-family B (MDR/TAP), member 1B	Abcb1b
GO	integral component of membrane	235	3351	9.1049e-14	18671	ATP-binding cassette, sub-family B (MDR/TAP), member 1A	Abcb1a
GO	integral component of membrane	235	3351	9.1049e-14	18779	phospholipase A2 receptor 1	Pla2r1
GO	integral component of membrane	235	3351	9.1049e-14	19027	synaptophysin-like protein	Sypl
GO	integral component of membrane	235	3351	9.1049e-14	192193	ER degradation enhancer, mannosidase alpha-like 1	Edem1
GO	integral component of membrane	235	3351	9.1049e-14	192212	prominin 2	Prom2
GO	integral component of membrane	235	3351	9.1049e-14	19259	protein tyrosine phosphatase, non-receptor type 5	Ptpn5
GO	integral component of membrane	235	3351	9.1049e-14	19264	protein tyrosine phosphatase, receptor type, C	Ptprc
GO	integral component of membrane	235	3351	9.1049e-14	194597	transmembrane protease, serine 11a	Tmprss11a
GO	integral component of membrane	235	3351	9.1049e-14	19886	Ros1 proto-oncogene	Ros1
GO	integral component of membrane	235	3351	9.1049e-14	20014	ribophorin II	Rpn2
GO	integral component of membrane	235	3351	9.1049e-14	20192	ryanodine receptor 3	Ryr3
GO	integral component of membrane	235	3351	9.1049e-14	20351	sema domain, immunoglobulin domain (Ig), transmembrane domain (TM) and short cytoplasmic domain, (semaphorin) 4A	Sema4a
GO	integral component of membrane	235	3351	9.1049e-14	20442	ST3 beta-galactoside alpha-2,3-sialyltransferase 1	St3gal1
GO	integral component of membrane	235	3351	9.1049e-14	20500	solute carrier family 13 (sodium-dependent dicarboxylate transporter), member 2	Slc13a2
GO	integral component of membrane	235	3351	9.1049e-14	20504	solute carrier family 17 (sodium phosphate), member 1	Slc17a1
GO	integral component of membrane	235	3351	9.1049e-14	20524	solute carrier family 25 (mitochondrial carrier, peroxisomal membrane protein), member 17	Slc25a17
GO	integral component of membrane	235	3351	9.1049e-14	207818	small cell adhesion glycoprotein	Smagp
GO	integral component of membrane	235	3351	9.1049e-14	20832	signal sequence receptor, delta	Ssr4
GO	integral component of membrane	235	3351	9.1049e-14	209588	secreted and transmembrane 1A	Sectm1a
GO	integral component of membrane	235	3351	9.1049e-14	213068	transmembrane protein 71	Tmem71
GO	integral component of membrane	235	3351	9.1049e-14	214523	transmembrane protease, serine 4	Tmprss4
GO	integral component of membrane	235	3351	9.1049e-14	214531	transmembrane protease, serine 13	Tmprss13
GO	integral component of membrane	235	3351	9.1049e-14	216225	solute carrier family 5 (iodide transporter), member 8	Slc5a8
GO	integral component of membrane	235	3351	9.1049e-14	216350	tetraspanin 8	Tspan8
GO	integral component of membrane	235	3351	9.1049e-14	217517	syntaxin binding protein 6 (amisyn)	Stxbp6
GO	integral component of membrane	235	3351	9.1049e-14	217664	mannoside acetylglucosaminyltransferase 2	Mgat2
GO	integral component of membrane	235	3351	9.1049e-14	21824	thrombomodulin	Thbd
GO	integral component of membrane	235	3351	9.1049e-14	218476	glucosaminyl (N-acetyl) transferase 4, core 2 (beta-1,6-N-acetylglucosaminyltransferase)	Gcnt4
GO	integral component of membrane	235	3351	9.1049e-14	21912	tetraspanin 7	Tspan7
GO	integral component of membrane	235	3351	9.1049e-14	21936	tumor necrosis factor receptor superfamily, member 18	Tnfrsf18
GO	integral component of membrane	235	3351	9.1049e-14	22095	thyroid stimulating hormone receptor	Tshr
GO	integral component of membrane	235	3351	9.1049e-14	22238	UDP glucuronosyltransferase 2 family, polypeptide B5	Ugt2b5
GO	integral component of membrane	235	3351	9.1049e-14	22296	vomeronasal 1 receptor 51	Vmn1r51
GO	integral component of membrane	235	3351	9.1049e-14	22368	transient receptor potential cation channel, subfamily V, member 2	Trpv2
GO	integral component of membrane	235	3351	9.1049e-14	22393	wolframin ER transmembrane glycoprotein	Wfs1
GO	integral component of membrane	235	3351	9.1049e-14	224022	solute carrier family 7 (cationic amino acid transporter, y+ system), member 4	Slc7a4
GO	integral component of membrane	235	3351	9.1049e-14	224132	solute carrier family 49 member 4	Slc49a4
GO	integral component of membrane	235	3351	9.1049e-14	224454	zinc finger, DHHC domain containing 14	Zdhhc14
GO	integral component of membrane	235	3351	9.1049e-14	22598	solute carrier family 6 (neurotransmitter transporter), member 18	Slc6a18
GO	integral component of membrane	235	3351	9.1049e-14	226040	transmembrane protein 252	Tmem252
GO	integral component of membrane	235	3351	9.1049e-14	22626	solute carrier family 23 (nucleobase transporters), member 3	Slc23a3
GO	integral component of membrane	235	3351	9.1049e-14	226499	odr4 GPCR localization factor homolog	Odr4
GO	integral component of membrane	235	3351	9.1049e-14	226777	RIKEN cDNA C130074G19 gene	C130074G19Rik
GO	integral component of membrane	235	3351	9.1049e-14	226844	feline leukemia virus subgroup C cellular receptor 1	Flvcr1
GO	integral component of membrane	235	3351	9.1049e-14	22785	solute carrier family 30 (zinc transporter), member 4	Slc30a4
GO	integral component of membrane	235	3351	9.1049e-14	228859	fat storage-inducing transmembrane protein 2	Fitm2
GO	integral component of membrane	235	3351	9.1049e-14	229722	endosome-lysosome associated apoptosis and autophagy regulator 1	Elapor1
GO	integral component of membrane	235	3351	9.1049e-14	230678	transmembrane protein 125	Tmem125
GO	integral component of membrane	235	3351	9.1049e-14	231602	purinergic receptor P2X, ligand-gated ion channel, 2	P2rx2
GO	integral component of membrane	235	3351	9.1049e-14	232984	UDP-GlcNAc:betaGal beta-1,3-N-acetylglucosaminyltransferase 8	B3gnt8
GO	integral component of membrane	235	3351	9.1049e-14	238257	transmembrane protein 30B	Tmem30b
GO	integral component of membrane	235	3351	9.1049e-14	240638	solute carrier family 16 (monocarboxylic acid transporters), member 12	Slc16a12
GO	integral component of membrane	235	3351	9.1049e-14	241452	dehydrogenase/reductase (SDR family) member 9	Dhrs9
GO	integral component of membrane	235	3351	9.1049e-14	242126	solute carrier family 22 (organic anion/cation transporter), member 15	Slc22a15
GO	integral component of membrane	235	3351	9.1049e-14	244886	transmembrane protein 266	Tmem266
GO	integral component of membrane	235	3351	9.1049e-14	245386	transmembrane protein 255A	Tmem255a
GO	integral component of membrane	235	3351	9.1049e-14	245527	ectodysplasin A2 receptor	Eda2r
GO	integral component of membrane	235	3351	9.1049e-14	246133	potassium voltage-gated channel, Isk-related subfamily, gene 2	Kcne2
GO	integral component of membrane	235	3351	9.1049e-14	246696	solute carrier family 25, member 28	Slc25a28
GO	integral component of membrane	235	3351	9.1049e-14	269116	neurofascin	Nfasc
GO	integral component of membrane	235	3351	9.1049e-14	269346	solute carrier family 28 (sodium-coupled nucleoside transporter), member 2	Slc28a2
GO	integral component of membrane	235	3351	9.1049e-14	270066	solute carrier family 35, member E1	Slc35e1
GO	integral component of membrane	235	3351	9.1049e-14	27411	solute carrier family 14 (urea transporter), member 2	Slc14a2
GO	integral component of membrane	235	3351	9.1049e-14	27973	vitamin K epoxide reductase complex, subunit 1	Vkorc1
GO	integral component of membrane	235	3351	9.1049e-14	28146	stress-associated endoplasmic reticulum protein 1	Serp1
GO	integral component of membrane	235	3351	9.1049e-14	29820	tumor necrosis factor receptor superfamily, member 19	Tnfrsf19
GO	integral component of membrane	235	3351	9.1049e-14	30936	solute carrier family 46, member 2	Slc46a2
GO	integral component of membrane	235	3351	9.1049e-14	30960	vesicle-associated membrane protein, associated protein A	Vapa
GO	integral component of membrane	235	3351	9.1049e-14	319832	transmembrane protein 229A	Tmem229a
GO	integral component of membrane	235	3351	9.1049e-14	319848	solute carrier family 17 (sodium phosphate), member 4	Slc17a4
GO	integral component of membrane	235	3351	9.1049e-14	320541	solute carrier family 35, member E2	Slc35e2
GO	integral component of membrane	235	3351	9.1049e-14	320782	transmembrane protein 154	Tmem154
GO	integral component of membrane	235	3351	9.1049e-14	328035	fatty acid desaturase domain family, member 6	Fads6
GO	integral component of membrane	235	3351	9.1049e-14	328779	heparan sulfate (glucosamine) 3-O-sulfotransferase 6	Hs3st6
GO	integral component of membrane	235	3351	9.1049e-14	338320	MIA SH3 domain ER export factor 2	Mia2
GO	integral component of membrane	235	3351	9.1049e-14	338365	solute carrier family 41, member 2	Slc41a2
GO	integral component of membrane	235	3351	9.1049e-14	338369	transmembrane protein 220	Tmem220
GO	integral component of membrane	235	3351	9.1049e-14	381310	mechanosensory transduction mediator	Stum
GO	integral component of membrane	235	3351	9.1049e-14	381629	all-trans retinoic acid induced differentiation factor	Atraid
GO	integral component of membrane	235	3351	9.1049e-14	396184	fibronectin leucine rich transmembrane protein 1	Flrt1
GO	integral component of membrane	235	3351	9.1049e-14	407243	transmembrane protein 189	Tmem189
GO	integral component of membrane	235	3351	9.1049e-14	433323	sphingosine-1-phosphate phosphatase 2	Sgpp2
GO	integral component of membrane	235	3351	9.1049e-14	52637	CDGSH iron sulfur domain 1	Cisd1
GO	integral component of membrane	235	3351	9.1049e-14	52837	thioredoxin-related transmembrane protein 4	Tmx4
GO	integral component of membrane	235	3351	9.1049e-14	53625	UDP-GlcNAc:betaGal beta-1,3-N-acetylglucosaminyltransferase 2	B3gnt2
GO	integral component of membrane	235	3351	9.1049e-14	53881	solute carrier family 5 (inositol transporters), member 3	Slc5a3
GO	integral component of membrane	235	3351	9.1049e-14	54167	inducible T cell co-stimulator	Icos
GO	integral component of membrane	235	3351	9.1049e-14	54326	elongation of very long chain fatty acids (FEN1/Elo2, SUR4/Elo3, yeast)-like 2	Elovl2
GO	integral component of membrane	235	3351	9.1049e-14	54405	NADH:ubiquinone oxidoreductase subunit A1	Ndufa1
GO	integral component of membrane	235	3351	9.1049e-14	54445	unc-93 homolog B1, TLR signaling regulator	Unc93b1
GO	integral component of membrane	235	3351	9.1049e-14	54710	heparan sulfate (glucosamine) 3-O-sulfotransferase 3B1	Hs3st3b1
GO	integral component of membrane	235	3351	9.1049e-14	56175	beta-site APP-cleaving enzyme 2	Bace2
GO	integral component of membrane	235	3351	9.1049e-14	56298	atlastin GTPase 2	Atl2
GO	integral component of membrane	235	3351	9.1049e-14	56529	SEC11 homolog A, signal peptidase complex subunit	Sec11a
GO	integral component of membrane	235	3351	9.1049e-14	56786	TMEM9 domain family, member B	Tmem9b
GO	integral component of membrane	235	3351	9.1049e-14	56807	secretory carrier membrane protein 5	Scamp5
GO	integral component of membrane	235	3351	9.1049e-14	57377	mannosyl-oligosaccharide glucosidase	Mogs
GO	integral component of membrane	235	3351	9.1049e-14	58210	secreted and transmembrane 1B	Sectm1b
GO	integral component of membrane	235	3351	9.1049e-14	59045	START domain containing 3	Stard3
GO	integral component of membrane	235	3351	9.1049e-14	59048	C1GALT1-specific chaperone 1	C1galt1c1
GO	integral component of membrane	235	3351	9.1049e-14	64051	synaptic vesicle glycoprotein 2 a	Sv2a
GO	integral component of membrane	235	3351	9.1049e-14	64176	synaptic vesicle glycoprotein 2 b	Sv2b
GO	integral component of membrane	235	3351	9.1049e-14	64540	tetraspanin 4	Tspan4
GO	integral component of membrane	235	3351	9.1049e-14	66046	NADH:ubiquinone oxidoreductase subunit B5	Ndufb5
GO	integral component of membrane	235	3351	9.1049e-14	66059	keratinocyte associated protein 2	Krtcap2
GO	integral component of membrane	235	3351	9.1049e-14	66109	tetraspanin 13	Tspan13
GO	integral component of membrane	235	3351	9.1049e-14	66111	transmembrane p24 trafficking protein 3	Tmed3
GO	integral component of membrane	235	3351	9.1049e-14	66120	FK506 binding protein 11	Fkbp11
GO	integral component of membrane	235	3351	9.1049e-14	66179	2-oxoglutarate and iron-dependent oxygenase domain containing 3	Ogfod3
GO	integral component of membrane	235	3351	9.1049e-14	66191	immediate early response 3 interacting protein 1	Ier3ip1
GO	integral component of membrane	235	3351	9.1049e-14	66269	transmembrane p24 trafficking protein 6	Tmed6
GO	integral component of membrane	235	3351	9.1049e-14	66286	SEC11 homolog C, signal peptidase complex subunit	Sec11c
GO	integral component of membrane	235	3351	9.1049e-14	66340	presenilin enhancer gamma secretase subunit	Psenen
GO	integral component of membrane	235	3351	9.1049e-14	66357	oligosaccharyltransferase complex subunit (non-catalytic)	Ostc
GO	integral component of membrane	235	3351	9.1049e-14	66451	RIKEN cDNA 2610528J11 gene	2610528J11Rik
GO	integral component of membrane	235	3351	9.1049e-14	66694	ubiquinol-cytochrome c reductase, Rieske iron-sulfur polypeptide 1	Uqcrfs1
GO	integral component of membrane	235	3351	9.1049e-14	667742	piezo-type mechanosensitive ion channel component 2	Piezo2
GO	integral component of membrane	235	3351	9.1049e-14	66815	mitochondrial calcium uniporter dominant negative beta subunit	Mcub
GO	integral component of membrane	235	3351	9.1049e-14	66910	transmembrane protein 107	Tmem107
GO	integral component of membrane	235	3351	9.1049e-14	66925	succinate dehydrogenase complex, subunit D, integral membrane protein	Sdhd
GO	integral component of membrane	235	3351	9.1049e-14	67075	magnesium transporter 1	Magt1
GO	integral component of membrane	235	3351	9.1049e-14	67216	membrane bound O-acyltransferase domain containing 2	Mboat2
GO	integral component of membrane	235	3351	9.1049e-14	67456	ERGIC and golgi 2	Ergic2
GO	integral component of membrane	235	3351	9.1049e-14	67473	solute carrier family 47, member 1	Slc47a1
GO	integral component of membrane	235	3351	9.1049e-14	67630	sterile alpha motif domain containing 8	Samd8
GO	integral component of membrane	235	3351	9.1049e-14	67713	DnaJ heat shock protein family (Hsp40) member C19	Dnajc19
GO	integral component of membrane	235	3351	9.1049e-14	67887	store-operated calcium entry-associated regulatory factor	Saraf
GO	integral component of membrane	235	3351	9.1049e-14	67893	transmembrane protein 86A	Tmem86a
GO	integral component of membrane	235	3351	9.1049e-14	68212	transmembrane BAX inhibitor motif containing 4	Tmbim4
GO	integral component of membrane	235	3351	9.1049e-14	68262	1-acylglycerol-3-phosphate O-acyltransferase 4 (lysophosphatidic acid acyltransferase, delta)	Agpat4
GO	integral component of membrane	235	3351	9.1049e-14	68316	apolipoprotein O	Apoo
GO	integral component of membrane	235	3351	9.1049e-14	68552	small integral membrane protein 14	Smim14
GO	integral component of membrane	235	3351	9.1049e-14	68581	transmembrane p24 trafficking protein 10	Tmed10
GO	integral component of membrane	235	3351	9.1049e-14	68616	glycerophosphodiester phosphodiesterase domain containing 3	Gdpd3
GO	integral component of membrane	235	3351	9.1049e-14	68936	small integral membrane protein 11	Smim11
GO	integral component of membrane	235	3351	9.1049e-14	68947	carbohydrate sulfotransferase 8	Chst8
GO	integral component of membrane	235	3351	9.1049e-14	69038	transmembrane protein 258	Tmem258
GO	integral component of membrane	235	3351	9.1049e-14	69047	ATPase, Ca++ transporting, type 2C, member 2	Atp2c2
GO	integral component of membrane	235	3351	9.1049e-14	69137	V-set and transmembrane domain containing 5	Vstm5
GO	integral component of membrane	235	3351	9.1049e-14	69568	vitamin K epoxide reductase complex, subunit 1-like 1	Vkorc1l1
GO	integral component of membrane	235	3351	9.1049e-14	69806	solute carrier family 39 (metal ion transporter), member 11	Slc39a11
GO	integral component of membrane	235	3351	9.1049e-14	70059	delta(4)-desaturase, sphingolipid 2	Degs2
GO	integral component of membrane	235	3351	9.1049e-14	70361	lectin, mannose-binding, 1	Lman1
GO	integral component of membrane	235	3351	9.1049e-14	70456	mitochondrial pyruvate carrier 2	Mpc2
GO	integral component of membrane	235	3351	9.1049e-14	70556	solute carrier family 25, member 33	Slc25a33
GO	integral component of membrane	235	3351	9.1049e-14	71764	C2 calcium-dependent domain containing 2-like	C2cd2l
GO	integral component of membrane	235	3351	9.1049e-14	71816	ring finger protein 180	Rnf180
GO	integral component of membrane	235	3351	9.1049e-14	71881	adipocyte plasma membrane associated protein	Apmap
GO	integral component of membrane	235	3351	9.1049e-14	71927	integrin alpha FG-GAP repeat containing 1	Itfg1
GO	integral component of membrane	235	3351	9.1049e-14	71998	solute carrier family 25, member 35	Slc25a35
GO	integral component of membrane	235	3351	9.1049e-14	72022	solute carrier family 35, member F2	Slc35f2
GO	integral component of membrane	235	3351	9.1049e-14	72278	cell cycle progression 1	Ccpg1
GO	integral component of membrane	235	3351	9.1049e-14	72393	Fas apoptotic inhibitory molecule 2	Faim2
GO	integral component of membrane	235	3351	9.1049e-14	73024	ER membrane protein complex subunit 7	Emc7
GO	integral component of membrane	235	3351	9.1049e-14	74032	short chain dehydrogenase/reductase family 42E, member 1	Sdr42e1
GO	integral component of membrane	235	3351	9.1049e-14	74043	peroxisomal biogenesis factor 26	Pex26
GO	integral component of membrane	235	3351	9.1049e-14	74104	ATP-binding cassette, sub-family B (MDR/TAP), member 6	Abcb6
GO	integral component of membrane	235	3351	9.1049e-14	74253	killer cell lectin-like receptor subfamily G, member 2	Klrg2
GO	integral component of membrane	235	3351	9.1049e-14	76192	abhydrolase domain containing 12	Abhd12
GO	integral component of membrane	235	3351	9.1049e-14	76408	ATP-binding cassette, sub-family C (CFTR/MRP), member 3	Abcc3
GO	integral component of membrane	235	3351	9.1049e-14	76560	protease, serine 8 (prostasin)	Prss8
GO	integral component of membrane	235	3351	9.1049e-14	77596	adhesion G protein-coupled receptor F1	Adgrf1
GO	integral component of membrane	235	3351	9.1049e-14	77975	transmembrane protein 50B	Tmem50b
GO	integral component of membrane	235	3351	9.1049e-14	78308	G protein-coupled receptor 108	Gpr108
GO	integral component of membrane	235	3351	9.1049e-14	78830	solute carrier family 25 (mitochondrial carrier, Aralar), member 12	Slc25a12
GO	integral component of membrane	235	3351	9.1049e-14	78885	coronin 7	Coro7
GO	integral component of membrane	235	3351	9.1049e-14	79235	lecithin-retinol acyltransferase (phosphatidylcholine-retinol-O-acyltransferase)	Lrat
GO	integral component of membrane	235	3351	9.1049e-14	94219	cyclin M2	Cnnm2
GO	integral component of membrane	235	3351	9.1049e-14	96957	transmembrane protein 62	Tmem62
GO	membrane	368	6095	6.299e-13	100038347	family with sequence similarity 174, member B	Fam174b
GO	membrane	368	6095	6.299e-13	100340	sphingomyelin phosphodiesterase, acid-like 3B	Smpdl3b
GO	membrane	368	6095	6.299e-13	100503386	trophoblast glycoprotein-like	Tpbgl
GO	membrane	368	6095	6.299e-13	102680	solute carrier family 6 (neurotransmitter transporter), member 20A	Slc6a20a
GO	membrane	368	6095	6.299e-13	104923	acireductone dioxygenase 1	Adi1
GO	membrane	368	6095	6.299e-13	105352	dual specificity phosphatase 22	Dusp22
GO	membrane	368	6095	6.299e-13	105355	solute carrier family 17 (sodium phosphate), member 3	Slc17a3
GO	membrane	368	6095	6.299e-13	107375	solute carrier family 25, member 45	Slc25a45
GO	membrane	368	6095	6.299e-13	107448	unc-5 netrin receptor A	Unc5a
GO	membrane	368	6095	6.299e-13	107513	signal sequence receptor, alpha	Ssr1
GO	membrane	368	6095	6.299e-13	107585	deiodinase, iodothyronine type III	Dio3
GO	membrane	368	6095	6.299e-13	108687	ER degradation enhancer, mannosidase alpha-like 2	Edem2
GO	membrane	368	6095	6.299e-13	109254	androgen dependent TFPI regulating protein	Adtrp
GO	membrane	368	6095	6.299e-13	109700	integrin alpha 1	Itga1
GO	membrane	368	6095	6.299e-13	110172	solute carrier family 35, member B1	Slc35b1
GO	membrane	368	6095	6.299e-13	110265	methionine sulfoxide reductase A	Msra
GO	membrane	368	6095	6.299e-13	110446	acetyl-Coenzyme A acetyltransferase 1	Acat1
GO	membrane	368	6095	6.299e-13	110880	sodium channel, voltage-gated, type IV, alpha	Scn4a
GO	membrane	368	6095	6.299e-13	114128	lysosomal-associated protein transmembrane 4B	Laptm4b
GO	membrane	368	6095	6.299e-13	11416	solute carrier family 33 (acetyl-CoA transporter), member 1	Slc33a1
GO	membrane	368	6095	6.299e-13	11419	acid-sensing (proton-gated) ion channel 1	Asic1
GO	membrane	368	6095	6.299e-13	11430	acyl-Coenzyme A oxidase 1, palmitoyl	Acox1
GO	membrane	368	6095	6.299e-13	11522	alcohol dehydrogenase 1 (class I)	Adh1
GO	membrane	368	6095	6.299e-13	11671	aldehyde dehydrogenase family 3, subfamily A2	Aldh3a2
GO	membrane	368	6095	6.299e-13	11827	aquaporin 2	Aqp2
GO	membrane	368	6095	6.299e-13	11830	aquaporin 5	Aqp5
GO	membrane	368	6095	6.299e-13	11833	aquaporin 8	Aqp8
GO	membrane	368	6095	6.299e-13	11949	ATP synthase, H+ transporting, mitochondrial F1 complex, gamma polypeptide 1	Atp5c1
GO	membrane	368	6095	6.299e-13	11964	ATPase, H+ transporting, lysosomal V1 subunit A	Atp6v1a
GO	membrane	368	6095	6.299e-13	11979	ATPase, Cu++ transporting, beta polypeptide	Atp7b
GO	membrane	368	6095	6.299e-13	12068	Bet1 golgi vesicular membrane trafficking protein	Bet1
GO	membrane	368	6095	6.299e-13	12124	BCL2-interacting killer	Bik
GO	membrane	368	6095	6.299e-13	12182	bone marrow stromal cell antigen 1	Bst1
GO	membrane	368	6095	6.299e-13	12292	calcium channel, voltage-dependent, L type, alpha 1S subunit	Cacna1s
GO	membrane	368	6095	6.299e-13	12351	carbonic anhydrase 4	Car4
GO	membrane	368	6095	6.299e-13	12484	CD24a antigen	Cd24a
GO	membrane	368	6095	6.299e-13	12491	CD36 molecule	Cd36
GO	membrane	368	6095	6.299e-13	12492	scavenger receptor class B, member 2	Scarb2
GO	membrane	368	6095	6.299e-13	12496	ectonucleoside triphosphate diphosphohydrolase 2	Entpd2
GO	membrane	368	6095	6.299e-13	12514	CD68 antigen	Cd68
GO	membrane	368	6095	6.299e-13	12527	CD9 antigen	Cd9
GO	membrane	368	6095	6.299e-13	12556	cadherin 16	Cdh16
GO	membrane	368	6095	6.299e-13	12716	creatine kinase, mitochondrial 1, ubiquitous	Ckmt1
GO	membrane	368	6095	6.299e-13	12858	cytochrome c oxidase subunit 5A	Cox5a
GO	membrane	368	6095	6.299e-13	12879	cystin 1	Cys1
GO	membrane	368	6095	6.299e-13	12977	colony stimulating factor 1 (macrophage)	Csf1
GO	membrane	368	6095	6.299e-13	13030	cathepsin B	Ctsb
GO	membrane	368	6095	6.299e-13	13052	coxsackie virus and adenovirus receptor	Cxadr
GO	membrane	368	6095	6.299e-13	13074	cytochrome P450, family 17, subfamily a, polypeptide 1	Cyp17a1
GO	membrane	368	6095	6.299e-13	13082	cytochrome P450, family 26, subfamily a, polypeptide 1	Cyp26a1
GO	membrane	368	6095	6.299e-13	13116	cytochrome P450, family 46, subfamily a, polypeptide 1	Cyp46a1
GO	membrane	368	6095	6.299e-13	13214	defensin beta 1	Defb1
GO	membrane	368	6095	6.299e-13	13480	dolichol-phosphate (beta-D) mannosyltransferase 1	Dpm1
GO	membrane	368	6095	6.299e-13	13488	dopamine receptor D1	Drd1
GO	membrane	368	6095	6.299e-13	13723	embigin	Emb
GO	membrane	368	6095	6.299e-13	13804	endonuclease G	Endog
GO	membrane	368	6095	6.299e-13	140494	ATPase, H+ transporting, lysosomal V0 subunit A4	Atp6v0a4
GO	membrane	368	6095	6.299e-13	14057	sideroflexin 1	Sfxn1
GO	membrane	368	6095	6.299e-13	140743	rad and gem related GTP binding protein 2	Rem2
GO	membrane	368	6095	6.299e-13	14130	Fc receptor, IgG, low affinity IIb	Fcgr2b
GO	membrane	368	6095	6.299e-13	14133	ficolin A	Fcna
GO	membrane	368	6095	6.299e-13	14183	fibroblast growth factor receptor 2	Fgfr2
GO	membrane	368	6095	6.299e-13	14227	FK506 binding protein 2	Fkbp2
GO	membrane	368	6095	6.299e-13	14251	flotillin 1	Flot1
GO	membrane	368	6095	6.299e-13	14256	FMS-like tyrosine kinase 3 ligand	Flt3l
GO	membrane	368	6095	6.299e-13	14468	guanylate binding protein 2b	Gbp2b
GO	membrane	368	6095	6.299e-13	14539	opsin 1 (cone pigments), medium-wave-sensitive (color blindness, deutan)	Opn1mw
GO	membrane	368	6095	6.299e-13	14600	growth hormone receptor	Ghr
GO	membrane	368	6095	6.299e-13	14618	gap junction protein, beta 1	Gjb1
GO	membrane	368	6095	6.299e-13	14619	gap junction protein, beta 2	Gjb2
GO	membrane	368	6095	6.299e-13	14661	glutamate dehydrogenase 1	Glud1
GO	membrane	368	6095	6.299e-13	14701	guanine nucleotide binding protein (G protein), gamma 12	Gng12
GO	membrane	368	6095	6.299e-13	14869	glutathione S-transferase, pi 2	Gstp2
GO	membrane	368	6095	6.299e-13	14870	glutathione S-transferase, pi 1	Gstp1
GO	membrane	368	6095	6.299e-13	15064	major histocompatibility complex, class I-related	Mr1
GO	membrane	368	6095	6.299e-13	15212	hexosaminidase B	Hexb
GO	membrane	368	6095	6.299e-13	15356	3-hydroxy-3-methylglutaryl-Coenzyme A lyase	Hmgcl
GO	membrane	368	6095	6.299e-13	15483	hydroxysteroid 11-beta dehydrogenase 1	Hsd11b1
GO	membrane	368	6095	6.299e-13	15507	heat shock protein 1	Hspb1
GO	membrane	368	6095	6.299e-13	15893	islet cell autoantigen 1	Ica1
GO	membrane	368	6095	6.299e-13	15898	intercellular adhesion molecule 5, telencephalin	Icam5
GO	membrane	368	6095	6.299e-13	15925	insulin degrading enzyme	Ide
GO	membrane	368	6095	6.299e-13	15985	CD79B antigen	Cd79b
GO	membrane	368	6095	6.299e-13	16185	interleukin 2 receptor, beta chain	Il2rb
GO	membrane	368	6095	6.299e-13	16192	interleukin 5 receptor, alpha	Il5ra
GO	membrane	368	6095	6.299e-13	16399	integrin alpha 2b	Itga2b
GO	membrane	368	6095	6.299e-13	16432	integral membrane protein 2B	Itm2b
GO	membrane	368	6095	6.299e-13	16433	CUB and zona pellucida-like domains 1	Cuzd1
GO	membrane	368	6095	6.299e-13	16494	potassium voltage-gated channel, shaker-related, subfamily, member 6	Kcna6
GO	membrane	368	6095	6.299e-13	16517	potassium inwardly-rectifying channel, subfamily J, member 16	Kcnj16
GO	membrane	368	6095	6.299e-13	16528	potassium channel, subfamily K, member 4	Kcnk4
GO	membrane	368	6095	6.299e-13	16558	kinesin family member 16B	Kif16b
GO	membrane	368	6095	6.299e-13	16601	Kruppel-like factor 9	Klf9
GO	membrane	368	6095	6.299e-13	16784	lysosomal-associated membrane protein 2	Lamp2
GO	membrane	368	6095	6.299e-13	16880	LIF receptor alpha	Lifr
GO	membrane	368	6095	6.299e-13	17060	B cell linker	Blnk
GO	membrane	368	6095	6.299e-13	17068	lymphocyte antigen 6 complex, locus D	Ly6d
GO	membrane	368	6095	6.299e-13	170728	reticulon 4 interacting protein 1	Rtn4ip1
GO	membrane	368	6095	6.299e-13	171283	hepatitis A virus cellular receptor 1	Havcr1
GO	membrane	368	6095	6.299e-13	171284	T cell immunoglobulin and mucin domain containing 2	Timd2
GO	membrane	368	6095	6.299e-13	17155	mannosidase 1, alpha	Man1a
GO	membrane	368	6095	6.299e-13	17252	retinol dehydrogenase 11	Rdh11
GO	membrane	368	6095	6.299e-13	17388	matrix metallopeptidase 15	Mmp15
GO	membrane	368	6095	6.299e-13	18164	neuronal pentraxin 1	Nptx1
GO	membrane	368	6095	6.299e-13	18212	neurotrophic tyrosine kinase, receptor, type 2	Ntrk2
GO	membrane	368	6095	6.299e-13	18220	nucleobindin 1	Nucb1
GO	membrane	368	6095	6.299e-13	18440	purinergic receptor P2X, ligand-gated ion channel, 6	P2rx6
GO	membrane	368	6095	6.299e-13	18453	prolyl 4-hydroxylase, beta polypeptide	P4hb
GO	membrane	368	6095	6.299e-13	18483	paralemmin	Palm
GO	membrane	368	6095	6.299e-13	18607	3-phosphoinositide dependent protein kinase 1	Pdpk1
GO	membrane	368	6095	6.299e-13	18618	phosphatidylethanolamine N-methyltransferase	Pemt
GO	membrane	368	6095	6.299e-13	18669	ATP-binding cassette, sub-family B (MDR/TAP), member 1B	Abcb1b
GO	membrane	368	6095	6.299e-13	18671	ATP-binding cassette, sub-family B (MDR/TAP), member 1A	Abcb1a
GO	membrane	368	6095	6.299e-13	18779	phospholipase A2 receptor 1	Pla2r1
GO	membrane	368	6095	6.299e-13	18973	polymerase (DNA directed), epsilon	Pole
GO	membrane	368	6095	6.299e-13	19027	synaptophysin-like protein	Sypl
GO	membrane	368	6095	6.299e-13	19073	serglycin	Srgn
GO	membrane	368	6095	6.299e-13	19125	proline dehydrogenase	Prodh
GO	membrane	368	6095	6.299e-13	19142	protease, serine 12 neurotrypsin (motopsin)	Prss12
GO	membrane	368	6095	6.299e-13	19152	proteinase 3	Prtn3
GO	membrane	368	6095	6.299e-13	192193	ER degradation enhancer, mannosidase alpha-like 1	Edem1
GO	membrane	368	6095	6.299e-13	192212	prominin 2	Prom2
GO	membrane	368	6095	6.299e-13	19259	protein tyrosine phosphatase, non-receptor type 5	Ptpn5
GO	membrane	368	6095	6.299e-13	19264	protein tyrosine phosphatase, receptor type, C	Ptprc
GO	membrane	368	6095	6.299e-13	19329	RAB17, member RAS oncogene family	Rab17
GO	membrane	368	6095	6.299e-13	19340	RAB3D, member RAS oncogene family	Rab3d
GO	membrane	368	6095	6.299e-13	193740	heat shock protein 1A	Hspa1a
GO	membrane	368	6095	6.299e-13	19416	RAS, dexamethasone-induced 1	Rasd1
GO	membrane	368	6095	6.299e-13	194597	transmembrane protease, serine 11a	Tmprss11a
GO	membrane	368	6095	6.299e-13	19886	Ros1 proto-oncogene	Ros1
GO	membrane	368	6095	6.299e-13	20014	ribophorin II	Rpn2
GO	membrane	368	6095	6.299e-13	20192	ryanodine receptor 3	Ryr3
GO	membrane	368	6095	6.299e-13	20322	sorbitol dehydrogenase	Sord
GO	membrane	368	6095	6.299e-13	20351	sema domain, immunoglobulin domain (Ig), transmembrane domain (TM) and short cytoplasmic domain, (semaphorin) 4A	Sema4a
GO	membrane	368	6095	6.299e-13	20393	serum/glucocorticoid regulated kinase 1	Sgk1
GO	membrane	368	6095	6.299e-13	20442	ST3 beta-galactoside alpha-2,3-sialyltransferase 1	St3gal1
GO	membrane	368	6095	6.299e-13	20500	solute carrier family 13 (sodium-dependent dicarboxylate transporter), member 2	Slc13a2
GO	membrane	368	6095	6.299e-13	20504	solute carrier family 17 (sodium phosphate), member 1	Slc17a1
GO	membrane	368	6095	6.299e-13	20524	solute carrier family 25 (mitochondrial carrier, peroxisomal membrane protein), member 17	Slc25a17
GO	membrane	368	6095	6.299e-13	20686	sperm autoantigenic protein 17	Spa17
GO	membrane	368	6095	6.299e-13	207495	BAI1-associated protein 2-like 2	Baiap2l2
GO	membrane	368	6095	6.299e-13	207818	small cell adhesion glycoprotein	Smagp
GO	membrane	368	6095	6.299e-13	20832	signal sequence receptor, delta	Ssr4
GO	membrane	368	6095	6.299e-13	20917	succinate-Coenzyme A ligase, GDP-forming, beta subunit	Suclg2
GO	membrane	368	6095	6.299e-13	209588	secreted and transmembrane 1A	Sectm1a
GO	membrane	368	6095	6.299e-13	212539	predicted gene 266	Gm266
GO	membrane	368	6095	6.299e-13	213068	transmembrane protein 71	Tmem71
GO	membrane	368	6095	6.299e-13	214505	N-acetylglucosamine-1-phosphotransferase, gamma subunit	Gnptg
GO	membrane	368	6095	6.299e-13	214523	transmembrane protease, serine 4	Tmprss4
GO	membrane	368	6095	6.299e-13	214531	transmembrane protease, serine 13	Tmprss13
GO	membrane	368	6095	6.299e-13	215303	calcium/calmodulin-dependent protein kinase I gamma	Camk1g
GO	membrane	368	6095	6.299e-13	215446	ectonucleoside triphosphate diphosphohydrolase 3	Entpd3
GO	membrane	368	6095	6.299e-13	216225	solute carrier family 5 (iodide transporter), member 8	Slc5a8
GO	membrane	368	6095	6.299e-13	216350	tetraspanin 8	Tspan8
GO	membrane	368	6095	6.299e-13	217517	syntaxin binding protein 6 (amisyn)	Stxbp6
GO	membrane	368	6095	6.299e-13	217664	mannoside acetylglucosaminyltransferase 2	Mgat2
GO	membrane	368	6095	6.299e-13	217837	inositol 1,3,4-triphosphate 5/6 kinase	Itpk1
GO	membrane	368	6095	6.299e-13	217869	eukaryotic translation initiation factor 5	Eif5
GO	membrane	368	6095	6.299e-13	21817	transglutaminase 2, C polypeptide	Tgm2
GO	membrane	368	6095	6.299e-13	21824	thrombomodulin	Thbd
GO	membrane	368	6095	6.299e-13	218476	glucosaminyl (N-acetyl) transferase 4, core 2 (beta-1,6-N-acetylglucosaminyltransferase)	Gcnt4
GO	membrane	368	6095	6.299e-13	21912	tetraspanin 7	Tspan7
GO	membrane	368	6095	6.299e-13	219135	myotubularin related protein 6	Mtmr6
GO	membrane	368	6095	6.299e-13	21936	tumor necrosis factor receptor superfamily, member 18	Tnfrsf18
GO	membrane	368	6095	6.299e-13	21968	target of myb1 trafficking protein	Tom1
GO	membrane	368	6095	6.299e-13	22095	thyroid stimulating hormone receptor	Tshr
GO	membrane	368	6095	6.299e-13	22238	UDP glucuronosyltransferase 2 family, polypeptide B5	Ugt2b5
GO	membrane	368	6095	6.299e-13	22296	vomeronasal 1 receptor 51	Vmn1r51
GO	membrane	368	6095	6.299e-13	22337	vitamin D (1,25-dihydroxyvitamin D3) receptor	Vdr
GO	membrane	368	6095	6.299e-13	22340	vascular endothelial growth factor B	Vegfb
GO	membrane	368	6095	6.299e-13	22350	ezrin	Ezr
GO	membrane	368	6095	6.299e-13	22368	transient receptor potential cation channel, subfamily V, member 2	Trpv2
GO	membrane	368	6095	6.299e-13	22393	wolframin ER transmembrane glycoprotein	Wfs1
GO	membrane	368	6095	6.299e-13	224022	solute carrier family 7 (cationic amino acid transporter, y+ system), member 4	Slc7a4
GO	membrane	368	6095	6.299e-13	224116	mucin 20	Muc20
GO	membrane	368	6095	6.299e-13	224132	solute carrier family 49 member 4	Slc49a4
GO	membrane	368	6095	6.299e-13	224454	zinc finger, DHHC domain containing 14	Zdhhc14
GO	membrane	368	6095	6.299e-13	22598	solute carrier family 6 (neurotransmitter transporter), member 18	Slc6a18
GO	membrane	368	6095	6.299e-13	226040	transmembrane protein 252	Tmem252
GO	membrane	368	6095	6.299e-13	226143	cytochrome P450, family 2, subfamily c, polypeptide 23	Cyp2c23
GO	membrane	368	6095	6.299e-13	226250	actin filament associated protein 1-like 2	Afap1l2
GO	membrane	368	6095	6.299e-13	22626	solute carrier family 23 (nucleobase transporters), member 3	Slc23a3
GO	membrane	368	6095	6.299e-13	226499	odr4 GPCR localization factor homolog	Odr4
GO	membrane	368	6095	6.299e-13	226777	RIKEN cDNA C130074G19 gene	C130074G19Rik
GO	membrane	368	6095	6.299e-13	226844	feline leukemia virus subgroup C cellular receptor 1	Flvcr1
GO	membrane	368	6095	6.299e-13	226849	protein phosphatase 2, regulatory subunit B', alpha	Ppp2r5a
GO	membrane	368	6095	6.299e-13	227801	DENN/MADD domain containing 1A	Dennd1a
GO	membrane	368	6095	6.299e-13	22785	solute carrier family 30 (zinc transporter), member 4	Slc30a4
GO	membrane	368	6095	6.299e-13	228859	fat storage-inducing transmembrane protein 2	Fitm2
GO	membrane	368	6095	6.299e-13	229722	endosome-lysosome associated apoptosis and autophagy regulator 1	Elapor1
GO	membrane	368	6095	6.299e-13	230678	transmembrane protein 125	Tmem125
GO	membrane	368	6095	6.299e-13	231602	purinergic receptor P2X, ligand-gated ion channel, 2	P2rx2
GO	membrane	368	6095	6.299e-13	232232	histone deacetylase 11	Hdac11
GO	membrane	368	6095	6.299e-13	232984	UDP-GlcNAc:betaGal beta-1,3-N-acetylglucosaminyltransferase 8	B3gnt8
GO	membrane	368	6095	6.299e-13	238257	transmembrane protein 30B	Tmem30b
GO	membrane	368	6095	6.299e-13	23945	monoglyceride lipase	Mgll
GO	membrane	368	6095	6.299e-13	23984	phosphodiesterase 10A	Pde10a
GO	membrane	368	6095	6.299e-13	240638	solute carrier family 16 (monocarboxylic acid transporters), member 12	Slc16a12
GO	membrane	368	6095	6.299e-13	24109	ubiquitin-like 3	Ubl3
GO	membrane	368	6095	6.299e-13	241452	dehydrogenase/reductase (SDR family) member 9	Dhrs9
GO	membrane	368	6095	6.299e-13	242126	solute carrier family 22 (organic anion/cation transporter), member 15	Slc22a15
GO	membrane	368	6095	6.299e-13	244886	transmembrane protein 266	Tmem266
GO	membrane	368	6095	6.299e-13	245050	golgi associated kinase 1A	Gask1a
GO	membrane	368	6095	6.299e-13	245386	transmembrane protein 255A	Tmem255a
GO	membrane	368	6095	6.299e-13	245527	ectodysplasin A2 receptor	Eda2r
GO	membrane	368	6095	6.299e-13	246133	potassium voltage-gated channel, Isk-related subfamily, gene 2	Kcne2
GO	membrane	368	6095	6.299e-13	246696	solute carrier family 25, member 28	Slc25a28
GO	membrane	368	6095	6.299e-13	26434	prion like protein doppel	Prnd
GO	membrane	368	6095	6.299e-13	268534	syntrophin, gamma 2	Sntg2
GO	membrane	368	6095	6.299e-13	269116	neurofascin	Nfasc
GO	membrane	368	6095	6.299e-13	269346	solute carrier family 28 (sodium-coupled nucleoside transporter), member 2	Slc28a2
GO	membrane	368	6095	6.299e-13	270066	solute carrier family 35, member E1	Slc35e1
GO	membrane	368	6095	6.299e-13	270166	caseinolytic mitochondrial matrix peptidase chaperone subunit	Clpx
GO	membrane	368	6095	6.299e-13	27411	solute carrier family 14 (urea transporter), member 2	Slc14a2
GO	membrane	368	6095	6.299e-13	27973	vitamin K epoxide reductase complex, subunit 1	Vkorc1
GO	membrane	368	6095	6.299e-13	28146	stress-associated endoplasmic reticulum protein 1	Serp1
GO	membrane	368	6095	6.299e-13	29820	tumor necrosis factor receptor superfamily, member 19	Tnfrsf19
GO	membrane	368	6095	6.299e-13	30936	solute carrier family 46, member 2	Slc46a2
GO	membrane	368	6095	6.299e-13	30960	vesicle-associated membrane protein, associated protein A	Vapa
GO	membrane	368	6095	6.299e-13	319446	dipeptidase 2	Dpep2
GO	membrane	368	6095	6.299e-13	319832	transmembrane protein 229A	Tmem229a
GO	membrane	368	6095	6.299e-13	319848	solute carrier family 17 (sodium phosphate), member 4	Slc17a4
GO	membrane	368	6095	6.299e-13	320541	solute carrier family 35, member E2	Slc35e2
GO	membrane	368	6095	6.299e-13	320635	cytochrome b5 reductase 2	Cyb5r2
GO	membrane	368	6095	6.299e-13	320782	transmembrane protein 154	Tmem154
GO	membrane	368	6095	6.299e-13	328035	fatty acid desaturase domain family, member 6	Fads6
GO	membrane	368	6095	6.299e-13	328779	heparan sulfate (glucosamine) 3-O-sulfotransferase 6	Hs3st6
GO	membrane	368	6095	6.299e-13	338320	MIA SH3 domain ER export factor 2	Mia2
GO	membrane	368	6095	6.299e-13	338365	solute carrier family 41, member 2	Slc41a2
GO	membrane	368	6095	6.299e-13	338369	transmembrane protein 220	Tmem220
GO	membrane	368	6095	6.299e-13	380711	RAP1 GTPase activating protein 2	Rap1gap2
GO	membrane	368	6095	6.299e-13	381310	mechanosensory transduction mediator	Stum
GO	membrane	368	6095	6.299e-13	381629	all-trans retinoic acid induced differentiation factor	Atraid
GO	membrane	368	6095	6.299e-13	384783	insulin receptor substrate 2	Irs2
GO	membrane	368	6095	6.299e-13	396184	fibronectin leucine rich transmembrane protein 1	Flrt1
GO	membrane	368	6095	6.299e-13	407243	transmembrane protein 189	Tmem189
GO	membrane	368	6095	6.299e-13	433323	sphingosine-1-phosphate phosphatase 2	Sgpp2
GO	membrane	368	6095	6.299e-13	50778	regulator of G-protein signaling 1	Rgs1
GO	membrane	368	6095	6.299e-13	52064	coenzyme Q5 methyltransferase	Coq5
GO	membrane	368	6095	6.299e-13	52637	CDGSH iron sulfur domain 1	Cisd1
GO	membrane	368	6095	6.299e-13	52837	thioredoxin-related transmembrane protein 4	Tmx4
GO	membrane	368	6095	6.299e-13	53322	nucleobindin 2	Nucb2
GO	membrane	368	6095	6.299e-13	53625	UDP-GlcNAc:betaGal beta-1,3-N-acetylglucosaminyltransferase 2	B3gnt2
GO	membrane	368	6095	6.299e-13	53881	solute carrier family 5 (inositol transporters), member 3	Slc5a3
GO	membrane	368	6095	6.299e-13	54167	inducible T cell co-stimulator	Icos
GO	membrane	368	6095	6.299e-13	54326	elongation of very long chain fatty acids (FEN1/Elo2, SUR4/Elo3, yeast)-like 2	Elovl2
GO	membrane	368	6095	6.299e-13	54405	NADH:ubiquinone oxidoreductase subunit A1	Ndufa1
GO	membrane	368	6095	6.299e-13	54445	unc-93 homolog B1, TLR signaling regulator	Unc93b1
GO	membrane	368	6095	6.299e-13	54710	heparan sulfate (glucosamine) 3-O-sulfotransferase 3B1	Hs3st3b1
GO	membrane	368	6095	6.299e-13	56045	SAM domain and HD domain, 1	Samhd1
GO	membrane	368	6095	6.299e-13	56175	beta-site APP-cleaving enzyme 2	Bace2
GO	membrane	368	6095	6.299e-13	56298	atlastin GTPase 2	Atl2
GO	membrane	368	6095	6.299e-13	56349	neuroepithelial cell transforming gene 1	Net1
GO	membrane	368	6095	6.299e-13	56357	isovaleryl coenzyme A dehydrogenase	Ivd
GO	membrane	368	6095	6.299e-13	56437	Ras-related associated with diabetes	Rrad
GO	membrane	368	6095	6.299e-13	56440	sorting nexin 1	Snx1
GO	membrane	368	6095	6.299e-13	56443	actin related protein 2/3 complex, subunit 1A	Arpc1a
GO	membrane	368	6095	6.299e-13	56529	SEC11 homolog A, signal peptidase complex subunit	Sec11a
GO	membrane	368	6095	6.299e-13	56786	TMEM9 domain family, member B	Tmem9b
GO	membrane	368	6095	6.299e-13	56807	secretory carrier membrane protein 5	Scamp5
GO	membrane	368	6095	6.299e-13	57377	mannosyl-oligosaccharide glucosidase	Mogs
GO	membrane	368	6095	6.299e-13	57911	gasdermin A	Gsdma
GO	membrane	368	6095	6.299e-13	58210	secreted and transmembrane 1B	Sectm1b
GO	membrane	368	6095	6.299e-13	59045	START domain containing 3	Stard3
GO	membrane	368	6095	6.299e-13	59048	C1GALT1-specific chaperone 1	C1galt1c1
GO	membrane	368	6095	6.299e-13	64051	synaptic vesicle glycoprotein 2 a	Sv2a
GO	membrane	368	6095	6.299e-13	64136	stromal cell-derived factor 2-like 1	Sdf2l1
GO	membrane	368	6095	6.299e-13	64176	synaptic vesicle glycoprotein 2 b	Sv2b
GO	membrane	368	6095	6.299e-13	64291	oxysterol binding protein-like 1A	Osbpl1a
GO	membrane	368	6095	6.299e-13	64540	tetraspanin 4	Tspan4
GO	membrane	368	6095	6.299e-13	66046	NADH:ubiquinone oxidoreductase subunit B5	Ndufb5
GO	membrane	368	6095	6.299e-13	66059	keratinocyte associated protein 2	Krtcap2
GO	membrane	368	6095	6.299e-13	66109	tetraspanin 13	Tspan13
GO	membrane	368	6095	6.299e-13	66111	transmembrane p24 trafficking protein 3	Tmed3
GO	membrane	368	6095	6.299e-13	66120	FK506 binding protein 11	Fkbp11
GO	membrane	368	6095	6.299e-13	66179	2-oxoglutarate and iron-dependent oxygenase domain containing 3	Ogfod3
GO	membrane	368	6095	6.299e-13	66191	immediate early response 3 interacting protein 1	Ier3ip1
GO	membrane	368	6095	6.299e-13	66251	ADP-ribosylation factor GTPase activating protein 3	Arfgap3
GO	membrane	368	6095	6.299e-13	66269	transmembrane p24 trafficking protein 6	Tmed6
GO	membrane	368	6095	6.299e-13	66286	SEC11 homolog C, signal peptidase complex subunit	Sec11c
GO	membrane	368	6095	6.299e-13	66340	presenilin enhancer gamma secretase subunit	Psenen
GO	membrane	368	6095	6.299e-13	66352	basic leucine zipper nuclear factor 1	Blzf1
GO	membrane	368	6095	6.299e-13	66357	oligosaccharyltransferase complex subunit (non-catalytic)	Ostc
GO	membrane	368	6095	6.299e-13	66412	arrestin domain containing 4	Arrdc4
GO	membrane	368	6095	6.299e-13	66451	RIKEN cDNA 2610528J11 gene	2610528J11Rik
GO	membrane	368	6095	6.299e-13	66459	Pigy upstream reading frame	Pyurf
GO	membrane	368	6095	6.299e-13	66483	ribosomal protein L36A-like	Rpl36al
GO	membrane	368	6095	6.299e-13	66694	ubiquinol-cytochrome c reductase, Rieske iron-sulfur polypeptide 1	Uqcrfs1
GO	membrane	368	6095	6.299e-13	667742	piezo-type mechanosensitive ion channel component 2	Piezo2
GO	membrane	368	6095	6.299e-13	66815	mitochondrial calcium uniporter dominant negative beta subunit	Mcub
GO	membrane	368	6095	6.299e-13	66910	transmembrane protein 107	Tmem107
GO	membrane	368	6095	6.299e-13	66925	succinate dehydrogenase complex, subunit D, integral membrane protein	Sdhd
GO	membrane	368	6095	6.299e-13	67075	magnesium transporter 1	Magt1
GO	membrane	368	6095	6.299e-13	67077	cation channel sperm associated auxiliary subunit zeta	Catsperz
GO	membrane	368	6095	6.299e-13	67080	RIKEN cDNA 1700019D03 gene	1700019D03Rik
GO	membrane	368	6095	6.299e-13	67092	glycine amidinotransferase (L-arginine:glycine amidinotransferase)	Gatm
GO	membrane	368	6095	6.299e-13	67111	N-acylethanolamine acid amidase	Naaa
GO	membrane	368	6095	6.299e-13	67216	membrane bound O-acyltransferase domain containing 2	Mboat2
GO	membrane	368	6095	6.299e-13	67270	mitochondrial ribosomal protein L42	Mrpl42
GO	membrane	368	6095	6.299e-13	67456	ERGIC and golgi 2	Ergic2
GO	membrane	368	6095	6.299e-13	67473	solute carrier family 47, member 1	Slc47a1
GO	membrane	368	6095	6.299e-13	67490	UFM1 specific ligase 1	Ufl1
GO	membrane	368	6095	6.299e-13	67602	NECAP endocytosis associated 1	Necap1
GO	membrane	368	6095	6.299e-13	67630	sterile alpha motif domain containing 8	Samd8
GO	membrane	368	6095	6.299e-13	67664	ring finger protein 125	Rnf125
GO	membrane	368	6095	6.299e-13	67713	DnaJ heat shock protein family (Hsp40) member C19	Dnajc19
GO	membrane	368	6095	6.299e-13	67804	sorting nexin 2	Snx2
GO	membrane	368	6095	6.299e-13	67887	store-operated calcium entry-associated regulatory factor	Saraf
GO	membrane	368	6095	6.299e-13	67893	transmembrane protein 86A	Tmem86a
GO	membrane	368	6095	6.299e-13	68202	NADH:ubiquinone oxidoreductase subunit A5	Ndufa5
GO	membrane	368	6095	6.299e-13	68212	transmembrane BAX inhibitor motif containing 4	Tmbim4
GO	membrane	368	6095	6.299e-13	68262	1-acylglycerol-3-phosphate O-acyltransferase 4 (lysophosphatidic acid acyltransferase, delta)	Agpat4
GO	membrane	368	6095	6.299e-13	68316	apolipoprotein O	Apoo
GO	membrane	368	6095	6.299e-13	68552	small integral membrane protein 14	Smim14
GO	membrane	368	6095	6.299e-13	68581	transmembrane p24 trafficking protein 10	Tmed10
GO	membrane	368	6095	6.299e-13	68616	glycerophosphodiester phosphodiesterase domain containing 3	Gdpd3
GO	membrane	368	6095	6.299e-13	68936	small integral membrane protein 11	Smim11
GO	membrane	368	6095	6.299e-13	68939	RAS-like, family 11, member B	Rasl11b
GO	membrane	368	6095	6.299e-13	68947	carbohydrate sulfotransferase 8	Chst8
GO	membrane	368	6095	6.299e-13	69038	transmembrane protein 258	Tmem258
GO	membrane	368	6095	6.299e-13	69047	ATPase, Ca++ transporting, type 2C, member 2	Atp2c2
GO	membrane	368	6095	6.299e-13	69137	V-set and transmembrane domain containing 5	Vstm5
GO	membrane	368	6095	6.299e-13	69226	sorting nexing 24	Snx24
GO	membrane	368	6095	6.299e-13	69568	vitamin K epoxide reductase complex, subunit 1-like 1	Vkorc1l1
GO	membrane	368	6095	6.299e-13	69806	solute carrier family 39 (metal ion transporter), member 11	Slc39a11
GO	membrane	368	6095	6.299e-13	70059	delta(4)-desaturase, sphingolipid 2	Degs2
GO	membrane	368	6095	6.299e-13	70361	lectin, mannose-binding, 1	Lman1
GO	membrane	368	6095	6.299e-13	70456	mitochondrial pyruvate carrier 2	Mpc2
GO	membrane	368	6095	6.299e-13	70556	solute carrier family 25, member 33	Slc25a33
GO	membrane	368	6095	6.299e-13	71764	C2 calcium-dependent domain containing 2-like	C2cd2l
GO	membrane	368	6095	6.299e-13	71816	ring finger protein 180	Rnf180
GO	membrane	368	6095	6.299e-13	71881	adipocyte plasma membrane associated protein	Apmap
GO	membrane	368	6095	6.299e-13	71897	LY6/PLAUR domain containing 6B	Lypd6b
GO	membrane	368	6095	6.299e-13	71927	integrin alpha FG-GAP repeat containing 1	Itfg1
GO	membrane	368	6095	6.299e-13	71998	solute carrier family 25, member 35	Slc25a35
GO	membrane	368	6095	6.299e-13	72022	solute carrier family 35, member F2	Slc35f2
GO	membrane	368	6095	6.299e-13	72125	APC membrane recruitment 2	Amer2
GO	membrane	368	6095	6.299e-13	72278	cell cycle progression 1	Ccpg1
GO	membrane	368	6095	6.299e-13	72393	Fas apoptotic inhibitory molecule 2	Faim2
GO	membrane	368	6095	6.299e-13	72399	BRCA1 associated protein	Brap
GO	membrane	368	6095	6.299e-13	73024	ER membrane protein complex subunit 7	Emc7
GO	membrane	368	6095	6.299e-13	74032	short chain dehydrogenase/reductase family 42E, member 1	Sdr42e1
GO	membrane	368	6095	6.299e-13	74043	peroxisomal biogenesis factor 26	Pex26
GO	membrane	368	6095	6.299e-13	74104	ATP-binding cassette, sub-family B (MDR/TAP), member 6	Abcb6
GO	membrane	368	6095	6.299e-13	74134	cytochrome P450, family 2, subfamily s, polypeptide 1	Cyp2s1
GO	membrane	368	6095	6.299e-13	74253	killer cell lectin-like receptor subfamily G, member 2	Klrg2
GO	membrane	368	6095	6.299e-13	74568	mixed lineage kinase domain-like	Mlkl
GO	membrane	368	6095	6.299e-13	74718	sorting nexin 16	Snx16
GO	membrane	368	6095	6.299e-13	75985	RAB30, member RAS oncogene family	Rab30
GO	membrane	368	6095	6.299e-13	76071	janus kinase and microtubule interacting protein 1	Jakmip1
GO	membrane	368	6095	6.299e-13	76192	abhydrolase domain containing 12	Abhd12
GO	membrane	368	6095	6.299e-13	76299	endoplasmic reticulum protein 44	Erp44
GO	membrane	368	6095	6.299e-13	76408	ATP-binding cassette, sub-family C (CFTR/MRP), member 3	Abcc3
GO	membrane	368	6095	6.299e-13	76560	protease, serine 8 (prostasin)	Prss8
GO	membrane	368	6095	6.299e-13	76630	STAM binding protein like 1	Stambpl1
GO	membrane	368	6095	6.299e-13	76942	Ly6/Plaur domain containing 5	Lypd5
GO	membrane	368	6095	6.299e-13	77596	adhesion G protein-coupled receptor F1	Adgrf1
GO	membrane	368	6095	6.299e-13	77975	transmembrane protein 50B	Tmem50b
GO	membrane	368	6095	6.299e-13	78308	G protein-coupled receptor 108	Gpr108
GO	membrane	368	6095	6.299e-13	78688	nucleolar protein 3 (apoptosis repressor with CARD domain)	Nol3
GO	membrane	368	6095	6.299e-13	78830	solute carrier family 25 (mitochondrial carrier, Aralar), member 12	Slc25a12
GO	membrane	368	6095	6.299e-13	78885	coronin 7	Coro7
GO	membrane	368	6095	6.299e-13	79235	lecithin-retinol acyltransferase (phosphatidylcholine-retinol-O-acyltransferase)	Lrat
GO	membrane	368	6095	6.299e-13	83409	late endosomal/lysosomal adaptor, MAPK and MTOR activator 2	Lamtor2
GO	membrane	368	6095	6.299e-13	94219	cyclin M2	Cnnm2
GO	membrane	368	6095	6.299e-13	94284	UDP glucuronosyltransferase 1 family, polypeptide A6A	Ugt1a6a
GO	membrane	368	6095	6.299e-13	96957	transmembrane protein 62	Tmem62
GO	membrane	368	6095	6.299e-13	98363	EF hand domain containing 1	Efhd1
GO	oxidoreductase activity	68	622	1.19713e-11	100198	hexose-6-phosphate dehydrogenase (glucose 1-dehydrogenase)	H6pd
GO	oxidoreductase activity	68	622	1.19713e-11	104776	aldehyde dehydrogenase family 6, subfamily A1	Aldh6a1
GO	oxidoreductase activity	68	622	1.19713e-11	104923	acireductone dioxygenase 1	Adi1
GO	oxidoreductase activity	68	622	1.19713e-11	105349	aldo-keto reductase family 1, member C18	Akr1c18
GO	oxidoreductase activity	68	622	1.19713e-11	105387	aldo-keto reductase family 1, member C14	Akr1c14
GO	oxidoreductase activity	68	622	1.19713e-11	107585	deiodinase, iodothyronine type III	Dio3
GO	oxidoreductase activity	68	622	1.19713e-11	108156	methylenetetrahydrofolate dehydrogenase (NADP+ dependent), methenyltetrahydrofolate cyclohydrolase, formyltetrahydrofolate synthase	Mthfd1
GO	oxidoreductase activity	68	622	1.19713e-11	110265	methionine sulfoxide reductase A	Msra
GO	oxidoreductase activity	68	622	1.19713e-11	110695	aldehyde dehydrogenase family 7, member A1	Aldh7a1
GO	oxidoreductase activity	68	622	1.19713e-11	110842	electron transferring flavoprotein, alpha polypeptide	Etfa
GO	oxidoreductase activity	68	622	1.19713e-11	112407	egl-9 family hypoxia-inducible factor 3	Egln3
GO	oxidoreductase activity	68	622	1.19713e-11	11430	acyl-Coenzyme A oxidase 1, palmitoyl	Acox1
GO	oxidoreductase activity	68	622	1.19713e-11	11522	alcohol dehydrogenase 1 (class I)	Adh1
GO	oxidoreductase activity	68	622	1.19713e-11	11671	aldehyde dehydrogenase family 3, subfamily A2	Aldh3a2
GO	oxidoreductase activity	68	622	1.19713e-11	11757	peroxiredoxin 3	Prdx3
GO	oxidoreductase activity	68	622	1.19713e-11	11997	aldo-keto reductase family 1, member B7	Akr1b7
GO	oxidoreductase activity	68	622	1.19713e-11	12858	cytochrome c oxidase subunit 5A	Cox5a
GO	oxidoreductase activity	68	622	1.19713e-11	13063	cytochrome c, somatic	Cycs
GO	oxidoreductase activity	68	622	1.19713e-11	13074	cytochrome P450, family 17, subfamily a, polypeptide 1	Cyp17a1
GO	oxidoreductase activity	68	622	1.19713e-11	13082	cytochrome P450, family 26, subfamily a, polypeptide 1	Cyp26a1
GO	oxidoreductase activity	68	622	1.19713e-11	13116	cytochrome P450, family 46, subfamily a, polypeptide 1	Cyp46a1
GO	oxidoreductase activity	68	622	1.19713e-11	14148	ferredoxin 1	Fdx1
GO	oxidoreductase activity	68	622	1.19713e-11	14187	aldo-keto reductase family 1, member B8	Akr1b8
GO	oxidoreductase activity	68	622	1.19713e-11	14661	glutamate dehydrogenase 1	Glud1
GO	oxidoreductase activity	68	622	1.19713e-11	14778	glutathione peroxidase 3	Gpx3
GO	oxidoreductase activity	68	622	1.19713e-11	14869	glutathione S-transferase, pi 2	Gstp2
GO	oxidoreductase activity	68	622	1.19713e-11	14870	glutathione S-transferase, pi 1	Gstp1
GO	oxidoreductase activity	68	622	1.19713e-11	15483	hydroxysteroid 11-beta dehydrogenase 1	Hsd11b1
GO	oxidoreductase activity	68	622	1.19713e-11	16922	phytanoyl-CoA hydroxylase	Phyh
GO	oxidoreductase activity	68	622	1.19713e-11	170728	reticulon 4 interacting protein 1	Rtn4ip1
GO	oxidoreductase activity	68	622	1.19713e-11	17252	retinol dehydrogenase 11	Rdh11
GO	oxidoreductase activity	68	622	1.19713e-11	17436	malic enzyme 1, NADP(+)-dependent, cytosolic	Me1
GO	oxidoreductase activity	68	622	1.19713e-11	17449	malate dehydrogenase 1, NAD (soluble)	Mdh1
GO	oxidoreductase activity	68	622	1.19713e-11	18453	prolyl 4-hydroxylase, beta polypeptide	P4hb
GO	oxidoreductase activity	68	622	1.19713e-11	19125	proline dehydrogenase	Prodh
GO	oxidoreductase activity	68	622	1.19713e-11	19378	aldehyde dehydrogenase family 1, subfamily A2	Aldh1a2
GO	oxidoreductase activity	68	622	1.19713e-11	20135	ribonucleotide reductase M2	Rrm2
GO	oxidoreductase activity	68	622	1.19713e-11	20322	sorbitol dehydrogenase	Sord
GO	oxidoreductase activity	68	622	1.19713e-11	20917	succinate-Coenzyme A ligase, GDP-forming, beta subunit	Suclg2
GO	oxidoreductase activity	68	622	1.19713e-11	22235	UDP-glucose dehydrogenase	Ugdh
GO	oxidoreductase activity	68	622	1.19713e-11	226143	cytochrome P450, family 2, subfamily c, polypeptide 23	Cyp2c23
GO	oxidoreductase activity	68	622	1.19713e-11	232223	thioredoxin reductase 3	Txnrd3
GO	oxidoreductase activity	68	622	1.19713e-11	241452	dehydrogenase/reductase (SDR family) member 9	Dhrs9
GO	oxidoreductase activity	68	622	1.19713e-11	27361	methionine sulfoxide reductase B1	Msrb1
GO	oxidoreductase activity	68	622	1.19713e-11	27973	vitamin K epoxide reductase complex, subunit 1	Vkorc1
GO	oxidoreductase activity	68	622	1.19713e-11	320635	cytochrome b5 reductase 2	Cyb5r2
GO	oxidoreductase activity	68	622	1.19713e-11	328035	fatty acid desaturase domain family, member 6	Fads6
GO	oxidoreductase activity	68	622	1.19713e-11	407243	transmembrane protein 189	Tmem189
GO	oxidoreductase activity	68	622	1.19713e-11	52700	thioredoxin domain containing 17	Txndc17
GO	oxidoreductase activity	68	622	1.19713e-11	56357	isovaleryl coenzyme A dehydrogenase	Ivd
GO	oxidoreductase activity	68	622	1.19713e-11	58875	3-hydroxyisobutyrate dehydrogenase	Hibadh
GO	oxidoreductase activity	68	622	1.19713e-11	65972	interferon gamma inducible protein 30	Ifi30
GO	oxidoreductase activity	68	622	1.19713e-11	66071	ethylmalonic encephalopathy 1	Ethe1
GO	oxidoreductase activity	68	622	1.19713e-11	66179	2-oxoglutarate and iron-dependent oxygenase domain containing 3	Ogfod3
GO	oxidoreductase activity	68	622	1.19713e-11	66609	crystallin, zeta (quinone reductase)-like 1	Cryzl1
GO	oxidoreductase activity	68	622	1.19713e-11	66694	ubiquinol-cytochrome c reductase, Rieske iron-sulfur polypeptide 1	Uqcrfs1
GO	oxidoreductase activity	68	622	1.19713e-11	66885	acyl-Coenzyme A dehydrogenase, short/branched chain	Acadsb
GO	oxidoreductase activity	68	622	1.19713e-11	66925	succinate dehydrogenase complex, subunit D, integral membrane protein	Sdhd
GO	oxidoreductase activity	68	622	1.19713e-11	68202	NADH:ubiquinone oxidoreductase subunit A5	Ndufa5
GO	oxidoreductase activity	68	622	1.19713e-11	69568	vitamin K epoxide reductase complex, subunit 1-like 1	Vkorc1l1
GO	oxidoreductase activity	68	622	1.19713e-11	70059	delta(4)-desaturase, sphingolipid 2	Degs2
GO	oxidoreductase activity	68	622	1.19713e-11	71985	acyl-Coenzyme A dehydrogenase family, member 10	Acad10
GO	oxidoreductase activity	68	622	1.19713e-11	74032	short chain dehydrogenase/reductase family 42E, member 1	Sdr42e1
GO	oxidoreductase activity	68	622	1.19713e-11	74134	cytochrome P450, family 2, subfamily s, polypeptide 1	Cyp2s1
GO	oxidoreductase activity	68	622	1.19713e-11	75512	glutathione peroxidase 6	Gpx6
GO	oxidoreductase activity	68	622	1.19713e-11	76650	sulfiredoxin 1 homolog (S. cerevisiae)	Srxn1
GO	oxidoreductase activity	68	622	1.19713e-11	77974	retinol dehydrogenase 12	Rdh12
GO	oxidoreductase activity	68	622	1.19713e-11	97820	RIKEN cDNA 4833439L19 gene	4833439L19Rik
GO	endoplasmic reticulum	113	1359	1.13829e-10	100198	hexose-6-phosphate dehydrogenase (glucose 1-dehydrogenase)	H6pd
GO	endoplasmic reticulum	113	1359	1.13829e-10	107513	signal sequence receptor, alpha	Ssr1
GO	endoplasmic reticulum	113	1359	1.13829e-10	107569	5'-nucleotidase, cytosolic III	Nt5c3
GO	endoplasmic reticulum	113	1359	1.13829e-10	108687	ER degradation enhancer, mannosidase alpha-like 2	Edem2
GO	endoplasmic reticulum	113	1359	1.13829e-10	110172	solute carrier family 35, member B1	Slc35b1
GO	endoplasmic reticulum	113	1359	1.13829e-10	11416	solute carrier family 33 (acetyl-CoA transporter), member 1	Slc33a1
GO	endoplasmic reticulum	113	1359	1.13829e-10	11671	aldehyde dehydrogenase family 3, subfamily A2	Aldh3a2
GO	endoplasmic reticulum	113	1359	1.13829e-10	11827	aquaporin 2	Aqp2
GO	endoplasmic reticulum	113	1359	1.13829e-10	11830	aquaporin 5	Aqp5
GO	endoplasmic reticulum	113	1359	1.13829e-10	11979	ATPase, Cu++ transporting, beta polypeptide	Atp7b
GO	endoplasmic reticulum	113	1359	1.13829e-10	12068	Bet1 golgi vesicular membrane trafficking protein	Bet1
GO	endoplasmic reticulum	113	1359	1.13829e-10	12292	calcium channel, voltage-dependent, L type, alpha 1S subunit	Cacna1s
GO	endoplasmic reticulum	113	1359	1.13829e-10	12351	carbonic anhydrase 4	Car4
GO	endoplasmic reticulum	113	1359	1.13829e-10	12491	CD36 molecule	Cd36
GO	endoplasmic reticulum	113	1359	1.13829e-10	12499	ectonucleoside triphosphate diphosphohydrolase 5	Entpd5
GO	endoplasmic reticulum	113	1359	1.13829e-10	13074	cytochrome P450, family 17, subfamily a, polypeptide 1	Cyp17a1
GO	endoplasmic reticulum	113	1359	1.13829e-10	13082	cytochrome P450, family 26, subfamily a, polypeptide 1	Cyp26a1
GO	endoplasmic reticulum	113	1359	1.13829e-10	13116	cytochrome P450, family 46, subfamily a, polypeptide 1	Cyp46a1
GO	endoplasmic reticulum	113	1359	1.13829e-10	13480	dolichol-phosphate (beta-D) mannosyltransferase 1	Dpm1
GO	endoplasmic reticulum	113	1359	1.13829e-10	13488	dopamine receptor D1	Drd1
GO	endoplasmic reticulum	113	1359	1.13829e-10	14161	fibrinogen alpha chain	Fga
GO	endoplasmic reticulum	113	1359	1.13829e-10	14227	FK506 binding protein 2	Fkbp2
GO	endoplasmic reticulum	113	1359	1.13829e-10	15064	major histocompatibility complex, class I-related	Mr1
GO	endoplasmic reticulum	113	1359	1.13829e-10	15483	hydroxysteroid 11-beta dehydrogenase 1	Hsd11b1
GO	endoplasmic reticulum	113	1359	1.13829e-10	17155	mannosidase 1, alpha	Man1a
GO	endoplasmic reticulum	113	1359	1.13829e-10	17252	retinol dehydrogenase 11	Rdh11
GO	endoplasmic reticulum	113	1359	1.13829e-10	18212	neurotrophic tyrosine kinase, receptor, type 2	Ntrk2
GO	endoplasmic reticulum	113	1359	1.13829e-10	18220	nucleobindin 1	Nucb1
GO	endoplasmic reticulum	113	1359	1.13829e-10	18453	prolyl 4-hydroxylase, beta polypeptide	P4hb
GO	endoplasmic reticulum	113	1359	1.13829e-10	18618	phosphatidylethanolamine N-methyltransferase	Pemt
GO	endoplasmic reticulum	113	1359	1.13829e-10	18812	prolactin family 2, subfamily c, member 3	Prl2c3
GO	endoplasmic reticulum	113	1359	1.13829e-10	19123	protein C	Proc
GO	endoplasmic reticulum	113	1359	1.13829e-10	192169	UFM1-specific peptidase 2	Ufsp2
GO	endoplasmic reticulum	113	1359	1.13829e-10	192193	ER degradation enhancer, mannosidase alpha-like 1	Edem1
GO	endoplasmic reticulum	113	1359	1.13829e-10	19259	protein tyrosine phosphatase, non-receptor type 5	Ptpn5
GO	endoplasmic reticulum	113	1359	1.13829e-10	19416	RAS, dexamethasone-induced 1	Rasd1
GO	endoplasmic reticulum	113	1359	1.13829e-10	20014	ribophorin II	Rpn2
GO	endoplasmic reticulum	113	1359	1.13829e-10	20192	ryanodine receptor 3	Ryr3
GO	endoplasmic reticulum	113	1359	1.13829e-10	20393	serum/glucocorticoid regulated kinase 1	Sgk1
GO	endoplasmic reticulum	113	1359	1.13829e-10	20832	signal sequence receptor, delta	Ssr4
GO	endoplasmic reticulum	113	1359	1.13829e-10	219135	myotubularin related protein 6	Mtmr6
GO	endoplasmic reticulum	113	1359	1.13829e-10	22238	UDP glucuronosyltransferase 2 family, polypeptide B5	Ugt2b5
GO	endoplasmic reticulum	113	1359	1.13829e-10	22393	wolframin ER transmembrane glycoprotein	Wfs1
GO	endoplasmic reticulum	113	1359	1.13829e-10	224454	zinc finger, DHHC domain containing 14	Zdhhc14
GO	endoplasmic reticulum	113	1359	1.13829e-10	225579	solute carrier family 27 (fatty acid transporter), member 6	Slc27a6
GO	endoplasmic reticulum	113	1359	1.13829e-10	226143	cytochrome P450, family 2, subfamily c, polypeptide 23	Cyp2c23
GO	endoplasmic reticulum	113	1359	1.13829e-10	228859	fat storage-inducing transmembrane protein 2	Fitm2
GO	endoplasmic reticulum	113	1359	1.13829e-10	232223	thioredoxin reductase 3	Txnrd3
GO	endoplasmic reticulum	113	1359	1.13829e-10	232984	UDP-GlcNAc:betaGal beta-1,3-N-acetylglucosaminyltransferase 8	B3gnt8
GO	endoplasmic reticulum	113	1359	1.13829e-10	238257	transmembrane protein 30B	Tmem30b
GO	endoplasmic reticulum	113	1359	1.13829e-10	241452	dehydrogenase/reductase (SDR family) member 9	Dhrs9
GO	endoplasmic reticulum	113	1359	1.13829e-10	245050	golgi associated kinase 1A	Gask1a
GO	endoplasmic reticulum	113	1359	1.13829e-10	246133	potassium voltage-gated channel, Isk-related subfamily, gene 2	Kcne2
GO	endoplasmic reticulum	113	1359	1.13829e-10	27973	vitamin K epoxide reductase complex, subunit 1	Vkorc1
GO	endoplasmic reticulum	113	1359	1.13829e-10	28146	stress-associated endoplasmic reticulum protein 1	Serp1
GO	endoplasmic reticulum	113	1359	1.13829e-10	30933	torsin family 2, member A	Tor2a
GO	endoplasmic reticulum	113	1359	1.13829e-10	30960	vesicle-associated membrane protein, associated protein A	Vapa
GO	endoplasmic reticulum	113	1359	1.13829e-10	338320	MIA SH3 domain ER export factor 2	Mia2
GO	endoplasmic reticulum	113	1359	1.13829e-10	396184	fibronectin leucine rich transmembrane protein 1	Flrt1
GO	endoplasmic reticulum	113	1359	1.13829e-10	407243	transmembrane protein 189	Tmem189
GO	endoplasmic reticulum	113	1359	1.13829e-10	433323	sphingosine-1-phosphate phosphatase 2	Sgpp2
GO	endoplasmic reticulum	113	1359	1.13829e-10	53322	nucleobindin 2	Nucb2
GO	endoplasmic reticulum	113	1359	1.13829e-10	53625	UDP-GlcNAc:betaGal beta-1,3-N-acetylglucosaminyltransferase 2	B3gnt2
GO	endoplasmic reticulum	113	1359	1.13829e-10	54326	elongation of very long chain fatty acids (FEN1/Elo2, SUR4/Elo3, yeast)-like 2	Elovl2
GO	endoplasmic reticulum	113	1359	1.13829e-10	54445	unc-93 homolog B1, TLR signaling regulator	Unc93b1
GO	endoplasmic reticulum	113	1359	1.13829e-10	56175	beta-site APP-cleaving enzyme 2	Bace2
GO	endoplasmic reticulum	113	1359	1.13829e-10	56298	atlastin GTPase 2	Atl2
GO	endoplasmic reticulum	113	1359	1.13829e-10	56529	SEC11 homolog A, signal peptidase complex subunit	Sec11a
GO	endoplasmic reticulum	113	1359	1.13829e-10	57377	mannosyl-oligosaccharide glucosidase	Mogs
GO	endoplasmic reticulum	113	1359	1.13829e-10	64051	synaptic vesicle glycoprotein 2 a	Sv2a
GO	endoplasmic reticulum	113	1359	1.13829e-10	64136	stromal cell-derived factor 2-like 1	Sdf2l1
GO	endoplasmic reticulum	113	1359	1.13829e-10	64138	cathepsin Z	Ctsz
GO	endoplasmic reticulum	113	1359	1.13829e-10	66059	keratinocyte associated protein 2	Krtcap2
GO	endoplasmic reticulum	113	1359	1.13829e-10	66111	transmembrane p24 trafficking protein 3	Tmed3
GO	endoplasmic reticulum	113	1359	1.13829e-10	66191	immediate early response 3 interacting protein 1	Ier3ip1
GO	endoplasmic reticulum	113	1359	1.13829e-10	66269	transmembrane p24 trafficking protein 6	Tmed6
GO	endoplasmic reticulum	113	1359	1.13829e-10	66286	SEC11 homolog C, signal peptidase complex subunit	Sec11c
GO	endoplasmic reticulum	113	1359	1.13829e-10	66340	presenilin enhancer gamma secretase subunit	Psenen
GO	endoplasmic reticulum	113	1359	1.13829e-10	66350	phospholipase A2, group XIIA	Pla2g12a
GO	endoplasmic reticulum	113	1359	1.13829e-10	66357	oligosaccharyltransferase complex subunit (non-catalytic)	Ostc
GO	endoplasmic reticulum	113	1359	1.13829e-10	66483	ribosomal protein L36A-like	Rpl36al
GO	endoplasmic reticulum	113	1359	1.13829e-10	67075	magnesium transporter 1	Magt1
GO	endoplasmic reticulum	113	1359	1.13829e-10	67216	membrane bound O-acyltransferase domain containing 2	Mboat2
GO	endoplasmic reticulum	113	1359	1.13829e-10	67456	ERGIC and golgi 2	Ergic2
GO	endoplasmic reticulum	113	1359	1.13829e-10	67490	UFM1 specific ligase 1	Ufl1
GO	endoplasmic reticulum	113	1359	1.13829e-10	67630	sterile alpha motif domain containing 8	Samd8
GO	endoplasmic reticulum	113	1359	1.13829e-10	67887	store-operated calcium entry-associated regulatory factor	Saraf
GO	endoplasmic reticulum	113	1359	1.13829e-10	67890	ubiquitin-fold modifier 1	Ufm1
GO	endoplasmic reticulum	113	1359	1.13829e-10	68262	1-acylglycerol-3-phosphate O-acyltransferase 4 (lysophosphatidic acid acyltransferase, delta)	Agpat4
GO	endoplasmic reticulum	113	1359	1.13829e-10	68316	apolipoprotein O	Apoo
GO	endoplasmic reticulum	113	1359	1.13829e-10	68552	small integral membrane protein 14	Smim14
GO	endoplasmic reticulum	113	1359	1.13829e-10	68581	transmembrane p24 trafficking protein 10	Tmed10
GO	endoplasmic reticulum	113	1359	1.13829e-10	68616	glycerophosphodiester phosphodiesterase domain containing 3	Gdpd3
GO	endoplasmic reticulum	113	1359	1.13829e-10	68832	lipid droplet associated hydrolase	Ldah
GO	endoplasmic reticulum	113	1359	1.13829e-10	69038	transmembrane protein 258	Tmem258
GO	endoplasmic reticulum	113	1359	1.13829e-10	69537	deoxyribonuclease 1-like 1	Dnase1l1
GO	endoplasmic reticulum	113	1359	1.13829e-10	69568	vitamin K epoxide reductase complex, subunit 1-like 1	Vkorc1l1
GO	endoplasmic reticulum	113	1359	1.13829e-10	70059	delta(4)-desaturase, sphingolipid 2	Degs2
GO	endoplasmic reticulum	113	1359	1.13829e-10	70361	lectin, mannose-binding, 1	Lman1
GO	endoplasmic reticulum	113	1359	1.13829e-10	71764	C2 calcium-dependent domain containing 2-like	C2cd2l
GO	endoplasmic reticulum	113	1359	1.13829e-10	71816	ring finger protein 180	Rnf180
GO	endoplasmic reticulum	113	1359	1.13829e-10	71881	adipocyte plasma membrane associated protein	Apmap
GO	endoplasmic reticulum	113	1359	1.13829e-10	72393	Fas apoptotic inhibitory molecule 2	Faim2
GO	endoplasmic reticulum	113	1359	1.13829e-10	74104	ATP-binding cassette, sub-family B (MDR/TAP), member 6	Abcb6
GO	endoplasmic reticulum	113	1359	1.13829e-10	74134	cytochrome P450, family 2, subfamily s, polypeptide 1	Cyp2s1
GO	endoplasmic reticulum	113	1359	1.13829e-10	74840	mesencephalic astrocyte-derived neurotrophic factor	Manf
GO	endoplasmic reticulum	113	1359	1.13829e-10	76192	abhydrolase domain containing 12	Abhd12
GO	endoplasmic reticulum	113	1359	1.13829e-10	76299	endoplasmic reticulum protein 44	Erp44
GO	endoplasmic reticulum	113	1359	1.13829e-10	77975	transmembrane protein 50B	Tmem50b
GO	endoplasmic reticulum	113	1359	1.13829e-10	78688	nucleolar protein 3 (apoptosis repressor with CARD domain)	Nol3
GO	endoplasmic reticulum	113	1359	1.13829e-10	79235	lecithin-retinol acyltransferase (phosphatidylcholine-retinol-O-acyltransferase)	Lrat
GO	endoplasmic reticulum	113	1359	1.13829e-10	81500	endoplasmic reticulum chaperone SIL1 homolog (S. cerevisiae)	Sil1
GO	endoplasmic reticulum	113	1359	1.13829e-10	94284	UDP glucuronosyltransferase 1 family, polypeptide A6A	Ugt1a6a
GO	organic acid metabolic process	71	702	1.48035e-10	104776	aldehyde dehydrogenase family 6, subfamily A1	Aldh6a1
GO	organic acid metabolic process	71	702	1.48035e-10	104923	acireductone dioxygenase 1	Adi1
GO	organic acid metabolic process	71	702	1.48035e-10	105349	aldo-keto reductase family 1, member C18	Akr1c18
GO	organic acid metabolic process	71	702	1.48035e-10	105355	solute carrier family 17 (sodium phosphate), member 3	Slc17a3
GO	organic acid metabolic process	71	702	1.48035e-10	105387	aldo-keto reductase family 1, member C14	Akr1c14
GO	organic acid metabolic process	71	702	1.48035e-10	108156	methylenetetrahydrofolate dehydrogenase (NADP+ dependent), methenyltetrahydrofolate cyclohydrolase, formyltetrahydrofolate synthase	Mthfd1
GO	organic acid metabolic process	71	702	1.48035e-10	109254	androgen dependent TFPI regulating protein	Adtrp
GO	organic acid metabolic process	71	702	1.48035e-10	110446	acetyl-Coenzyme A acetyltransferase 1	Acat1
GO	organic acid metabolic process	71	702	1.48035e-10	110842	electron transferring flavoprotein, alpha polypeptide	Etfa
GO	organic acid metabolic process	71	702	1.48035e-10	11430	acyl-Coenzyme A oxidase 1, palmitoyl	Acox1
GO	organic acid metabolic process	71	702	1.48035e-10	11522	alcohol dehydrogenase 1 (class I)	Adh1
GO	organic acid metabolic process	71	702	1.48035e-10	11671	aldehyde dehydrogenase family 3, subfamily A2	Aldh3a2
GO	organic acid metabolic process	71	702	1.48035e-10	11676	aldolase C, fructose-bisphosphate	Aldoc
GO	organic acid metabolic process	71	702	1.48035e-10	11770	fatty acid binding protein 4, adipocyte	Fabp4
GO	organic acid metabolic process	71	702	1.48035e-10	11847	arginase type II	Arg2
GO	organic acid metabolic process	71	702	1.48035e-10	11992	AU RNA binding protein/enoyl-coenzyme A hydratase	Auh
GO	organic acid metabolic process	71	702	1.48035e-10	12041	branched chain ketoacid dehydrogenase kinase	Bckdk
GO	organic acid metabolic process	71	702	1.48035e-10	12491	CD36 molecule	Cd36
GO	organic acid metabolic process	71	702	1.48035e-10	13082	cytochrome P450, family 26, subfamily a, polypeptide 1	Cyp26a1
GO	organic acid metabolic process	71	702	1.48035e-10	14600	growth hormone receptor	Ghr
GO	organic acid metabolic process	71	702	1.48035e-10	14651	hydroxyacyl glutathione hydrolase	Hagh
GO	organic acid metabolic process	71	702	1.48035e-10	14661	glutamate dehydrogenase 1	Glud1
GO	organic acid metabolic process	71	702	1.48035e-10	14718	glutamic-oxaloacetic transaminase 1, soluble	Got1
GO	organic acid metabolic process	71	702	1.48035e-10	15356	3-hydroxy-3-methylglutaryl-Coenzyme A lyase	Hmgcl
GO	organic acid metabolic process	71	702	1.48035e-10	16922	phytanoyl-CoA hydroxylase	Phyh
GO	organic acid metabolic process	71	702	1.48035e-10	17436	malic enzyme 1, NADP(+)-dependent, cytosolic	Me1
GO	organic acid metabolic process	71	702	1.48035e-10	17449	malate dehydrogenase 1, NAD (soluble)	Mdh1
GO	organic acid metabolic process	71	702	1.48035e-10	18618	phosphatidylethanolamine N-methyltransferase	Pemt
GO	organic acid metabolic process	71	702	1.48035e-10	18950	purine-nucleoside phosphorylase	Pnp
GO	organic acid metabolic process	71	702	1.48035e-10	19125	proline dehydrogenase	Prodh
GO	organic acid metabolic process	71	702	1.48035e-10	19378	aldehyde dehydrogenase family 1, subfamily A2	Aldh1a2
GO	organic acid metabolic process	71	702	1.48035e-10	19703	renin binding protein	Renbp
GO	organic acid metabolic process	71	702	1.48035e-10	20504	solute carrier family 17 (sodium phosphate), member 1	Slc17a1
GO	organic acid metabolic process	71	702	1.48035e-10	20524	solute carrier family 25 (mitochondrial carrier, peroxisomal membrane protein), member 17	Slc25a17
GO	organic acid metabolic process	71	702	1.48035e-10	20750	secreted phosphoprotein 1	Spp1
GO	organic acid metabolic process	71	702	1.48035e-10	20917	succinate-Coenzyme A ligase, GDP-forming, beta subunit	Suclg2
GO	organic acid metabolic process	71	702	1.48035e-10	209378	inter-alpha (globulin) inhibitor H5	Itih5
GO	organic acid metabolic process	71	702	1.48035e-10	22235	UDP-glucose dehydrogenase	Ugdh
GO	organic acid metabolic process	71	702	1.48035e-10	225579	solute carrier family 27 (fatty acid transporter), member 6	Slc27a6
GO	organic acid metabolic process	71	702	1.48035e-10	226143	cytochrome P450, family 2, subfamily c, polypeptide 23	Cyp2c23
GO	organic acid metabolic process	71	702	1.48035e-10	227095	3-hydroxyisobutyryl-Coenzyme A hydrolase	Hibch
GO	organic acid metabolic process	71	702	1.48035e-10	229905	kynurenine aminotransferase 3	Kyat3
GO	organic acid metabolic process	71	702	1.48035e-10	231327	phosphoribosyl pyrophosphate amidotransferase	Ppat
GO	organic acid metabolic process	71	702	1.48035e-10	235674	acetyl-Coenzyme A acyltransferase 1B	Acaa1b
GO	organic acid metabolic process	71	702	1.48035e-10	23945	monoglyceride lipase	Mgll
GO	organic acid metabolic process	71	702	1.48035e-10	23972	3'-phosphoadenosine 5'-phosphosulfate synthase 2	Papss2
GO	organic acid metabolic process	71	702	1.48035e-10	241452	dehydrogenase/reductase (SDR family) member 9	Dhrs9
GO	organic acid metabolic process	71	702	1.48035e-10	243537	urocanase domain containing 1	Uroc1
GO	organic acid metabolic process	71	702	1.48035e-10	26363	biotinidase	Btd
GO	organic acid metabolic process	71	702	1.48035e-10	264895	acyl-CoA synthetase family member 2	Acsf2
GO	organic acid metabolic process	71	702	1.48035e-10	319446	dipeptidase 2	Dpep2
GO	organic acid metabolic process	71	702	1.48035e-10	328035	fatty acid desaturase domain family, member 6	Fads6
GO	organic acid metabolic process	71	702	1.48035e-10	407243	transmembrane protein 189	Tmem189
GO	organic acid metabolic process	71	702	1.48035e-10	54326	elongation of very long chain fatty acids (FEN1/Elo2, SUR4/Elo3, yeast)-like 2	Elovl2
GO	organic acid metabolic process	71	702	1.48035e-10	56357	isovaleryl coenzyme A dehydrogenase	Ivd
GO	organic acid metabolic process	71	702	1.48035e-10	56794	2-hydroxyacyl-CoA lyase 1	Hacl1
GO	organic acid metabolic process	71	702	1.48035e-10	58875	3-hydroxyisobutyrate dehydrogenase	Hibadh
GO	organic acid metabolic process	71	702	1.48035e-10	66128	mitochondrial ribosomal protein S36	Mrps36
GO	organic acid metabolic process	71	702	1.48035e-10	66514	asparaginase like 1	Asrgl1
GO	organic acid metabolic process	71	702	1.48035e-10	66885	acyl-Coenzyme A dehydrogenase, short/branched chain	Acadsb
GO	organic acid metabolic process	71	702	1.48035e-10	67092	glycine amidinotransferase (L-arginine:glycine amidinotransferase)	Gatm
GO	organic acid metabolic process	71	702	1.48035e-10	67111	N-acylethanolamine acid amidase	Naaa
GO	organic acid metabolic process	71	702	1.48035e-10	68738	acyl-CoA synthetase short-chain family member 1	Acss1
GO	organic acid metabolic process	71	702	1.48035e-10	70266	kynurenine aminotransferase 1	Kyat1
GO	organic acid metabolic process	71	702	1.48035e-10	70456	mitochondrial pyruvate carrier 2	Mpc2
GO	organic acid metabolic process	71	702	1.48035e-10	71797	carbohydrate sulfotransferase 13	Chst13
GO	organic acid metabolic process	71	702	1.48035e-10	74114	carnitine O-octanoyltransferase	Crot
GO	organic acid metabolic process	71	702	1.48035e-10	74134	cytochrome P450, family 2, subfamily s, polypeptide 1	Cyp2s1
GO	organic acid metabolic process	71	702	1.48035e-10	74156	acyl-CoA thioesterase 12	Acot12
GO	organic acid metabolic process	71	702	1.48035e-10	76563	glutaminyl-tRNA synthase (glutamine-hydrolyzing)-like 1	Qrsl1
GO	organic acid metabolic process	71	702	1.48035e-10	94284	UDP glucuronosyltransferase 1 family, polypeptide A6A	Ugt1a6a
GO	extracellular region	93	1055	3.29139e-10	100037283	ribonuclease T2A	Rnaset2a
GO	extracellular region	93	1055	3.29139e-10	100340	sphingomyelin phosphodiesterase, acid-like 3B	Smpdl3b
GO	extracellular region	93	1055	3.29139e-10	110075	bone morphogenetic protein 3	Bmp3
GO	extracellular region	93	1055	3.29139e-10	114662	protease, serine 29	Prss29
GO	extracellular region	93	1055	3.29139e-10	11504	a disintegrin-like and metallopeptidase (reprolysin type) with thrombospondin type 1 motif, 1	Adamts1
GO	extracellular region	93	1055	3.29139e-10	12163	bone morphogenetic protein 8a	Bmp8a
GO	extracellular region	93	1055	3.29139e-10	12499	ectonucleoside triphosphate diphosphohydrolase 5	Entpd5
GO	extracellular region	93	1055	3.29139e-10	12527	CD9 antigen	Cd9
GO	extracellular region	93	1055	3.29139e-10	12977	colony stimulating factor 1 (macrophage)	Csf1
GO	extracellular region	93	1055	3.29139e-10	13030	cathepsin B	Ctsb
GO	extracellular region	93	1055	3.29139e-10	13052	coxsackie virus and adenovirus receptor	Cxadr
GO	extracellular region	93	1055	3.29139e-10	13214	defensin beta 1	Defb1
GO	extracellular region	93	1055	3.29139e-10	14114	fibulin 1	Fbln1
GO	extracellular region	93	1055	3.29139e-10	14130	Fc receptor, IgG, low affinity IIb	Fcgr2b
GO	extracellular region	93	1055	3.29139e-10	14133	ficolin A	Fcna
GO	extracellular region	93	1055	3.29139e-10	14161	fibrinogen alpha chain	Fga
GO	extracellular region	93	1055	3.29139e-10	14183	fibroblast growth factor receptor 2	Fgfr2
GO	extracellular region	93	1055	3.29139e-10	14190	fibrinogen-like protein 2	Fgl2
GO	extracellular region	93	1055	3.29139e-10	14256	FMS-like tyrosine kinase 3 ligand	Flt3l
GO	extracellular region	93	1055	3.29139e-10	14456	growth arrest specific 6	Gas6
GO	extracellular region	93	1055	3.29139e-10	14468	guanylate binding protein 2b	Gbp2b
GO	extracellular region	93	1055	3.29139e-10	14600	growth hormone receptor	Ghr
GO	extracellular region	93	1055	3.29139e-10	14778	glutathione peroxidase 3	Gpx3
GO	extracellular region	93	1055	3.29139e-10	14915	guanylate cyclase activator 2a (guanylin)	Guca2a
GO	extracellular region	93	1055	3.29139e-10	14916	guanylate cyclase activator 2b (retina)	Guca2b
GO	extracellular region	93	1055	3.29139e-10	15925	insulin degrading enzyme	Ide
GO	extracellular region	93	1055	3.29139e-10	16196	interleukin 7	Il7
GO	extracellular region	93	1055	3.29139e-10	16432	integral membrane protein 2B	Itm2b
GO	extracellular region	93	1055	3.29139e-10	16541	napsin A aspartic peptidase	Napsa
GO	extracellular region	93	1055	3.29139e-10	16592	fatty acid binding protein 5, epidermal	Fabp5
GO	extracellular region	93	1055	3.29139e-10	16644	kininogen 1	Kng1
GO	extracellular region	93	1055	3.29139e-10	16880	LIF receptor alpha	Lifr
GO	extracellular region	93	1055	3.29139e-10	18164	neuronal pentraxin 1	Nptx1
GO	extracellular region	93	1055	3.29139e-10	18208	netrin 1	Ntn1
GO	extracellular region	93	1055	3.29139e-10	18220	nucleobindin 1	Nucb1
GO	extracellular region	93	1055	3.29139e-10	18300	oncoprotein induced transcript 1	Oit1
GO	extracellular region	93	1055	3.29139e-10	18779	phospholipase A2 receptor 1	Pla2r1
GO	extracellular region	93	1055	3.29139e-10	18812	prolactin family 2, subfamily c, member 3	Prl2c3
GO	extracellular region	93	1055	3.29139e-10	18950	purine-nucleoside phosphorylase	Pnp
GO	extracellular region	93	1055	3.29139e-10	19073	serglycin	Srgn
GO	extracellular region	93	1055	3.29139e-10	19111	prolactin family 6, subfamily a, member 1	Prl6a1
GO	extracellular region	93	1055	3.29139e-10	19123	protein C	Proc
GO	extracellular region	93	1055	3.29139e-10	19141	legumain	Lgmn
GO	extracellular region	93	1055	3.29139e-10	19142	protease, serine 12 neurotrypsin (motopsin)	Prss12
GO	extracellular region	93	1055	3.29139e-10	19152	proteinase 3	Prtn3
GO	extracellular region	93	1055	3.29139e-10	194597	transmembrane protease, serine 11a	Tmprss11a
GO	extracellular region	93	1055	3.29139e-10	19662	retinol binding protein 4, plasma	Rbp4
GO	extracellular region	93	1055	3.29139e-10	20363	selenoprotein P	Selenop
GO	extracellular region	93	1055	3.29139e-10	20394	secretogranin V	Scg5
GO	extracellular region	93	1055	3.29139e-10	20442	ST3 beta-galactoside alpha-2,3-sialyltransferase 1	St3gal1
GO	extracellular region	93	1055	3.29139e-10	20750	secreted phosphoprotein 1	Spp1
GO	extracellular region	93	1055	3.29139e-10	209378	inter-alpha (globulin) inhibitor H5	Itih5
GO	extracellular region	93	1055	3.29139e-10	209588	secreted and transmembrane 1A	Sectm1a
GO	extracellular region	93	1055	3.29139e-10	210622	peptidase domain containing associated with muscle regeneration 1	Pamr1
GO	extracellular region	93	1055	3.29139e-10	214505	N-acetylglucosamine-1-phosphotransferase, gamma subunit	Gnptg
GO	extracellular region	93	1055	3.29139e-10	21808	transforming growth factor, beta 2	Tgfb2
GO	extracellular region	93	1055	3.29139e-10	21809	transforming growth factor, beta 3	Tgfb3
GO	extracellular region	93	1055	3.29139e-10	21936	tumor necrosis factor receptor superfamily, member 18	Tnfrsf18
GO	extracellular region	93	1055	3.29139e-10	22340	vascular endothelial growth factor B	Vegfb
GO	extracellular region	93	1055	3.29139e-10	224116	mucin 20	Muc20
GO	extracellular region	93	1055	3.29139e-10	22419	wingless-type MMTV integration site family, member 5B	Wnt5b
GO	extracellular region	93	1055	3.29139e-10	227627	odorant binding protein 2A	Obp2a
GO	extracellular region	93	1055	3.29139e-10	229688	chitinase-like 6	Chil6
GO	extracellular region	93	1055	3.29139e-10	234199	fibrinogen-like protein 1	Fgl1
GO	extracellular region	93	1055	3.29139e-10	23886	growth differentiation factor 15	Gdf15
GO	extracellular region	93	1055	3.29139e-10	240675	von Willebrand factor A domain containing 2	Vwa2
GO	extracellular region	93	1055	3.29139e-10	240913	a disintegrin-like and metallopeptidase (reprolysin type) with thrombospondin type 1 motif, 4	Adamts4
GO	extracellular region	93	1055	3.29139e-10	245050	golgi associated kinase 1A	Gask1a
GO	extracellular region	93	1055	3.29139e-10	26363	biotinidase	Btd
GO	extracellular region	93	1055	3.29139e-10	269423	abhydrolase domain containing 18	Abhd18
GO	extracellular region	93	1055	3.29139e-10	270757	BPI fold containing family C	Bpifc
GO	extracellular region	93	1055	3.29139e-10	282619	suprabasin	Sbsn
GO	extracellular region	93	1055	3.29139e-10	29820	tumor necrosis factor receptor superfamily, member 19	Tnfrsf19
GO	extracellular region	93	1055	3.29139e-10	30806	a disintegrin-like and metallopeptidase (reprolysin type) with thrombospondin type 1 motif, 8	Adamts8
GO	extracellular region	93	1055	3.29139e-10	385643	kininogen 2	Kng2
GO	extracellular region	93	1055	3.29139e-10	396184	fibronectin leucine rich transmembrane protein 1	Flrt1
GO	extracellular region	93	1055	3.29139e-10	433375	cellular repressor of E1A-stimulated genes 1	Creg1
GO	extracellular region	93	1055	3.29139e-10	53322	nucleobindin 2	Nucb2
GO	extracellular region	93	1055	3.29139e-10	56635	prolactin family 2, subfamily a, member 1	Prl2a1
GO	extracellular region	93	1055	3.29139e-10	58210	secreted and transmembrane 1B	Sectm1b
GO	extracellular region	93	1055	3.29139e-10	641361	phospholipase A2 inhibitor and LY6/PLAUR domain containing	Pinlyp
GO	extracellular region	93	1055	3.29139e-10	65972	interferon gamma inducible protein 30	Ifi30
GO	extracellular region	93	1055	3.29139e-10	66350	phospholipase A2, group XIIA	Pla2g12a
GO	extracellular region	93	1055	3.29139e-10	66548	ADAMTS-like 5	Adamtsl5
GO	extracellular region	93	1055	3.29139e-10	667034	purine-nucleoside phosphorylase 2	Pnp2
GO	extracellular region	93	1055	3.29139e-10	68039	neuromedin B	Nmb
GO	extracellular region	93	1055	3.29139e-10	68195	ribonuclease T2B	Rnaset2b
GO	extracellular region	93	1055	3.29139e-10	68316	apolipoprotein O	Apoo
GO	extracellular region	93	1055	3.29139e-10	71927	integrin alpha FG-GAP repeat containing 1	Itfg1
GO	extracellular region	93	1055	3.29139e-10	73712	dermokine	Dmkn
GO	extracellular region	93	1055	3.29139e-10	74840	mesencephalic astrocyte-derived neurotrophic factor	Manf
GO	extracellular region	93	1055	3.29139e-10	75512	glutathione peroxidase 6	Gpx6
GO	extracellular region	93	1055	3.29139e-10	76560	protease, serine 8 (prostasin)	Prss8
GO	hormone metabolic process	23	116	1.8532e-09	105349	aldo-keto reductase family 1, member C18	Akr1c18
GO	hormone metabolic process	23	116	1.8532e-09	105387	aldo-keto reductase family 1, member C14	Akr1c14
GO	hormone metabolic process	23	116	1.8532e-09	107585	deiodinase, iodothyronine type III	Dio3
GO	hormone metabolic process	23	116	1.8532e-09	11522	alcohol dehydrogenase 1 (class I)	Adh1
GO	hormone metabolic process	23	116	1.8532e-09	13030	cathepsin B	Ctsb
GO	hormone metabolic process	23	116	1.8532e-09	13074	cytochrome P450, family 17, subfamily a, polypeptide 1	Cyp17a1
GO	hormone metabolic process	23	116	1.8532e-09	13082	cytochrome P450, family 26, subfamily a, polypeptide 1	Cyp26a1
GO	hormone metabolic process	23	116	1.8532e-09	13116	cytochrome P450, family 46, subfamily a, polypeptide 1	Cyp46a1
GO	hormone metabolic process	23	116	1.8532e-09	14148	ferredoxin 1	Fdx1
GO	hormone metabolic process	23	116	1.8532e-09	14600	growth hormone receptor	Ghr
GO	hormone metabolic process	23	116	1.8532e-09	15925	insulin degrading enzyme	Ide
GO	hormone metabolic process	23	116	1.8532e-09	17252	retinol dehydrogenase 11	Rdh11
GO	hormone metabolic process	23	116	1.8532e-09	19378	aldehyde dehydrogenase family 1, subfamily A2	Aldh1a2
GO	hormone metabolic process	23	116	1.8532e-09	19662	retinol binding protein 4, plasma	Rbp4
GO	hormone metabolic process	23	116	1.8532e-09	20394	secretogranin V	Scg5
GO	hormone metabolic process	23	116	1.8532e-09	20750	secreted phosphoprotein 1	Spp1
GO	hormone metabolic process	23	116	1.8532e-09	218476	glucosaminyl (N-acetyl) transferase 4, core 2 (beta-1,6-N-acetylglucosaminyltransferase)	Gcnt4
GO	hormone metabolic process	23	116	1.8532e-09	241452	dehydrogenase/reductase (SDR family) member 9	Dhrs9
GO	hormone metabolic process	23	116	1.8532e-09	59045	START domain containing 3	Stard3
GO	hormone metabolic process	23	116	1.8532e-09	68947	carbohydrate sulfotransferase 8	Chst8
GO	hormone metabolic process	23	116	1.8532e-09	74134	cytochrome P450, family 2, subfamily s, polypeptide 1	Cyp2s1
GO	hormone metabolic process	23	116	1.8532e-09	77974	retinol dehydrogenase 12	Rdh12
GO	hormone metabolic process	23	116	1.8532e-09	79235	lecithin-retinol acyltransferase (phosphatidylcholine-retinol-O-acyltransferase)	Lrat
GO	catalytic activity	292	4835	2.07866e-09	100037283	ribonuclease T2A	Rnaset2a
GO	catalytic activity	292	4835	2.07866e-09	100198	hexose-6-phosphate dehydrogenase (glucose 1-dehydrogenase)	H6pd
GO	catalytic activity	292	4835	2.07866e-09	100340	sphingomyelin phosphodiesterase, acid-like 3B	Smpdl3b
GO	catalytic activity	292	4835	2.07866e-09	100504608	EEF1A lysine methyltransferase 3	Eef1akmt3
GO	catalytic activity	292	4835	2.07866e-09	100727	UDP glucuronosyltransferase 2 family, polypeptide B34	Ugt2b34
GO	catalytic activity	292	4835	2.07866e-09	102238433	predicted gene, 28042	Gm28042
GO	catalytic activity	292	4835	2.07866e-09	102614	ribonuclease P/MRP 25 subunit	Rpp25
GO	catalytic activity	292	4835	2.07866e-09	104776	aldehyde dehydrogenase family 6, subfamily A1	Aldh6a1
GO	catalytic activity	292	4835	2.07866e-09	104923	acireductone dioxygenase 1	Adi1
GO	catalytic activity	292	4835	2.07866e-09	105349	aldo-keto reductase family 1, member C18	Akr1c18
GO	catalytic activity	292	4835	2.07866e-09	105352	dual specificity phosphatase 22	Dusp22
GO	catalytic activity	292	4835	2.07866e-09	105387	aldo-keto reductase family 1, member C14	Akr1c14
GO	catalytic activity	292	4835	2.07866e-09	107435	histone aminotransferase 1	Hat1
GO	catalytic activity	292	4835	2.07866e-09	107569	5'-nucleotidase, cytosolic III	Nt5c3
GO	catalytic activity	292	4835	2.07866e-09	107585	deiodinase, iodothyronine type III	Dio3
GO	catalytic activity	292	4835	2.07866e-09	108156	methylenetetrahydrofolate dehydrogenase (NADP+ dependent), methenyltetrahydrofolate cyclohydrolase, formyltetrahydrofolate synthase	Mthfd1
GO	catalytic activity	292	4835	2.07866e-09	108687	ER degradation enhancer, mannosidase alpha-like 2	Edem2
GO	catalytic activity	292	4835	2.07866e-09	109254	androgen dependent TFPI regulating protein	Adtrp
GO	catalytic activity	292	4835	2.07866e-09	110265	methionine sulfoxide reductase A	Msra
GO	catalytic activity	292	4835	2.07866e-09	110446	acetyl-Coenzyme A acetyltransferase 1	Acat1
GO	catalytic activity	292	4835	2.07866e-09	110695	aldehyde dehydrogenase family 7, member A1	Aldh7a1
GO	catalytic activity	292	4835	2.07866e-09	110821	propionyl-Coenzyme A carboxylase, alpha polypeptide	Pcca
GO	catalytic activity	292	4835	2.07866e-09	110842	electron transferring flavoprotein, alpha polypeptide	Etfa
GO	catalytic activity	292	4835	2.07866e-09	112407	egl-9 family hypoxia-inducible factor 3	Egln3
GO	catalytic activity	292	4835	2.07866e-09	11430	acyl-Coenzyme A oxidase 1, palmitoyl	Acox1
GO	catalytic activity	292	4835	2.07866e-09	114615	elaC ribonuclease Z 1	Elac1
GO	catalytic activity	292	4835	2.07866e-09	114662	protease, serine 29	Prss29
GO	catalytic activity	292	4835	2.07866e-09	114714	RAD51 paralog C	Rad51c
GO	catalytic activity	292	4835	2.07866e-09	11504	a disintegrin-like and metallopeptidase (reprolysin type) with thrombospondin type 1 motif, 1	Adamts1
GO	catalytic activity	292	4835	2.07866e-09	11522	alcohol dehydrogenase 1 (class I)	Adh1
GO	catalytic activity	292	4835	2.07866e-09	11671	aldehyde dehydrogenase family 3, subfamily A2	Aldh3a2
GO	catalytic activity	292	4835	2.07866e-09	11676	aldolase C, fructose-bisphosphate	Aldoc
GO	catalytic activity	292	4835	2.07866e-09	11757	peroxiredoxin 3	Prdx3
GO	catalytic activity	292	4835	2.07866e-09	11847	arginase type II	Arg2
GO	catalytic activity	292	4835	2.07866e-09	11949	ATP synthase, H+ transporting, mitochondrial F1 complex, gamma polypeptide 1	Atp5c1
GO	catalytic activity	292	4835	2.07866e-09	11992	AU RNA binding protein/enoyl-coenzyme A hydratase	Auh
GO	catalytic activity	292	4835	2.07866e-09	11997	aldo-keto reductase family 1, member B7	Akr1b7
GO	catalytic activity	292	4835	2.07866e-09	12041	branched chain ketoacid dehydrogenase kinase	Bckdk
GO	catalytic activity	292	4835	2.07866e-09	12182	bone marrow stromal cell antigen 1	Bst1
GO	catalytic activity	292	4835	2.07866e-09	12351	carbonic anhydrase 4	Car4
GO	catalytic activity	292	4835	2.07866e-09	12496	ectonucleoside triphosphate diphosphohydrolase 2	Entpd2
GO	catalytic activity	292	4835	2.07866e-09	12499	ectonucleoside triphosphate diphosphohydrolase 5	Entpd5
GO	catalytic activity	292	4835	2.07866e-09	12531	cell division cycle 25B	Cdc25b
GO	catalytic activity	292	4835	2.07866e-09	12716	creatine kinase, mitochondrial 1, ubiquitous	Ckmt1
GO	catalytic activity	292	4835	2.07866e-09	12858	cytochrome c oxidase subunit 5A	Cox5a
GO	catalytic activity	292	4835	2.07866e-09	13030	cathepsin B	Ctsb
GO	catalytic activity	292	4835	2.07866e-09	13063	cytochrome c, somatic	Cycs
GO	catalytic activity	292	4835	2.07866e-09	13074	cytochrome P450, family 17, subfamily a, polypeptide 1	Cyp17a1
GO	catalytic activity	292	4835	2.07866e-09	13082	cytochrome P450, family 26, subfamily a, polypeptide 1	Cyp26a1
GO	catalytic activity	292	4835	2.07866e-09	13116	cytochrome P450, family 46, subfamily a, polypeptide 1	Cyp46a1
GO	catalytic activity	292	4835	2.07866e-09	13480	dolichol-phosphate (beta-D) mannosyltransferase 1	Dpm1
GO	catalytic activity	292	4835	2.07866e-09	13804	endonuclease G	Endog
GO	catalytic activity	292	4835	2.07866e-09	140743	rad and gem related GTP binding protein 2	Rem2
GO	catalytic activity	292	4835	2.07866e-09	140917	DNA cross-link repair 1B	Dclre1b
GO	catalytic activity	292	4835	2.07866e-09	14148	ferredoxin 1	Fdx1
GO	catalytic activity	292	4835	2.07866e-09	14183	fibroblast growth factor receptor 2	Fgfr2
GO	catalytic activity	292	4835	2.07866e-09	14187	aldo-keto reductase family 1, member B8	Akr1b8
GO	catalytic activity	292	4835	2.07866e-09	14190	fibrinogen-like protein 2	Fgl2
GO	catalytic activity	292	4835	2.07866e-09	14227	FK506 binding protein 2	Fkbp2
GO	catalytic activity	292	4835	2.07866e-09	14468	guanylate binding protein 2b	Gbp2b
GO	catalytic activity	292	4835	2.07866e-09	14651	hydroxyacyl glutathione hydrolase	Hagh
GO	catalytic activity	292	4835	2.07866e-09	14661	glutamate dehydrogenase 1	Glud1
GO	catalytic activity	292	4835	2.07866e-09	14701	guanine nucleotide binding protein (G protein), gamma 12	Gng12
GO	catalytic activity	292	4835	2.07866e-09	14718	glutamic-oxaloacetic transaminase 1, soluble	Got1
GO	catalytic activity	292	4835	2.07866e-09	14778	glutathione peroxidase 3	Gpx3
GO	catalytic activity	292	4835	2.07866e-09	14857	glutathione S-transferase, alpha 1 (Ya)	Gsta1
GO	catalytic activity	292	4835	2.07866e-09	14858	glutathione S-transferase, alpha 2 (Yc2)	Gsta2
GO	catalytic activity	292	4835	2.07866e-09	14869	glutathione S-transferase, pi 2	Gstp2
GO	catalytic activity	292	4835	2.07866e-09	14870	glutathione S-transferase, pi 1	Gstp1
GO	catalytic activity	292	4835	2.07866e-09	15212	hexosaminidase B	Hexb
GO	catalytic activity	292	4835	2.07866e-09	15356	3-hydroxy-3-methylglutaryl-Coenzyme A lyase	Hmgcl
GO	catalytic activity	292	4835	2.07866e-09	15452	hypoxanthine guanine phosphoribosyl transferase	Hprt
GO	catalytic activity	292	4835	2.07866e-09	15473	reactive intermediate imine deaminase A homolog	Rida
GO	catalytic activity	292	4835	2.07866e-09	15483	hydroxysteroid 11-beta dehydrogenase 1	Hsd11b1
GO	catalytic activity	292	4835	2.07866e-09	15925	insulin degrading enzyme	Ide
GO	catalytic activity	292	4835	2.07866e-09	16329	inositol polyphosphate-1-phosphatase	Inpp1
GO	catalytic activity	292	4835	2.07866e-09	16541	napsin A aspartic peptidase	Napsa
GO	catalytic activity	292	4835	2.07866e-09	16558	kinesin family member 16B	Kif16b
GO	catalytic activity	292	4835	2.07866e-09	16612	kallikrein 1	Klk1
GO	catalytic activity	292	4835	2.07866e-09	16616	kallikrein 1-related peptidase b21	Klk1b21
GO	catalytic activity	292	4835	2.07866e-09	16617	kallikrein 1-related peptidase b24	Klk1b24
GO	catalytic activity	292	4835	2.07866e-09	16619	kallikrein 1-related peptidase b27	Klk1b27
GO	catalytic activity	292	4835	2.07866e-09	16922	phytanoyl-CoA hydroxylase	Phyh
GO	catalytic activity	292	4835	2.07866e-09	170728	reticulon 4 interacting protein 1	Rtn4ip1
GO	catalytic activity	292	4835	2.07866e-09	17155	mannosidase 1, alpha	Man1a
GO	catalytic activity	292	4835	2.07866e-09	17252	retinol dehydrogenase 11	Rdh11
GO	catalytic activity	292	4835	2.07866e-09	17388	matrix metallopeptidase 15	Mmp15
GO	catalytic activity	292	4835	2.07866e-09	17436	malic enzyme 1, NADP(+)-dependent, cytosolic	Me1
GO	catalytic activity	292	4835	2.07866e-09	17449	malate dehydrogenase 1, NAD (soluble)	Mdh1
GO	catalytic activity	292	4835	2.07866e-09	18212	neurotrophic tyrosine kinase, receptor, type 2	Ntrk2
GO	catalytic activity	292	4835	2.07866e-09	18453	prolyl 4-hydroxylase, beta polypeptide	P4hb
GO	catalytic activity	292	4835	2.07866e-09	18607	3-phosphoinositide dependent protein kinase 1	Pdpk1
GO	catalytic activity	292	4835	2.07866e-09	18618	phosphatidylethanolamine N-methyltransferase	Pemt
GO	catalytic activity	292	4835	2.07866e-09	18669	ATP-binding cassette, sub-family B (MDR/TAP), member 1B	Abcb1b
GO	catalytic activity	292	4835	2.07866e-09	18671	ATP-binding cassette, sub-family B (MDR/TAP), member 1A	Abcb1a
GO	catalytic activity	292	4835	2.07866e-09	18950	purine-nucleoside phosphorylase	Pnp
GO	catalytic activity	292	4835	2.07866e-09	18973	polymerase (DNA directed), epsilon	Pole
GO	catalytic activity	292	4835	2.07866e-09	19057	protein phosphatase 3, catalytic subunit, gamma isoform	Ppp3cc
GO	catalytic activity	292	4835	2.07866e-09	19123	protein C	Proc
GO	catalytic activity	292	4835	2.07866e-09	19125	proline dehydrogenase	Prodh
GO	catalytic activity	292	4835	2.07866e-09	19141	legumain	Lgmn
GO	catalytic activity	292	4835	2.07866e-09	19142	protease, serine 12 neurotrypsin (motopsin)	Prss12
GO	catalytic activity	292	4835	2.07866e-09	19152	proteinase 3	Prtn3
GO	catalytic activity	292	4835	2.07866e-09	192169	UFM1-specific peptidase 2	Ufsp2
GO	catalytic activity	292	4835	2.07866e-09	192193	ER degradation enhancer, mannosidase alpha-like 1	Edem1
GO	catalytic activity	292	4835	2.07866e-09	19259	protein tyrosine phosphatase, non-receptor type 5	Ptpn5
GO	catalytic activity	292	4835	2.07866e-09	19264	protein tyrosine phosphatase, receptor type, C	Ptprc
GO	catalytic activity	292	4835	2.07866e-09	19329	RAB17, member RAS oncogene family	Rab17
GO	catalytic activity	292	4835	2.07866e-09	19340	RAB3D, member RAS oncogene family	Rab3d
GO	catalytic activity	292	4835	2.07866e-09	193740	heat shock protein 1A	Hspa1a
GO	catalytic activity	292	4835	2.07866e-09	19378	aldehyde dehydrogenase family 1, subfamily A2	Aldh1a2
GO	catalytic activity	292	4835	2.07866e-09	19416	RAS, dexamethasone-induced 1	Rasd1
GO	catalytic activity	292	4835	2.07866e-09	194597	transmembrane protease, serine 11a	Tmprss11a
GO	catalytic activity	292	4835	2.07866e-09	19703	renin binding protein	Renbp
GO	catalytic activity	292	4835	2.07866e-09	19886	Ros1 proto-oncogene	Ros1
GO	catalytic activity	292	4835	2.07866e-09	20135	ribonucleotide reductase M2	Rrm2
GO	catalytic activity	292	4835	2.07866e-09	20322	sorbitol dehydrogenase	Sord
GO	catalytic activity	292	4835	2.07866e-09	20393	serum/glucocorticoid regulated kinase 1	Sgk1
GO	catalytic activity	292	4835	2.07866e-09	20442	ST3 beta-galactoside alpha-2,3-sialyltransferase 1	St3gal1
GO	catalytic activity	292	4835	2.07866e-09	208727	histone deacetylase 4	Hdac4
GO	catalytic activity	292	4835	2.07866e-09	20917	succinate-Coenzyme A ligase, GDP-forming, beta subunit	Suclg2
GO	catalytic activity	292	4835	2.07866e-09	210622	peptidase domain containing associated with muscle regeneration 1	Pamr1
GO	catalytic activity	292	4835	2.07866e-09	210766	BRCA1/BRCA2-containing complex, subunit 3	Brcc3
GO	catalytic activity	292	4835	2.07866e-09	211429	phospholipase A2, group IVB (cytosolic)	Pla2g4b
GO	catalytic activity	292	4835	2.07866e-09	212539	predicted gene 266	Gm266
GO	catalytic activity	292	4835	2.07866e-09	214505	N-acetylglucosamine-1-phosphotransferase, gamma subunit	Gnptg
GO	catalytic activity	292	4835	2.07866e-09	214523	transmembrane protease, serine 4	Tmprss4
GO	catalytic activity	292	4835	2.07866e-09	214531	transmembrane protease, serine 13	Tmprss13
GO	catalytic activity	292	4835	2.07866e-09	215303	calcium/calmodulin-dependent protein kinase I gamma	Camk1g
GO	catalytic activity	292	4835	2.07866e-09	215446	ectonucleoside triphosphate diphosphohydrolase 3	Entpd3
GO	catalytic activity	292	4835	2.07866e-09	216134	pyridoxal (pyridoxine, vitamin B6) kinase	Pdxk
GO	catalytic activity	292	4835	2.07866e-09	217364	endo-beta-N-acetylglucosaminidase	Engase
GO	catalytic activity	292	4835	2.07866e-09	21743	indolethylamine N-methyltransferase	Inmt
GO	catalytic activity	292	4835	2.07866e-09	217664	mannoside acetylglucosaminyltransferase 2	Mgat2
GO	catalytic activity	292	4835	2.07866e-09	217837	inositol 1,3,4-triphosphate 5/6 kinase	Itpk1
GO	catalytic activity	292	4835	2.07866e-09	218138	GDP-mannose 4, 6-dehydratase	Gmds
GO	catalytic activity	292	4835	2.07866e-09	21817	transglutaminase 2, C polypeptide	Tgm2
GO	catalytic activity	292	4835	2.07866e-09	218461	phosphodiesterase 8B	Pde8b
GO	catalytic activity	292	4835	2.07866e-09	218476	glucosaminyl (N-acetyl) transferase 4, core 2 (beta-1,6-N-acetylglucosaminyltransferase)	Gcnt4
GO	catalytic activity	292	4835	2.07866e-09	219135	myotubularin related protein 6	Mtmr6
GO	catalytic activity	292	4835	2.07866e-09	22235	UDP-glucose dehydrogenase	Ugdh
GO	catalytic activity	292	4835	2.07866e-09	22238	UDP glucuronosyltransferase 2 family, polypeptide B5	Ugt2b5
GO	catalytic activity	292	4835	2.07866e-09	224454	zinc finger, DHHC domain containing 14	Zdhhc14
GO	catalytic activity	292	4835	2.07866e-09	225579	solute carrier family 27 (fatty acid transporter), member 6	Slc27a6
GO	catalytic activity	292	4835	2.07866e-09	225884	glutathione S-transferase pi 3	Gstp3
GO	catalytic activity	292	4835	2.07866e-09	22594	X-ray repair complementing defective repair in Chinese hamster cells 1	Xrcc1
GO	catalytic activity	292	4835	2.07866e-09	226143	cytochrome P450, family 2, subfamily c, polypeptide 23	Cyp2c23
GO	catalytic activity	292	4835	2.07866e-09	226791	lysophospholipase-like 1	Lyplal1
GO	catalytic activity	292	4835	2.07866e-09	226849	protein phosphatase 2, regulatory subunit B', alpha	Ppp2r5a
GO	catalytic activity	292	4835	2.07866e-09	227095	3-hydroxyisobutyryl-Coenzyme A hydrolase	Hibch
GO	catalytic activity	292	4835	2.07866e-09	229688	chitinase-like 6	Chil6
GO	catalytic activity	292	4835	2.07866e-09	229900	guanylate binding protein 7	Gbp7
GO	catalytic activity	292	4835	2.07866e-09	229905	kynurenine aminotransferase 3	Kyat3
GO	catalytic activity	292	4835	2.07866e-09	229949	adenylate kinase 5	Ak5
GO	catalytic activity	292	4835	2.07866e-09	231327	phosphoribosyl pyrophosphate amidotransferase	Ppat
GO	catalytic activity	292	4835	2.07866e-09	232223	thioredoxin reductase 3	Txnrd3
GO	catalytic activity	292	4835	2.07866e-09	232232	histone deacetylase 11	Hdac11
GO	catalytic activity	292	4835	2.07866e-09	232984	UDP-GlcNAc:betaGal beta-1,3-N-acetylglucosaminyltransferase 8	B3gnt8
GO	catalytic activity	292	4835	2.07866e-09	234669	carboxyesterase 2B	Ces2b
GO	catalytic activity	292	4835	2.07866e-09	235674	acetyl-Coenzyme A acyltransferase 1B	Acaa1b
GO	catalytic activity	292	4835	2.07866e-09	23945	monoglyceride lipase	Mgll
GO	catalytic activity	292	4835	2.07866e-09	23972	3'-phosphoadenosine 5'-phosphosulfate synthase 2	Papss2
GO	catalytic activity	292	4835	2.07866e-09	23984	phosphodiesterase 10A	Pde10a
GO	catalytic activity	292	4835	2.07866e-09	240913	a disintegrin-like and metallopeptidase (reprolysin type) with thrombospondin type 1 motif, 4	Adamts4
GO	catalytic activity	292	4835	2.07866e-09	241452	dehydrogenase/reductase (SDR family) member 9	Dhrs9
GO	catalytic activity	292	4835	2.07866e-09	243537	urocanase domain containing 1	Uroc1
GO	catalytic activity	292	4835	2.07866e-09	26363	biotinidase	Btd
GO	catalytic activity	292	4835	2.07866e-09	26450	retinoblastoma binding protein 9, serine hydrolase	Rbbp9
GO	catalytic activity	292	4835	2.07866e-09	264895	acyl-CoA synthetase family member 2	Acsf2
GO	catalytic activity	292	4835	2.07866e-09	270049	UDP-N-acetyl-alpha-D-galactosamine:polypeptide N-acetylgalactosaminyltransferase-like 6	Galntl6
GO	catalytic activity	292	4835	2.07866e-09	270166	caseinolytic mitochondrial matrix peptidase chaperone subunit	Clpx
GO	catalytic activity	292	4835	2.07866e-09	27361	methionine sulfoxide reductase B1	Msrb1
GO	catalytic activity	292	4835	2.07866e-09	27973	vitamin K epoxide reductase complex, subunit 1	Vkorc1
GO	catalytic activity	292	4835	2.07866e-09	30806	a disintegrin-like and metallopeptidase (reprolysin type) with thrombospondin type 1 motif, 8	Adamts8
GO	catalytic activity	292	4835	2.07866e-09	30933	torsin family 2, member A	Tor2a
GO	catalytic activity	292	4835	2.07866e-09	30949	leucine carboxyl methyltransferase 1	Lcmt1
GO	catalytic activity	292	4835	2.07866e-09	319446	dipeptidase 2	Dpep2
GO	catalytic activity	292	4835	2.07866e-09	319625	galactose mutarotase	Galm
GO	catalytic activity	292	4835	2.07866e-09	320635	cytochrome b5 reductase 2	Cyb5r2
GO	catalytic activity	292	4835	2.07866e-09	328035	fatty acid desaturase domain family, member 6	Fads6
GO	catalytic activity	292	4835	2.07866e-09	328779	heparan sulfate (glucosamine) 3-O-sulfotransferase 6	Hs3st6
GO	catalytic activity	292	4835	2.07866e-09	330890	piwi-like RNA-mediated gene silencing 4	Piwil4
GO	catalytic activity	292	4835	2.07866e-09	407243	transmembrane protein 189	Tmem189
GO	catalytic activity	292	4835	2.07866e-09	433323	sphingosine-1-phosphate phosphatase 2	Sgpp2
GO	catalytic activity	292	4835	2.07866e-09	50933	ubiquitin carboxyl-terminal esterase L3 (ubiquitin thiolesterase)	Uchl3
GO	catalytic activity	292	4835	2.07866e-09	52064	coenzyme Q5 methyltransferase	Coq5
GO	catalytic activity	292	4835	2.07866e-09	52700	thioredoxin domain containing 17	Txndc17
GO	catalytic activity	292	4835	2.07866e-09	53625	UDP-GlcNAc:betaGal beta-1,3-N-acetylglucosaminyltransferase 2	B3gnt2
GO	catalytic activity	292	4835	2.07866e-09	54326	elongation of very long chain fatty acids (FEN1/Elo2, SUR4/Elo3, yeast)-like 2	Elovl2
GO	catalytic activity	292	4835	2.07866e-09	54373	protease, serine 16 (thymus)	Prss16
GO	catalytic activity	292	4835	2.07866e-09	54397	palmitoyl-protein thioesterase 2	Ppt2
GO	catalytic activity	292	4835	2.07866e-09	54710	heparan sulfate (glucosamine) 3-O-sulfotransferase 3B1	Hs3st3b1
GO	catalytic activity	292	4835	2.07866e-09	56045	SAM domain and HD domain, 1	Samhd1
GO	catalytic activity	292	4835	2.07866e-09	56175	beta-site APP-cleaving enzyme 2	Bace2
GO	catalytic activity	292	4835	2.07866e-09	56298	atlastin GTPase 2	Atl2
GO	catalytic activity	292	4835	2.07866e-09	56357	isovaleryl coenzyme A dehydrogenase	Ivd
GO	catalytic activity	292	4835	2.07866e-09	56437	Ras-related associated with diabetes	Rrad
GO	catalytic activity	292	4835	2.07866e-09	56529	SEC11 homolog A, signal peptidase complex subunit	Sec11a
GO	catalytic activity	292	4835	2.07866e-09	56794	2-hydroxyacyl-CoA lyase 1	Hacl1
GO	catalytic activity	292	4835	2.07866e-09	57377	mannosyl-oligosaccharide glucosidase	Mogs
GO	catalytic activity	292	4835	2.07866e-09	57444	interferon-stimulated protein	Isg20
GO	catalytic activity	292	4835	2.07866e-09	58875	3-hydroxyisobutyrate dehydrogenase	Hibadh
GO	catalytic activity	292	4835	2.07866e-09	59007	N-glycanase 1	Ngly1
GO	catalytic activity	292	4835	2.07866e-09	59048	C1GALT1-specific chaperone 1	C1galt1c1
GO	catalytic activity	292	4835	2.07866e-09	64136	stromal cell-derived factor 2-like 1	Sdf2l1
GO	catalytic activity	292	4835	2.07866e-09	64138	cathepsin Z	Ctsz
GO	catalytic activity	292	4835	2.07866e-09	65254	dihydropyrimidinase-like 5	Dpysl5
GO	catalytic activity	292	4835	2.07866e-09	65972	interferon gamma inducible protein 30	Ifi30
GO	catalytic activity	292	4835	2.07866e-09	66071	ethylmalonic encephalopathy 1	Ethe1
GO	catalytic activity	292	4835	2.07866e-09	66120	FK506 binding protein 11	Fkbp11
GO	catalytic activity	292	4835	2.07866e-09	66179	2-oxoglutarate and iron-dependent oxygenase domain containing 3	Ogfod3
GO	catalytic activity	292	4835	2.07866e-09	66286	SEC11 homolog C, signal peptidase complex subunit	Sec11c
GO	catalytic activity	292	4835	2.07866e-09	66350	phospholipase A2, group XIIA	Pla2g12a
GO	catalytic activity	292	4835	2.07866e-09	66420	polymerase (RNA) II (DNA directed) polypeptide E	Polr2e
GO	catalytic activity	292	4835	2.07866e-09	66514	asparaginase like 1	Asrgl1
GO	catalytic activity	292	4835	2.07866e-09	66588	cytidine monophosphate (UMP-CMP) kinase 1	Cmpk1
GO	catalytic activity	292	4835	2.07866e-09	66589	ubiquitin-conjugating enzyme E2 variant 1	Ube2v1
GO	catalytic activity	292	4835	2.07866e-09	66609	crystallin, zeta (quinone reductase)-like 1	Cryzl1
GO	catalytic activity	292	4835	2.07866e-09	66694	ubiquinol-cytochrome c reductase, Rieske iron-sulfur polypeptide 1	Uqcrfs1
GO	catalytic activity	292	4835	2.07866e-09	667034	purine-nucleoside phosphorylase 2	Pnp2
GO	catalytic activity	292	4835	2.07866e-09	66885	acyl-Coenzyme A dehydrogenase, short/branched chain	Acadsb
GO	catalytic activity	292	4835	2.07866e-09	66925	succinate dehydrogenase complex, subunit D, integral membrane protein	Sdhd
GO	catalytic activity	292	4835	2.07866e-09	66988	leucine aminopeptidase 3	Lap3
GO	catalytic activity	292	4835	2.07866e-09	67054	phosphoribosylaminoimidazole carboxylase, phosphoribosylaminoribosylaminoimidazole, succinocarboxamide synthetase	Paics
GO	catalytic activity	292	4835	2.07866e-09	67092	glycine amidinotransferase (L-arginine:glycine amidinotransferase)	Gatm
GO	catalytic activity	292	4835	2.07866e-09	67111	N-acylethanolamine acid amidase	Naaa
GO	catalytic activity	292	4835	2.07866e-09	67216	membrane bound O-acyltransferase domain containing 2	Mboat2
GO	catalytic activity	292	4835	2.07866e-09	67490	UFM1 specific ligase 1	Ufl1
GO	catalytic activity	292	4835	2.07866e-09	67528	nudix (nucleoside diphosphate linked moiety X)-type motif 7	Nudt7
GO	catalytic activity	292	4835	2.07866e-09	67630	sterile alpha motif domain containing 8	Samd8
GO	catalytic activity	292	4835	2.07866e-09	67664	ring finger protein 125	Rnf125
GO	catalytic activity	292	4835	2.07866e-09	67893	transmembrane protein 86A	Tmem86a
GO	catalytic activity	292	4835	2.07866e-09	68098	ring finger and CHY zinc finger domain containing 1	Rchy1
GO	catalytic activity	292	4835	2.07866e-09	68149	OTU domain, ubiquitin aldehyde binding 2	Otub2
GO	catalytic activity	292	4835	2.07866e-09	68195	ribonuclease T2B	Rnaset2b
GO	catalytic activity	292	4835	2.07866e-09	68202	NADH:ubiquinone oxidoreductase subunit A5	Ndufa5
GO	catalytic activity	292	4835	2.07866e-09	68262	1-acylglycerol-3-phosphate O-acyltransferase 4 (lysophosphatidic acid acyltransferase, delta)	Agpat4
GO	catalytic activity	292	4835	2.07866e-09	68277	RIKEN cDNA 2310057M21 gene	2310057M21Rik
GO	catalytic activity	292	4835	2.07866e-09	68371	phenazine biosynthesis-like protein domain containing 1	Pbld1
GO	catalytic activity	292	4835	2.07866e-09	68616	glycerophosphodiester phosphodiesterase domain containing 3	Gdpd3
GO	catalytic activity	292	4835	2.07866e-09	68738	acyl-CoA synthetase short-chain family member 1	Acss1
GO	catalytic activity	292	4835	2.07866e-09	68832	lipid droplet associated hydrolase	Ldah
GO	catalytic activity	292	4835	2.07866e-09	68939	RAS-like, family 11, member B	Rasl11b
GO	catalytic activity	292	4835	2.07866e-09	68947	carbohydrate sulfotransferase 8	Chst8
GO	catalytic activity	292	4835	2.07866e-09	69008	calcium binding protein 39-like	Cab39l
GO	catalytic activity	292	4835	2.07866e-09	69537	deoxyribonuclease 1-like 1	Dnase1l1
GO	catalytic activity	292	4835	2.07866e-09	69568	vitamin K epoxide reductase complex, subunit 1-like 1	Vkorc1l1
GO	catalytic activity	292	4835	2.07866e-09	69718	inositol polyphosphate multikinase	Ipmk
GO	catalytic activity	292	4835	2.07866e-09	70059	delta(4)-desaturase, sphingolipid 2	Degs2
GO	catalytic activity	292	4835	2.07866e-09	70152	methyltransferase like 7A1	Mettl7a1
GO	catalytic activity	292	4835	2.07866e-09	70266	kynurenine aminotransferase 1	Kyat1
GO	catalytic activity	292	4835	2.07866e-09	70478	mitochondrial intermediate peptidase	Mipep
GO	catalytic activity	292	4835	2.07866e-09	71664	methyltransferase like 7B	Mettl7b
GO	catalytic activity	292	4835	2.07866e-09	71780	myo-inositol 1-phosphate synthase A1	Isyna1
GO	catalytic activity	292	4835	2.07866e-09	71797	carbohydrate sulfotransferase 13	Chst13
GO	catalytic activity	292	4835	2.07866e-09	71816	ring finger protein 180	Rnf180
GO	catalytic activity	292	4835	2.07866e-09	71881	adipocyte plasma membrane associated protein	Apmap
GO	catalytic activity	292	4835	2.07866e-09	71985	acyl-Coenzyme A dehydrogenase family, member 10	Acad10
GO	catalytic activity	292	4835	2.07866e-09	72057	PHD finger protein 10	Phf10
GO	catalytic activity	292	4835	2.07866e-09	72349	dual specificity phosphatase 3 (vaccinia virus phosphatase VH1-related)	Dusp3
GO	catalytic activity	292	4835	2.07866e-09	72391	cyclin-dependent kinase inhibitor 3	Cdkn3
GO	catalytic activity	292	4835	2.07866e-09	72399	BRCA1 associated protein	Brap
GO	catalytic activity	292	4835	2.07866e-09	73419	acidic residue methyltransferase 1	Armt1
GO	catalytic activity	292	4835	2.07866e-09	73582	calmodulin-lysine N-methyltransferase	Camkmt
GO	catalytic activity	292	4835	2.07866e-09	74032	short chain dehydrogenase/reductase family 42E, member 1	Sdr42e1
GO	catalytic activity	292	4835	2.07866e-09	74104	ATP-binding cassette, sub-family B (MDR/TAP), member 6	Abcb6
GO	catalytic activity	292	4835	2.07866e-09	74114	carnitine O-octanoyltransferase	Crot
GO	catalytic activity	292	4835	2.07866e-09	74134	cytochrome P450, family 2, subfamily s, polypeptide 1	Cyp2s1
GO	catalytic activity	292	4835	2.07866e-09	74156	acyl-CoA thioesterase 12	Acot12
GO	catalytic activity	292	4835	2.07866e-09	74528	mitochondrial genome maintenance exonuclease 1	Mgme1
GO	catalytic activity	292	4835	2.07866e-09	74568	mixed lineage kinase domain-like	Mlkl
GO	catalytic activity	292	4835	2.07866e-09	75007	MINDY lysine 48 deubiquitinase 1	Mindy1
GO	catalytic activity	292	4835	2.07866e-09	75178	meiosis specific with OB domains	Meiob
GO	catalytic activity	292	4835	2.07866e-09	75512	glutathione peroxidase 6	Gpx6
GO	catalytic activity	292	4835	2.07866e-09	75812	taspase, threonine aspartase 1	Tasp1
GO	catalytic activity	292	4835	2.07866e-09	75985	RAB30, member RAS oncogene family	Rab30
GO	catalytic activity	292	4835	2.07866e-09	76192	abhydrolase domain containing 12	Abhd12
GO	catalytic activity	292	4835	2.07866e-09	76299	endoplasmic reticulum protein 44	Erp44
GO	catalytic activity	292	4835	2.07866e-09	76408	ATP-binding cassette, sub-family C (CFTR/MRP), member 3	Abcc3
GO	catalytic activity	292	4835	2.07866e-09	76560	protease, serine 8 (prostasin)	Prss8
GO	catalytic activity	292	4835	2.07866e-09	76563	glutaminyl-tRNA synthase (glutamine-hydrolyzing)-like 1	Qrsl1
GO	catalytic activity	292	4835	2.07866e-09	76630	STAM binding protein like 1	Stambpl1
GO	catalytic activity	292	4835	2.07866e-09	76650	sulfiredoxin 1 homolog (S. cerevisiae)	Srxn1
GO	catalytic activity	292	4835	2.07866e-09	76974	urate (5-hydroxyiso-) hydrolase	Urah
GO	catalytic activity	292	4835	2.07866e-09	77974	retinol dehydrogenase 12	Rdh12
GO	catalytic activity	292	4835	2.07866e-09	78394	DExD box helicase 52	Ddx52
GO	catalytic activity	292	4835	2.07866e-09	78825	desumoylating isopeptidase 2	Desi2
GO	catalytic activity	292	4835	2.07866e-09	79235	lecithin-retinol acyltransferase (phosphatidylcholine-retinol-O-acyltransferase)	Lrat
GO	catalytic activity	292	4835	2.07866e-09	83553	transketolase-like 1	Tktl1
GO	catalytic activity	292	4835	2.07866e-09	94284	UDP glucuronosyltransferase 1 family, polypeptide A6A	Ugt1a6a
GO	catalytic activity	292	4835	2.07866e-09	96957	transmembrane protein 62	Tmem62
GO	catalytic activity	292	4835	2.07866e-09	97820	RIKEN cDNA 4833439L19 gene	4833439L19Rik
GO	cellular anatomical entity	653	13280	2.22199e-09	100037283	ribonuclease T2A	Rnaset2a
GO	cellular anatomical entity	653	13280	2.22199e-09	100038347	family with sequence similarity 174, member B	Fam174b
GO	cellular anatomical entity	653	13280	2.22199e-09	100198	hexose-6-phosphate dehydrogenase (glucose 1-dehydrogenase)	H6pd
GO	cellular anatomical entity	653	13280	2.22199e-09	100340	sphingomyelin phosphodiesterase, acid-like 3B	Smpdl3b
GO	cellular anatomical entity	653	13280	2.22199e-09	100503386	trophoblast glycoprotein-like	Tpbgl
GO	cellular anatomical entity	653	13280	2.22199e-09	100504608	EEF1A lysine methyltransferase 3	Eef1akmt3
GO	cellular anatomical entity	653	13280	2.22199e-09	100727	UDP glucuronosyltransferase 2 family, polypeptide B34	Ugt2b34
GO	cellular anatomical entity	653	13280	2.22199e-09	101831	Fanconi anemia core complex associated protein 24	Faap24
GO	cellular anatomical entity	653	13280	2.22199e-09	102238433	predicted gene, 28042	Gm28042
GO	cellular anatomical entity	653	13280	2.22199e-09	102614	ribonuclease P/MRP 25 subunit	Rpp25
GO	cellular anatomical entity	653	13280	2.22199e-09	102680	solute carrier family 6 (neurotransmitter transporter), member 20A	Slc6a20a
GO	cellular anatomical entity	653	13280	2.22199e-09	104776	aldehyde dehydrogenase family 6, subfamily A1	Aldh6a1
GO	cellular anatomical entity	653	13280	2.22199e-09	104923	acireductone dioxygenase 1	Adi1
GO	cellular anatomical entity	653	13280	2.22199e-09	105349	aldo-keto reductase family 1, member C18	Akr1c18
GO	cellular anatomical entity	653	13280	2.22199e-09	105352	dual specificity phosphatase 22	Dusp22
GO	cellular anatomical entity	653	13280	2.22199e-09	105355	solute carrier family 17 (sodium phosphate), member 3	Slc17a3
GO	cellular anatomical entity	653	13280	2.22199e-09	105387	aldo-keto reductase family 1, member C14	Akr1c14
GO	cellular anatomical entity	653	13280	2.22199e-09	105833	coiled-coil domain containing 65	Ccdc65
GO	cellular anatomical entity	653	13280	2.22199e-09	106759	toll-like receptor adaptor molecule 1	Ticam1
GO	cellular anatomical entity	653	13280	2.22199e-09	106840	unc-119 lipid binding chaperone B	Unc119b
GO	cellular anatomical entity	653	13280	2.22199e-09	107022	GRAM domain containing 3	Gramd3
GO	cellular anatomical entity	653	13280	2.22199e-09	107047	proteasome (prosome, macropain) assembly chaperone 2	Psmg2
GO	cellular anatomical entity	653	13280	2.22199e-09	107373	family with sequence similarity 111, member A	Fam111a
GO	cellular anatomical entity	653	13280	2.22199e-09	107375	solute carrier family 25, member 45	Slc25a45
GO	cellular anatomical entity	653	13280	2.22199e-09	107435	histone aminotransferase 1	Hat1
GO	cellular anatomical entity	653	13280	2.22199e-09	107448	unc-5 netrin receptor A	Unc5a
GO	cellular anatomical entity	653	13280	2.22199e-09	107513	signal sequence receptor, alpha	Ssr1
GO	cellular anatomical entity	653	13280	2.22199e-09	107569	5'-nucleotidase, cytosolic III	Nt5c3
GO	cellular anatomical entity	653	13280	2.22199e-09	107585	deiodinase, iodothyronine type III	Dio3
GO	cellular anatomical entity	653	13280	2.22199e-09	107771	brain expressed myelocytomatosis oncogene	Bmyc
GO	cellular anatomical entity	653	13280	2.22199e-09	107976	BRISC and BRCA1 A complex member 2	Babam2
GO	cellular anatomical entity	653	13280	2.22199e-09	108156	methylenetetrahydrofolate dehydrogenase (NADP+ dependent), methenyltetrahydrofolate cyclohydrolase, formyltetrahydrofolate synthase	Mthfd1
GO	cellular anatomical entity	653	13280	2.22199e-09	108687	ER degradation enhancer, mannosidase alpha-like 2	Edem2
GO	cellular anatomical entity	653	13280	2.22199e-09	108907	nucleolar and spindle associated protein 1	Nusap1
GO	cellular anatomical entity	653	13280	2.22199e-09	109254	androgen dependent TFPI regulating protein	Adtrp
GO	cellular anatomical entity	653	13280	2.22199e-09	109700	integrin alpha 1	Itga1
GO	cellular anatomical entity	653	13280	2.22199e-09	110075	bone morphogenetic protein 3	Bmp3
GO	cellular anatomical entity	653	13280	2.22199e-09	110172	solute carrier family 35, member B1	Slc35b1
GO	cellular anatomical entity	653	13280	2.22199e-09	110265	methionine sulfoxide reductase A	Msra
GO	cellular anatomical entity	653	13280	2.22199e-09	110446	acetyl-Coenzyme A acetyltransferase 1	Acat1
GO	cellular anatomical entity	653	13280	2.22199e-09	110695	aldehyde dehydrogenase family 7, member A1	Aldh7a1
GO	cellular anatomical entity	653	13280	2.22199e-09	110821	propionyl-Coenzyme A carboxylase, alpha polypeptide	Pcca
GO	cellular anatomical entity	653	13280	2.22199e-09	110842	electron transferring flavoprotein, alpha polypeptide	Etfa
GO	cellular anatomical entity	653	13280	2.22199e-09	110880	sodium channel, voltage-gated, type IV, alpha	Scn4a
GO	cellular anatomical entity	653	13280	2.22199e-09	112407	egl-9 family hypoxia-inducible factor 3	Egln3
GO	cellular anatomical entity	653	13280	2.22199e-09	114128	lysosomal-associated protein transmembrane 4B	Laptm4b
GO	cellular anatomical entity	653	13280	2.22199e-09	11416	solute carrier family 33 (acetyl-CoA transporter), member 1	Slc33a1
GO	cellular anatomical entity	653	13280	2.22199e-09	11419	acid-sensing (proton-gated) ion channel 1	Asic1
GO	cellular anatomical entity	653	13280	2.22199e-09	11430	acyl-Coenzyme A oxidase 1, palmitoyl	Acox1
GO	cellular anatomical entity	653	13280	2.22199e-09	114615	elaC ribonuclease Z 1	Elac1
GO	cellular anatomical entity	653	13280	2.22199e-09	114662	protease, serine 29	Prss29
GO	cellular anatomical entity	653	13280	2.22199e-09	114714	RAD51 paralog C	Rad51c
GO	cellular anatomical entity	653	13280	2.22199e-09	11504	a disintegrin-like and metallopeptidase (reprolysin type) with thrombospondin type 1 motif, 1	Adamts1
GO	cellular anatomical entity	653	13280	2.22199e-09	11522	alcohol dehydrogenase 1 (class I)	Adh1
GO	cellular anatomical entity	653	13280	2.22199e-09	11671	aldehyde dehydrogenase family 3, subfamily A2	Aldh3a2
GO	cellular anatomical entity	653	13280	2.22199e-09	11676	aldolase C, fructose-bisphosphate	Aldoc
GO	cellular anatomical entity	653	13280	2.22199e-09	11757	peroxiredoxin 3	Prdx3
GO	cellular anatomical entity	653	13280	2.22199e-09	11770	fatty acid binding protein 4, adipocyte	Fabp4
GO	cellular anatomical entity	653	13280	2.22199e-09	11827	aquaporin 2	Aqp2
GO	cellular anatomical entity	653	13280	2.22199e-09	11830	aquaporin 5	Aqp5
GO	cellular anatomical entity	653	13280	2.22199e-09	11833	aquaporin 8	Aqp8
GO	cellular anatomical entity	653	13280	2.22199e-09	11847	arginase type II	Arg2
GO	cellular anatomical entity	653	13280	2.22199e-09	11908	activating transcription factor 1	Atf1
GO	cellular anatomical entity	653	13280	2.22199e-09	11910	activating transcription factor 3	Atf3
GO	cellular anatomical entity	653	13280	2.22199e-09	11949	ATP synthase, H+ transporting, mitochondrial F1 complex, gamma polypeptide 1	Atp5c1
GO	cellular anatomical entity	653	13280	2.22199e-09	11964	ATPase, H+ transporting, lysosomal V1 subunit A	Atp6v1a
GO	cellular anatomical entity	653	13280	2.22199e-09	11979	ATPase, Cu++ transporting, beta polypeptide	Atp7b
GO	cellular anatomical entity	653	13280	2.22199e-09	11992	AU RNA binding protein/enoyl-coenzyme A hydratase	Auh
GO	cellular anatomical entity	653	13280	2.22199e-09	11997	aldo-keto reductase family 1, member B7	Akr1b7
GO	cellular anatomical entity	653	13280	2.22199e-09	12041	branched chain ketoacid dehydrogenase kinase	Bckdk
GO	cellular anatomical entity	653	13280	2.22199e-09	12068	Bet1 golgi vesicular membrane trafficking protein	Bet1
GO	cellular anatomical entity	653	13280	2.22199e-09	121022	mitochondrial ribosomal protein S6	Mrps6
GO	cellular anatomical entity	653	13280	2.22199e-09	12124	BCL2-interacting killer	Bik
GO	cellular anatomical entity	653	13280	2.22199e-09	12163	bone morphogenetic protein 8a	Bmp8a
GO	cellular anatomical entity	653	13280	2.22199e-09	12182	bone marrow stromal cell antigen 1	Bst1
GO	cellular anatomical entity	653	13280	2.22199e-09	12226	BTG anti-proliferation factor 1	Btg1
GO	cellular anatomical entity	653	13280	2.22199e-09	12292	calcium channel, voltage-dependent, L type, alpha 1S subunit	Cacna1s
GO	cellular anatomical entity	653	13280	2.22199e-09	12351	carbonic anhydrase 4	Car4
GO	cellular anatomical entity	653	13280	2.22199e-09	12484	CD24a antigen	Cd24a
GO	cellular anatomical entity	653	13280	2.22199e-09	12491	CD36 molecule	Cd36
GO	cellular anatomical entity	653	13280	2.22199e-09	12492	scavenger receptor class B, member 2	Scarb2
GO	cellular anatomical entity	653	13280	2.22199e-09	12496	ectonucleoside triphosphate diphosphohydrolase 2	Entpd2
GO	cellular anatomical entity	653	13280	2.22199e-09	12499	ectonucleoside triphosphate diphosphohydrolase 5	Entpd5
GO	cellular anatomical entity	653	13280	2.22199e-09	12514	CD68 antigen	Cd68
GO	cellular anatomical entity	653	13280	2.22199e-09	12527	CD9 antigen	Cd9
GO	cellular anatomical entity	653	13280	2.22199e-09	12531	cell division cycle 25B	Cdc25b
GO	cellular anatomical entity	653	13280	2.22199e-09	12556	cadherin 16	Cdh16
GO	cellular anatomical entity	653	13280	2.22199e-09	12580	cyclin dependent kinase inhibitor 2C	Cdkn2c
GO	cellular anatomical entity	653	13280	2.22199e-09	12585	cerebellar degeneration-related 2	Cdr2
GO	cellular anatomical entity	653	13280	2.22199e-09	12611	CCAAT/enhancer binding protein (C/EBP), gamma	Cebpg
GO	cellular anatomical entity	653	13280	2.22199e-09	12615	centromere protein A	Cenpa
GO	cellular anatomical entity	653	13280	2.22199e-09	12683	cell death-inducing DNA fragmentation factor, alpha subunit-like effector A	Cidea
GO	cellular anatomical entity	653	13280	2.22199e-09	12716	creatine kinase, mitochondrial 1, ubiquitous	Ckmt1
GO	cellular anatomical entity	653	13280	2.22199e-09	12856	cytochrome c oxidase assembly protein 17, copper chaperone	Cox17
GO	cellular anatomical entity	653	13280	2.22199e-09	12858	cytochrome c oxidase subunit 5A	Cox5a
GO	cellular anatomical entity	653	13280	2.22199e-09	12879	cystin 1	Cys1
GO	cellular anatomical entity	653	13280	2.22199e-09	12916	cAMP responsive element modulator	Crem
GO	cellular anatomical entity	653	13280	2.22199e-09	12977	colony stimulating factor 1 (macrophage)	Csf1
GO	cellular anatomical entity	653	13280	2.22199e-09	13030	cathepsin B	Ctsb
GO	cellular anatomical entity	653	13280	2.22199e-09	13052	coxsackie virus and adenovirus receptor	Cxadr
GO	cellular anatomical entity	653	13280	2.22199e-09	13063	cytochrome c, somatic	Cycs
GO	cellular anatomical entity	653	13280	2.22199e-09	13074	cytochrome P450, family 17, subfamily a, polypeptide 1	Cyp17a1
GO	cellular anatomical entity	653	13280	2.22199e-09	13082	cytochrome P450, family 26, subfamily a, polypeptide 1	Cyp26a1
GO	cellular anatomical entity	653	13280	2.22199e-09	13116	cytochrome P450, family 46, subfamily a, polypeptide 1	Cyp46a1
GO	cellular anatomical entity	653	13280	2.22199e-09	13214	defensin beta 1	Defb1
GO	cellular anatomical entity	653	13280	2.22199e-09	13480	dolichol-phosphate (beta-D) mannosyltransferase 1	Dpm1
GO	cellular anatomical entity	653	13280	2.22199e-09	13488	dopamine receptor D1	Drd1
GO	cellular anatomical entity	653	13280	2.22199e-09	13559	E2F transcription factor 5	E2f5
GO	cellular anatomical entity	653	13280	2.22199e-09	13716	elongation factor RNA polymerase II	Ell
GO	cellular anatomical entity	653	13280	2.22199e-09	13723	embigin	Emb
GO	cellular anatomical entity	653	13280	2.22199e-09	13804	endonuclease G	Endog
GO	cellular anatomical entity	653	13280	2.22199e-09	140494	ATPase, H+ transporting, lysosomal V0 subunit A4	Atp6v0a4
GO	cellular anatomical entity	653	13280	2.22199e-09	14057	sideroflexin 1	Sfxn1
GO	cellular anatomical entity	653	13280	2.22199e-09	140743	rad and gem related GTP binding protein 2	Rem2
GO	cellular anatomical entity	653	13280	2.22199e-09	140917	DNA cross-link repair 1B	Dclre1b
GO	cellular anatomical entity	653	13280	2.22199e-09	14114	fibulin 1	Fbln1
GO	cellular anatomical entity	653	13280	2.22199e-09	14130	Fc receptor, IgG, low affinity IIb	Fcgr2b
GO	cellular anatomical entity	653	13280	2.22199e-09	14133	ficolin A	Fcna
GO	cellular anatomical entity	653	13280	2.22199e-09	14148	ferredoxin 1	Fdx1
GO	cellular anatomical entity	653	13280	2.22199e-09	14161	fibrinogen alpha chain	Fga
GO	cellular anatomical entity	653	13280	2.22199e-09	14183	fibroblast growth factor receptor 2	Fgfr2
GO	cellular anatomical entity	653	13280	2.22199e-09	14187	aldo-keto reductase family 1, member B8	Akr1b8
GO	cellular anatomical entity	653	13280	2.22199e-09	14190	fibrinogen-like protein 2	Fgl2
GO	cellular anatomical entity	653	13280	2.22199e-09	14227	FK506 binding protein 2	Fkbp2
GO	cellular anatomical entity	653	13280	2.22199e-09	14251	flotillin 1	Flot1
GO	cellular anatomical entity	653	13280	2.22199e-09	14256	FMS-like tyrosine kinase 3 ligand	Flt3l
GO	cellular anatomical entity	653	13280	2.22199e-09	14456	growth arrest specific 6	Gas6
GO	cellular anatomical entity	653	13280	2.22199e-09	14468	guanylate binding protein 2b	Gbp2b
GO	cellular anatomical entity	653	13280	2.22199e-09	14539	opsin 1 (cone pigments), medium-wave-sensitive (color blindness, deutan)	Opn1mw
GO	cellular anatomical entity	653	13280	2.22199e-09	14600	growth hormone receptor	Ghr
GO	cellular anatomical entity	653	13280	2.22199e-09	14618	gap junction protein, beta 1	Gjb1
GO	cellular anatomical entity	653	13280	2.22199e-09	14619	gap junction protein, beta 2	Gjb2
GO	cellular anatomical entity	653	13280	2.22199e-09	14651	hydroxyacyl glutathione hydrolase	Hagh
GO	cellular anatomical entity	653	13280	2.22199e-09	14661	glutamate dehydrogenase 1	Glud1
GO	cellular anatomical entity	653	13280	2.22199e-09	14701	guanine nucleotide binding protein (G protein), gamma 12	Gng12
GO	cellular anatomical entity	653	13280	2.22199e-09	14718	glutamic-oxaloacetic transaminase 1, soluble	Got1
GO	cellular anatomical entity	653	13280	2.22199e-09	14778	glutathione peroxidase 3	Gpx3
GO	cellular anatomical entity	653	13280	2.22199e-09	14857	glutathione S-transferase, alpha 1 (Ya)	Gsta1
GO	cellular anatomical entity	653	13280	2.22199e-09	14858	glutathione S-transferase, alpha 2 (Yc2)	Gsta2
GO	cellular anatomical entity	653	13280	2.22199e-09	14869	glutathione S-transferase, pi 2	Gstp2
GO	cellular anatomical entity	653	13280	2.22199e-09	14870	glutathione S-transferase, pi 1	Gstp1
GO	cellular anatomical entity	653	13280	2.22199e-09	14894	cilia and flagella associated protein 20	Cfap20
GO	cellular anatomical entity	653	13280	2.22199e-09	14915	guanylate cyclase activator 2a (guanylin)	Guca2a
GO	cellular anatomical entity	653	13280	2.22199e-09	14916	guanylate cyclase activator 2b (retina)	Guca2b
GO	cellular anatomical entity	653	13280	2.22199e-09	15064	major histocompatibility complex, class I-related	Mr1
GO	cellular anatomical entity	653	13280	2.22199e-09	15209	homeobox gene expressed in ES cells	Hesx1
GO	cellular anatomical entity	653	13280	2.22199e-09	15212	hexosaminidase B	Hexb
GO	cellular anatomical entity	653	13280	2.22199e-09	15227	forkhead box F1	Foxf1
GO	cellular anatomical entity	653	13280	2.22199e-09	15356	3-hydroxy-3-methylglutaryl-Coenzyme A lyase	Hmgcl
GO	cellular anatomical entity	653	13280	2.22199e-09	15366	hyaluronan mediated motility receptor (RHAMM)	Hmmr
GO	cellular anatomical entity	653	13280	2.22199e-09	15452	hypoxanthine guanine phosphoribosyl transferase	Hprt
GO	cellular anatomical entity	653	13280	2.22199e-09	15473	reactive intermediate imine deaminase A homolog	Rida
GO	cellular anatomical entity	653	13280	2.22199e-09	15483	hydroxysteroid 11-beta dehydrogenase 1	Hsd11b1
GO	cellular anatomical entity	653	13280	2.22199e-09	15507	heat shock protein 1	Hspb1
GO	cellular anatomical entity	653	13280	2.22199e-09	15893	islet cell autoantigen 1	Ica1
GO	cellular anatomical entity	653	13280	2.22199e-09	15898	intercellular adhesion molecule 5, telencephalin	Icam5
GO	cellular anatomical entity	653	13280	2.22199e-09	15900	interferon regulatory factor 8	Irf8
GO	cellular anatomical entity	653	13280	2.22199e-09	15903	inhibitor of DNA binding 3	Id3
GO	cellular anatomical entity	653	13280	2.22199e-09	15904	inhibitor of DNA binding 4	Id4
GO	cellular anatomical entity	653	13280	2.22199e-09	15925	insulin degrading enzyme	Ide
GO	cellular anatomical entity	653	13280	2.22199e-09	15985	CD79B antigen	Cd79b
GO	cellular anatomical entity	653	13280	2.22199e-09	16185	interleukin 2 receptor, beta chain	Il2rb
GO	cellular anatomical entity	653	13280	2.22199e-09	16192	interleukin 5 receptor, alpha	Il5ra
GO	cellular anatomical entity	653	13280	2.22199e-09	16196	interleukin 7	Il7
GO	cellular anatomical entity	653	13280	2.22199e-09	16399	integrin alpha 2b	Itga2b
GO	cellular anatomical entity	653	13280	2.22199e-09	16432	integral membrane protein 2B	Itm2b
GO	cellular anatomical entity	653	13280	2.22199e-09	16433	CUB and zona pellucida-like domains 1	Cuzd1
GO	cellular anatomical entity	653	13280	2.22199e-09	16494	potassium voltage-gated channel, shaker-related, subfamily, member 6	Kcna6
GO	cellular anatomical entity	653	13280	2.22199e-09	16517	potassium inwardly-rectifying channel, subfamily J, member 16	Kcnj16
GO	cellular anatomical entity	653	13280	2.22199e-09	16528	potassium channel, subfamily K, member 4	Kcnk4
GO	cellular anatomical entity	653	13280	2.22199e-09	16541	napsin A aspartic peptidase	Napsa
GO	cellular anatomical entity	653	13280	2.22199e-09	16558	kinesin family member 16B	Kif16b
GO	cellular anatomical entity	653	13280	2.22199e-09	16592	fatty acid binding protein 5, epidermal	Fabp5
GO	cellular anatomical entity	653	13280	2.22199e-09	16601	Kruppel-like factor 9	Klf9
GO	cellular anatomical entity	653	13280	2.22199e-09	16612	kallikrein 1	Klk1
GO	cellular anatomical entity	653	13280	2.22199e-09	16616	kallikrein 1-related peptidase b21	Klk1b21
GO	cellular anatomical entity	653	13280	2.22199e-09	16617	kallikrein 1-related peptidase b24	Klk1b24
GO	cellular anatomical entity	653	13280	2.22199e-09	16619	kallikrein 1-related peptidase b27	Klk1b27
GO	cellular anatomical entity	653	13280	2.22199e-09	16644	kininogen 1	Kng1
GO	cellular anatomical entity	653	13280	2.22199e-09	16784	lysosomal-associated membrane protein 2	Lamp2
GO	cellular anatomical entity	653	13280	2.22199e-09	16880	LIF receptor alpha	Lifr
GO	cellular anatomical entity	653	13280	2.22199e-09	16922	phytanoyl-CoA hydroxylase	Phyh
GO	cellular anatomical entity	653	13280	2.22199e-09	17060	B cell linker	Blnk
GO	cellular anatomical entity	653	13280	2.22199e-09	17068	lymphocyte antigen 6 complex, locus D	Ly6d
GO	cellular anatomical entity	653	13280	2.22199e-09	170728	reticulon 4 interacting protein 1	Rtn4ip1
GO	cellular anatomical entity	653	13280	2.22199e-09	17089	Ly1 antibody reactive clone	Lyar
GO	cellular anatomical entity	653	13280	2.22199e-09	171283	hepatitis A virus cellular receptor 1	Havcr1
GO	cellular anatomical entity	653	13280	2.22199e-09	171284	T cell immunoglobulin and mucin domain containing 2	Timd2
GO	cellular anatomical entity	653	13280	2.22199e-09	17155	mannosidase 1, alpha	Man1a
GO	cellular anatomical entity	653	13280	2.22199e-09	17252	retinol dehydrogenase 11	Rdh11
GO	cellular anatomical entity	653	13280	2.22199e-09	17341	basic helix-loop-helix family, member a15	Bhlha15
GO	cellular anatomical entity	653	13280	2.22199e-09	17388	matrix metallopeptidase 15	Mmp15
GO	cellular anatomical entity	653	13280	2.22199e-09	17436	malic enzyme 1, NADP(+)-dependent, cytosolic	Me1
GO	cellular anatomical entity	653	13280	2.22199e-09	17449	malate dehydrogenase 1, NAD (soluble)	Mdh1
GO	cellular anatomical entity	653	13280	2.22199e-09	18164	neuronal pentraxin 1	Nptx1
GO	cellular anatomical entity	653	13280	2.22199e-09	18208	netrin 1	Ntn1
GO	cellular anatomical entity	653	13280	2.22199e-09	18212	neurotrophic tyrosine kinase, receptor, type 2	Ntrk2
GO	cellular anatomical entity	653	13280	2.22199e-09	18220	nucleobindin 1	Nucb1
GO	cellular anatomical entity	653	13280	2.22199e-09	18300	oncoprotein induced transcript 1	Oit1
GO	cellular anatomical entity	653	13280	2.22199e-09	18440	purinergic receptor P2X, ligand-gated ion channel, 6	P2rx6
GO	cellular anatomical entity	653	13280	2.22199e-09	18453	prolyl 4-hydroxylase, beta polypeptide	P4hb
GO	cellular anatomical entity	653	13280	2.22199e-09	18483	paralemmin	Palm
GO	cellular anatomical entity	653	13280	2.22199e-09	18510	paired box 8	Pax8
GO	cellular anatomical entity	653	13280	2.22199e-09	18607	3-phosphoinositide dependent protein kinase 1	Pdpk1
GO	cellular anatomical entity	653	13280	2.22199e-09	18618	phosphatidylethanolamine N-methyltransferase	Pemt
GO	cellular anatomical entity	653	13280	2.22199e-09	18669	ATP-binding cassette, sub-family B (MDR/TAP), member 1B	Abcb1b
GO	cellular anatomical entity	653	13280	2.22199e-09	18671	ATP-binding cassette, sub-family B (MDR/TAP), member 1A	Abcb1a
GO	cellular anatomical entity	653	13280	2.22199e-09	18779	phospholipase A2 receptor 1	Pla2r1
GO	cellular anatomical entity	653	13280	2.22199e-09	18812	prolactin family 2, subfamily c, member 3	Prl2c3
GO	cellular anatomical entity	653	13280	2.22199e-09	18950	purine-nucleoside phosphorylase	Pnp
GO	cellular anatomical entity	653	13280	2.22199e-09	18973	polymerase (DNA directed), epsilon	Pole
GO	cellular anatomical entity	653	13280	2.22199e-09	19024	PTPRF interacting protein, binding protein 2 (liprin beta 2)	Ppfibp2
GO	cellular anatomical entity	653	13280	2.22199e-09	19027	synaptophysin-like protein	Sypl
GO	cellular anatomical entity	653	13280	2.22199e-09	19049	protein phosphatase 1, regulatory inhibitor subunit 1B	Ppp1r1b
GO	cellular anatomical entity	653	13280	2.22199e-09	19057	protein phosphatase 3, catalytic subunit, gamma isoform	Ppp3cc
GO	cellular anatomical entity	653	13280	2.22199e-09	19073	serglycin	Srgn
GO	cellular anatomical entity	653	13280	2.22199e-09	19111	prolactin family 6, subfamily a, member 1	Prl6a1
GO	cellular anatomical entity	653	13280	2.22199e-09	19123	protein C	Proc
GO	cellular anatomical entity	653	13280	2.22199e-09	19125	proline dehydrogenase	Prodh
GO	cellular anatomical entity	653	13280	2.22199e-09	19141	legumain	Lgmn
GO	cellular anatomical entity	653	13280	2.22199e-09	19142	protease, serine 12 neurotrypsin (motopsin)	Prss12
GO	cellular anatomical entity	653	13280	2.22199e-09	19152	proteinase 3	Prtn3
GO	cellular anatomical entity	653	13280	2.22199e-09	192169	UFM1-specific peptidase 2	Ufsp2
GO	cellular anatomical entity	653	13280	2.22199e-09	192193	ER degradation enhancer, mannosidase alpha-like 1	Edem1
GO	cellular anatomical entity	653	13280	2.22199e-09	192212	prominin 2	Prom2
GO	cellular anatomical entity	653	13280	2.22199e-09	19259	protein tyrosine phosphatase, non-receptor type 5	Ptpn5
GO	cellular anatomical entity	653	13280	2.22199e-09	19264	protein tyrosine phosphatase, receptor type, C	Ptprc
GO	cellular anatomical entity	653	13280	2.22199e-09	19329	RAB17, member RAS oncogene family	Rab17
GO	cellular anatomical entity	653	13280	2.22199e-09	19340	RAB3D, member RAS oncogene family	Rab3d
GO	cellular anatomical entity	653	13280	2.22199e-09	193740	heat shock protein 1A	Hspa1a
GO	cellular anatomical entity	653	13280	2.22199e-09	19378	aldehyde dehydrogenase family 1, subfamily A2	Aldh1a2
GO	cellular anatomical entity	653	13280	2.22199e-09	19416	RAS, dexamethasone-induced 1	Rasd1
GO	cellular anatomical entity	653	13280	2.22199e-09	194597	transmembrane protease, serine 11a	Tmprss11a
GO	cellular anatomical entity	653	13280	2.22199e-09	195208	doublecortin domain containing 2a	Dcdc2a
GO	cellular anatomical entity	653	13280	2.22199e-09	19662	retinol binding protein 4, plasma	Rbp4
GO	cellular anatomical entity	653	13280	2.22199e-09	19886	Ros1 proto-oncogene	Ros1
GO	cellular anatomical entity	653	13280	2.22199e-09	20014	ribophorin II	Rpn2
GO	cellular anatomical entity	653	13280	2.22199e-09	20135	ribonucleotide reductase M2	Rrm2
GO	cellular anatomical entity	653	13280	2.22199e-09	20192	ryanodine receptor 3	Ryr3
GO	cellular anatomical entity	653	13280	2.22199e-09	20238	ataxin 1	Atxn1
GO	cellular anatomical entity	653	13280	2.22199e-09	20322	sorbitol dehydrogenase	Sord
GO	cellular anatomical entity	653	13280	2.22199e-09	20351	sema domain, immunoglobulin domain (Ig), transmembrane domain (TM) and short cytoplasmic domain, (semaphorin) 4A	Sema4a
GO	cellular anatomical entity	653	13280	2.22199e-09	20363	selenoprotein P	Selenop
GO	cellular anatomical entity	653	13280	2.22199e-09	20393	serum/glucocorticoid regulated kinase 1	Sgk1
GO	cellular anatomical entity	653	13280	2.22199e-09	20394	secretogranin V	Scg5
GO	cellular anatomical entity	653	13280	2.22199e-09	20442	ST3 beta-galactoside alpha-2,3-sialyltransferase 1	St3gal1
GO	cellular anatomical entity	653	13280	2.22199e-09	20500	solute carrier family 13 (sodium-dependent dicarboxylate transporter), member 2	Slc13a2
GO	cellular anatomical entity	653	13280	2.22199e-09	20504	solute carrier family 17 (sodium phosphate), member 1	Slc17a1
GO	cellular anatomical entity	653	13280	2.22199e-09	20524	solute carrier family 25 (mitochondrial carrier, peroxisomal membrane protein), member 17	Slc25a17
GO	cellular anatomical entity	653	13280	2.22199e-09	20686	sperm autoantigenic protein 17	Spa17
GO	cellular anatomical entity	653	13280	2.22199e-09	207495	BAI1-associated protein 2-like 2	Baiap2l2
GO	cellular anatomical entity	653	13280	2.22199e-09	20750	secreted phosphoprotein 1	Spp1
GO	cellular anatomical entity	653	13280	2.22199e-09	207818	small cell adhesion glycoprotein	Smagp
GO	cellular anatomical entity	653	13280	2.22199e-09	20832	signal sequence receptor, delta	Ssr4
GO	cellular anatomical entity	653	13280	2.22199e-09	208727	histone deacetylase 4	Hdac4
GO	cellular anatomical entity	653	13280	2.22199e-09	20917	succinate-Coenzyme A ligase, GDP-forming, beta subunit	Suclg2
GO	cellular anatomical entity	653	13280	2.22199e-09	209378	inter-alpha (globulin) inhibitor H5	Itih5
GO	cellular anatomical entity	653	13280	2.22199e-09	209588	secreted and transmembrane 1A	Sectm1a
GO	cellular anatomical entity	653	13280	2.22199e-09	209773	DENN/MADD domain containing 2A	Dennd2a
GO	cellular anatomical entity	653	13280	2.22199e-09	210622	peptidase domain containing associated with muscle regeneration 1	Pamr1
GO	cellular anatomical entity	653	13280	2.22199e-09	210766	BRCA1/BRCA2-containing complex, subunit 3	Brcc3
GO	cellular anatomical entity	653	13280	2.22199e-09	211429	phospholipase A2, group IVB (cytosolic)	Pla2g4b
GO	cellular anatomical entity	653	13280	2.22199e-09	212539	predicted gene 266	Gm266
GO	cellular anatomical entity	653	13280	2.22199e-09	213068	transmembrane protein 71	Tmem71
GO	cellular anatomical entity	653	13280	2.22199e-09	214505	N-acetylglucosamine-1-phosphotransferase, gamma subunit	Gnptg
GO	cellular anatomical entity	653	13280	2.22199e-09	214523	transmembrane protease, serine 4	Tmprss4
GO	cellular anatomical entity	653	13280	2.22199e-09	214531	transmembrane protease, serine 13	Tmprss13
GO	cellular anatomical entity	653	13280	2.22199e-09	215303	calcium/calmodulin-dependent protein kinase I gamma	Camk1g
GO	cellular anatomical entity	653	13280	2.22199e-09	215446	ectonucleoside triphosphate diphosphohydrolase 3	Entpd3
GO	cellular anatomical entity	653	13280	2.22199e-09	216134	pyridoxal (pyridoxine, vitamin B6) kinase	Pdxk
GO	cellular anatomical entity	653	13280	2.22199e-09	216225	solute carrier family 5 (iodide transporter), member 8	Slc5a8
GO	cellular anatomical entity	653	13280	2.22199e-09	216350	tetraspanin 8	Tspan8
GO	cellular anatomical entity	653	13280	2.22199e-09	216363	RAB3A interacting protein	Rab3ip
GO	cellular anatomical entity	653	13280	2.22199e-09	217364	endo-beta-N-acetylglucosaminidase	Engase
GO	cellular anatomical entity	653	13280	2.22199e-09	21743	indolethylamine N-methyltransferase	Inmt
GO	cellular anatomical entity	653	13280	2.22199e-09	217517	syntaxin binding protein 6 (amisyn)	Stxbp6
GO	cellular anatomical entity	653	13280	2.22199e-09	217664	mannoside acetylglucosaminyltransferase 2	Mgat2
GO	cellular anatomical entity	653	13280	2.22199e-09	217837	inositol 1,3,4-triphosphate 5/6 kinase	Itpk1
GO	cellular anatomical entity	653	13280	2.22199e-09	217869	eukaryotic translation initiation factor 5	Eif5
GO	cellular anatomical entity	653	13280	2.22199e-09	21808	transforming growth factor, beta 2	Tgfb2
GO	cellular anatomical entity	653	13280	2.22199e-09	21809	transforming growth factor, beta 3	Tgfb3
GO	cellular anatomical entity	653	13280	2.22199e-09	218138	GDP-mannose 4, 6-dehydratase	Gmds
GO	cellular anatomical entity	653	13280	2.22199e-09	21817	transglutaminase 2, C polypeptide	Tgm2
GO	cellular anatomical entity	653	13280	2.22199e-09	21824	thrombomodulin	Thbd
GO	cellular anatomical entity	653	13280	2.22199e-09	218476	glucosaminyl (N-acetyl) transferase 4, core 2 (beta-1,6-N-acetylglucosaminyltransferase)	Gcnt4
GO	cellular anatomical entity	653	13280	2.22199e-09	218820	zinc finger protein 503	Zfp503
GO	cellular anatomical entity	653	13280	2.22199e-09	219072	HAUS augmin-like complex, subunit 4	Haus4
GO	cellular anatomical entity	653	13280	2.22199e-09	21912	tetraspanin 7	Tspan7
GO	cellular anatomical entity	653	13280	2.22199e-09	219135	myotubularin related protein 6	Mtmr6
GO	cellular anatomical entity	653	13280	2.22199e-09	21924	troponin C, cardiac/slow skeletal	Tnnc1
GO	cellular anatomical entity	653	13280	2.22199e-09	21936	tumor necrosis factor receptor superfamily, member 18	Tnfrsf18
GO	cellular anatomical entity	653	13280	2.22199e-09	21968	target of myb1 trafficking protein	Tom1
GO	cellular anatomical entity	653	13280	2.22199e-09	22095	thyroid stimulating hormone receptor	Tshr
GO	cellular anatomical entity	653	13280	2.22199e-09	22235	UDP-glucose dehydrogenase	Ugdh
GO	cellular anatomical entity	653	13280	2.22199e-09	22238	UDP glucuronosyltransferase 2 family, polypeptide B5	Ugt2b5
GO	cellular anatomical entity	653	13280	2.22199e-09	22286	undifferentiated embryonic cell transcription factor 1	Utf1
GO	cellular anatomical entity	653	13280	2.22199e-09	22296	vomeronasal 1 receptor 51	Vmn1r51
GO	cellular anatomical entity	653	13280	2.22199e-09	22337	vitamin D (1,25-dihydroxyvitamin D3) receptor	Vdr
GO	cellular anatomical entity	653	13280	2.22199e-09	22340	vascular endothelial growth factor B	Vegfb
GO	cellular anatomical entity	653	13280	2.22199e-09	22350	ezrin	Ezr
GO	cellular anatomical entity	653	13280	2.22199e-09	22368	transient receptor potential cation channel, subfamily V, member 2	Trpv2
GO	cellular anatomical entity	653	13280	2.22199e-09	223917	keratin 79	Krt79
GO	cellular anatomical entity	653	13280	2.22199e-09	22393	wolframin ER transmembrane glycoprotein	Wfs1
GO	cellular anatomical entity	653	13280	2.22199e-09	224022	solute carrier family 7 (cationic amino acid transporter, y+ system), member 4	Slc7a4
GO	cellular anatomical entity	653	13280	2.22199e-09	224116	mucin 20	Muc20
GO	cellular anatomical entity	653	13280	2.22199e-09	224132	solute carrier family 49 member 4	Slc49a4
GO	cellular anatomical entity	653	13280	2.22199e-09	22419	wingless-type MMTV integration site family, member 5B	Wnt5b
GO	cellular anatomical entity	653	13280	2.22199e-09	224454	zinc finger, DHHC domain containing 14	Zdhhc14
GO	cellular anatomical entity	653	13280	2.22199e-09	224647	inflammation and lipid regulator with UBA-like and NBR1-like domains	Ilrun
GO	cellular anatomical entity	653	13280	2.22199e-09	225579	solute carrier family 27 (fatty acid transporter), member 6	Slc27a6
GO	cellular anatomical entity	653	13280	2.22199e-09	225884	glutathione S-transferase pi 3	Gstp3
GO	cellular anatomical entity	653	13280	2.22199e-09	22594	X-ray repair complementing defective repair in Chinese hamster cells 1	Xrcc1
GO	cellular anatomical entity	653	13280	2.22199e-09	22598	solute carrier family 6 (neurotransmitter transporter), member 18	Slc6a18
GO	cellular anatomical entity	653	13280	2.22199e-09	226040	transmembrane protein 252	Tmem252
GO	cellular anatomical entity	653	13280	2.22199e-09	226143	cytochrome P450, family 2, subfamily c, polypeptide 23	Cyp2c23
GO	cellular anatomical entity	653	13280	2.22199e-09	226250	actin filament associated protein 1-like 2	Afap1l2
GO	cellular anatomical entity	653	13280	2.22199e-09	22626	solute carrier family 23 (nucleobase transporters), member 3	Slc23a3
GO	cellular anatomical entity	653	13280	2.22199e-09	226499	odr4 GPCR localization factor homolog	Odr4
GO	cellular anatomical entity	653	13280	2.22199e-09	226777	RIKEN cDNA C130074G19 gene	C130074G19Rik
GO	cellular anatomical entity	653	13280	2.22199e-09	226791	lysophospholipase-like 1	Lyplal1
GO	cellular anatomical entity	653	13280	2.22199e-09	226844	feline leukemia virus subgroup C cellular receptor 1	Flvcr1
GO	cellular anatomical entity	653	13280	2.22199e-09	226849	protein phosphatase 2, regulatory subunit B', alpha	Ppp2r5a
GO	cellular anatomical entity	653	13280	2.22199e-09	22696	zinc finger protein 37	Zfp37
GO	cellular anatomical entity	653	13280	2.22199e-09	227095	3-hydroxyisobutyryl-Coenzyme A hydrolase	Hibch
GO	cellular anatomical entity	653	13280	2.22199e-09	227627	odorant binding protein 2A	Obp2a
GO	cellular anatomical entity	653	13280	2.22199e-09	227801	DENN/MADD domain containing 1A	Dennd1a
GO	cellular anatomical entity	653	13280	2.22199e-09	22785	solute carrier family 30 (zinc transporter), member 4	Slc30a4
GO	cellular anatomical entity	653	13280	2.22199e-09	228859	fat storage-inducing transmembrane protein 2	Fitm2
GO	cellular anatomical entity	653	13280	2.22199e-09	229688	chitinase-like 6	Chil6
GO	cellular anatomical entity	653	13280	2.22199e-09	229722	endosome-lysosome associated apoptosis and autophagy regulator 1	Elapor1
GO	cellular anatomical entity	653	13280	2.22199e-09	229900	guanylate binding protein 7	Gbp7
GO	cellular anatomical entity	653	13280	2.22199e-09	229905	kynurenine aminotransferase 3	Kyat3
GO	cellular anatomical entity	653	13280	2.22199e-09	229937	zinc finger, HIT type 6	Znhit6
GO	cellular anatomical entity	653	13280	2.22199e-09	229949	adenylate kinase 5	Ak5
GO	cellular anatomical entity	653	13280	2.22199e-09	230678	transmembrane protein 125	Tmem125
GO	cellular anatomical entity	653	13280	2.22199e-09	231602	purinergic receptor P2X, ligand-gated ion channel, 2	P2rx2
GO	cellular anatomical entity	653	13280	2.22199e-09	232223	thioredoxin reductase 3	Txnrd3
GO	cellular anatomical entity	653	13280	2.22199e-09	232232	histone deacetylase 11	Hdac11
GO	cellular anatomical entity	653	13280	2.22199e-09	232984	UDP-GlcNAc:betaGal beta-1,3-N-acetylglucosaminyltransferase 8	B3gnt8
GO	cellular anatomical entity	653	13280	2.22199e-09	234199	fibrinogen-like protein 1	Fgl1
GO	cellular anatomical entity	653	13280	2.22199e-09	234669	carboxyesterase 2B	Ces2b
GO	cellular anatomical entity	653	13280	2.22199e-09	235459	general transcription factor II A, 2	Gtf2a2
GO	cellular anatomical entity	653	13280	2.22199e-09	235674	acetyl-Coenzyme A acyltransferase 1B	Acaa1b
GO	cellular anatomical entity	653	13280	2.22199e-09	238257	transmembrane protein 30B	Tmem30b
GO	cellular anatomical entity	653	13280	2.22199e-09	23882	growth arrest and DNA-damage-inducible 45 gamma	Gadd45g
GO	cellular anatomical entity	653	13280	2.22199e-09	23886	growth differentiation factor 15	Gdf15
GO	cellular anatomical entity	653	13280	2.22199e-09	23945	monoglyceride lipase	Mgll
GO	cellular anatomical entity	653	13280	2.22199e-09	23957	nuclear receptor subfamily 0, group B, member 2	Nr0b2
GO	cellular anatomical entity	653	13280	2.22199e-09	23984	phosphodiesterase 10A	Pde10a
GO	cellular anatomical entity	653	13280	2.22199e-09	240638	solute carrier family 16 (monocarboxylic acid transporters), member 12	Slc16a12
GO	cellular anatomical entity	653	13280	2.22199e-09	240675	von Willebrand factor A domain containing 2	Vwa2
GO	cellular anatomical entity	653	13280	2.22199e-09	240913	a disintegrin-like and metallopeptidase (reprolysin type) with thrombospondin type 1 motif, 4	Adamts4
GO	cellular anatomical entity	653	13280	2.22199e-09	24109	ubiquitin-like 3	Ubl3
GO	cellular anatomical entity	653	13280	2.22199e-09	241452	dehydrogenase/reductase (SDR family) member 9	Dhrs9
GO	cellular anatomical entity	653	13280	2.22199e-09	242126	solute carrier family 22 (organic anion/cation transporter), member 15	Slc22a15
GO	cellular anatomical entity	653	13280	2.22199e-09	243537	urocanase domain containing 1	Uroc1
GO	cellular anatomical entity	653	13280	2.22199e-09	244886	transmembrane protein 266	Tmem266
GO	cellular anatomical entity	653	13280	2.22199e-09	245050	golgi associated kinase 1A	Gask1a
GO	cellular anatomical entity	653	13280	2.22199e-09	245386	transmembrane protein 255A	Tmem255a
GO	cellular anatomical entity	653	13280	2.22199e-09	245527	ectodysplasin A2 receptor	Eda2r
GO	cellular anatomical entity	653	13280	2.22199e-09	245688	retinoblastoma binding protein 7, chromatin remodeling factor	Rbbp7
GO	cellular anatomical entity	653	13280	2.22199e-09	246133	potassium voltage-gated channel, Isk-related subfamily, gene 2	Kcne2
GO	cellular anatomical entity	653	13280	2.22199e-09	246696	solute carrier family 25, member 28	Slc25a28
GO	cellular anatomical entity	653	13280	2.22199e-09	26363	biotinidase	Btd
GO	cellular anatomical entity	653	13280	2.22199e-09	26434	prion like protein doppel	Prnd
GO	cellular anatomical entity	653	13280	2.22199e-09	26450	retinoblastoma binding protein 9, serine hydrolase	Rbbp9
GO	cellular anatomical entity	653	13280	2.22199e-09	264895	acyl-CoA synthetase family member 2	Acsf2
GO	cellular anatomical entity	653	13280	2.22199e-09	268534	syntrophin, gamma 2	Sntg2
GO	cellular anatomical entity	653	13280	2.22199e-09	26901	SS18, nBAF chromatin remodeling complex subunit like 2	Ss18l2
GO	cellular anatomical entity	653	13280	2.22199e-09	269116	neurofascin	Nfasc
GO	cellular anatomical entity	653	13280	2.22199e-09	269346	solute carrier family 28 (sodium-coupled nucleoside transporter), member 2	Slc28a2
GO	cellular anatomical entity	653	13280	2.22199e-09	269423	abhydrolase domain containing 18	Abhd18
GO	cellular anatomical entity	653	13280	2.22199e-09	270049	UDP-N-acetyl-alpha-D-galactosamine:polypeptide N-acetylgalactosaminyltransferase-like 6	Galntl6
GO	cellular anatomical entity	653	13280	2.22199e-09	270066	solute carrier family 35, member E1	Slc35e1
GO	cellular anatomical entity	653	13280	2.22199e-09	270166	caseinolytic mitochondrial matrix peptidase chaperone subunit	Clpx
GO	cellular anatomical entity	653	13280	2.22199e-09	270757	BPI fold containing family C	Bpifc
GO	cellular anatomical entity	653	13280	2.22199e-09	272589	tubulin folding cofactor E-like	Tbcel
[truncated: 12,661 more rows]

## Sheet: FFA83vsFF_Enriched Terms_down
Category	Term	Count in Selected Genes	Count in Total Population	P-value
GO	regulation of developmental process	166	2197	1.40231e-21
GO	anatomical structure morphogenesis	111	1179	4.15478e-21
GO	anatomical structure development	177	2648	2.01103e-17
GO	developmental process	229	3861	7.05752e-17
GO	regulation of multicellular organismal development	130	1741	3.88002e-16
GO	plasma membrane	194	3125	7.77149e-16
GO	regulation of multicellular organismal process	164	2509	4.36602e-15
GO	positive regulation of multicellular organismal process	113	1492	2.11686e-14
GO	regulation of anatomical structure morphogenesis	82	923	3.53813e-14
GO	cellular developmental process	143	2169	2.62961e-13
GO	positive regulation of developmental process	97	1241	3.39326e-13
GO	biological regulation	394	8550	4.4092e-13
GO	multicellular organismal process	162	2598	4.45555e-13
GO	regulation of cell differentiation	112	1541	4.5806e-13
GO	regulation of cell communication	164	2657	7.16577e-13
GO	regulation of signaling	164	2669	1.05498e-12
GO	regulation of cellular component movement	76	888	2.28724e-12
GO	regulation of signal transduction	146	2318	4.91442e-12
GO	anchoring junction	54	525	4.96573e-12
GO	regulation of locomotion	73	851	5.89012e-12
GO	membrane	301	6095	6.20245e-12
GO	multicellular organism development	83	1039	7.50774e-12
GO	regulation of biological process	373	8110	1.51858e-11
GO	locomotion	68	780	1.65054e-11
GO	regulation of cell motility	70	818	1.8869e-11
GO	movement of cell or subcellular component	83	1059	2.00714e-11
GO	cell surface receptor signaling pathway	93	1252	2.03468e-11
GO	signal transduction	161	2704	2.50598e-11
GO	cell motility	64	721	3.22179e-11
GO	regulation of cell migration	67	783	5.37074e-11
GO	regulation of cellular process	357	7723	5.73122e-11
GO	positive regulation of cell differentiation	74	914	6.46636e-11
GO	enzyme linked receptor protein signaling pathway	45	419	7.85989e-11
GO	cell migration	59	649	7.88761e-11
GO	negative regulation of cellular process	208	3862	1.08695e-10
GO	positive regulation of phosphorylation	71	871	1.22108e-10
GO	positive regulation of phosphate metabolic process	74	928	1.30652e-10
GO	positive regulation of phosphorus metabolic process	74	928	1.30652e-10
GO	cell-cell junction	44	410	1.31985e-10
GO	cell adhesion	55	590	1.41823e-10
GO	cell differentiation	109	1631	1.82824e-10
GO	biological adhesion	55	600	2.66452e-10
GO	positive regulation of biological process	243	4780	3.59276e-10
GO	regulation of phosphate metabolic process	99	1443	3.6775e-10
GO	cell-cell adhesion	36	302	3.79625e-10
GO	regulation of phosphorus metabolic process	99	1444	3.81984e-10
GO	positive regulation of cellular process	228	4423	5.51748e-10
GO	nervous system development	36	313	1.02381e-09
GO	regulation of response to stimulus	170	3054	1.26953e-09
GO	regulation of nervous system development	68	864	1.3886e-09
GO	cell junction	95	1399	1.53826e-09
GO	regulation of cell development	69	896	2.58322e-09
GO	cell junction organization	36	325	2.85399e-09
GO	regulation of phosphorylation	90	1315	3.06763e-09
GO	positive regulation of nervous system development	48	523	3.76254e-09
GO	biological_process	551	14155	3.79321e-09
GO	regulation of cell morphogenesis	45	473	3.91066e-09
GO	protein binding	336	7360	4.1493e-09
GO	negative regulation of biological process	216	4218	4.31028e-09
GO	system development	50	561	4.67804e-09
GO	positive regulation of cell development	49	546	5.37142e-09
GO	regulation of localization	135	2308	6.16779e-09
GO	negative regulation of developmental process	65	842	7.13879e-09
GO	molecular transducer activity	51	592	1.01644e-08
GO	signaling receptor activity	51	592	1.01644e-08
GO	cell adhesion molecule binding	28	224	1.23803e-08
GO	adherens junction	20	122	1.6069e-08
GO	transmembrane receptor protein tyrosine kinase signaling pathway	32	287	1.87928e-08
GO	positive regulation of protein phosphorylation	62	811	2.35798e-08
GO	actin filament-based process	37	371	2.91562e-08
GO	regulation of protein phosphorylation	81	1193	3.05709e-08
GO	intrinsic component of membrane	182	3482	3.59717e-08
GO	actin cytoskeleton organization	34	330	4.85913e-08
GO	positive regulation of cellular component movement	45	514	4.86832e-08
GO	positive regulation of cell motility	44	497	4.99446e-08
GO	positive regulation of neurogenesis	43	481	5.40199e-08
GO	regulation of neuron differentiation	52	642	5.55671e-08
GO	cell surface	45	517	5.77897e-08
GO	animal organ morphogenesis	40	432	6.2147e-08
GO	positive regulation of cell migration	43	484	6.45056e-08
GO	negative regulation of cell communication	76	1112	6.61276e-08
GO	regulation of cellular component organization	121	2085	7.66179e-08
GO	negative regulation of signaling	76	1116	7.66559e-08
GO	regulation of neurogenesis	59	780	7.69008e-08
GO	tube morphogenesis	29	260	8.71291e-08
GO	positive regulation of locomotion	44	508	9.39506e-08
GO	animal organ development	72	1042	9.98353e-08
GO	positive regulation of kinase activity	40	440	1.02039e-07
GO	intrinsic component of plasma membrane	58	771	1.2062e-07
GO	positive regulation of signaling	91	1445	1.31531e-07
GO	integral component of membrane	174	3351	1.38501e-07
GO	developmental growth involved in morphogenesis	17	102	1.49669e-07
GO	transmembrane signaling receptor activity	41	464	1.52733e-07
GO	regulation of cell projection organization	53	686	1.89609e-07
GO	dendrite	38	416	1.89786e-07
GO	neuron projection morphogenesis	25	210	1.95387e-07
GO	positive regulation of cell communication	90	1439	2.12768e-07
GO	neuron projection	67	965	2.4474e-07
GO	positive regulation of neuron differentiation	36	387	2.5731e-07
GO	neuron projection development	29	274	2.69439e-07
GO	regulation of cellular component biogenesis	57	771	2.78453e-07
GO	receptor complex	29	275	2.91093e-07
GO	regulation of plasma membrane bounded cell projection organization	52	678	3.12658e-07
GO	plasma membrane bounded cell projection morphogenesis	25	216	3.36215e-07
GO	zonula adherens	5	6	3.67345e-07
GO	plasma membrane region	61	858	3.99482e-07
GO	negative regulation of response to stimulus	84	1333	4.23688e-07
GO	regulation of intracellular signal transduction	86	1376	4.28155e-07
GO	regulation of neuron projection development	43	521	4.98828e-07
GO	cell projection morphogenesis	25	222	5.66137e-07
GO	regulation of small GTPase mediated signal transduction	26	239	6.60108e-07
GO	integral component of plasma membrane	53	715	6.9078e-07
GO	positive regulation of signal transduction	80	1264	7.00294e-07
GO	regulation of Ras protein signal transduction	24	210	7.278e-07
GO	negative regulation of multicellular organismal process	68	1015	7.28636e-07
GO	anatomical structure formation involved in morphogenesis	50	661	8.04028e-07
GO	cell projection	102	1752	9.05406e-07
GO	positive regulation of transferase activity	42	515	9.30854e-07
GO	regulation of cell death	88	1445	9.32155e-07
GO	transmembrane receptor protein kinase activity	12	58	9.38994e-07
GO	actin binding	34	374	9.4364e-07
GO	response to organic cyclic compound	37	431	1.25664e-06
GO	regulation of kinase activity	50	673	1.3594e-06
GO	regulation of actin filament-based process	33	363	1.36535e-06
GO	non-canonical Wnt signaling pathway	9	32	1.40647e-06
GO	negative regulation of cell differentiation	47	619	1.57235e-06
GO	regulation of cell adhesion	46	602	1.71599e-06
GO	response to lipid	38	455	1.75939e-06
GO	regulation of biological quality	149	2872	1.79558e-06
GO	positive regulation of protein modification process	67	1024	2.02585e-06
GO	cell projection organization	55	784	2.32668e-06
GO	negative regulation of signal transduction	66	1010	2.54043e-06
GO	tissue morphogenesis	31	340	2.6863e-06
GO	positive regulation of vasculature development	20	166	2.6924e-06
GO	binding	425	10299	2.80822e-06
GO	signaling receptor binding	76	1226	3.00298e-06
GO	negative regulation of cell death	60	892	3.05451e-06
GO	epithelial cell-cell adhesion	6	13	3.14237e-06
GO	positive regulation of molecular function	78	1273	3.38913e-06
GO	growth	29	312	3.86208e-06
GO	cell part morphogenesis	25	247	4.03255e-06
GO	cellular component morphogenesis	25	247	4.03255e-06
GO	cell-cell signaling	23	218	4.88556e-06
GO	developmental growth	28	299	4.91145e-06
GO	cell junction assembly	20	173	5.10129e-06
GO	response to chemical	111	2030	5.53767e-06
GO	cytoskeleton organization	53	769	5.99059e-06
GO	cellular component organization	189	3929	7.079e-06
GO	regulation of cell morphogenesis involved in differentiation	28	305	7.16903e-06
GO	positive regulation of MAPK cascade	35	430	7.96754e-06
GO	axon guidance	18	149	8.13241e-06
GO	positive regulation of cellular protein metabolic process	79	1328	8.71829e-06
GO	positive regulation of response to stimulus	96	1707	8.81608e-06
GO	neuron projection guidance	18	150	8.93461e-06
GO	synapse organization	19	165	9.2693e-06
GO	PDZ domain binding	14	96	9.45892e-06
GO	regulation of cell junction assembly	19	166	1.01194e-05
GO	regulation of actin cytoskeleton organization	29	329	1.08198e-05
GO	response to wounding	17	139	1.22531e-05
GO	regulation of synapse organization	22	215	1.27653e-05
GO	regulation of molecular function	114	2138	1.28756e-05
GO	regulation of synapse assembly	13	86	1.31873e-05
GO	positive regulation of protein kinase activity	32	386	1.34886e-05
GO	negative regulation of locomotion	25	265	1.38521e-05
GO	positive regulation of catalytic activity	61	959	1.44386e-05
GO	regulation of protein modification process	87	1525	1.46397e-05
GO	regulation of transferase activity	52	775	1.54858e-05
GO	Wnt-protein binding	7	24	1.65536e-05
GO	negative regulation of cellular component movement	25	268	1.67987e-05
GO	plasma membrane bounded cell projection	84	1465	1.74815e-05
GO	regulation of programmed cell death	77	1311	1.80084e-05
GO	regulation of cellular response to growth factor stimulus	22	220	1.83385e-05
GO	cellular_component	550	14449	1.89496e-05
GO	Wnt-activated receptor activity	6	17	2.00017e-05
GO	positive regulation of protein metabolic process	81	1405	2.0786e-05
GO	epithelial cell differentiation	22	222	2.11233e-05
GO	regulation of developmental growth	28	324	2.20077e-05
GO	positive regulation of neuron projection development	28	325	2.32756e-05
GO	actin crosslink formation	5	11	2.42861e-05
GO	signaling	24	258	2.58471e-05
GO	cellular component organization or biogenesis	189	4009	2.60379e-05
GO	neuromuscular junction	12	79	2.68644e-05
GO	regulation of smooth muscle cell migration	12	79	2.68644e-05
GO	positive regulation of cell projection organization	33	419	2.82011e-05
GO	transmembrane receptor protein tyrosine kinase activity	9	45	2.91126e-05
GO	blood vessel morphogenesis	13	93	3.11582e-05
GO	positive regulation of intracellular signal transduction	52	796	3.18263e-05
GO	regulation of axonogenesis	19	180	3.20138e-05
GO	cellular response to chemical stimulus	78	1357	3.34065e-05
GO	regulation of protein kinase activity	42	596	3.43025e-05
GO	positive regulation of cellular component biogenesis	32	405	3.49731e-05
GO	regulation of cell population proliferation	51	779	3.59192e-05
GO	regulation of phosphatidylinositol 3-kinase signaling	12	82	3.93546e-05
GO	activin binding	5	12	4.03864e-05
GO	positive regulation of metabolic process	149	3039	4.09687e-05
GO	negative regulation of developmental growth	14	109	4.10616e-05
GO	regulation of collagen metabolic process	9	47	4.19537e-05
GO	positive regulation of cellular component organization	63	1039	4.43833e-05
GO	actin filament bundle organization	11	71	4.79905e-05
GO	cell differentiation involved in salivary gland development	3	3	4.8121e-05
GO	zonula adherens maintenance	3	3	4.8121e-05
GO	regulation of MAPK cascade	42	605	4.84057e-05
GO	actin filament bundle	12	84	5.02383e-05
GO	developmental cell growth	12	84	5.02383e-05
GO	morphogenesis of an epithelium	24	270	5.38505e-05
GO	cellular anatomical entity	515	13280	5.55002e-05
GO	positive regulation of smooth muscle cell migration	10	60	5.55612e-05
GO	integrin binding	14	112	5.56752e-05
GO	regulation of anatomical structure size	30	379	5.91585e-05
GO	cell-substrate junction	17	157	5.98371e-05
GO	regulation of actin filament bundle assembly	13	99	6.08402e-05
GO	positive regulation of cellular metabolic process	134	2696	6.1477e-05
GO	modulation of chemical synaptic transmission	30	380	6.20764e-05
GO	axon extension	7	29	6.37053e-05
GO	regulation of trans-synaptic signaling	30	381	6.51236e-05
GO	kinase binding	48	735	6.51424e-05
GO	regulation of protein metabolic process	117	2291	6.66473e-05
GO	extracellular region	63	1055	6.93795e-05
GO	regulation of cytoskeleton organization	37	516	7.02975e-05
GO	cytoskeleton	77	1365	7.0523e-05
GO	regulation of cell shape	16	144	7.18409e-05
GO	cell surface receptor signaling pathway involved in cell-cell signaling	20	208	7.58566e-05
GO	actin filament organization	21	225	7.78301e-05
GO	cell junction maintenance	7	30	8.05046e-05
GO	establishment of epithelial cell polarity	7	30	8.05046e-05
GO	response to oxygen-containing compound	57	931	8.05969e-05
GO	cytoskeletal protein binding	53	847	8.30802e-05
GO	regulation of chemotaxis	18	177	8.36618e-05
GO	regulation of growth	41	600	8.44317e-05
GO	response to organic substance	89	1646	8.47654e-05
GO	positive regulation of cell population proliferation	34	464	9.06709e-05
GO	focal adhesion	16	147	9.20335e-05
GO	regulation of protein serine/threonine kinase activity	30	389	9.47975e-05
GO	positive regulation of MAP kinase activity	19	195	9.54993e-05
GO	regulation of apoptotic process	73	1288	9.57042e-05
GO	negative regulation of programmed cell death	50	789	9.72666e-05
GO	branching involved in blood vessel morphogenesis	7	31	0.000100747
GO	frizzled binding	7	31	0.000100747
GO	regulation of catalytic activity	86	1585	0.000100777
GO	ossification	13	104	0.000101918
GO	regulation of MAP kinase activity	23	264	0.000103951
GO	regulation of cytosolic calcium ion concentration	21	230	0.000106544
GO	regulation of supramolecular fiber organization	27	336	0.000106824
GO	negative regulation of hippo signaling	4	8	0.000108591
GO	mitral valve morphogenesis	4	8	0.000108591
GO	cell-cell junction organization	15	134	0.000110213
GO	cardiac septum morphogenesis	10	65	0.000112055
GO	regulation of vasculature development	24	283	0.000112539
GO	neuromuscular junction development	8	42	0.000116694
GO	regulation of collagen biosynthetic process	8	42	0.000116694
GO	extracellular matrix organization	19	198	0.000117009
GO	regulation of cellular protein metabolic process	110	2156	0.00012106
GO	regulation of organ growth	12	92	0.000123854
GO	extracellular structure organization	19	199	0.000125072
GO	cell-cell contact zone	10	66	0.000127827
GO	regulation of Rho protein signal transduction	14	121	0.000129987
GO	cell communication	31	415	0.000130309
GO	chloride channel complex	6	23	0.000135354
GO	positive regulation of protein autophosphorylation	6	23	0.000135354
GO	transmembrane transporter complex	18	184	0.000137631
GO	regulation of cell proliferation	18	184	0.000137631
GO	Golgi lumen	5	15	0.000139803
GO	cytoplasm	253	5792	0.000141764
GO	regulation of ERK1 and ERK2 cascade	22	252	0.000141781
GO	cell growth	12	94	0.000152603
GO	establishment or maintenance of cell polarity	16	154	0.000159484
GO	Wnt signaling pathway	19	203	0.000162435
GO	actin filament bundle assembly	10	68	0.000165039
GO	embryonic morphogenesis	27	345	0.000165259
GO	regulation of cell-substrate adhesion	18	187	0.000168856
GO	cortical cytoskeleton organization	9	56	0.000174289
GO	neuron projection extension	9	56	0.000174289
GO	regulation of neuroblast proliferation	6	24	0.000174954
GO	regulation of postsynaptic density protein 95 clustering	3	4	0.000187251
GO	positive regulation of muscle contraction	7	34	0.000187464
GO	trans-synaptic signaling, modulating synaptic transmission	4	9	0.000189832
GO	adherens junction maintenance	4	9	0.000189832
GO	system process	54	897	0.00019138
GO	negative regulation of supramolecular fiber organization	15	141	0.000195281
GO	regulation of phospholipid biosynthetic process	5	16	0.00019728
GO	positive regulation of ERK1 and ERK2 cascade	17	173	0.000198371
GO	protein tyrosine kinase activity	13	111	0.000198403
GO	negative regulation of cell development	25	312	0.000199107
GO	positive regulation of JNK cascade	14	126	0.000200382
GO	inorganic anion transmembrane transporter activity	12	97	0.000206343
GO	protein domain specific binding	45	709	0.000210413
GO	molecular_function	536	14062	0.000215327
GO	transmembrane receptor protein serine/threonine kinase signaling pathway	14	127	0.000217845
GO	transporter complex	18	191	0.000220045
GO	angiogenesis	21	243	0.000229449
GO	positive regulation of phosphatidylinositol 3-kinase signaling	9	58	0.000229653
GO	regulation of Wnt signaling pathway	22	261	0.000233987
GO	ameboidal-type cell migration	15	144	0.000246373
GO	negative regulation of growth	20	228	0.000263809
GO	synaptic signaling	15	145	0.00026579
GO	trans-synaptic signaling	15	145	0.00026579
GO	positive regulation of nitrogen compound metabolic process	124	2541	0.000275684
GO	tissue development	35	513	0.000285347
GO	membrane raft	24	301	0.000285555
GO	response to endogenous stimulus	43	678	0.000295194
GO	positive regulation of blood circulation	9	60	0.000298877
GO	membrane microdomain	24	302	0.00029987
GO	regulation of actin filament organization	21	249	0.000319689
GO	positive regulation of macromolecule metabolic process	134	2796	0.000320697
GO	negative regulation of organ growth	7	37	0.000326367
GO	regulation of animal organ morphogenesis	16	164	0.000328647
GO	regulation of blood vessel diameter	13	117	0.000335293
GO	regulation of tube diameter	13	117	0.000335293
GO	SMAD binding	10	74	0.000335428
GO	positive regulation of collagen biosynthetic process	6	27	0.000350589
GO	positive regulation of protein serine/threonine kinase activity	21	251	0.000356006
GO	cell activation	30	420	0.000358807
GO	bone remodeling	5	18	0.000364247
GO	cell-cell junction maintenance	5	18	0.000364247
GO	regulation of tube size	13	118	0.000364548
GO	negative regulation of apoptotic process	47	770	0.000369112
GO	cell morphogenesis	19	217	0.000381425
GO	positive regulation of stress-activated MAPK cascade	15	150	0.000383935
GO	plasma membrane bounded cell projection organization	38	583	0.000390814
GO	negative regulation of cellular response to growth factor stimulus	13	119	0.000395947
GO	regulation of muscle contraction	12	104	0.000397337
GO	positive regulation of synapse assembly	8	50	0.000411
GO	neuron spine	15	151	0.000412318
GO	positive regulation of angiogenesis	15	151	0.000412318
GO	synapse	51	861	0.000422033
GO	axon	26	347	0.000426048
GO	extracellular space	54	927	0.000427832
GO	branching morphogenesis of an epithelial tube	13	120	0.000429614
GO	positive regulation of stress-activated protein kinase signaling cascade	15	152	0.000442481
GO	morphogenesis of a branching epithelium	14	136	0.00044336
GO	negative regulation of nervous system development	23	292	0.000450948
GO	negative regulation of hair follicle development	3	5	0.000455423
GO	lymphocyte aggregation	3	5	0.000455423
GO	regulation of phosphatidylcholine biosynthetic process	3	5	0.000455423
GO	fascia adherens	4	11	0.000468995
GO	commissural neuron axon guidance	4	11	0.000468995
GO	atrioventricular valve morphogenesis	5	19	0.000479622
GO	membrane region	24	312	0.000481679
GO	intracellular signal transduction	64	1156	0.000498936
GO	positive regulation of peptidyl-tyrosine phosphorylation	15	154	0.00050851
GO	protein kinase binding	41	654	0.000513714
GO	positive regulation of collagen metabolic process	6	29	0.000528834
GO	cortical actin cytoskeleton organization	7	40	0.000537714
GO	neural crest cell migration	7	40	0.000537714
GO	supramolecular fiber organization	28	392	0.000558368
GO	establishment of cell polarity	10	79	0.000571783
GO	cellular response to lipid	22	279	0.000586666
GO	ion channel complex	16	173	0.000595756
GO	regulation of system process	29	414	0.000612757
GO	negative regulation of striated muscle tissue development	8	53	0.000616606
GO	regulation of cell growth	27	375	0.000617131
GO	monoamine transport	5	20	0.000620478
GO	cellular response to organic substance	61	1098	0.000621745
GO	cell cortex	15	157	0.000623261
GO	neuron recognition	7	41	0.000628337
GO	motor neuron axon guidance	6	30	0.000640916
GO	regulation of muscle system process	16	175	0.000675497
GO	regulation of hippo signaling	4	12	0.000683299
GO	atrial septum morphogenesis	4	12	0.000683299
GO	morphogenesis of a branching structure	14	142	0.000685456
GO	regulation of stem cell proliferation	9	67	0.000689866
GO	cell population proliferation	23	303	0.000752236
GO	regulation of blood circulation	15	160	0.000759367
GO	integrin-mediated signaling pathway	9	68	0.000769925
GO	negative regulation of actin filament bundle assembly	6	31	0.000770557
GO	vascular process in circulatory system	14	144	0.000787712
GO	catenin complex	5	21	0.000790181
GO	cortical actin cytoskeleton	8	55	0.00079477
GO	cadherin binding	8	55	0.00079477
GO	negative regulation of muscle organ development	8	55	0.00079477
GO	negative regulation of muscle tissue development	8	55	0.00079477
GO	plasma membrane protein complex	27	382	0.000816341
GO	cellular process	432	10932	0.000816692
GO	dendritic spine	14	145	0.00084349
GO	muscle cell differentiation	10	83	0.000847857
GO	regulation of neural precursor cell proliferation	10	83	0.000847857
GO	hair cycle process	9	69	0.00085739
GO	molting cycle process	9	69	0.00085739
GO	cell-cell adhesion via plasma-membrane adhesion molecules	13	129	0.00085795
GO	negative regulation of Wnt signaling pathway	13	129	0.00085795
GO	regulation of spontaneous synaptic transmission	3	6	0.000886173
GO	negative regulation of hair cycle	3	6	0.000886173
GO	substrate-dependent cell migration	3	6	0.000886173
GO	catecholamine uptake	3	6	0.000886173
GO	dopamine uptake	3	6	0.000886173
GO	regulation of peptidyl-tyrosine phosphorylation	18	215	0.000910568
GO	negative regulation of blood vessel diameter	6	32	0.000919545
GO	negative regulation of neurogenesis	21	270	0.000924056
GO	response to stimulus	168	3728	0.000942611
GO	chloride transmembrane transporter activity	9	70	0.000952762
GO	adherens junction organization	7	44	0.000974652
GO	positive regulation of epithelial cell migration	13	131	0.00099076
GO	smooth muscle cell differentiation	5	22	0.000992234
GO	gland morphogenesis	5	22	0.000992234
GO	regulation of stress fiber assembly	10	85	0.00102229
GO	circulatory system process	15	165	0.00104218
GO	positive regulation of cytosolic calcium ion concentration	17	200	0.00105859
GO	semaphorin-plexin signaling pathway	6	33	0.00108974
GO	regulation of JNK cascade	15	166	0.00110829
GO	receptor clustering	7	45	0.00111853
GO	cellular component maintenance	7	45	0.00111853
GO	dendrite development	7	45	0.00111853
GO	channel activity	22	293	0.00111969
GO	passive transmembrane transporter activity	22	293	0.00111969
GO	structural constituent of cytoskeleton	8	58	0.0011373
GO	anion channel activity	8	58	0.0011373
GO	regulation of BMP signaling pathway	9	72	0.00116933
GO	Wnt signaling pathway, planar cell polarity pathway	5	23	0.00123026
GO	negative regulation of axon extension involved in axon guidance	5	23	0.00123026
GO	intercalated disc	7	46	0.00127855
GO	stem cell division	6	34	0.00128309
GO	G protein-coupled receptor signaling pathway	28	414	0.00128756
GO	negative regulation of interleukin-1 production	4	14	0.00130374
GO	animal organ formation	4	14	0.00130374
GO	collateral sprouting in absence of injury	2	2	0.00132524
GO	regulation of cellular response to thapsigargin	2	2	0.00132524
GO	regulation of cellular response to tunicamycin	2	2	0.00132524
GO	chromaffin granule	2	2	0.00132524
GO	protein localization to secretory granule	2	2	0.00132524
GO	trans-synaptic signaling by endocannabinoid, modulating synaptic transmission	2	2	0.00132524
GO	trans-synaptic signaling by lipid, modulating synaptic transmission	2	2	0.00132524
GO	primary lung bud formation	2	2	0.00132524
GO	integrin alpha5-beta1 complex	2	2	0.00132524
GO	laminin-2 complex	2	2	0.00132524
GO	transforming growth factor beta receptor, inhibitory cytoplasmic mediator activity	2	2	0.00132524
GO	excitatory chemical synaptic transmission	2	2	0.00132524
GO	cellular response to redox state	2	2	0.00132524
GO	chondroitin 6-sulfotransferase activity	2	2	0.00132524
GO	negative regulation of transmembrane receptor protein serine/threonine kinase signaling pathway	10	88	0.0013381
GO	inorganic anion transport	10	88	0.0013381
GO	regulation of phospholipid metabolic process	8	60	0.00142465
GO	negative regulation of axonogenesis	8	60	0.00142465
GO	regulation of stress-activated MAPK cascade	17	206	0.00146237
GO	negative regulation of cardiac muscle tissue development	6	35	0.00150158
GO	outflow tract septum morphogenesis	5	24	0.00150797
GO	negative regulation of axon guidance	5	24	0.00150797
GO	activin-activated receptor activity	3	7	0.00150887
GO	regulation of amyloid fibril formation	3	7	0.00150887
GO	dopamine transport	3	7	0.00150887
GO	regulation of phosphatidylcholine metabolic process	3	7	0.00150887
GO	lamellipodium	14	154	0.00151307
GO	positive regulation of cell proliferation	28	419	0.00153822
GO	negative regulation of neuron differentiation	17	207	0.00154093
GO	contractile actin filament bundle	9	75	0.00156711
GO	stress fiber	9	75	0.00156711
GO	growth cone	15	172	0.00158363
GO	BMP signaling pathway	8	61	0.00158845
GO	canonical Wnt signaling pathway	8	61	0.00158845
GO	basement membrane	10	90	0.00158966
GO	embryonic organ development	13	138	0.00159857
GO	activation of protein kinase activity	17	208	0.00162302
GO	chloride channel activity	7	48	0.00165194
GO	regulation of stress-activated protein kinase signaling cascade	17	209	0.00170876
GO	regulation of hormone levels	27	402	0.00172384
GO	negative regulation of pri-miRNA transcription by RNA polymerase II	4	15	0.00172699
GO	in utero embryonic development	20	265	0.00173858
GO	cation homeostasis	33	526	0.00174578
GO	cellular cation homeostasis	30	464	0.00176879
GO	negative regulation of cell growth	15	174	0.00177579
GO	regulation of metabolic process	215	5005	0.00182312
GO	metal ion homeostasis	30	465	0.00182763
GO	mitogen-activated protein kinase kinase kinase binding	5	25	0.00182917
GO	synapse assembly	7	49	0.00186785
GO	cellular response to organic cyclic compound	19	248	0.00189022
GO	molecular function regulator	113	2398	0.00193177
GO	localization within membrane	8	63	0.00196062
GO	chloride transport	8	63	0.00196062
GO	heart valve morphogenesis	6	37	0.00202229
GO	Rho GTPase binding	14	159	0.00204628
GO	ion channel activity	20	269	0.00207436
GO	regulation of vasoconstriction	7	50	0.00210502
GO	lateral plasma membrane	7	50	0.00210502
GO	cellular metal ion homeostasis	27	408	0.00212697
GO	negative regulation of stress fiber assembly	5	26	0.00219772
GO	regulation of long-term neuronal synaptic plasticity	5	26	0.00219772
GO	regulation of fibroblast growth factor receptor signaling pathway	5	26	0.00219772
GO	negative regulation of cellular component organization	37	619	0.00219796
GO	regulation of actomyosin structure organization	10	94	0.00220775
GO	negative regulation of cell projection organization	15	178	0.00221882
GO	endocardial cushion morphogenesis	4	16	0.00223689
GO	axis elongation	4	16	0.00223689
GO	positive regulation of neuroblast proliferation	4	16	0.00223689
GO	negative regulation of cardiac muscle cell proliferation	4	16	0.00223689
GO	response to cholesterol	4	16	0.00223689
GO	establishment of epithelial cell apical/basal polarity	4	16	0.00223689
GO	regulation of primary metabolic process	189	4343	0.00224319
GO	chordate embryonic development	20	271	0.00226183
GO	regulation of cellular metabolic process	196	4527	0.00227827
GO	embryo development	23	330	0.00231388
GO	regulation of axon guidance	6	38	0.00232879
GO	site of polarized growth	15	179	0.00234286
GO	positive regulation of cardiac epithelial to mesenchymal transition	3	8	0.00234904
GO	regulation of oligodendrocyte progenitor proliferation	3	8	0.00234904
GO	positive regulation of anion transmembrane transport	3	8	0.00234904
GO	positive regulation of cardiac muscle contraction	3	8	0.00234904
GO	negative regulation of cell adhesion mediated by integrin	3	8	0.00234904
GO	linoleic acid metabolic process	3	8	0.00234904
GO	juxtaparanode region of axon	3	8	0.00234904
GO	axon guidance receptor activity	3	8	0.00234904
GO	ephrin receptor activity	3	8	0.00234904
GO	endodermal cell differentiation	3	8	0.00234904
GO	vascular associated smooth muscle cell differentiation	3	8	0.00234904
GO	regulation of morphogenesis of an epithelium	10	95	0.0023891
GO	positive regulation of chemotaxis	11	111	0.00239749
GO	leukocyte activation	25	371	0.00240677
GO	inorganic ion homeostasis	33	537	0.00242862
GO	vesicle	79	1586	0.00243716
GO	cellular ion homeostasis	30	474	0.00243759
GO	gated channel activity	16	198	0.00246487
GO	regulation of transmembrane transporter activity	16	198	0.00246487
GO	positive regulation of cell junction assembly	9	80	0.00246523
GO	cell-substrate adhesion	12	128	0.00248219
GO	regulation of transport	75	1493	0.0025338
GO	positive regulation of cell-substrate adhesion	11	112	0.00257359
GO	actin filament binding	15	181	0.00260824
GO	ephrin receptor signaling pathway	5	27	0.00261752
GO	negative regulation of cardiac muscle tissue growth	5	27	0.00261752
GO	negative regulation of heart growth	5	27	0.00261752
GO	regulation of heart growth	8	66	0.00264399
GO	vasculogenesis	8	66	0.00264399
GO	regulation of cartilage development	7	52	0.00264857
GO	positive regulation of protein tyrosine kinase activity	6	39	0.00266897
GO	regulation of epithelial cell migration	16	200	0.00272623
GO	regulation of extent of cell growth	11	113	0.00276001
GO	neuronal cell body	30	478	0.00276029
GO	regulation of neuron death	22	315	0.00278047
GO	plasma membrane raft	10	97	0.00278762
GO	positive regulation of synaptic transmission	12	130	0.00282434
GO	negative regulation of cell motility	18	238	0.00282675
GO	protein phosphorylation	37	629	0.00287895
GO	wound healing	8	67	0.00290895
GO	positive regulation of JUN kinase activity	8	67	0.00290895
GO	embryonic heart tube morphogenesis	7	53	0.00295778
GO	negative regulation of cytoskeleton organization	13	148	0.00297576
GO	negative regulation of neuron projection development	13	148	0.00297576
GO	cytoplasmic vesicle	74	1479	0.00299811
GO	growth factor binding	12	131	0.00300924
GO	actin cytoskeleton	16	202	0.00301016
GO	regulation of interleukin-1 production	6	40	0.00304507
GO	regulation of synaptic plasticity	14	166	0.00304607
GO	regulation of axon extension involved in axon guidance	5	28	0.0030925
GO	intracellular vesicle	74	1482	0.00315541
GO	regulation of angiogenesis	19	260	0.00321014
GO	regulation of transmembrane receptor protein serine/threonine kinase signaling pathway	15	185	0.00321379
GO	postsynapse	17	222	0.00321767
GO	negative regulation of neuron death	16	204	0.00331813
GO	ion homeostasis	35	591	0.00332251
GO	synaptic membrane	17	223	0.00336921
GO	enzyme binding	100	2117	0.00339849
GO	pathway-restricted SMAD protein phosphorylation	3	9	0.00342864
GO	transforming growth factor beta-activated receptor activity	3	9	0.00342864
GO	retina vasculature development in camera-type eye	3	9	0.00342864
GO	volume-sensitive anion channel activity	3	9	0.00342864
GO	glutamate secretion	3	9	0.00342864
GO	regulation of glomerular filtration	3	9	0.00342864
GO	membranous septum morphogenesis	3	9	0.00342864
GO	regulation of hyaluronan biosynthetic process	3	9	0.00342864
GO	negative regulation of phospholipid metabolic process	3	9	0.00342864
GO	catecholamine transport	3	9	0.00342864
GO	actomyosin	9	84	0.00344367
GO	divalent inorganic cation homeostasis	24	361	0.00345756
GO	platelet-derived growth factor receptor signaling pathway	6	41	0.00345937
GO	heart development	16	205	0.00348159
GO	cellular divalent inorganic cation homeostasis	23	341	0.00348476
GO	regulation of cyclin-dependent protein serine/threonine kinase activity	8	69	0.00350062
GO	cellular response to oxygen-containing compound	36	615	0.00353129
GO	negative regulation of fibroblast growth factor receptor signaling pathway	4	18	0.00354959
GO	semaphorin receptor binding	4	18	0.00354959
GO	embryo development ending in birth or egg hatching	20	282	0.00356764
GO	fibronectin binding	5	29	0.0036266
GO	epithelial to mesenchymal transition	7	55	0.00365833
GO	response to corticosteroid	7	55	0.00365833
GO	cell projection membrane	18	244	0.00368299
GO	negative regulation of cell adhesion	18	244	0.00368299
GO	receptor ligand activity	20	283	0.00371249
GO	cortical cytoskeleton	9	85	0.00373041
GO	regulation of protein localization to membrane	14	170	0.00377752
GO	regulation of transporter activity	16	207	0.00382844
GO	transforming growth factor beta receptor signaling pathway	8	70	0.00382937
GO	negative regulation of cell migration	17	226	0.00385967
GO	BMP receptor complex	2	3	0.00387947
GO	endocardial cushion fusion	2	3	0.00387947
GO	growth cone lamellipodium	2	3	0.00387947
GO	negative regulation of cell adhesion molecule production	2	3	0.00387947
GO	positive regulation of anion channel activity	2	3	0.00387947
GO	regulation of dense core granule biogenesis	2	3	0.00387947
GO	negative regulation of glutamate receptor signaling pathway	2	3	0.00387947
GO	lysophosphatidic acid phosphatase activity	2	3	0.00387947
GO	calcium-independent cell-matrix adhesion	2	3	0.00387947
GO	regulation of transforming growth factor-beta secretion	2	3	0.00387947
GO	dopaminergic neuron axon guidance	2	3	0.00387947
GO	serotonergic neuron axon guidance	2	3	0.00387947
GO	cell communication by chemical coupling	2	3	0.00387947
GO	epicardial cell to mesenchymal cell transition	2	3	0.00387947
GO	morphogenesis of an epithelial bud	2	3	0.00387947
GO	integrin alpha2-beta1 complex	2	3	0.00387947
GO	dentinogenesis	2	3	0.00387947
GO	mammary gland morphogenesis	2	3	0.00387947
GO	1-alkylglycerophosphocholine O-acetyltransferase activity	2	3	0.00387947
GO	phosphatidylcholine acyl-chain remodeling	2	3	0.00387947
GO	embryonic genitalia morphogenesis	2	3	0.00387947
GO	regulation of muscle filament sliding	2	3	0.00387947
GO	positive regulation of phosphatidylcholine biosynthetic process	2	3	0.00387947
GO	positive regulation of phosphatidylcholine metabolic process	2	3	0.00387947
GO	regulation of protein autophosphorylation	6	42	0.00391415
GO	filamentous actin	6	42	0.00391415
GO	cellular calcium ion homeostasis	22	325	0.00404541
GO	kidney epithelium development	7	56	0.00405263
GO	signaling receptor activator activity	20	286	0.00417673
GO	cytosol	137	3060	0.0042156
GO	regulation of interleukin-1 beta production	5	30	0.00422373
GO	steroid binding	9	87	0.00435982
GO	response to steroid hormone	9	87	0.00435982
GO	negative regulation of response to external stimulus	21	307	0.004361
GO	regulation of postsynaptic membrane organization	4	19	0.00436825
GO	response to sterol	4	19	0.00436825
GO	response to muramyl dipeptide	4	19	0.00436825
GO	positive regulation of vascular associated smooth muscle cell migration	4	19	0.00436825
GO	regulation of synaptic transmission, glutamatergic	6	43	0.00441173
GO	cellular response to transforming growth factor beta stimulus	6	43	0.00441173
GO	endoplasmic reticulum	68	1359	0.00441694
GO	regulation of neurotransmitter levels	13	155	0.00442353
GO	protein kinase activity	32	537	0.0044551
GO	positive regulation of small GTPase mediated signal transduction	7	57	0.00447831
GO	cell body	33	559	0.00450232
GO	tissue remodeling	8	72	0.00455799
GO	extracellular matrix	23	349	0.00461959
GO	regulation of actin filament length	14	174	0.00464605
GO	leading edge membrane	11	121	0.00467595
GO	cellular homeostasis	37	648	0.00468099
GO	epithelial tube morphogenesis	9	88	0.00470407
GO	negative regulation of cell morphogenesis involved in differentiation	9	88	0.00470407
GO	actin filament network formation	3	10	0.00476637
GO	regulation of cardiac epithelial to mesenchymal transition	3	10	0.00476637
GO	collateral sprouting	3	10	0.00476637
GO	positive regulation of phospholipid biosynthetic process	3	10	0.00476637
GO	negative regulation of interleukin-1 beta production	3	10	0.00476637
GO	renal system process involved in regulation of blood volume	3	10	0.00476637
GO	voltage-gated calcium channel activity involved in regulation of cytosolic calcium levels	3	10	0.00476637
GO	voltage-gated calcium channel activity involved in regulation of presynaptic cytosolic calcium levels	3	10	0.00476637
GO	vagina development	3	10	0.00476637
GO	type I transforming growth factor beta receptor binding	3	10	0.00476637
GO	positive regulation of excitatory postsynaptic potential	5	31	0.00488781
GO	positive regulation of actin filament bundle assembly	7	58	0.00493688
GO	odontogenesis	7	58	0.00493688
GO	regulation of pri-miRNA transcription by RNA polymerase II	6	44	0.00495443
GO	regulation of cyclin-dependent protein kinase activity	8	73	0.00496001
GO	regulation of nitrogen compound metabolic process	181	4211	0.0050911
GO	cellular chemical homeostasis	32	542	0.00510246
GO	female gonad development	4	20	0.0053052
GO	cell-cell adhesion mediated by cadherin	4	20	0.0053052
GO	regulation of hair follicle development	4	20	0.0053052
GO	establishment of apical/basal cell polarity	4	20	0.0053052
GO	polarized epithelial cell differentiation	4	20	0.0053052
GO	receptor regulator activity	21	313	0.00542901
GO	positive regulation of GTPase activity	15	196	0.00549612
GO	modulation of excitatory postsynaptic potential	6	45	0.00554457
GO	substrate adhesion-dependent cell spreading	6	45	0.00554457
GO	positive regulation of cell death	36	633	0.00557194
GO	intrinsic component of synaptic membrane	11	124	0.00562033
GO	proteoglycan binding	5	32	0.00562267
GO	positive regulation of vasoconstriction	5	32	0.00562267
GO	glycosaminoglycan biosynthetic process	5	32	0.00562267
GO	protein complex involved in cell adhesion	5	32	0.00562267
GO	positive regulation of endocytosis	10	107	0.00564484
GO	regulation of embryonic development	10	107	0.00564484
GO	protein homodimerization activity	33	569	0.00585484
GO	cellular response to stimulus	106	2307	0.00595009
GO	identical protein binding	82	1717	0.00614031
GO	calcium ion homeostasis	22	337	0.00616448
GO	leukocyte cell-cell adhesion	6	46	0.00618447
GO	establishment or maintenance of apical/basal cell polarity	6	46	0.00618447
GO	establishment or maintenance of bipolar cell polarity	6	46	0.00618447
GO	reproductive structure development	16	218	0.0062797
GO	homophilic cell adhesion via plasma membrane adhesion molecules	8	76	0.00633002
GO	transforming growth factor beta binding	4	21	0.00636755
GO	heparan sulfate proteoglycan metabolic process	4	21	0.00636755
GO	regulation of vascular associated smooth muscle cell migration	4	21	0.00636755
GO	urogenital system development	3	11	0.00637788
GO	positive regulation of striated muscle contraction	3	11	0.00637788
GO	positive regulation of synaptic plasticity	3	11	0.00637788
GO	branch elongation of an epithelium	3	11	0.00637788
GO	laminin complex	3	11	0.00637788
GO	I-SMAD binding	3	11	0.00637788
GO	negative regulation of pathway-restricted SMAD protein phosphorylation	3	11	0.00637788
GO	semaphorin-plexin signaling pathway involved in axon guidance	3	11	0.00637788
GO	regulation of gamma-delta T cell activation	3	11	0.00637788
GO	regulation of gamma-delta T cell differentiation	3	11	0.00637788
GO	filamin binding	3	11	0.00637788
GO	chondroitin sulfate biosynthetic process	3	11	0.00637788
GO	embryonic camera-type eye development	3	11	0.00637788
GO	muscle contraction	10	109	0.00642319
GO	ventricular septum morphogenesis	5	33	0.00643212
GO	collagen binding	7	61	0.00652541
GO	regulation of ossification	14	181	0.00655007
GO	ion transport	46	867	0.00671699
GO	neural tube closure	9	93	0.00675332
GO	apical part of cell	10	110	0.00684238
GO	gonad development	8	77	0.00684505
GO	protein-containing complex binding	63	1266	0.00684781
GO	positive regulation of neural precursor cell proliferation	6	47	0.00687645
GO	regulation of canonical Wnt signaling pathway	15	201	0.00689678
GO	plasma membrane signaling receptor complex	11	128	0.00710635
GO	developmental process involved in reproduction	38	688	0.00712602
GO	regulation of cardiac muscle tissue growth	7	62	0.00713105
GO	forebrain development	7	62	0.00713105
GO	regulation of actin filament-based movement	5	34	0.00731988
GO	placenta blood vessel development	5	34	0.00731988
GO	regulation of epithelial to mesenchymal transition	8	78	0.00739113
GO	transcription factor complex	15	203	0.00753148
GO	presynapse	15	203	0.00753148
GO	neuron cellular homeostasis	4	22	0.00756207
GO	mesenchyme morphogenesis	4	22	0.00756207
GO	positive regulation of mast cell activation	4	22	0.00756207
GO	axonal fasciculation	4	22	0.00756207
GO	neuron projection fasciculation	4	22	0.00756207
GO	R-SMAD binding	4	22	0.00756207
GO	establishment of monopolar cell polarity	4	22	0.00756207
GO	activin receptor activity, type I	2	4	0.00757168
GO	atrial septum primum morphogenesis	2	4	0.00757168
GO	cell adhesion involved in heart morphogenesis	2	4	0.00757168
GO	volume-sensitive chloride channel activity	2	4	0.00757168
GO	cerebrospinal fluid secretion	2	4	0.00757168
GO	myosin light chain binding	2	4	0.00757168
GO	negative regulation of peroxisome proliferator activated receptor signaling pathway	2	4	0.00757168
GO	positive regulation of aorta morphogenesis	2	4	0.00757168
GO	regulation of aorta morphogenesis	2	4	0.00757168
GO	trans-synaptic signaling by endocannabinoid	2	4	0.00757168
GO	trans-synaptic signaling by lipid	2	4	0.00757168
GO	extracellular matrix constituent secretion	2	4	0.00757168
GO	mercury ion binding	2	4	0.00757168
GO	transcription factor AP-1 complex	2	4	0.00757168
GO	non-canonical Wnt signaling pathway via JNK cascade	2	4	0.00757168
GO	positive regulation of glomerular filtration	2	4	0.00757168
GO	positive regulation of smooth muscle cell chemotaxis	2	4	0.00757168
GO	response to interleukin-18	2	4	0.00757168
GO	collagen binding involved in cell-matrix adhesion	2	4	0.00757168
GO	positive regulation of neurotransmitter uptake	2	4	0.00757168
GO	catenin-TCF7L2 complex	2	4	0.00757168
GO	laminin-5 complex	2	4	0.00757168
GO	negative regulation of SMAD protein complex assembly	2	4	0.00757168
GO	amygdala development	2	4	0.00757168
GO	trigeminal nerve structural organization	2	4	0.00757168
GO	cardiac chamber formation	2	4	0.00757168
GO	cardiac ventricle formation	2	4	0.00757168
GO	muscle filament sliding	2	4	0.00757168
GO	choline transmembrane transporter activity	2	4	0.00757168
GO	regulation of pathway-restricted SMAD protein phosphorylation	6	48	0.00762281
GO	export from cell	21	323	0.00768342
GO	regulation of receptor-mediated endocytosis	9	95	0.00774171
GO	negative regulation of ossification	7	63	0.00777736
GO	regulation of striated muscle tissue development	11	130	0.00795612
GO	tube closure	9	96	0.00827545
GO	collagen-activated signaling pathway	3	12	0.00827608
GO	retinal metabolic process	3	12	0.00827608
GO	renal system process involved in regulation of systemic arterial blood pressure	3	12	0.00827608
GO	planar cell polarity pathway involved in neural tube closure	3	12	0.00827608
GO	positive regulation of keratinocyte migration	3	12	0.00827608
GO	cellular response to cholesterol	3	12	0.00827608
GO	semaphorin-plexin signaling pathway involved in neuron projection guidance	3	12	0.00827608
GO	npBAF complex	3	12	0.00827608
GO	cell-substrate junction assembly	5	35	0.0082896
GO	cell-substrate junction organization	5	35	0.0082896
GO	regulation of heart morphogenesis	5	35	0.0082896
GO	detection of mechanical stimulus	6	49	0.00842583
GO	negative regulation of chemotaxis	6	49	0.00842583
GO	regulation of protein localization	46	879	0.00853424
GO	epithelial cell proliferation	8	80	0.00858096
GO	regulation of JUN kinase activity	8	80	0.00858096
GO	regulation of macromolecule metabolic process	194	4606	0.00867096
GO	enzyme activator activity	25	411	0.00876835
GO	postsynaptic membrane	11	132	0.00888283
GO	basement membrane organization	4	23	0.00889508
GO	establishment or maintenance of monopolar cell polarity	4	23	0.00889508
GO	chemorepellent activity	4	23	0.00889508
GO	cellular response to endogenous stimulus	29	498	0.0089479
GO	regulation of cardiac muscle tissue development	8	81	0.00922698
GO	positive regulation of cold-induced thermogenesis	8	81	0.00922698
GO	Golgi apparatus	58	1165	0.00925225
GO	regulation of chondrocyte differentiation	5	36	0.00934481
GO	cellular response to retinoic acid	5	36	0.00934481
GO	establishment of spindle orientation	5	36	0.00934481
GO	regulation of cardiac muscle cell proliferation	5	36	0.00934481
GO	regulation of muscle organ development	11	133	0.00937642
GO	regulation of muscle tissue development	11	133	0.00937642
GO	cell morphogenesis involved in differentiation	11	133	0.00937642
GO	regulation of DNA-binding transcription factor activity	22	350	0.00941516
GO	perikaryon	9	98	0.00942634
GO	positive regulation of calcium ion transport	9	98	0.00942634
GO	regulation of plasma membrane bounded cell projection assembly	13	170	0.00943406
GO	transporter activity	42	793	0.00965215
GO	hormone metabolic process	10	116	0.00981994
GO	regulation of GTPase activity	18	269	0.00986297
GO	axon terminus	8	82	0.00990858
GO	mesenchymal cell differentiation	7	66	0.0099758
GO	negative regulation of cell proliferation	21	331	0.0099916
GO	response to transforming growth factor beta	6	51	0.0102108
GO	positive regulation of receptor-mediated endocytosis	6	51	0.0102108
GO	regulation of cardiac muscle contraction	6	51	0.0102108
GO	regulation of endocytosis	14	191	0.0102999
GO	regulation of actin polymerization or depolymerization	13	172	0.0103479
GO	regulation of cell projection assembly	13	172	0.0103479
GO	hair follicle morphogenesis	4	24	0.0103725
GO	extracellular matrix assembly	4	24	0.0103725
GO	cell adhesion mediated by integrin	4	24	0.0103725
GO	negative regulation of endothelial cell apoptotic process	4	24	0.0103725
GO	blood vessel development	11	135	0.0104268
GO	transmembrane receptor protein serine/threonine kinase activity	3	13	0.0104713
GO	secretion by tissue	3	13	0.0104713
GO	negative regulation of stem cell proliferation	3	13	0.0104713
GO	somatic stem cell division	3	13	0.0104713
GO	regulation of postsynaptic density organization	3	13	0.0104713
GO	vocalization behavior	3	13	0.0104713
GO	cartilage condensation	3	13	0.0104713
GO	female genitalia development	3	13	0.0104713
GO	regulation of keratinocyte migration	3	13	0.0104713
GO	9+0 non-motile cilium	3	13	0.0104713
GO	positive regulation of phospholipid metabolic process	5	37	0.010489
GO	heterophilic cell-cell adhesion via plasma membrane cell adhesion molecules	5	37	0.010489
GO	somatic stem cell population maintenance	5	37	0.010489
GO	regulation of establishment of planar polarity	5	37	0.010489
GO	positive regulation of protein catabolic process	15	211	0.0105512
GO	regulation of protein depolymerization	8	83	0.0106269
GO	negative regulation of intracellular signal transduction	27	461	0.0106337
GO	neuron projection terminus	9	100	0.0106942
GO	response to drug	12	154	0.0107402
GO	regulation of bone mineralization	7	67	0.0108003
GO	regulation of protein tyrosine kinase activity	7	67	0.0108003
GO	long-chain fatty acid metabolic process	7	67	0.0108003
GO	secretion	23	376	0.010933
GO	transmembrane transporter activity	38	708	0.0110453
GO	positive regulation of Ras protein signal transduction	6	52	0.0111972
GO	dendritic shaft	6	52	0.0111972
GO	regulation of response to wounding	12	155	0.0112703
GO	response to alcohol	9	101	0.0113742
GO	negative regulation of BMP signaling pathway	5	38	0.0117253
GO	ion transmembrane transporter activity	33	598	0.0118284
GO	regulation of lipid metabolic process	19	295	0.0119477
GO	secretion by cell	19	295	0.0119477
GO	positive regulation of transport	43	827	0.0119805
GO	cardiac ventricle morphogenesis	4	25	0.0119998
GO	positive regulation of cell adhesion	22	358	0.0120267
GO	regulation of axon extension	9	102	0.012086
GO	tube formation	11	138	0.012169
GO	stress-activated protein kinase signaling cascade	8	85	0.0121781
GO	response to glucocorticoid	6	53	0.012249
GO	response to toxic substance	6	53	0.012249
GO	asymmetric stem cell division	2	5	0.0123159
GO	platelet dense granule organization	2	5	0.0123159
GO	positive regulation of epithelial to mesenchymal transition involved in endocardial cushion formation	2	5	0.0123159
GO	transforming growth factor beta receptor activity, type I	2	5	0.0123159
GO	positive regulation of tau-protein kinase activity	2	5	0.0123159
GO	regulation of phosphatidylinositol biosynthetic process	2	5	0.0123159
GO	negative regulation of synaptic transmission, GABAergic	2	5	0.0123159
GO	positive regulation of long-term neuronal synaptic plasticity	2	5	0.0123159
GO	cellular response to indole-3-methanol	2	5	0.0123159
GO	response to indole-3-methanol	2	5	0.0123159
GO	negative regulation of amyloid fibril formation	2	5	0.0123159
GO	protein localization to juxtaparanode region of axon	2	5	0.0123159
GO	neural crest cell migration involved in autonomic nervous system development	2	5	0.0123159
GO	regulation of mitotic cell cycle, embryonic	2	5	0.0123159
GO	non-canonical Wnt signaling pathway via MAPK cascade	2	5	0.0123159
GO	cell communication by electrical coupling	2	5	0.0123159
GO	regulation of ventricular cardiac muscle cell membrane depolarization	2	5	0.0123159
GO	positive regulation of hyaluronan biosynthetic process	2	5	0.0123159
GO	interleukin-18-mediated signaling pathway	2	5	0.0123159
GO	cell-matrix adhesion mediator activity	2	5	0.0123159
GO	CD40 signaling pathway	2	5	0.0123159
GO	regulation of SMAD protein complex assembly	2	5	0.0123159
GO	regulation of chondrocyte development	2	5	0.0123159
GO	dopamine catabolic process	2	5	0.0123159
GO	negative regulation of phospholipid biosynthetic process	2	5	0.0123159
GO	paracrine signaling	2	5	0.0123159
GO	branchiomotor neuron axon guidance	2	5	0.0123159
GO	negative regulation of lipoprotein lipase activity	2	5	0.0123159
GO	regulation of oxidative phosphorylation uncoupler activity	2	5	0.0123159
GO	actin-myosin filament sliding	2	5	0.0123159
GO	cellular response to toxic substance	2	5	0.0123159
GO	chondroitin sulfotransferase activity	2	5	0.0123159
GO	N-acetylglucosamine 6-O-sulfotransferase activity	2	5	0.0123159
GO	steroid hormone binding	2	5	0.0123159
GO	cellular hormone metabolic process	7	69	0.0125958
GO	Rho guanyl-nucleotide exchange factor activity	7	69	0.0125958
GO	perinuclear region of cytoplasm	32	579	0.0127962
GO	regulation of tumor necrosis factor production	11	139	0.0127964
GO	negative regulation of canonical Wnt signaling pathway	9	103	0.0128305
GO	small GTPase binding	24	403	0.0128365
GO	positive regulation of epithelial cell proliferation	13	177	0.0129348
GO	cell aggregation	3	14	0.0129715
GO	regulation of establishment of planar polarity involved in neural tube closure	3	14	0.0129715
GO	regulation of neurotransmitter uptake	3	14	0.0129715
GO	presynaptic modulation of chemical synaptic transmission	3	14	0.0129715
GO	leukocyte aggregation	3	14	0.0129715
GO	platelet-derived growth factor receptor binding	3	14	0.0129715
GO	nBAF complex	3	14	0.0129715
GO	negative regulation of phosphatidylinositol 3-kinase signaling	3	14	0.0129715
GO	regulation of wound healing	10	121	0.0129817
GO	actin filament	8	86	0.0130132
GO	positive regulation of tumor necrosis factor production	8	86	0.0130132
GO	regulation of response to external stimulus	38	716	0.0130454
GO	regulation of cell adhesion mediated by integrin	5	39	0.0130572
GO	establishment or maintenance of epithelial cell apical/basal polarity	5	39	0.0130572
GO	striated muscle contraction	6	54	0.0133684
GO	positive regulation of chemokine production	6	54	0.0133684
GO	muscle tissue morphogenesis	6	54	0.0133684
GO	protein autophosphorylation	13	178	0.0135073
GO	negative regulation of transport	24	405	0.0135655
GO	import into cell	9	104	0.0136085
GO	cellular response to lipoprotein particle stimulus	4	26	0.013782
GO	acidic amino acid transport	4	26	0.013782
GO	platelet activation	4	26	0.013782
GO	positive regulation of tumor necrosis factor superfamily cytokine production	8	87	0.0138895
GO	RNA polymerase II transcription regulatory region sequence-specific DNA binding	8	87	0.0138895
GO	cell-cell junction assembly	8	87	0.0138895
GO	GTPase activator activity	15	218	0.0139107
GO	regulation of protein-containing complex assembly	19	300	0.0140669
GO	regulation of tumor necrosis factor superfamily cytokine production	11	141	0.0141244
GO	regulation of ion transport	29	517	0.0143907
GO	regulation of cell-matrix adhesion	9	105	0.014421
GO	regulation of vesicle-mediated transport	28	495	0.0144592
GO	positive regulation of stem cell proliferation	5	40	0.0144875
GO	amino sugar metabolic process	5	40	0.0144875
GO	hormone binding	6	55	0.0145574
GO	negative regulation of transforming growth factor beta receptor signaling pathway	6	55	0.0145574
GO	structural constituent of synapse	4	27	0.0157237
GO	cardiac chamber morphogenesis	4	27	0.0157237
GO	intrinsic component of postsynaptic membrane	8	89	0.0157699
GO	protein kinase C-activating G protein-coupled receptor signaling pathway	3	15	0.0157827
GO	positive regulation of membrane protein ectodomain proteolysis	3	15	0.0157827
GO	myelin maintenance	3	15	0.0157827
GO	positive regulation of mast cell activation involved in immune response	3	15	0.0157827
GO	positive regulation of mast cell degranulation	3	15	0.0157827
GO	cellular response to sterol	3	15	0.0157827
GO	negative regulation of epidermis development	3	15	0.0157827
GO	positive regulation of alpha-beta T cell proliferation	3	15	0.0157827
GO	osteoblast differentiation	6	56	0.015818
GO	negative regulation of cellular response to transforming growth factor beta stimulus	6	56	0.015818
GO	regulation of lipid kinase activity	5	41	0.0160191
GO	odontogenesis of dentin-containing tooth	5	41	0.0160191
GO	negative regulation of epithelial cell apoptotic process	5	41	0.0160191
GO	axonogenesis	9	107	0.0161525
GO	glycosaminoglycan binding	12	163	0.016268
GO	positive regulation of hydrolase activity	26	456	0.016443
GO	negative regulation of protein-containing complex assembly	8	90	0.0167762
GO	cell recognition	8	90	0.0167762
GO	caveola	7	73	0.0168145
GO	bone development	6	57	0.0171521
GO	axis specification	6	57	0.0171521
GO	regulation of hydrolase activity	42	823	0.0172151
GO	ion transmembrane transport	24	414	0.0172659
GO	regulation of cellular component size	17	265	0.0174245
GO	vasculature development	5	42	0.017655
GO	dicarboxylic acid transport	5	42	0.017655
GO	aminoglycan biosynthetic process	5	42	0.017655
GO	negative regulation of axon extension	5	42	0.017655
GO	positive regulation of protein localization to membrane	8	91	0.0178279
GO	regulation of vascular endothelial growth factor production	4	28	0.0178289
GO	positive regulation of release of sequestered calcium ion into cytosol	4	28	0.0178289
GO	cartilage development	7	74	0.0180083
GO	acetylcholine-gated cation-selective channel activity	2	6	0.0180307
GO	positive regulation of hepatic stellate cell activation	2	6	0.0180307
GO	endocardial cushion to mesenchymal transition	2	6	0.0180307
GO	L-type voltage-gated calcium channel complex	2	6	0.0180307
GO	positive regulation of peptidyl-tyrosine autophosphorylation	2	6	0.0180307
GO	hematopoietic stem cell migration	2	6	0.0180307
GO	positive regulation of retinoic acid receptor signaling pathway	2	6	0.0180307
GO	cerebellar mossy fiber	2	6	0.0180307
GO	transmembrane-ephrin receptor activity	2	6	0.0180307
GO	trans-synaptic signaling by trans-synaptic complex	2	6	0.0180307
GO	autocrine signaling	2	6	0.0180307
GO	muscular septum morphogenesis	2	6	0.0180307
GO	planar cell polarity pathway involved in axon guidance	2	6	0.0180307
GO	sympathetic ganglion development	2	6	0.0180307
GO	regulation of smooth muscle cell chemotaxis	2	6	0.0180307
GO	activin receptor binding	2	6	0.0180307
GO	catecholamine catabolic process	2	6	0.0180307
GO	catechol-containing compound catabolic process	2	6	0.0180307
GO	cardiac vascular smooth muscle cell differentiation	2	6	0.0180307
GO	axon extension involved in axon guidance	2	6	0.0180307
GO	neuron projection extension involved in neuron projection guidance	2	6	0.0180307
GO	monoamine transmembrane transporter activity	2	6	0.0180307
GO	1-acylglycerophosphocholine O-acyltransferase activity	2	6	0.0180307
GO	O-acetyltransferase activity	2	6	0.0180307
GO	potassium-transporting ATPase activity	2	6	0.0180307
GO	nose development	2	6	0.0180307
GO	choline transport	2	6	0.0180307
GO	regulation of transmembrane transport	24	416	0.0181875
GO	regulation of ion transmembrane transport	20	330	0.0184715
GO	positive regulation of calcium ion transmembrane transport	6	58	0.0185615
GO	cellular response to alcohol	6	58	0.0185615
GO	positive regulation of lipid metabolic process	10	128	0.0186202
GO	negative regulation of chondrocyte differentiation	3	16	0.0189086
GO	heparan sulfate proteoglycan binding	3	16	0.0189086
GO	regulation of presynapse assembly	3	16	0.0189086
GO	glial cell proliferation	3	16	0.0189086
GO	negative regulation of viral release from host cell	3	16	0.0189086
GO	positive regulation of apoptotic process	31	575	0.0193497
GO	axonal growth cone	5	43	0.0193975
GO	establishment of spindle localization	5	43	0.0193975
GO	positive regulation of axonogenesis	8	93	0.0200717
GO	cation transport	30	554	0.0200733
GO	positive regulation of heart contraction	4	29	0.0201012
GO	laminin binding	4	29	0.0201012
GO	central nervous system neuron axonogenesis	4	29	0.0201012
GO	regulation of hair cycle	4	29	0.0201012
GO	integrin complex	4	29	0.0201012
GO	alpha-actinin binding	4	29	0.0201012
GO	lymphocyte activation	18	291	0.0204926
GO	negative regulation of secretion by cell	11	149	0.0204966
GO	endocytosis	17	270	0.0205066
GO	regulation of epithelial cell proliferation	19	313	0.0209744
GO	positive regulation of cytokine production	19	313	0.0209744
GO	positive regulation of cell growth	12	169	0.0209982
GO	regulation of cytokine production	28	511	0.0210723
GO	positive regulation of programmed cell death	31	579	0.0210795
GO	integral component of synaptic membrane	9	112	0.021142
GO	response to mechanical stimulus	9	112	0.021142
GO	regulation of long-term synaptic potentiation	5	44	0.0212492
GO	negative regulation of muscle cell differentiation	5	44	0.0212492
GO	neuron projection membrane	5	44	0.0212492
GO	regulation of endothelial cell apoptotic process	5	44	0.0212492
GO	activation of MAPK activity	8	94	0.0212659
GO	regulation of lipid biosynthetic process	11	150	0.0214215
GO	anterograde trans-synaptic signaling	10	131	0.0215201
GO	chemical synaptic transmission	10	131	0.0215201
GO	positive regulation of nervous system process	6	60	0.0216136
GO	regulation of striated muscle contraction	6	60	0.0216136
GO	cell development	30	558	0.0218924
GO	response to organophosphorus	7	77	0.0219449
GO	regulation of epithelial cell apoptotic process	7	77	0.0219449
GO	regulation of cellular localization	45	908	0.0220892
GO	regulation of postsynapse organization	9	113	0.0222595
GO	detection of mechanical stimulus involved in sensory perception of pain	3	17	0.0223515
GO	dense core granule	3	17	0.0223515
GO	positive regulation of calcium ion import	3	17	0.0223515
GO	response to cocaine	3	17	0.0223515
GO	central nervous system projection neuron axonogenesis	3	17	0.0223515
GO	regulation of endothelial cell chemotaxis	3	17	0.0223515
GO	regulation of epithelial tube formation	3	17	0.0223515
GO	natural killer cell differentiation	3	17	0.0223515
GO	mature B cell differentiation involved in immune response	3	17	0.0223515
GO	actin-mediated cell contraction	3	17	0.0223515
GO	postsynaptic actin cytoskeleton organization	3	17	0.0223515
GO	postsynaptic cytoskeleton organization	3	17	0.0223515
GO	phosphatidylinositol phospholipase C activity	3	17	0.0223515
GO	phospholipase C activity	3	17	0.0223515
GO	muscle alpha-actinin binding	3	17	0.0223515
GO	behavior	26	469	0.0225272
GO	membrane lipid catabolic process	4	30	0.0225439
GO	response to axon injury	4	30	0.0225439
GO	lymphocyte differentiation	12	171	0.0227817
GO	Golgi membrane	13	191	0.0228481
GO	mucopolysaccharide metabolic process	5	45	0.0232122
GO	regulation of filopodium assembly	5	45	0.0232122
GO	secretory granule membrane	6	61	0.0232596
GO	regulation of biomineral tissue development	7	78	0.0233798
GO	regulation of biomineralization	7	78	0.0233798
GO	cytosolic calcium ion transport	7	78	0.0233798
GO	positive regulation of exocytosis	7	78	0.0233798
GO	tight junction	9	114	0.0234188
GO	early endosome	14	212	0.0234874
GO	signal release	10	133	0.0236274
GO	positive regulation of ion transmembrane transport	10	133	0.0236274
GO	positive regulation of cell morphogenesis involved in differentiation	12	172	0.0237142
GO	growth factor activity	8	96	0.0238035
GO	phosphotransferase activity, alcohol group as acceptor	33	631	0.0238995
GO	collagen-containing extracellular matrix	17	275	0.0239894
GO	response to growth factor	14	213	0.0243351
GO	learning or memory	14	213	0.0243351
GO	sphingomyelin phosphodiesterase activity	2	7	0.0246394
GO	maintenance of postsynaptic specialization structure	2	7	0.0246394
GO	response to laminar fluid shear stress	2	7	0.0246394
GO	acetylcholine-gated channel complex	2	7	0.0246394
GO	postsynaptic membrane organization	2	7	0.0246394
GO	regulation of epithelial to mesenchymal transition involved in endocardial cushion formation	2	7	0.0246394
GO	endothelial cell activation	2	7	0.0246394
GO	negative regulation of neuroblast proliferation	2	7	0.0246394
GO	retrograde trans-synaptic signaling	2	7	0.0246394
GO	regulation of peptidyl-tyrosine autophosphorylation	2	7	0.0246394
GO	sulfur amino acid catabolic process	2	7	0.0246394
GO	macrophage proliferation	2	7	0.0246394
GO	microglial cell proliferation	2	7	0.0246394
GO	regulation of vascular wound healing	2	7	0.0246394
GO	positive regulation of artery morphogenesis	2	7	0.0246394
GO	regulation of blood vessel remodeling	2	7	0.0246394
GO	regulation of gonadotropin secretion	2	7	0.0246394
GO	serotonin binding	2	7	0.0246394
GO	observational learning	2	7	0.0246394
GO	positive regulation of glomerular mesangial cell proliferation	2	7	0.0246394
GO	nucleotide-binding oligomerization domain containing 2 signaling pathway	2	7	0.0246394
GO	nucleotide-binding oligomerization domain containing signaling pathway	2	7	0.0246394
GO	syndecan binding	2	7	0.0246394
GO	intraciliary transport involved in cilium assembly	2	7	0.0246394
GO	trachea formation	2	7	0.0246394
GO	negative regulation of bone development	2	7	0.0246394
GO	hydrolase activity, acting on carbon-nitrogen (but not peptide) bonds, in cyclic amides	2	7	0.0246394
GO	decanoate-CoA ligase activity	2	7	0.0246394
GO	phosphoric diester hydrolase activity	7	79	0.024878
GO	GTPase binding	27	496	0.0249758
GO	positive regulation of plasma membrane bounded cell projection assembly	8	97	0.0251488
GO	B cell receptor signaling pathway	4	31	0.0251596
GO	T cell differentiation in thymus	4	31	0.0251596
GO	voltage-gated calcium channel activity	4	31	0.0251596
GO	regulation of gastrulation	4	31	0.0251596
GO	anchored component of plasma membrane	5	46	0.0252888
GO	brain development	10	135	0.0258798
GO	estrogen metabolic process	3	18	0.0261119
GO	endothelial cell differentiation	3	18	0.0261119
GO	dendrite terminus	3	18	0.0261119
GO	dendritic spine development	3	18	0.0261119
GO	coreceptor activity	3	18	0.0261119
GO	reflex	3	18	0.0261119
GO	positive chemotaxis	3	18	0.0261119
GO	neurotransmitter metabolic process	3	18	0.0261119
GO	regulation of bone development	3	18	0.0261119
GO	SWI/SNF complex	3	18	0.0261119
GO	hippo signaling	3	18	0.0261119
GO	GTPase activating protein binding	3	18	0.0261119
GO	organic cation transmembrane transporter activity	3	18	0.0261119
GO	regulation of smooth muscle cell differentiation	3	18	0.0261119
GO	GTPase regulator activity	15	236	0.0263644
GO	integral component of postsynaptic membrane	7	80	0.0264407
GO	positive regulation of animal organ morphogenesis	7	80	0.0264407
GO	epithelium development	11	155	0.0265108
GO	cellular response to growth factor stimulus	13	195	0.0265123
GO	skeletal system morphogenesis	8	98	0.0265464
GO	response to inorganic substance	20	343	0.026581
GO	calcium ion transport into cytosol	6	63	0.0267993
GO	response to molecule of bacterial origin	14	216	0.027015
GO	Ras GTPase binding	22	388	0.0273382
GO	localization	140	3318	0.0274749
GO	heart looping	5	47	0.0274807
GO	positive regulation of developmental growth	12	176	0.0277266
GO	pattern specification process	17	280	0.0279023
GO	ovulation cycle process	4	32	0.0279506
GO	disordered domain specific binding	4	32	0.0279506
GO	regulation of polysaccharide biosynthetic process	4	32	0.0279506
GO	organic cation transport	4	32	0.0279506
GO	positive regulation of reactive oxygen species metabolic process	8	99	0.027997
GO	cytoplasmic region	7	81	0.028069
GO	growth factor receptor binding	9	118	0.0284876
GO	regulation of nervous system process	9	118	0.0284876
GO	gland development	13	197	0.0284983
GO	chemical homeostasis	42	852	0.0285193
GO	nervous system process	31	594	0.0286783
GO	Rac GTPase binding	6	64	0.0286958
GO	smoothened signaling pathway	6	64	0.0286958
GO	glutamatergic synapse	22	390	0.0287318
GO	response to metal ion	14	218	0.0289188
GO	muscle system process	10	138	0.029541
GO	protein dimerization activity	39	783	0.0296163
GO	beta-catenin binding	7	82	0.029764
GO	neuromuscular process controlling balance	5	48	0.0297898
GO	regulation of neuronal synaptic plasticity	5	48	0.0297898
GO	spindle localization	5	48	0.0297898
GO	regulation of heart contraction	9	119	0.0298663
GO	tube development	11	158	0.0299547
GO	neurotransmitter binding	3	19	0.0301888
GO	response to nicotine	3	19	0.0301888
GO	skeletal muscle contraction	3	19	0.0301888
GO	regulation of presynapse organization	3	19	0.0301888
GO	regulation of receptor binding	3	19	0.0301888
GO	fluid transport	3	19	0.0301888
GO	cytokine production involved in immune response	3	19	0.0301888
GO	epithelial tube branching involved in lung morphogenesis	3	19	0.0301888
GO	dendritic spine morphogenesis	3	19	0.0301888
GO	regulation of hepatocyte proliferation	3	19	0.0301888
GO	establishment or maintenance of cytoskeleton polarity	3	19	0.0301888
GO	response to lipopolysaccharide	13	199	0.0305908
GO	detection of stimulus	10	139	0.0308391
GO	regulation of phosphatidylinositol 3-kinase activity	4	33	0.0309187
GO	protein tyrosine/serine/threonine phosphatase activity	4	33	0.0309187
GO	anion transmembrane transporter activity	15	241	0.0309703
GO	calcium channel activity	7	83	0.0315266
GO	regulation of protein catabolic process	21	372	0.0318609
GO	acetylcholine binding	2	8	0.0320695
GO	acetylcholine receptor activity	2	8	0.0320695
GO	regulation of hepatic stellate cell activation	2	8	0.0320695
GO	positive regulation of receptor binding	2	8	0.0320695
GO	regulation of cell adhesion molecule production	2	8	0.0320695
GO	inhibitory postsynaptic potential	2	8	0.0320695
GO	morphogenesis of a polarized epithelium	2	8	0.0320695
GO	regulation of aldosterone biosynthetic process	2	8	0.0320695
GO	regulation of aldosterone metabolic process	2	8	0.0320695
GO	germ cell migration	2	8	0.0320695
GO	regulation of artery morphogenesis	2	8	0.0320695
GO	integrin activation	2	8	0.0320695
GO	heart field specification	2	8	0.0320695
GO	secondary heart field specification	2	8	0.0320695
GO	common bile duct development	2	8	0.0320695
GO	forebrain morphogenesis	2	8	0.0320695
GO	regulation of T-helper 1 cell differentiation	2	8	0.0320695
GO	myelin sheath abaxonal region	2	8	0.0320695
GO	myosin II binding	2	8	0.0320695
GO	positive regulation of interleukin-12 biosynthetic process	2	8	0.0320695
GO	O-glycan processing	2	8	0.0320695
GO	superoxide-generating NADPH oxidase activator activity	2	8	0.0320695
GO	regulation of osteoclast development	2	8	0.0320695
GO	positive regulation of cell proliferation involved in kidney development	2	8	0.0320695
GO	semaphorin receptor complex	2	8	0.0320695
GO	nucleotide-binding domain, leucine rich repeat containing receptor signaling pathway	2	8	0.0320695
GO	nerve growth factor binding	2	8	0.0320695
GO	positive regulation of gamma-delta T cell activation	2	8	0.0320695
GO	positive regulation of gamma-delta T cell differentiation	2	8	0.0320695
GO	sodium:potassium-exchanging ATPase complex	2	8	0.0320695
GO	protein localization to ciliary transition zone	2	8	0.0320695
GO	neurotransmitter biosynthetic process	2	8	0.0320695
GO	positive regulation of smooth muscle cell differentiation	2	8	0.0320695
GO	medium-chain fatty acid-CoA ligase activity	2	8	0.0320695
GO	formation of primary germ layer	5	49	0.0322175
GO	regulation of actin filament depolymerization	5	49	0.0322175
GO	regulation of lymphocyte migration	5	49	0.0322175
GO	T-tubule	5	49	0.0322175
GO	negative regulation of fat cell differentiation	5	49	0.0322175
GO	positive regulation of stress fiber assembly	5	49	0.0322175
GO	neuron migration	8	102	0.0326759
GO	myeloid leukocyte activation	8	102	0.0326759
GO	glycosaminoglycan metabolic process	6	66	0.0327489
GO	negative regulation of ion transport	9	121	0.0327623
GO	regulation of interleukin-6 production	7	84	0.0333579
GO	regulation of transcription by RNA polymerase II	69	1524	0.0338181
GO	cardiac muscle contraction	4	34	0.0340652
GO	negative chemotaxis	4	34	0.0340652
GO	chemotaxis	14	223	0.0341068
GO	Ras guanyl-nucleotide exchange factor activity	9	122	0.0342808
GO	multicellular organism growth	8	103	0.0343471
GO	hematopoietic progenitor cell differentiation	8	103	0.0343471
GO	regulation of smooth muscle cell proliferation	8	103	0.0343471
GO	positive regulation of fibroblast migration	3	20	0.0345801
GO	intracellular calcium activated chloride channel activity	3	20	0.0345801
GO	intracellular chloride channel activity	3	20	0.0345801
GO	mating behavior	3	20	0.0345801
GO	positive regulation of mononuclear cell migration	3	20	0.0345801
GO	regulation of membrane protein ectodomain proteolysis	3	20	0.0345801
GO	negative regulation of calcium ion transmembrane transporter activity	3	20	0.0345801
GO	benzene-containing compound metabolic process	3	20	0.0345801
GO	cornified envelope	3	20	0.0345801
GO	chondroitin sulfate metabolic process	3	20	0.0345801
GO	regulation of cardiac muscle cell apoptotic process	5	50	0.0347653
GO	intrinsic component of postsynaptic specialization membrane	5	50	0.0347653
GO	positive regulation of epithelial cell differentiation	5	50	0.0347653
GO	roof of mouth development	6	67	0.0349078
GO	negative regulation of protein depolymerization	6	67	0.0349078
GO	leukocyte differentiation	15	245	0.0350602
GO	regulation of calcium ion transport	13	203	0.0351067
GO	negative regulation of extrinsic apoptotic signaling pathway	7	85	0.0352586
GO	aminoglycan metabolic process	7	85	0.0352586
GO	apical plasma membrane	16	267	0.0357145
GO	regulation of peptide secretion	20	355	0.0362376
GO	transcription regulatory region DNA binding	13	204	0.0363065
GO	regulation of membrane potential	18	311	0.036321
GO	structural constituent of presynapse	1	1	0.0364347
GO	structural constituent of presynaptic actin cytoskeleton	1	1	0.0364347
GO	positive regulation of 1-phosphatidylinositol-4-phosphate 5-kinase activity	1	1	0.0364347
GO	regulation of 1-phosphatidylinositol-4-phosphate 5-kinase activity	1	1	0.0364347
GO	sphingolipid-translocating ATPase activity	1	1	0.0364347
GO	positive regulation of hepatic stellate cell contraction	1	1	0.0364347
GO	regulation of hepatic stellate cell contraction	1	1	0.0364347
GO	endocardial cell fate commitment	1	1	0.0364347
GO	endocardial cushion cell fate commitment	1	1	0.0364347
GO	negative regulation of acute inflammatory response to non-antigenic stimulus	1	1	0.0364347
GO	pituitary adenylate cyclase activating polypeptide activity	1	1	0.0364347
GO	pituitary adenylate cyclase-activating polypeptide receptor binding	1	1	0.0364347
GO	regulation of acute inflammatory response to non-antigenic stimulus	1	1	0.0364347
GO	inorganic diphosphate transmembrane transporter activity	1	1	0.0364347
GO	positive regulation of 1-phosphatidylinositol-3-kinase activity	1	1	0.0364347
GO	positive regulation of cellular response to thapsigargin	1	1	0.0364347
GO	positive regulation of cellular response to tunicamycin	1	1	0.0364347
GO	regulation of 1-phosphatidylinositol-3-kinase activity	1	1	0.0364347
GO	regulation of response to calcium ion	1	1	0.0364347
GO	argininosuccinate synthase activity	1	1	0.0364347
GO	retrograde trans-synaptic signaling by neuropeptide, modulating synaptic transmission	1	1	0.0364347
GO	retrograde trans-synaptic signaling by neuropeptide	1	1	0.0364347
GO	negative regulation of detection of mechanical stimulus involved in sensory perception of touch	1	1	0.0364347
GO	regulation of detection of mechanical stimulus involved in sensory perception of touch	1	1	0.0364347
GO	epithelial cell differentiation involved in salivary gland development	1	1	0.0364347
GO	cysteine dioxygenase activity	1	1	0.0364347
GO	intracellularly ATP-gated chloride channel activity	1	1	0.0364347
GO	intracellularly ATP-gated ion channel activity	1	1	0.0364347
GO	negative regulation of type B pancreatic cell development	1	1	0.0364347
GO	positive regulation of cyclic nucleotide-gated ion channel activity	1	1	0.0364347
GO	positive regulation of inorganic anion transmembrane transport	1	1	0.0364347
GO	positive regulation of voltage-gated chloride channel activity	1	1	0.0364347
GO	regulation of voltage-gated chloride channel activity	1	1	0.0364347
GO	Sec61 translocon complex binding	1	1	0.0364347
GO	adenylate cyclase-activating adrenergic receptor signaling pathway involved in cardiac muscle relaxation	1	1	0.0364347
GO	positive regulation of relaxation of cardiac muscle	1	1	0.0364347
GO	negative regulation of cellular response to thapsigargin	1	1	0.0364347
GO	negative regulation of cellular response to tunicamycin	1	1	0.0364347
GO	perinuclear endoplasmic reticulum lumen	1	1	0.0364347
GO	regulation of neuronal signal transduction	1	1	0.0364347
GO	C-X-C chemokine receptor CXCR4 signaling pathway	1	1	0.0364347
GO	C-X-C motif chemokine 12 receptor activity	1	1	0.0364347
GO	CXCL12-activated CXCR4 signaling pathway	1	1	0.0364347
GO	enkephalin processing	1	1	0.0364347
GO	steroid 21-monooxygenase activity	1	1	0.0364347
GO	arachidonic acid 11,12-epoxygenase activity	1	1	0.0364347
GO	arachidonic acid 14,15-epoxygenase activity	1	1	0.0364347
GO	G protein-coupled nucleotide receptor binding	1	1	0.0364347
GO	P2Y1 nucleotide receptor binding	1	1	0.0364347
GO	neuron projection retraction	1	1	0.0364347
GO	10-hydroxy-9-(phosphonooxy)octadecanoate phosphatase activity	1	1	0.0364347
GO	prostaglandin production involved in inflammatory response	1	1	0.0364347
GO	stilbene catabolic process	1	1	0.0364347
GO	stilbene metabolic process	1	1	0.0364347
GO	negative regulation of renin secretion into blood stream	1	1	0.0364347
GO	anandamide amidohydrolase activity	1	1	0.0364347
GO	oleamide hydrolase activity	1	1	0.0364347
GO	branch elongation involved in ureteric bud branching	1	1	0.0364347
GO	VEGF-C-activated receptor activity	1	1	0.0364347
GO	activin receptor antagonist activity	1	1	0.0364347
GO	negative regulation of ectodermal cell fate specification	1	1	0.0364347
GO	regulation of ectodermal cell fate specification	1	1	0.0364347
GO	phosphoribosylformylglycinamidine cyclo-ligase activity	1	1	0.0364347
GO	phosphoribosylglycinamide formyltransferase activity	1	1	0.0364347
GO	glial cell-derived neurotrophic factor receptor activity	1	1	0.0364347
GO	milk ejection reflex	1	1	0.0364347
GO	vascular transport	1	1	0.0364347
GO	positive regulation of lipoprotein transport	1	1	0.0364347
GO	regulation of lipoprotein transport	1	1	0.0364347
GO	cellular response to 1-oleoyl-sn-glycerol 3-phosphate	1	1	0.0364347
GO	response to 1-oleoyl-sn-glycerol 3-phosphate	1	1	0.0364347
GO	vascular associated smooth muscle cell migration	1	1	0.0364347
GO	bombesin receptor activity	1	1	0.0364347
GO	hepatic duct development	1	1	0.0364347
GO	negative regulation of testosterone secretion	1	1	0.0364347
GO	cellular response to interleukin-18	1	1	0.0364347
GO	activin A complex	1	1	0.0364347
GO	activin complex	1	1	0.0364347
GO	positive regulation of collagen binding	1	1	0.0364347
GO	integrin alpha11-beta1 complex	1	1	0.0364347
GO	positive regulation of amino acid uptake involved in synaptic transmission	1	1	0.0364347
GO	positive regulation of glutamate uptake involved in transmission of nerve impulse	1	1	0.0364347
GO	gamma-catenin-TCF7L2 complex	1	1	0.0364347
GO	laminin-8 complex	1	1	0.0364347
GO	neuronal-glial interaction involved in cerebral cortex radial glia guided migration	1	1	0.0364347
GO	negative regulation of podosome assembly	1	1	0.0364347
GO	positive regulation of chondrocyte development	1	1	0.0364347
GO	positive regulation of chondrocyte hypertrophy	1	1	0.0364347
GO	regulation of chondrocyte hypertrophy	1	1	0.0364347
GO	phenylethylamine metabolic process	1	1	0.0364347
GO	rhabdomere	1	1	0.0364347
GO	methylated-DNA-[protein]-cysteine S-methyltransferase activity	1	1	0.0364347
GO	lung ciliated cell differentiation	1	1	0.0364347
GO	negative regulation of epithelial cell proliferation involved in lung morphogenesis	1	1	0.0364347
GO	neurotransmitter receptor cycle	1	1	0.0364347
GO	postsynaptic neurotransmitter receptor cycle	1	1	0.0364347
GO	spontaneous synaptic transmission	1	1	0.0364347
GO	glomerular endothelium development	1	1	0.0364347
GO	metanephric glomerular endothelium development	1	1	0.0364347
GO	metanephric glomerular epithelium development	1	1	0.0364347
GO	metanephric glomerular mesangial cell development	1	1	0.0364347
GO	positive regulation of hepatic stellate cell proliferation	1	1	0.0364347
GO	positive regulation of vascular smooth muscle cell dedifferentiation	1	1	0.0364347
GO	regulation of hepatic stellate cell proliferation	1	1	0.0364347
GO	negative regulation of granulosa cell apoptotic process	1	1	0.0364347
GO	positive regulation of cardioblast proliferation	1	1	0.0364347
GO	negative regulation of smooth muscle cell-matrix adhesion	1	1	0.0364347
GO	positive regulation of epithelium regeneration	1	1	0.0364347
GO	positive regulation of leukotriene production involved in inflammatory response	1	1	0.0364347
GO	positive regulation of neuroepithelial cell differentiation	1	1	0.0364347
GO	positive regulation of odontoblast differentiation	1	1	0.0364347
GO	regulation of leukotriene production involved in inflammatory response	1	1	0.0364347
GO	double-strand break repair via single-strand annealing	1	1	0.0364347
GO	cardiac muscle cell myoblast differentiation	1	1	0.0364347
GO	negative regulation of amniotic stem cell differentiation	1	1	0.0364347
GO	negative regulation of dense core granule biogenesis	1	1	0.0364347
GO	negative regulation of mesenchymal stem cell differentiation	1	1	0.0364347
GO	regulation of amniotic stem cell differentiation	1	1	0.0364347
GO	CX3C chemokine receptor binding	1	1	0.0364347
GO	CXCR1 chemokine receptor binding	1	1	0.0364347
GO	interleukin-8 receptor binding	1	1	0.0364347
GO	negative regulation of hippocampal neuron apoptotic process	1	1	0.0364347
GO	negative regulation of interleukin-1 alpha production	1	1	0.0364347
GO	positive regulation of calcium-independent cell-cell adhesion	1	1	0.0364347
GO	regulation of interleukin-1 alpha production	1	1	0.0364347
GO	diencephalon development	1	1	0.0364347
GO	signal clustering	1	1	0.0364347
GO	beta-galactoside alpha-2,6-sialyltransferase activity	1	1	0.0364347
GO	nerve growth factor receptor activity	1	1	0.0364347
GO	neurotensin receptor activity, non-G protein-coupled	1	1	0.0364347
GO	positive regulation of N-terminal peptidyl-lysine acetylation	1	1	0.0364347
GO	regulation of N-terminal peptidyl-lysine acetylation	1	1	0.0364347
GO	Ras palmitoyltransferase activity	1	1	0.0364347
GO	interleukin-15 receptor binding	1	1	0.0364347
GO	1-alkenylglycerophosphocholine O-acyltransferase activity	1	1	0.0364347
GO	1-alkylglycerophosphocholine O-acyltransferase activity	1	1	0.0364347
GO	negative regulation of phosphatidylcholine biosynthetic process	1	1	0.0364347
GO	cellular amide catabolic process	1	1	0.0364347
GO	intraciliary transport particle	1	1	0.0364347
GO	cell proliferation involved in endocardial cushion morphogenesis	1	1	0.0364347
GO	cell proliferation involved in heart morphogenesis	1	1	0.0364347
GO	inferior endocardial cushion morphogenesis	1	1	0.0364347
GO	positive regulation of tolerance induction to self antigen	1	1	0.0364347
GO	regulation of tolerance induction to self antigen	1	1	0.0364347
GO	superior endocardial cushion morphogenesis	1	1	0.0364347
GO	transforming growth factor beta receptor activity, type II	1	1	0.0364347
GO	mesenchymal-epithelial cell signaling involved in prostate gland development	1	1	0.0364347
GO	negative regulation of granuloma formation	1	1	0.0364347
GO	negative regulation of nucleotide-binding oligomerization domain containing 1 signaling pathway	1	1	0.0364347
GO	negative regulation of toll-like receptor 5 signaling pathway	1	1	0.0364347
GO	regulation of granuloma formation	1	1	0.0364347
GO	regulation of toll-like receptor 5 signaling pathway	1	1	0.0364347
GO	positive regulation of heart rate by epinephrine	1	1	0.0364347
GO	cell proliferation involved in heart valve development	1	1	0.0364347
GO	positive regulation of endocardial cushion to mesenchymal transition involved in heart valve formation	1	1	0.0364347
GO	positive regulation of endocardial cushion to mesenchymal transition	1	1	0.0364347
GO	regulation of endocardial cushion to mesenchymal transition involved in heart valve formation	1	1	0.0364347
GO	regulation of endocardial cushion to mesenchymal transition	1	1	0.0364347
GO	chondroitin sulfate proteoglycan biosynthetic process, polysaccharide chain biosynthetic process	1	1	0.0364347
GO	peptidoglycan glycosyltransferase activity	1	1	0.0364347
GO	follicular B cell differentiation	1	1	0.0364347
GO	negative regulation of vitamin D receptor signaling pathway	1	1	0.0364347
GO	negative regulation of timing of anagen	1	1	0.0364347
GO	positive regulation of transforming growth factor-beta secretion	1	1	0.0364347
GO	arginine decarboxylase activity	1	1	0.0364347
GO	trans-Golgi network membrane organization	1	1	0.0364347
GO	Golgi inheritance	1	1	0.0364347
GO	organelle inheritance	1	1	0.0364347
GO	negative regulation of cell growth involved in contact inhibition	1	1	0.0364347
GO	active borate transmembrane transporter activity	1	1	0.0364347
GO	borate transport	1	1	0.0364347
GO	aspartate N-acetyltransferase activity	1	1	0.0364347
GO	recycling endosome lumen	1	1	0.0364347
GO	mesenchymal to epithelial transition involved in metanephric renal vesicle formation	1	1	0.0364347
GO	mesenchymal to epithelial transition involved in renal vesicle formation	1	1	0.0364347
GO	smoothened signaling pathway involved in regulation of cerebellar granule cell precursor cell proliferation	1	1	0.0364347
GO	ventral midline determination	1	1	0.0364347
GO	positive regulation of acylglycerol transport	1	1	0.0364347
GO	positive regulation of triglyceride transport	1	1	0.0364347
GO	regulation of acylglycerol transport	1	1	0.0364347
GO	regulation of triglyceride transport	1	1	0.0364347
GO	positive regulation of meiotic chromosome separation	1	1	0.0364347
GO	positive regulation of metaphase/anaphase transition of meiosis I	1	1	0.0364347
GO	positive regulation of metaphase/anaphase transition of meiotic cell cycle	1	1	0.0364347
GO	regulation of metaphase/anaphase transition of meiosis I	1	1	0.0364347
GO	selenate reductase activity	1	1	0.0364347
GO	proteoglycan sulfotransferase activity	1	1	0.0364347
GO	neural plate anterior/posterior regionalization	1	1	0.0364347
GO	negative regulation of actin-dependent ATPase activity	1	1	0.0364347
GO	negative regulation of muscle filament sliding	1	1	0.0364347
GO	regulation of actin-dependent ATPase activity	1	1	0.0364347
GO	nucleus accumbens development	1	1	0.0364347
GO	carnitine transmembrane transport	1	1	0.0364347
GO	protein C-terminal S-isoprenylcysteine carboxyl O-methyltransferase activity	1	1	0.0364347
GO	S-adenosylmethioninamine metabolic process	1	1	0.0364347
GO	protein unfolding	1	1	0.0364347
GO	neutral sphingomyelin phosphodiesterase activity	1	1	0.0364347
GO	polysaccharide transport	1	1	0.0364347
GO	pyroglutamyl-peptidase activity	1	1	0.0364347
GO	pH-gated chloride channel activity	1	1	0.0364347
GO	Wnt protein secretion	1	1	0.0364347
GO	acetate ester biosynthetic process	1	1	0.0364347
GO	acetylcholine biosynthetic process	1	1	0.0364347
GO	acetylcholine secretion	1	1	0.0364347
GO	thiamine pyrophosphate transmembrane transporter activity	1	1	0.0364347
GO	3-dehydrosphinganine reductase activity	1	1	0.0364347
GO	3-keto-sphinganine metabolic process	1	1	0.0364347
GO	proepicardium cell migration involved in pericardium morphogenesis	1	1	0.0364347
GO	ethanolamine-phosphate phospho-lyase activity	1	1	0.0364347
GO	formamide metabolic process	1	1	0.0364347
GO	histidine catabolic process to glutamate and formamide	1	1	0.0364347
GO	imidazolonepropionase activity	1	1	0.0364347
GO	midbrain-hindbrain boundary initiation	1	1	0.0364347
GO	positive regulation of anterior head development	1	1	0.0364347
GO	prechordal plate formation	1	1	0.0364347
GO	regulation of anterior head development	1	1	0.0364347
GO	negative regulation of synapse maturation	1	1	0.0364347
GO	engulfment of target by autophagosome	1	1	0.0364347
GO	substrate localization to autophagosome	1	1	0.0364347
GO	cellular response to mineralocorticoid stimulus	1	1	0.0364347
GO	nuclear fragmentation involved in apoptotic nuclear change	1	1	0.0364347
GO	positive regulation of cardiac vascular smooth muscle cell differentiation	1	1	0.0364347
GO	response to mineralocorticoid	1	1	0.0364347
GO	establishment of planar polarity involved in neural tube closure	1	1	0.0364347
GO	negative regulation of calcium:sodium antiporter activity	1	1	0.0364347
GO	olfactory cortex development	1	1	0.0364347
GO	positive regulation of isoprenoid metabolic process	1	1	0.0364347
GO	positive regulation of retinoic acid biosynthetic process	1	1	0.0364347
GO	inositol lipid-mediated signaling	6	68	0.0371563
GO	response to interleukin-1	6	68	0.0371563
GO	hormone secretion	6	68	0.0371563
GO	inorganic molecular entity transmembrane transporter activity	29	561	0.0372492
GO	artery development	4	35	0.0373911
GO	regulation of postsynaptic membrane potential	4	35	0.0373911
GO	glial cell activation	4	35	0.0373911
GO	negative regulation of striated muscle cell differentiation	4	35	0.0373911
GO	negative regulation of Ras protein signal transduction	5	51	0.0374342
GO	negative regulation of muscle cell apoptotic process	5	51	0.0374342
GO	positive regulation of blood vessel diameter	5	51	0.0374342
GO	phosphorylation	40	821	0.037458
GO	taxis	14	226	0.0375255
GO	establishment of localization	120	2835	0.0380775
GO	ion binding	190	4677	0.038462
GO	G protein-coupled receptor activity	13	206	0.0387935
GO	regulation of leukocyte migration	11	165	0.0392119
GO	basolateral plasma membrane	11	165	0.0392119
GO	regulation of muscle cell apoptotic process	7	87	0.039272
GO	detection of abiotic stimulus	7	87	0.039272
GO	cellular response to BMP stimulus	3	21	0.0392822
GO	response to BMP	3	21	0.0392822
GO	midbrain development	3	21	0.0392822
GO	regulation of collateral sprouting	3	21	0.0392822
GO	presynaptic cytosol	3	21	0.0392822
GO	dendrite cytoplasm	3	21	0.0392822
GO	chondrocyte development	3	21	0.0392822
GO	transforming growth factor beta receptor binding	3	21	0.0392822
GO	potassium ion homeostasis	3	21	0.0392822
GO	cochlea morphogenesis	3	21	0.0392822
GO	regulation of epidermis development	6	69	0.0394954
GO	structural molecule activity	25	472	0.0397986
GO	kinase activity	34	682	0.0399309
GO	neuron to neuron synapse	5	52	0.0402254
GO	Leydig cell differentiation	2	9	0.0402527
GO	luteinization	2	9	0.0402527
GO	positive regulation of oxidative stress-induced neuron death	2	9	0.0402527
GO	regulation of tau-protein kinase activity	2	9	0.0402527
GO	retina vasculature morphogenesis in camera-type eye	2	9	0.0402527
GO	corpus callosum development	2	9	0.0402527
GO	venous blood vessel morphogenesis	2	9	0.0402527
GO	interkinetic nuclear migration	2	9	0.0402527
GO	amine binding	2	9	0.0402527
GO	hemidesmosome	2	9	0.0402527
GO	cellular response to muramyl dipeptide	2	9	0.0402527
GO	phenol-containing compound catabolic process	2	9	0.0402527
GO	invadopodium	2	9	0.0402527
GO	regulation of glomerular mesangial cell proliferation	2	9	0.0402527
GO	facial nerve structural organization	2	9	0.0402527
GO	regulation of lipoprotein lipase activity	2	9	0.0402527
GO	UDP-xylosyltransferase activity	2	9	0.0402527
GO	cell migration involved in heart development	2	9	0.0402527
GO	negative regulation of collateral sprouting	2	9	0.0402527
GO	response to redox state	2	9	0.0402527
GO	righting reflex	2	9	0.0402527
GO	cardiolipin binding	2	9	0.0402527
GO	diterpenoid biosynthetic process	2	9	0.0402527
[truncated: 5,440 more rows]

## Sheet: FFA83vsFF_Terms with Genes_down
Category	Term	Count in Selected Genes	Count in Total Population	P-value	Gene	Title	Symbol
[truncated: 32,504 more rows]

[truncated: 4 more sheets: LTFvsFF_EnrichedTerms_up, LTFvsFF_Terms with Genes_up, LTFvsFF_EnrichedTerms_down, LTFvsFF_Terms with Genes_down]
