# Supplementary material for: SMAD2/3 signaling in the uterine epithelium controls endometrial cell homeostasis and regeneration
Source: Research Square preprint supplement (doi:10.21203/rs.3.rs-2081589/v1), 2022-09-30
Supplement: Supplementary file 2 [file 9051dadba2ede72479acbc24.xlsx]

## Sheet: FF_direct_DOWNgenes_BETA_607
Chroms	txStart	txEnd	refseqID	rank product	Strands	GeneSymbol
chr2	73563280	73580338	NM_007389	6.353e-06	-	Chrna1
chr15	86057694	86137636	NM_172611	1.107e-05	+	Gramd4
chr8	95099827	95142540	NM_001145831	2.41e-05	-	Kifc3
chr11	103365091	103412664	NM_183034	3.949e-05	-	Plekhm1
chr2	91982327	92024170	NM_011957	5.28e-05	-	Creb3l1
chr4	136424611	136444401	NM_001285484	5.847e-05	+	Htr1d
chr17	46564450	46629504	NM_175168	5.891e-05	-	Ptk7
chr3	88616206	88648052	NM_001198911	6.337e-05	+	Arhgef2
chr8	4257645	4259274	NM_183315	6.357e-05	-	Ctxn1
chr4	128930232	128962455	NM_001301841	6.421e-05	-	Azin2
chr11	118428456	118451782	NM_001204129	8.299e-05	+	C1qtnf1
chr4	126232167	126256319	NM_001145970	0.0001125	-	Map7d1
chr8	64592550	64693040	NM_013494	0.0001325	-	Cpe
chr2	170346990	170427845	NM_001164369	0.0001678	-	Bcas1
chr9	54604996	54661885	NM_053178	0.0001848	-	Acsbg1
chr15	27466676	27594907	NM_020332	0.0001904	+	Ank
chr11	119314786	119345375	NM_130886	0.0002067	+	Card14
chr4	137468802	137570630	NM_008305	0.0002106	+	Hspg2
chr16	91547093	91564007	NM_008338	0.0002256	+	Ifngr2
chr18	35118911	35254775	NM_009818	0.0002495	+	Ctnna1
chr10	81292962	81319974	NM_001293647	0.0002511	+	Pip5k1c
chr7	99381548	99460984	NM_201352	0.0002539	+	Gdpd5
chr9	110621134	110624393	NM_026012	0.0002719	-	Nradd
chr11	103331483	103344702	NM_133715	0.0002749	-	Arhgap27
chr5	128601105	128604093	NM_175284	0.0002838	+	Fzd10
chr2	168261697	168269331	NM_001081134	0.0003167	-	Kcng1
chr10	94514856	94590954	NM_172051	0.0003173	+	Tmcc3
chr11	100140810	100145919	NM_008471	0.0003223	-	Krt19
chr12	80167541	80260371	NM_134156	0.0003555	-	Actn1
chr11	103070295	103101658	NM_152813	0.0003652	-	Plcd3
chr13	41309915	41359001	NM_017464	0.0004065	-	Nedd9
chr15	103344285	103366748	NM_010577	0.0004218	-	Itga5
chr6	72626370	72789045	NM_001079822	0.0004388	-	Tcf7l1
chr7	97480955	97541398	NM_027256	0.000445	+	Ints4
chr16	10959272	10993121	NM_019980	0.0004513	-	Litaf
chr17	36860690	36867187	NM_001024134	0.0004697	-	Trim15
chr12	85473900	85477270	NM_010234	0.0004948	+	Fos
chr15	101266845	101274794	NM_010444	0.0005011	+	Nr4a1
chr10	80409164	80433653	NM_001164150	0.0005608	-	Tcf3
chr7	143473754	143499332	NM_008767	0.0005752	+	Slc22a18
chr1	179668230	179687184	NM_178653	0.0005822	+	Sccpdh
chr5	35057083	35087831	NM_172708	0.000613	+	Dok7
chr8	68356780	68735146	NM_172753	0.000617	-	Csgalnact1
chr11	57645441	57787500	NM_134189	0.0006184	+	Galnt10
chr10	81321102	81326251	NM_027381	0.0006271	+	Cactin
chr2	70039125	70429195	NM_177376	0.000692	+	Myo3b
chr2	145786115	145887616	NM_028724	0.0007269	+	Rin2
chr8	92961046	93001667	NM_009209	0.0007504	+	Slc6a2
chr1	182313101	182341606	NM_175127	0.0007694	-	Fbxo28
chr11	100368855	100397790	NM_010593	0.0007884	-	Jup
chr8	111710474	111732136	NM_001198839	0.0008002	-	Bcar1
chr6	50293326	50456170	NM_001163645	0.0008369	-	Osbpl3
chr15	32920722	33034721	NM_008304	0.0008478	+	Sdc2
chr10	93247415	93311159	NM_001282967	0.0009097	-	Elk3
chr9	116087694	116175363	NM_029575	0.0009234	-	Tgfbr2
chr11	69673109	69681970	NM_030702	0.0009766	-	Senp3
chr4	126150601	126163341	NM_001162533	0.0009808	-	Sh3d21
chr11	69784035	69795937	NM_009601	0.001064	-	Chrnb1
chr18	38838672	38918699	NM_010197	0.001064	-	Fgf1
chr5	124598748	124627738	NM_026486	0.001113	+	Tctn2
chr7	24904345	24926591	NM_001130152	0.001206	+	Arhgef1
chr6	29735496	29761366	NM_176996	0.001226	+	Smo
chr2	173224464	173276533	NM_022995	0.001231	-	Pmepa1
chr3	89333392	89338028	NM_007910	0.001255	-	Efna4
chr4	46604389	46650199	NM_198664	0.00126	-	Tbc1d2
chr6	41620618	41636405	NM_022413	0.001274	-	Trpv6
chr19	42147388	42151703	NM_183195	0.001288	+	Marveld1
chr4	136653613	136836011	NM_010142	0.001303	-	Ephb2
chr4	120968316	121017247	NM_133716	0.001373	-	Smap2
chr19	37899035	38043577	NM_001302140	0.001383	-	Myof
chr2	73610659	73660423	NM_001166604	0.001388	-	Chn1
chr17	57249450	57263697	NM_001242389	0.001395	+	Trip10
chr3	95676200	95687917	NM_144899	0.001404	-	Adamtsl4
chr12	81631368	81664941	NM_001033149	0.001412	+	Ttc9
chr15	33083128	33594552	NM_018755	0.001422	+	Cpq
chr9	109816626	109826627	NM_183136	0.001476	+	Spink8
chr1	20890621	20938756	NM_028829	0.001482	+	Paqr8
chr7	141438514	141443355	NM_022654	0.001604	-	Pidd1
chr17	48419230	48432728	NM_009694	0.001611	-	Apobec2
chr2	165784151	165884838	NM_027230	0.001615	-	Zmynd8
chr6	17065148	17105825	NM_207176	0.00163	+	Tes
chr5	134945123	134946934	NM_009903	0.00164	-	Cldn4
chr1	36471596	36508776	NM_033570	0.001642	+	Cnnm4
chr4	126148002	126149874	NM_172145	0.001702	+	Eva1b
chr11	100131758	100135949	NM_008469	0.001704	-	Krt15
chr17	46650337	46664364	NM_025611	0.001711	+	Cul7
chr1	40515361	40551705	NM_010553	0.001743	+	Il18rap
chr1	189728267	189876693	NM_008976	0.001753	+	Ptpn14
chr5	134357660	134456716	NM_001081467	0.001773	-	Gtf2ird1
chr10	80301819	80318256	NM_011789	0.001799	+	Apc2
chr8	4253101	4256220	NM_133968	0.001822	+	Snapc2
chr7	24507086	24515682	NM_001290461	0.001863	+	Zfp428
chr8	4226826	4237470	NM_028175	0.001888	+	Lrrc8e
chr8	22227302	22261332	NM_019576	0.00191	+	Thsd1
chr2	163623272	163645143	NM_012032	0.001912	-	Serinc3
chr11	69846643	69852058	NR_033133	0.001946	+	Plscr3
chr1	39900912	40026310	NM_008696	0.001951	+	Map4k4
chr7	16175394	16186508	NM_001277989	0.001954	+	Meis3
chr10	82833950	82897724	NM_001042523	0.001992	+	Txnrd1
chr8	48110012	48141667	NM_001161515	0.00201	+	Dctd
chr8	92855349	92919279	NM_173014	0.002032	+	Lpcat2
chr16	11066297	11074986	NM_009223	0.002051	+	Snn
chr7	143052749	143067930	NM_133655	0.002114	+	Cd81
chr7	100176669	100184869	NM_001190869	0.002125	+	Kcne3
chr11	100408749	100414819	NM_176830	0.002149	-	P3h4
chr15	98632327	98644536	NM_001044741	0.002164	+	Cacnb3
chr11	118392751	118401931	NM_011150	0.002186	-	Lgals3bp
chr1	93685693	93695762	NM_016778	0.002205	+	Bok
chr11	62820252	62842948	NM_053169	0.002243	+	Trim16
chr12	31265293	31329639	NM_008482	0.002282	+	Lamb1
chr18	49979426	50093229	NM_001177760	0.002298	+	Tnfaip8
chr10	81273187	81291581	NM_001282095	0.002322	-	Tjp3
chr7	19212537	19224176	NM_175668	0.002362	+	Gpr4
chr10	3256207	3267771	NM_001204916	0.002381	-	H60c
chrX	75785653	75843021	NM_001166454	0.002412	-	Pls3
chr9	108517086	108560167	NM_001114119	0.002474	+	Qrich1
chr9	49436960	49486225	NM_172770	0.002532	-	Ttc12
chr10	19000909	19015410	NM_009397	0.002535	-	Tnfaip3
chr7	100869745	100932161	NM_001081116	0.002552	-	Arhgef17
chr2	152780663	152830717	NM_001289717	0.002559	-	Bcl2l1
chr18	69345720	69687967	NM_001083967	0.002594	+	Tcf4
chr8	90828834	91054508	NM_177224	0.002604	+	Chd9
chrX	20059569	20097520	NM_021715	0.002622	+	Chst7
chr3	95734147	95739569	NM_001252653	0.002673	-	Ecm1
chr2	168081003	168101203	NM_021409	0.002707	+	Pard6b
chr10	13207716	13474396	NM_001195065	0.002747	-	Phactr2
chr19	46305929	46312090	NM_001177370	0.002749	+	Nfkb2
chr4	129058270	129084526	NM_029219	0.002766	+	Rnf19b
chr3	92316704	92318085	NM_011469	0.002802	+	Sprr2b
chr15	97244073	97247287	NM_178114	0.002839	-	Amigo2
chr10	127063602	127067282	NM_009870	0.002851	+	Cdk4
chr5	124629051	124724455	NM_011596	0.002894	+	Atp6v0a2
chr12	76533559	76579039	NM_153804	0.002905	+	Plekhg3
chr8	106252547	106337988	NM_021491	0.002908	-	Smpd3
chr15	101996710	102004342	NM_031170	0.002936	-	Krt8
chr8	31111845	31131473	NM_175136	0.003012	+	Rnf122
chr8	34807609	34819894	NM_176933	0.003016	+	Dusp4
chr9	58524299	58540940	NM_133983	0.003032	-	Cd276
chr8	33653237	33698162	NM_010344	0.00304	+	Gsr
chr4	152274361	152285337	NM_178406	0.003041	+	Gpr153
chrX	96096044	96168553	NM_010833	0.003104	+	Msn
chr17	57279099	57329236	NM_011691	0.003108	+	Vav1
chr6	135137518	135168215	NM_013546	0.003118	-	Hebp1
chr11	60699689	60714188	NM_001159405	0.003157	+	Llgl1
chr6	83057843	83067219	NM_033606	0.003178	+	Dqx1
chr4	130792536	130826318	NM_011520	0.003202	+	Sdc3
chr12	85824949	86053760	NM_001081423	0.003246	+	Ttll5
chr4	43957701	43979118	NM_027450	0.003256	+	Glipr2
chr19	43956307	43986520	NM_030703	0.003285	-	Cpn1
chr10	56377299	56390419	NM_010288	0.003419	+	Gja1
chr10	81621785	81627608	NM_181586	0.00342	-	Sirt6
chr19	45047575	45056383	NM_001178012	0.003426	+	Sfxn3
chr10	59949674	59951770	NM_029083	0.003481	-	Ddit4
chr7	97842938	97912381	NM_011035	0.003484	+	Pak1
chr11	119143042	119228499	NM_172443	0.003505	-	Tbc1d16
chr7	19361215	19378533	NM_001010836	0.003528	+	Ppp1r13l
chr8	3493137	3497208	NM_080461	0.003528	+	Zfp358
chr19	46329811	46338660	NM_001164292	0.00357	-	Cuedc2
chr7	141468788	141471481	NM_001111050	0.003624	+	Cd151
chr16	45746230	45844378	NM_001252442	0.003637	-	Phldb2
chr3	67457998	67463907	NM_016753	0.003686	-	Lxn
chr7	19256929	19271854	NM_009499	0.003757	-	Vasp
chr8	47827605	47990551	NM_133791	0.003758	-	Wwc2
chrX	20662895	20683179	NM_001136085	0.003771	+	Uba1
chr16	3946932	3976632	NM_001081280	0.003795	-	Nlrc3
chr4	128727570	128752881	NM_001195083	0.003864	+	Phc2
chr7	144435723	144470935	NM_007803	0.00387	-	Cttn
chr7	141079768	141090510	NM_019762	0.00389	+	Pkp3
chr17	37001162	37010729	NM_001168502	0.003891	+	Zfp57
chr19	24094501	24174140	NM_001198985	0.003927	-	Tjp2
chr8	70282998	70294361	NM_001146153	0.003947	+	Homer3
chr2	72476218	72486890	NM_025866	0.004017	+	Cdca7
chr16	84774122	84826375	NM_023844	0.004028	+	Jam2
chr5	34573713	34632305	NM_001102444	0.004075	+	Add1
chr11	99209047	99231017	NM_020618	0.00432	-	Smarce1
chr11	67854522	67922153	NM_173754	0.004325	-	Usp43
chr4	43513725	43523554	NM_001277876	0.004338	-	Tpm2
chr6	88198663	88207032	NM_008090	0.004413	+	Gata2
chr8	35824708	35826559	NM_027998	0.004414	-	Cldn23
chr4	137741730	137796384	NM_007431	0.004418	-	Alpl
chr17	36837145	36859398	NM_001286726	0.004428	+	Trim26
chr7	88430272	88491572	NM_028238	0.004462	+	Rab38
chr10	45067213	45158995	NM_011156	0.004528	+	Prep
chr11	68432124	68497846	NM_177320	0.00455	+	Pik3r5
chr2	166073898	166155285	NM_001252578	0.00456	-	Sulf2
chrX	73433704	73435343	NM_011907	0.004569	-	Trex2
chr11	114790668	114795892	NM_028055	0.004572	-	Btbd17
chr11	62077023	62223013	NM_001029936	0.004579	+	Specc1
chr8	121097556	121108379	NM_172761	0.004628	-	Mthfsd
chr18	61696836	61707635	NM_172832	0.00466	-	Pcyox1l
chr10	99263230	99267489	NM_026268	0.004671	+	Dusp6
chr19	38097078	38114263	NM_181748	0.004728	+	Ffar4
chr6	17306334	17341328	NM_007616	0.00479	+	Cav1
chr15	101128521	101145336	NM_001277255	0.004799	+	Acvrl1
chr11	99514623	99521258	NM_213730	0.00483	-	Krt39
chr7	143688761	143741963	NM_024289	0.00497	-	Osbpl5
chr10	127182520	127190054	NM_028027	0.00501	-	Arhgef25
chr4	43406501	43427092	NM_199057	0.005022	+	Rusc2
chr4	132184915	132212256	NM_145393	0.005079	-	Ythdf2
chr16	97447034	97462906	NR_003520	0.005083	-	Mx1
chr7	19345070	19354830	NM_001127324	0.005104	+	Ercc1
chr6	142490248	142507957	NM_008492	0.005119	-	Ldhb
chr16	92498146	92541241	NM_172469	0.005124	+	Clic6
chr3	94612752	94658872	NM_001293728	0.00514	-	Tuft1
chrX	7668115	7671278	NM_019755	0.00515	-	Plp2
chr9	109095435	109119915	NM_172775	0.005198	+	Plxnb1
chr4	156165289	156197488	NM_021604	0.005201	-	Agrn
chr16	97855208	97922633	NM_174847	0.005223	-	C2cd2
chr11	106156255	106160142	NM_172397	0.005239	-	Limd2
chr3	36448923	36475887	NM_009673	0.005307	-	Anxa5
chr4	132639045	132724765	NM_010166	0.00533	+	Eya3
chr11	99579976	99581016	NM_027157	0.005359	-	Krtap1-5
chr17	36881597	36890125	NM_001172168	0.005491	-	Trim40
chrX	133582860	133688993	NM_001105246	0.005512	-	Pcdh19
chr11	102838471	102880975	NM_011431	0.005513	-	Eftud2
chr4	152307022	152318625	NM_001033489	0.005536	-	Rnf207
chr9	116572746	117252483	NM_001172126	0.005566	-	Rbms3
chr9	56135883	56161070	NM_019793	0.005614	-	Tspan3
chr15	84076096	84105754	NM_013873	0.005671	-	Sult4a1
chr9	108662097	108684641	NM_020520	0.005688	+	Slc25a20
chr15	81686166	81697287	NM_001164320	0.005688	-	Chadl
chr2	75675518	75704641	NM_010902	0.005719	-	Nfe2l2
chr2	91932821	91963563	NM_138306	0.005854	-	Dgkz
chr8	13952007	13974777	NM_173744	0.005866	-	Tdrp
chr17	45660176	45686218	NM_198167	0.005867	-	Tmem63b
chr8	116568723	116732991	NM_029441	0.005902	-	Cdyl2
chr7	104218794	104235152	NM_001013616	0.00592	+	Trim6
chr19	40222238	40271616	NM_016861	0.005944	-	Pdlim1
chr7	19291068	19296164	NM_001025364	0.005949	+	Rtn2
chr4	45799021	45804608	NM_028270	0.005956	+	Aldh1b1
chr7	98143358	98145447	NM_011010	0.005994	-	Omp
chr5	24592621	24602002	NM_025891	0.005997	-	Smarcd3
chr16	96121587	96127725	NM_008251	0.006028	-	Hmgn1
chr19	34240335	34255373	NM_007392	0.006046	-	Acta2
chr17	36869573	36877833	NM_011280	0.006148	+	Trim10
chr7	89507784	89517586	NM_029614	0.006191	-	Prss23
chr9	110880173	110900530	NM_001146059	0.006194	+	Als2cl
chr8	104340593	104347672	NM_024217	0.006322	+	Cmtm3
chr10	19591957	19610225	NM_010511	0.006388	+	Ifngr1
chr10	111506285	111508649	NM_009344	0.00643	+	Phlda1
chr10	39612933	39655307	NM_134000	0.006499	+	Traf3ip2
chr8	120608601	120634382	NM_197988	0.006523	-	1190005I06Rik
chr8	25039143	25101811	NM_031257	0.006558	-	Plekha2
chr4	138250410	138260968	NM_001099631	0.00665	+	Sh2d5
chr6	58596671	58692451	NM_011920	0.006655	+	Abcg2
chr1	39194271	39363240	NM_008719	0.006664	+	Npas2
chr5	125475872	125517403	NM_030210	0.006778	+	Aacs
chr11	114675467	114720984	NM_053273	0.006837	+	Ttyh2
chr15	102028215	102032026	NM_010664	0.006857	+	Krt18
chr16	4594712	4615957	NM_031184	0.006922	+	Glis2
chr17	56162490	56173955	NM_025566	0.006968	+	Tnfaip8l1
chr8	3393007	3456600	NM_133962	0.007021	+	Arhgef18
chr4	135369576	135398227	NM_001168500	0.007024	-	Ncmap
chr7	100159276	100160931	NM_026010	0.007027	+	Lipt2
chr8	117498290	117635142	NM_172285	0.007067	+	Plcg2
chr19	46886830	46969567	NM_001164365	0.007166	-	Nt5c2
chr8	57482701	57487860	NM_021788	0.007166	-	Sap30
chr15	83125977	83149336	NM_178627	0.007195	-	Poldip3
chr6	94604528	94700145	NM_008377	0.007307	-	Lrig1
chr1	106770787	106796725	NM_009190	0.007339	-	Vps4b
chr11	99315843	99322941	NM_133730	0.007374	-	Krt25
chr5	24685814	24710555	NM_016736	0.007374	+	Nub1
chr1	92831685	92860196	NM_016696	0.007376	+	Gpc1
chr15	85535436	85578070	NM_001163634	0.00741	-	Wnt7b
chr8	105280408	105289528	NM_001166394	0.007452	-	4931428F04Rik
chr4	48585192	48663131	NM_021436	0.007458	+	Tmeff1
chr8	13567217	13677587	NM_009025	0.00746	-	Rasa3
chr7	24399627	24422777	NM_028047	0.007531	+	Smg9
chr7	4151259	4164699	NM_021454	0.007559	-	Cdc42ep5
chr9	57560943	57588798	NM_022813	0.007565	+	Scamp2
chr7	99153662	99182713	NM_026384	0.007596	-	Dgat2
chr4	127325234	127330836	NM_001160012	0.007619	-	Gjb3
chr4	134129857	134187085	NM_144527	0.007641	-	Cep85
chr1	182467258	182517483	NM_009794	0.007655	-	Capn2
chr5	134237831	134314760	NM_010365	0.007676	-	Gtf2i
chr14	121035573	121283726	NM_134082	0.007782	+	Farp1
chr1	106861179	106883348	NM_009257	0.007799	+	Serpinb5
chr4	129513580	129515981	NM_010807	0.007861	+	Marcksl1
chr10	26772511	26918648	NM_176837	0.007863	+	Arhgap18
chr7	100996567	101012053	NM_001302346	0.008058	-	P2ry2
chr18	46713204	46728342	NM_033037	0.00811	-	Cdo1
chr9	114789344	114844152	NM_027294	0.008139	-	Cmtm8
chr9	109931773	110083954	NM_001205332	0.008163	+	Map4
chr7	19518730	19525050	NM_027116	0.008258	+	Nkpd1
chr7	99268345	99337137	NM_001043355	0.008273	+	Map6
chr18	24579880	24603817	NM_139143	0.008315	-	Slc39a6
chr19	42725857	42752775	NM_029011	0.008354	-	Pyroxd2
chr13	53109316	53286109	NM_013846	0.008363	-	Ror2
chr10	24223516	24302783	NM_021509	0.008369	+	Moxd1
chr2	85050459	85073048	NM_001081260	0.008392	+	Tnks1bp1
chrX	139821634	139871654	NM_029413	0.008412	-	Morc4
chr10	120781100	120898971	NM_177092	0.008419	-	Msrb3
chr3	68468182	68626482	NM_001282045	0.008436	+	Schip1
chr6	42672546	42693059	NM_029930	0.008439	-	Tcaf1
chr4	47015688	47057306	NM_001024136	0.008444	-	Anks6
chr18	78750377	79109391	NM_053099	0.008466	-	Setbp1
chr4	129516103	129542646	NM_008228	0.008474	-	Hdac1
chr7	143107253	143427042	NM_008434	0.008522	+	Kcnq1
chr7	142434976	142440396	NM_018802	0.008561	+	Syt8
chr7	100937633	100964366	NM_183168	0.008636	-	P2ry6
chr4	138313409	138326296	NM_026880	0.008674	-	Pink1
chr17	46257850	46283026	NM_001252475	0.008724	-	Tjap1
chr9	110866045	110880083	NM_146260	0.008752	-	Tmie
chr6	107529725	107570228	NM_008516	0.008754	+	Lrrn1
chr6	146888493	147032023	NM_026221	0.008779	+	Ppfibp1
chr16	57624255	57754737	NM_007739	0.008787	-	Col8a1
chr8	105900473	105931802	NM_173432	0.008832	+	Pskh1
chr18	60600205	60610104	NM_001109975	0.008861	-	Synpo
chr2	84678401	84688215	NM_025885	0.008873	+	Med19
chr4	42953093	42958732	NM_019874	0.008933	+	Dnajb5
chr19	37434840	37440731	NM_008245	0.009056	+	Hhex
chr16	91485214	91510522	NM_010508	0.009107	+	Ifnar1
chr2	156613696	156764363	NM_146128	0.009174	+	Dlgap4
chr19	44147636	44192442	NM_181422	0.009203	-	Pkd2l1
chr7	101289615	101302088	NM_001111111	0.009279	-	Atg16l2
chr5	24418241	24423530	NM_007668	0.009321	-	Cdk5
chr16	4639944	4651166	NM_139307	0.009431	+	Vasn
chr4	129219577	129248443	NM_001033189	0.009443	-	C77080
chr6	71128165	71144380	NM_178413	0.009463	-	Thnsl2
chr9	121760032	121771742	NM_001166644	0.009524	+	Zfp651
chr7	25295048	25297955	NM_008776	0.009556	-	Pafah1b3
chr5	121817214	121836801	NM_008507	0.009567	-	Sh2b3
chr12	73997760	74267916	NM_172804	0.00958	+	Syt16
chr7	24370262	24385212	NM_001163510	0.009599	+	Kcnn4
chr4	127351085	127354081	NM_008127	0.009636	-	Gjb4
chr8	109705545	109724932	NM_001167946	0.009652	+	Zfp821
chr5	120613129	120628592	NM_028041	0.009655	+	Ddx54
chr10	58323465	58424691	NM_026148	0.009686	+	Lims1
chr3	36475936	36482299	NM_028183	0.009812	+	1810062G17Rik
chr2	156196646	156309953	NM_172674	0.009837	+	Phf20
chr11	59407149	59449956	NM_144521	0.009905	-	Snap47
chr6	31519492	31563937	NM_013723	0.009968	-	Podxl
chr4	123787874	123829904	NM_183163	0.01026	+	Rhbdl2
chr6	47244395	47301371	NM_025771	0.0103	+	Cntnap2
chr8	94772179	94782426	NM_009142	0.0104	+	Cx3cl1
chr10	3872666	3967302	NM_001033253	0.01041	+	Plekhg1
chr12	83546940	83597147	NM_183154	0.01046	-	Zfyve1
chr7	19779717	19796809	NM_001161844	0.01047	-	Cblc
chrX	159988432	160123351	NM_001163085	0.01051	+	Map3k15
chr1	37872205	37876298	NM_001037918	0.01052	+	Lipt1
chr18	67933256	68255549	NM_172631	0.0106	+	Ldlrad4
chr8	105768307	105827350	NM_145824	0.01062	-	Ranbp10
chr16	36693977	36726804	NM_001285791	0.01062	+	Ildr1
chr5	121567686	121593824	NM_009656	0.01069	-	Aldh2
chr9	108572312	108578670	NM_031392	0.01101	-	Wdr6
chr18	75367364	75395934	NM_001042660	0.01123	+	Smad7
chr18	37720553	37841870	NM_033576	0.01125	+	Pcdhgb4
chr9	110132023	110240178	NM_009211	0.01126	+	Smarcc1
chr2	151572622	151590005	NM_145535	0.0113	+	Sdcbp2
chr10	108332188	108414391	NM_054056	0.01137	+	Pawr
chr9	120933399	120960507	NM_007614	0.01137	+	Ctnnb1
chr1	182764905	182895654	NM_144796	0.01143	+	Susd4
chr17	45555699	45563168	NM_001304956	0.01145	+	Nfkbie
chr8	109671320	109693294	NM_028018	0.01147	-	Ist1
chr7	25221450	25227505	NM_175436	0.0116	+	Zfp526
chr6	72957346	72958232	NM_001039392	0.01165	-	Tmsb10
chr7	99811438	99828417	NM_016720	0.01166	-	Neu3
chr18	66458603	66465558	NM_021451	0.01166	+	Pmaip1
chr11	69878263	69880985	NM_153143	0.01173	-	Kctd11
chr4	41136020	41193370	NM_026275	0.0118	+	Ube2r2
chr19	45578256	45660193	NM_013907	0.01185	-	Fbxw4
chr9	111019291	111042766	NM_008522	0.0119	+	Ltf
chr6	48062394	48086593	NM_001163475	0.01193	-	Zfp746
chr8	3587449	3609075	NM_027171	0.01197	+	Camsap3
chr18	37936970	37954988	NM_010411	0.01199	-	Hdac3
chr4	130165599	130174802	NM_001168333	0.01201	-	Tinagl1
chr2	165377435	165388259	NM_178411	0.01214	-	Zfp334
chr2	155236607	155250277	NM_001291108	0.01222	+	Dynlrb1
chr8	118283754	119323448	NM_019707	0.01253	+	Cdh13
chr3	90072650	90100902	NM_022314	0.01256	+	Tpm3
chr3	92365186	92366442	NM_011472	0.01264	+	Sprr2f
chr7	25687001	25704996	NM_011577	0.01273	+	Tgfb1
chr5	125385964	125390017	NM_019639	0.01283	-	Ubc
chr18	80046894	80119640	NM_053117	0.01284	+	Pard6g
chr9	58287722	58313212	NM_010729	0.01285	-	Loxl1
chr8	106415338	106425889	NM_011764	0.01291	+	Zfp90
chr6	86386005	86397150	NM_025823	0.01293	-	Pcyox1
chr10	93523337	93540033	NM_027908	0.01294	-	Amdhd1
chr6	51432669	51458768	NM_010903	0.01308	+	Nfe2l3
chr2	91061780	91070315	NM_026721	0.01313	-	Slc39a13
chr12	78888696	78906938	NM_013738	0.01318	-	Plek2
chr19	45363733	45533343	NM_009771	0.01318	+	Btrc
chr2	165288030	165320826	NM_001302752	0.0132	-	Elmo2
chr7	144578322	144582436	NM_010175	0.01325	-	Fadd
chr9	58253163	58262524	NR_028146	0.01331	+	Stoml1
chr11	55394158	55420080	NM_009242	0.01331	-	Sparc
chr5	30950065	30955095	NR_003522	0.01332	+	Abhd1
chr19	56461636	56486729	NM_001164263	0.01333	+	Plekhs1
chr9	114756835	114781993	NM_133978	0.01337	-	Cmtm7
chr7	3665753	3677553	NM_181820	0.01338	-	Tmc4
chr10	23796985	23827968	NM_183116	0.01342	+	Slc18b1
chr5	125441567	125460885	NM_029752	0.01345	+	Bri3bp
chr16	97947434	97962621	NM_175428	0.01345	-	Zbtb21
chr18	62177712	62179981	NM_007420	0.0135	-	Adrb2
chr7	25461701	25477625	NM_001039186	0.01353	-	Ceacam1
chr7	16494472	16614993	NM_172739	0.01353	-	Arhgap35
chr11	69580358	69591873	NM_011640	0.01355	+	Trp53
chr10	41487171	41490340	NM_009213	0.01364	-	Smpd2
chr11	109473373	109573329	NM_028710	0.01379	+	Arsg
chr9	61372365	61418497	NM_001083928	0.01397	+	Tle3
chr7	19606222	19629438	NM_001290457	0.01405	-	Relb
chr7	102239122	102250118	NM_019566	0.01418	-	Rhog
chr4	130253496	130275586	NM_172702	0.01431	-	Serinc2
chr9	58217179	58249786	NM_008884	0.01438	-	Pml
chr15	99717592	99725007	NM_010271	0.01448	+	Gpd1
chr17	40875481	40880558	NM_027834	0.01455	-	9130008F23Rik
chr10	93453395	93484896	NM_008517	0.01455	+	Lta4h
chr11	69897357	69900986	NM_027419	0.01458	-	2810408A11Rik
chr8	105943589	105966115	NR_045594	0.01461	-	Slc12a4
chr11	69765911	69784026	NM_029348	0.01464	+	Zbtb4
chr6	86647044	86669159	NM_010751	0.01483	-	Mxd1
chr1	125392904	125435727	NM_001205386	0.01485	-	Actr3
chr2	157424292	157471838	NM_009271	0.01495	+	Src
chr18	36671158	36679366	NM_146085	0.01512	-	Apbb3
chr9	59291571	59316200	NM_028121	0.01531	+	Adpgk
chr10	59446983	59616692	NM_001033259	0.01538	-	Mcu
chrX	163950385	163958666	NM_178794	0.01539	-	Zrsr2
chr6	18170686	18322769	NM_021050	0.0154	+	Cftr
chr6	136923660	136939527	NM_001301303	0.01551	-	Arhgdib
chr10	21124929	21160984	NM_001198914	0.01552	-	Myb
chr8	69135502	69140953	NM_199364	0.01555	-	Lzts1
chr5	131437681	132542343	NM_177047	0.01556	-	Auts2
chr10	3366149	3464975	NM_133485	0.01557	+	Ppp1r14c
chr6	38697839	38876190	NM_001294144	0.01563	-	Hipk2
chrX	71050255	71154717	NM_001256048	0.01568	+	Mamld1
chr19	40831278	40848570	NM_172839	0.01568	+	Ccnj
chr9	119444922	119465518	NM_001172136	0.01581	+	Exog
chr11	119343488	119355510	NM_018822	0.01582	-	Sgsh
chr1	192844487	192855752	NM_198247	0.01587	-	Sertad4
chr7	19004064	19006763	NM_178757	0.01594	+	Irf2bp1
chr4	134127405	134128753	NM_080559	0.01624	-	Sh3bgrl3
chr8	18932728	18950871	NM_001286469	0.01629	-	Xkr5
chr11	116470815	116490346	NM_026364	0.01636	-	Prpsap1
chr3	89377645	89393203	NM_009565	0.01637	-	Zbtb7b
chr7	141215859	141218658	NM_025886	0.01638	+	Rassf7
chr11	61488811	61494266	NM_011841	0.01664	-	Mapk7
chr8	11613840	11635036	NR_030781	0.01665	-	Ankrd10
chr15	3963563	3979573	NM_134099	0.01672	-	Fbxo4
chr19	26748402	26778321	NM_026003	0.01675	+	Smarca2
chr5	34949447	35033593	NM_173402	0.01676	+	Rgs12
chr16	90830858	90904885	NM_001199210	0.0168	+	Eva1c
chr12	81492193	81532907	NM_025292	0.0168	-	Synj2bp
chr18	24708622	25133507	NM_001289655	0.0168	+	Fhod3
chr8	18690262	18741562	NM_007426	0.01684	-	Angpt2
chr2	91257328	91264680	NM_028733	0.01685	+	Pacsin3
chr2	155634276	155692384	NM_001163452	0.01689	-	Trpc4ap
chr5	134656038	134688590	NM_010717	0.01692	-	Limk1
chr10	111985447	111997264	NM_028608	0.01705	-	Glipr1
chr10	24915206	24927470	NM_007482	0.01711	-	Arg1
chr2	71211705	71263302	NM_001198874	0.01715	+	Dync1i2
chr4	123349632	123684360	NM_001199136	0.01718	-	Macf1
chr7	18884689	18890438	NM_009402	0.01726	+	Pglyrp1
chr4	43507025	43513725	NM_139305	0.01751	+	Car9
chr6	34709443	34775469	NM_145575	0.01756	+	Cald1
chr3	95111041	95123051	NM_009336	0.01757	+	Vps72
chr3	95743852	95754977	NM_001163619	0.01761	-	Tars2
chr4	45297167	45316131	NM_027266	0.01773	+	Trmt10b
chr3	81036415	81214031	NM_019971	0.01776	+	Pdgfc
chr18	42645220	42899506	NR_073583	0.01777	-	Ppp2r2b
chr11	61775597	61855092	NM_013881	0.01785	-	Ulk2
chr5	122850187	122868945	NM_030564	0.01788	+	Rnf34
chr15	97247106	97385691	NM_172293	0.01817	+	Pced1b
chr4	134228041	134238399	NM_001081047	0.0182	-	Cnksr1
chr2	164053539	164071169	NM_001291155	0.01831	-	Tomm34
chr10	13090787	13131695	NM_009538	0.01848	+	Plagl1
chr7	6315664	6330434	NM_001033249	0.01855	-	Zfp583
chr1	40580226	40630731	NM_177084	0.01859	+	Slc9a4
chr6	48554798	48570722	NM_001110160	0.01861	+	Lrrc61
chr16	84954435	85173707	NM_001198824	0.01886	-	App
chr8	61511428	61760098	NM_001293773	0.01886	-	Palld
chr10	18845070	18857072	NM_022032	0.01898	+	Perp
chr7	18890883	18910404	NM_001033314	0.01915	-	Ccdc61
chr8	35587797	35679449	NM_001081279	0.01933	+	Mfhas1
chr3	86137939	86142668	NM_016959	0.0195	-	Rps3a1
chr3	95129718	95134012	NM_001163573	0.01957	-	Scnm1
chr7	105371210	105400054	NM_001242365	0.0198	-	Fam160a2
chr12	40059770	40134228	NM_001146196	0.0198	-	Scin
chrX	166238942	166389033	NM_023122	0.0199	+	Gpm6b
chr11	99415663	99422259	NM_010661	0.01992	-	Krt12
chr2	168925360	168955587	NM_009564	0.01996	-	Zfp64
chr3	79813152	79842662	NM_027495	0.02001	-	Tmem144
chr16	97741941	97763755	NM_023663	0.02014	-	Ripk4
chr10	13552906	13563376	NM_025748	0.02017	+	Adat2
chrX	20703908	20720539	NM_145628	0.02028	+	Usp11
chr9	56041844	56059083	NM_011992	0.02034	+	Rcn2
chr5	124862704	124888630	NM_001081750	0.02039	+	Zfp664
chr18	35726988	35730869	NM_001033168	0.02046	+	1700066B19Rik
chr15	102234937	102246500	NM_001042727	0.02049	-	Rarg
chr18	37742093	37841872	NM_033578	0.02072	+	Pcdhgb6
chr18	67225529	67245830	NM_172630	0.02103	-	Mppe1
chr10	100015823	100100412	NM_013598	0.02103	+	Kitl
chr12	83520465	83541992	NM_030246	0.02103	+	Dcaf4
chr9	114375130	114390712	NM_019922	0.02125	-	Crtap
chr15	89142483	89149606	NM_011161	0.02141	-	Mapk11
chr6	48895254	48909187	NM_029638	0.02152	+	Aoc1
chr2	163863880	163918683	NM_183023	0.02152	-	Rims4
chr19	47731755	47735588	NM_026377	0.02184	+	Sfr1
chr2	57237677	57370719	NM_001145820	0.02191	+	Gpd2
chr2	69822369	69836651	NM_177784	0.02192	+	Klhl23
chr4	152199843	152271855	NM_001146058	0.02198	+	Acot7
chr17	43952998	44039516	NM_001286654	0.02204	+	Rcan2
chr11	119491619	119511465	NM_177394	0.02207	+	Endov
chr5	29434666	29452169	NM_001033457	0.02207	+	Nom1
chr3	59178913	59195104	NM_001302203	0.02209	-	Gpr87
chr10	40883533	40938569	NM_031877	0.0222	+	Wasf1
chr11	69995765	70000011	NM_030064	0.02224	+	Phf23
chr19	3259075	3283010	NM_009212	0.02232	-	Ighmbp2
chr9	110333287	110384949	NM_001103162	0.02233	+	Scap
chr7	97550330	97579497	NM_183251	0.02242	-	Aamdc
chr9	114401077	114474379	NM_009752	0.02243	+	Glb1
chrX	8193849	8206525	NM_016913	0.02249	-	Porcn
chr2	84600780	84650740	NM_007615	0.02261	-	Ctnnd1
chr11	116287997	116306738	NM_001162872	0.02263	-	Exoc7
chr8	27123831	27128632	NM_025686	0.02267	-	Brf2
chr8	107436397	107558595	NM_025830	0.02267	+	Wwp2
chr11	69803594	69805624	NM_001033433	0.02269	-	Tmem102
chr7	19394439	19399921	NM_001286038	0.02271	-	Klc3
chr2	167015312	167034945	NM_153065	0.02275	+	Ddx27
chr7	99345374	99353239	NM_009825	0.02278	-	Serpinh1
chr7	19631579	19665030	NM_019649	0.0229	-	Clptm1
chr2	54084092	54085552	NM_023396	0.02291	-	Rprm
chr18	35650350	35655199	NM_001270646	0.02302	-	Prob1
chr4	48540498	48561920	NM_028137	0.02303	+	Msantd3
chr9	46012819	46224194	NM_027498	0.02322	+	Sik3
chr5	124834431	124862221	NM_144819	0.02325	-	Ccdc92
chr8	109548023	109565601	NM_178380	0.02342	-	Dhx38
chr4	41114426	41124339	NM_139236	0.02362	-	Nol6
chr5	123907274	123928832	NM_026603	0.02365	+	Denr
chr1	36068399	36106446	NM_015818	0.024	+	Hs6st1
chr7	27342132	27356008	NM_138676	0.02418	-	Shkbp1
chr17	56892610	56935388	NM_022328	0.02442	-	Mllt1
chrX	73483634	73495936	NM_007542	0.02457	+	Bgn
chr2	165000356	165034779	NM_144892	0.02462	-	Ncoa5
chr10	34151392	34207551	NM_172508	0.02482	-	Dse
chr10	116485160	116581511	NM_001037846	0.02491	-	Cnot2
chr1	106720409	106759742	NM_027534	0.02505	-	Kdsr
chr5	4753838	4758216	NM_021457	0.02515	-	Fzd1
chr7	19577286	19580656	NM_022409	0.02516	+	Zfp296
chr1	193302242	193343878	NM_001277928	0.02529	+	Lamb3
chr5	130257036	130341567	NM_001015876	0.02529	+	Tyw1
chr19	52991179	53038654	NM_133216	0.02534	-	Xpnpep1
chr3	92339139	92340873	NM_011470	0.02535	+	Sprr2d
chr4	130913333	130936148	NM_010686	0.02537	+	Laptm5
chrX	99465733	99470735	NM_008853	0.02545	-	Pja1
chr15	89130583	89140703	NM_013871	0.02547	-	Mapk12
chr2	165055635	165071654	NR_027852	0.02547	+	Cd40
chr2	169633645	169888504	NM_080455	0.02557	+	Tshz2
chr9	58129087	58153997	NM_001162475	0.0256	+	Stra6
chr9	57708568	57750162	NM_153799	0.02563	+	Edc3
chr11	102761438	102780262	NM_001110778	0.02576	+	Adam11
chr6	38663068	38680865	NM_001101507	0.02599	+	Clec2l
chrX	20933394	20950608	NM_007922	0.02599	-	Elk1
chr18	76261120	76311747	NM_001252481	0.026	+	Smad2
chr15	25363276	25413764	NM_027395	0.02605	-	Basp1
chr7	4548613	4604041	NM_207270	0.02622	-	Ptprh
chrX	48171970	48208702	NM_172465	0.02637	-	Zdhhc9
chr6	17749169	17943023	NM_001083315	0.02651	+	St7
chr8	22462613	22476879	NM_001012667	0.02653	-	Smim19
chr15	27605920	27630693	NM_001013792	0.02666	-	Otulin
chr1	105276916	105356710	NM_178779	0.027	-	Rnf152
chr11	70018604	70045531	NM_007864	0.02701	+	Dlg4
chr7	6172512	6193104	NM_028316	0.02707	+	Zfp444
chrX	95420313	95444840	NM_175179	0.02716	-	Amer1
chr10	117050997	117063814	NM_007636	0.02736	-	Cct2
chr11	99428402	99438153	NM_023256	0.0274	-	Krt20
chr3	93442329	93449077	NM_001163098	0.02756	+	Tchh
chr2	172868011	172940321	NM_007557	0.02768	-	Bmp7
chr11	58104152	58118594	NM_026949	0.02785	+	Cnot8
chr2	66184326	66256617	NM_001047604	0.02787	-	Ttc21b
chr2	164596457	164613626	NM_001080550	0.02801	-	Wfdc8
chr4	45184905	45285936	NM_001081172	0.0282	+	Frmpd1
chr18	24603960	24638830	NM_021448	0.02847	+	Elp2
chr13	52583436	52648792	NM_001198977	0.0287	+	Syk
chr10	60181527	60219260	NM_016803	0.02886	-	Chst3
chr9	114731202	114749343	NM_026036	0.02954	+	Cmtm6
chrX	159255781	159368244	NM_148945	0.03	+	Rps6ka3
chr18	46850038	46905446	NM_029008	0.03003	+	Lvrn
chr16	52248995	52452997	NM_009655	0.03032	-	Alcam
chrX	73774421	73778924	NM_019684	0.03039	+	Srpk3
chr18	32816859	32819799	NR_033206	0.03053	+	Tslp
chr10	86779004	86838389	NM_175331	0.03056	+	Nt5dc3
chr3	38449260	38484816	NM_001167883	0.03066	-	Ankrd50
chr11	54910786	54962940	NM_001199276	0.0311	-	Tnip1
chr18	32240330	32270147	NM_133658	0.03115	+	Ercc3
chrX	136954987	136976874	NM_207267	0.03133	-	Tmsb15l
chr10	37133242	37138926	NM_008538	0.03134	-	Marcks
chr18	61730261	61786662	NM_178928	0.03156	-	Afap1l1
chr11	115974724	116008411	NM_133663	0.03167	+	Itgb4
chr9	119357380	119393797	NM_001199568	0.03205	+	Xylb
chr3	92352142	92353449	NM_011471	0.03215	+	Sprr2e
chr10	102374436	102391468	NM_026243	0.03221	+	Mgat4c
chrX	9885620	9998864	NM_177704	0.03232	+	Sytl5
chr10	85598410	85660292	NM_001017525	0.03238	+	Btbd11
chr1	106538177	106714290	NM_009741	0.03247	-	Bcl2
chr3	84442195	84479491	NM_001205355	0.03339	-	Fhdc1
chrX	98557514	98890985	NM_052976	0.03364	-	Ophn1
chr3	36552605	36565727	NM_019393	0.03386	+	Exosc9
chr4	129713814	129742303	NM_011317	0.03503	-	Khdrbs1
chr5	130171818	130214337	NM_001199059	0.03653	+	Rabgef1
chr5	120800198	120812514	NM_033541	0.03699	-	Oas1c
chr2	91653207	91672320	NM_146124	0.03813	+	Arhgap1
chr4	49632059	49656886	NM_001163263	0.03845	+	Rnf20
chr7	92584182	92637142	NM_028665	0.0385	-	Ankrd42
chr18	21550376	21652368	NM_001081403	0.03865	-	Klhl14
chr6	148354655	148355596	NR_003634	0.0388	+	Rps4l
chr12	73964529	73984820	NM_178392	0.04014	+	Snapc1
chrX	133936384	133981812	NM_001290718	0.04129	-	Sytl4

## Sheet: LTF_direct_UPgenes_BETA_185
Chroms	txStart	txEnd	refseqID	rank product	Strands	GeneSymbol
chr1	186623185	186705992	NM_009367	6.672e-06	-	Tgfb2
chr4	59905898	59915056	NM_021053	1.921e-05	-	Slc46a2
chr15	100761746	100823971	NM_021530	1.998e-05	+	Slc4a8
chr2	69380461	69403086	NM_175512	6.717e-05	+	Dhrs9
chr1	52789419	52817688	NM_008384	7.686e-05	-	Inpp1
chr3	107741047	107760469	NM_007778	0.0001129	-	Csf1
chr11	120560303	120572936	NM_011032	0.0001472	-	P4hb
chr8	95352336	95374293	NM_008609	0.0001552	+	Mmp15
chr5	21372672	21378386	NM_008013	0.0001594	+	Fgl2
chr7	123462293	123468003	NM_001109045	0.0001601	+	Aqp8
chr11	59963180	59964942	NM_009026	0.0001778	-	Rasd1
chr5	129942108	129986692	NM_027121	0.0001789	+	Vkorc1l1
chr9	106887414	106891938	NM_029103	0.00019	-	Manf
chr4	136143821	136145392	NM_008321	0.0001935	+	Id3
chr2	119218118	119229865	NM_028104	0.0002357	-	Ppp1r14d
chr3	40745612	40790365	NM_011020	0.0002419	+	Hspa4l
chr11	68209363	68386826	NM_008744	0.000245	-	Ntn1
chr9	23223075	23485215	NM_028472	0.000282	+	Bmper
chr1	75171640	75180283	NM_023732	0.0003085	-	Abcb6
chr19	6977738	6980440	NM_008020	0.000315	-	Fkbp2
chr1	155127877	155146780	NM_008209	0.0003509	-	Mr1
chr15	66526211	66561046	NM_172514	0.0003856	-	Tmem71
chr6	29768442	29912310	NM_021414	0.0003995	+	Ahcyl2
chr7	81571291	81596836	NM_001004185	0.0004041	+	Whamm
chr18	3507956	3516404	NM_026505	0.0004089	+	Bambi
chr4	154020469	154026044	NM_001163722	0.000416	-	Smim1
chr10	121410350	121476250	NM_138956	0.0004189	-	Rassf3
chr18	32123125	32138205	NR_045173	0.0004405	-	Proc
chr12	108686791	108702306	NM_001171002	0.0004407	-	Degs2
chr18	56432131	56503792	NM_026240	0.0004845	+	Gramd3
chr12	28675206	28682174	NM_134052	0.0004879	+	Adi1
chr11	117966086	117969366	NM_007707	0.0005003	-	Socs3
chr17	80127470	80185032	NM_176963	0.0005031	+	Galm
chr1	91932748	92148393	NM_207225	0.0005123	-	Hdac4
chr15	81811413	81826863	NM_017376	0.0005301	+	Tef
chr10	79879666	79883172	NM_011178	0.000676	+	Prtn3
chr15	97854426	97908296	NM_009504	0.0007791	-	Vdr
chr9	57441326	57468060	NM_020270	0.000783	-	Scamp5
chr13	12790820	12800079	NM_011118	0.0007929	-	Prl2c3
chr6	119432530	119467211	NM_001271758	0.0007962	-	Wnt5b
chr1	193346345	193370282	NM_144817	0.0008089	-	Camk1g
chr16	92292388	92298133	NM_134110	0.0008219	+	Kcne2
chr16	32099801	32108054	NM_025892	0.0008395	+	Cep19
chr4	149979473	150003236	NM_001291004	0.0008881	-	H6pd
chr18	33437018	33463634	NM_053078	0.0009176	-	Nrep
chr5	36966103	36988982	NM_011716	0.0009321	-	Wfs1
chr16	32084415	32099727	NM_001111025	0.0009396	-	Pigx
chr6	72347316	72353160	NM_026696	0.001003	+	0610030E20Rik
chr17	24047719	24073485	NM_027008	0.001009	-	Kctd5
chr11	74383482	74590158	NM_001015046	0.001033	-	Rap1gap2
chr7	123377981	123430358	NM_025304	0.001036	+	Lcmt1
chr5	121444752	121452474	NM_026129	0.001042	-	Erp29
chr15	36997026	37007402	NM_026521	0.001049	-	Zfp706
chr12	113152011	113153879	NM_007763	0.001061	+	Crip1
chr8	70594480	70597290	NM_023627	0.001113	+	Isyna1
chr3	89246437	89249722	NM_025327	0.00112	+	Krtcap2
chr15	100304816	100314348	NM_027334	0.001128	+	Mettl7a1
chr12	110279229	110281097	NM_172119	0.00119	+	Dio3
chr4	133606991	133633429	NM_001017968	0.001225	-	Zdhhc18
chr13	51846674	51848474	NM_011817	0.001335	+	Gadd45g
chr8	70539674	70592858	NM_007924	0.001344	+	Ell
chr8	70483866	70487358	NM_182991	0.001366	-	Tmem59l
chr16	92301302	92313041	NM_138743	0.001382	+	Smim11
chr2	121358640	121363737	NM_009897	0.001398	+	Ckmt1
chr5	24586749	24592486	NM_133913	0.001417	+	Chpf2
chr19	6925689	6934515	NM_008431	0.001433	-	Kcnk4
chr4	142139239	142210208	NM_001109684	0.001441	-	Kazn
chr15	83299739	83350247	NM_025445	0.001467	-	Arfgap3
chr2	25234475	25236787	NM_001033410	0.001469	-	Rnf224
chr14	60768133	60780869	NM_183175	0.001498	+	C1qtnf9
chr16	31092412	31201238	NM_030138	0.001504	-	Acap2
chr18	20944624	20983848	NM_026301	0.001531	+	Rnf125
chr2	118861999	118881357	NM_019826	0.001553	+	Ivd
chr19	29714401	29806009	NM_172836	0.001584	-	9930021J03Rik
chr7	141461093	141466602	NM_001025103	0.001598	+	Cracr2b
chr8	70493155	70504081	NM_018827	0.001695	+	Crlf1
chr8	95420249	95434869	NM_008187	0.001719	-	Cfap20
chr14	27238009	27403911	NM_027871	0.00179	+	Arhgef3
chr11	115799351	115813592	NM_080643	0.001831	-	Caskin2
chr19	6982471	6987651	NM_011697	0.001848	-	Vegfb
chr10	80339792	80348448	NM_001285435	0.001861	-	Adamtsl5
chr19	6164457	6172475	NM_028967	0.001865	+	Batf2
chr1	164289799	164307484	NM_025505	0.001913	-	Blzf1
chr4	111919554	111950356	NM_001100466	0.001978	+	Skint8
chr7	141475235	141493427	NM_053082	0.002012	+	Tspan4
chr2	119237359	119249513	NM_016907	0.002026	+	Spint1
chr10	43874189	43901736	NM_001081054	0.002079	-	Qrsl1
chr11	35769494	35791285	NM_145962	0.002088	+	Pank3
chr9	57910985	57929968	NM_001122873	0.002095	+	Ubl7
chr15	100689914	100729376	NM_001161767	0.002127	-	Galnt6
chr3	99885416	100143322	NM_028892	0.002133	+	Spag17
chr11	75468049	75470899	NM_027249	0.00214	+	Tlcd2
chr11	75531693	75577572	NM_173388	0.002149	+	Slc43a2
chr1	82756648	82768456	NM_025453	0.00215	-	Tm4sf20
chr6	120666420	120771191	NM_001128151	0.002172	+	Cecr2
chr4	59314682	59438633	NM_001163288	0.00221	-	Susd1
chr5	37050856	37125298	NM_178394	0.002333	+	Jakmip1
chr2	153161300	153210463	NM_133847	0.002353	+	Tm9sf4
chrX	7884243	7894492	NM_078484	0.002384	+	Slc35a2
chr4	155601415	155623340	NM_177186	0.002402	+	Slc35e2
chr1	65158615	65186479	NM_001111320	0.002466	-	Idh1
chr10	43901806	43947862	NM_130892	0.002498	+	Rtn4ip1
chr1	52845045	52920860	NM_146108	0.002516	+	Hibch
chr4	133553389	133556536	NM_011850	0.00265	+	Nr0b2
chr15	100392657	100423055	NM_001146161	0.002683	-	Slc11a2
chr16	92391950	92466169	NM_001081549	0.002718	-	Rcan1
chr19	38116619	38125321	NM_001159487	0.002749	-	Rbp4
chr2	118901614	118924524	NM_001045523	0.002874	+	Bahd1
chr13	3882017	3918220	NM_019671	0.002925	-	Net1
chr17	24753002	24758684	NM_001012402	0.002927	+	Hs3st6
chr16	92058321	92087473	NM_017391	0.002946	+	Slc5a3
chr5	65987927	66004285	NR_027961	0.003011	-	9130230L23Rik
chr8	105276446	105281939	NM_030152	0.003069	+	Nol3
chr17	34616661	34627148	NM_019441	0.00313	-	Ppt2
chr15	100353199	100361819	NM_199477	0.003143	+	Mettl7a2
chr4	149149984	149166707	NM_001081274	0.003178	-	Pgd
chr9	108096021	108190383	NM_007567	0.003184	-	Bsn
chr8	109575127	109579172	NM_017370	0.003245	-	Hp
chr2	173153072	173159253	NM_011044	0.003278	+	Pck1
chr5	66016548	66098179	NM_139065	0.003323	-	Rbm47
chr11	65688243	65788297	NM_009157	0.003369	-	Map2k4
chr17	24685091	24689949	NM_011522	0.003422	-	Syngr3
chr8	95332283	95347513	NM_133954	0.003457	+	Usb1
chr17	29135055	29148976	NM_001002786	0.003487	+	Rab44
chr5	76183879	76209244	NM_011626	0.003583	+	Tmem165
chr7	44879385	44892366	NM_029365	0.003668	-	Med25
chr14	60784565	60903613	NM_027436	0.003736	+	Mipep
chr8	72477994	72492614	NM_177766	0.003867	-	Slc35e1
chr14	70217864	70289497	NM_008915	0.003912	-	Ppp3cc
chr6	145174871	145210970	NM_177222	0.00392	-	Casc1
chr10	80035952	80039659	NM_025554	0.00392	-	Polr2e
chr10	24641410	24712102	NM_008813	0.003953	-	Enpp1
chr3	133159530	133234889	NM_029953	0.00401	-	Arhgef38
chr7	131032075	131121628	NM_007769	0.004103	+	Dmbt1
chr8	70629393	70631635	NM_011819	0.00421	-	Gdf15
chr13	74480056	74493950	NM_146231	0.004251	-	Zfp825
chr15	101349570	101370125	NM_028770	0.004369	-	Krt80
chr4	136172393	136196056	NM_177733	0.00439	+	E2f2
chr15	101946003	101954287	NM_212487	0.004605	-	Krt78
chr11	115912016	115913917	NM_001162998	0.004709	+	Smim6
chr3	89183224	89189289	NM_001014995	0.004754	+	Fam189b
chr10	88322803	88357075	NM_027878	0.00476	-	Dram1
chr6	29694213	29718558	NM_001301407	0.004772	+	Tspan33
chr4	148434496	148444751	NM_027873	0.004836	-	Ubiad1
chr9	35211202	35217003	NM_026130	0.004916	+	Srpr
chr2	30171523	30174069	NM_007931	0.004929	+	Endog
chr8	70724063	70751176	NM_201607	0.004938	+	Pde4c
chr12	108334380	108362234	NM_010010	0.004964	+	Cyp46a1
chr9	57504101	57505447	NM_133982	0.005002	+	Rpp25
chr17	24736641	24742778	NM_013759	0.005018	+	Msrb1
chr1	131053703	131097543	NM_008551	0.005051	-	Mapkapk2
chr7	28881655	28893585	NM_001110807	0.005368	+	Capn12
chr17	57203972	57228136	NM_009778	0.00585	-	C3
chr7	45492673	45510408	NM_008749	0.005888	-	Nucb1
chr7	141493135	141539857	NM_001142681	0.005954	-	Chid1
chr9	119102477	119147694	NM_177117	0.006068	+	Dlec1
chr11	95384921	95391652	NM_016752	0.006094	+	Slc35b1
chr8	70597489	70608314	NM_133772	0.006186	-	Ssbp4
chr7	30314815	30319045	NM_153577	0.006307	+	Syne4
chr15	100334928	100340169	NM_001081471	0.006691	+	Mettl7a3
chr14	59559387	59597959	NM_001168535	0.006712	-	Cdadc1
chr5	115142980	115158176	NM_175403	0.006754	-	Mlec
chr16	92058335	92112227	NM_080456	0.006813	+	Mrps6
chr6	143010919	143100152	NM_029897	0.006901	-	C2cd5
chr3	88549818	88552927	NM_031248	0.006986	-	Lamtor2
chr7	141015811	141016892	NM_001033632	0.007073	-	Ifitm6
chr1	182275769	182282759	NM_007853	0.007148	-	Degs1
chr15	100469033	100479252	NM_134093	0.007222	+	Letmd1
chr10	99107170	99197988	NM_027740	0.007258	+	Poc1b
chr18	32163088	32236751	NM_011946	0.007265	+	Map3k2
chr7	102015076	102018155	NM_010531	0.007286	-	Il18bp
chr3	90231596	90235840	NM_206924	0.007369	+	Jtb
chr8	95239042	95306585	NM_001195413	0.007386	-	Cngb1
chr7	44731481	44748617	NM_178734	0.007583	-	Zfp473
chr11	116105749	116110235	NM_172570	0.007609	-	Trim47
chr13	41249843	41276577	NM_001135577	0.008231	+	Smim13
chr7	44896078	44900624	NM_027376	0.008415	+	Fuz
chr5	115631986	115647158	NM_198163	0.008505	+	Rab35
chr16	8633730	8637701	NM_025708	0.00878	-	Tmem186
chr4	116066964	116075070	NM_025641	0.008849	-	Uqcrh
chr4	19608299	19709004	NM_177327	0.008885	-	Wwp1
chr2	119136997	119157034	NM_001033136	0.009259	-	Rmdn3
chr10	80665317	80676293	NM_021462	0.009324	-	Mknk2
chr4	107178629	107200996	NM_029565	0.009367	+	Tmem59
chr2	121310560	121351013	NM_178795	0.009481	-	Ppip5k1
